# Supplementary material for: Connectivity Map Analysis of a Single-Cell RNA-Sequencing -Derived Transcriptional Signature of mTOR Signaling
Source: MDPI journal article supplement (doi:10.3390/ijms22094371), 2021-04-22
Supplement: s1 [file s1]

# Connectivity analysis of single cell RNA-sequencing derived transcriptional signature of lymphangioleiomyomatosis

**Naim Al Mahi<sup>1</sup>, Erik Y. Zhang<sup>3</sup>, Susan Sherman<sup>4</sup>, Jane J. Yu<sup>3</sup> and Mario Medvedovic<sup>1,2,\*</sup>**

<sup>1</sup>Division of Biostatistics and Bioinformatics, Department of Environmental and Public Health Sciences, University of Cincinnati College of Medicine, Cincinnati, OH 45267, USA

<sup>2</sup>Department of Biomedical Informatics, University of Cincinnati College of Medicine, Cincinnati, OH 45267, USA

<sup>3</sup>Division of Pulmonary, Critical Care and Sleep Medicine, University of Cincinnati College of Medicine, Cincinnati, OH 45267, USA

<sup>4</sup>The LAM Foundation, Cincinnati, OH 45242, USA

\*[medvedm@ucmail.uc.edu](mailto:medvedm@ucmail.uc.edu)

---

**A)**

**Pairwise DE using MAST**

Step 1: tSNE plot showing clusters 1, 2, 3, 4. Cluster 1 is highlighted with red stars. A table shows pairwise DE results for Gene 1, Gene 2, etc., comparing cluster 1 to clusters 2, 3, and 4. The results include  $\pi$  scores and  $P$ -values. A one sample  $t$ -test is performed on the  $\pi$  scores for each gene under the hypotheses:  $H_0: \mu_t^\pi = \mu_0$  vs.  $H_1: \mu_t^\pi > \mu_0$ , where null value is considered as 2 by considering  $P=0.01$  and  $\varphi=1$ . Cell types are then identified by conducting functional enrichment of the top differentially upregulated (DU) genes. Step 1 is repeated for each of the clusters to identify corresponding cell types. In step 2, clusters from both LAM and normal samples are matched based on their DU genes and Fisher's exact test is used to test for cluster similarity. Finally, LAM cluster (say, D1) is then compared with the matching normal clusters (say, N1 and N6) to create the signature of the LAM cluster.

**Step 2: Matching DE genes**

Two tSNE plots show clusters D1, D2, D3, D4 and N1, N2, N3, N4, N5, N6. A heatmap shows the matching DE genes. Fisher's exact test is used to test for cluster similarity. A LAM signature is then created by comparing the matching normal clusters (say, N1 and N6) to the LAM cluster (D1).

**B)**

**LAM signature**

Gene 1, Gene 125, Gene 126, Gene 250

Matching with 978 L1000 LM genes

Pearson correlation

**L1000 L1000 signatures**

Sig1, Sig2, Sig3, ..., Sig143,374

**MOA 1005**

MOA 1, MOA 2, MOA 1, MOA 2, MOA 1005

Sig 1, Sig 2, Sig 3, Sig 4, Sig 5, Sig 86,538

**Response, MOAk**

**$-\log_{10}(P_{\text{Down}})$**

**Supplementary Figure 1. Conceptual framework for constructing LAM signature and connectivity analysis.** **A)** Hypothetical example illustrating identification of the cell types and signature construction of the LAM cell clusters. In step 1, pairwise differential expression (DE) is created for a single cluster (say cluster 1) such as, cluster 1 vs. cluster 2, cluster 1 vs. cluster 3 etc. using MAST Bioconductor package which generates a DE table with log2 fold changes ( $\varphi$ ) and FDR-adjusted  $P$ -values ( $P$ ) for each comparison and  $\pi$  scores are calculated for each of the comparisons by multiplying  $-\log_{10}(P)$  and  $\varphi$ . Pairwise DE results are then combined into a single DE by employing a one sample  $t$ -test of the  $\pi$  scores for each gene under the hypotheses:  $H_0: \mu_t^\pi = \mu_0$  vs.  $H_1: \mu_t^\pi > \mu_0$ , where null value is considered as 2 by considering  $P=0.01$  and  $\varphi=1$ . Cell types are then identified by conducting functional enrichment of the top differentially upregulated (DU) genes. Step 1 is repeated for each of the clusters to identify corresponding cell types. In step 2, clusters from both LAM and normal samples are matched based on their DU genes and Fisher's exact test is used to test for cluster similarity. Finally, LAM cluster (say, D1) is then compared with the matching normal clusters (say, N1 and N6) to create the signature of the LAM cluster. **B)** For connectivity analysis, 125 most significantly up and 125 most significantly down regulated genes from LAM signature from (A) is matched with 978 L1000 landmark genes and correlated with each of the 143,374 L1000 chemical perturbation (CP) signatures using Pearson correlation. Down regulated FDR adjusted  $P$ -values ( $-\log_{10}$  scale) of the correlations and corresponding mechanism of action (MOA) categories are extracted for L1000-CP signatures. A total of 1005 unique MOAs are considered with the corresponding 86,538 signatures where each MOA has at least 1 associated signature. A binary logistic regression model with adjustment for small sample bias is then fitted for each of the MOA categories where negative logarithm of FDR-adjusted down-regulated  $P$ -values of the correlations between LAM and L1000-CP signatures is considered as the predictor variable.

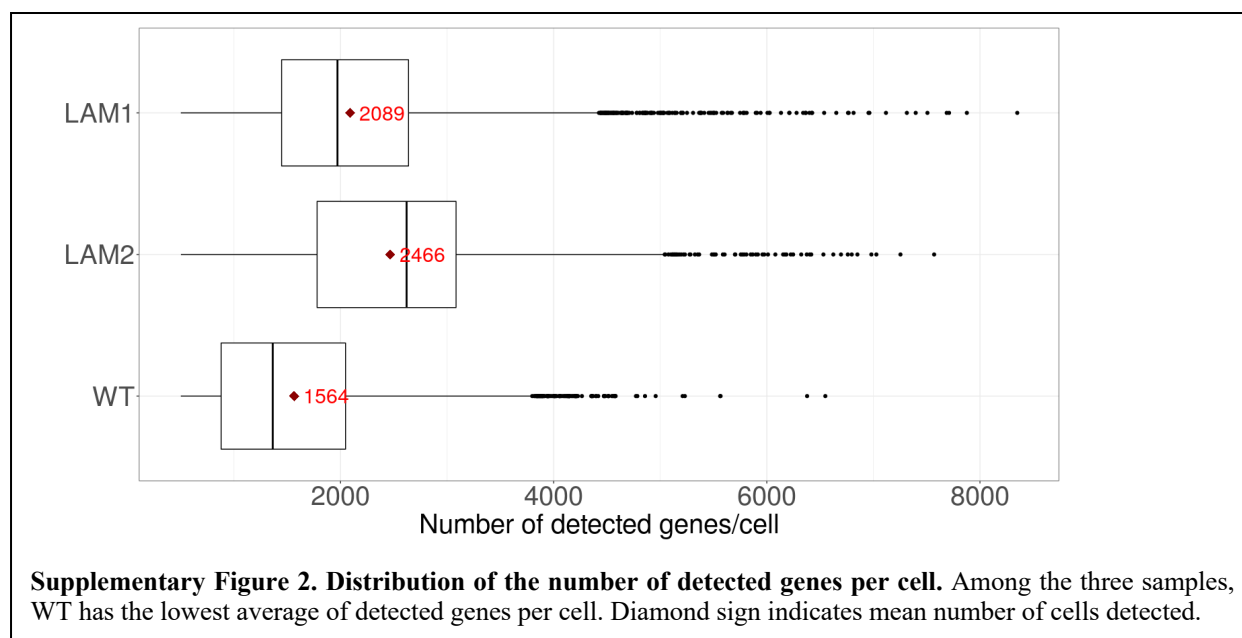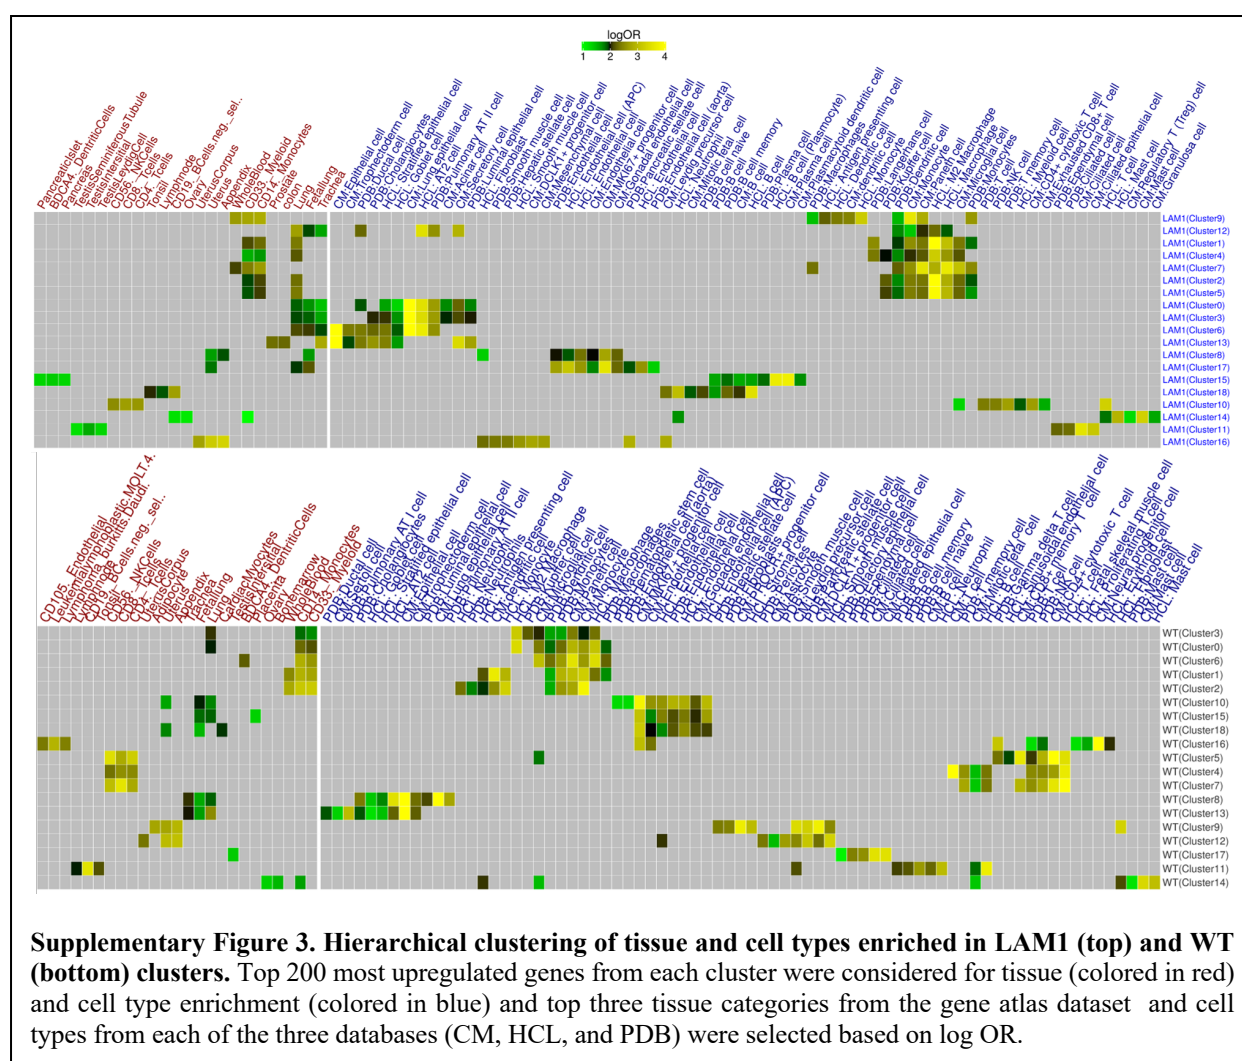

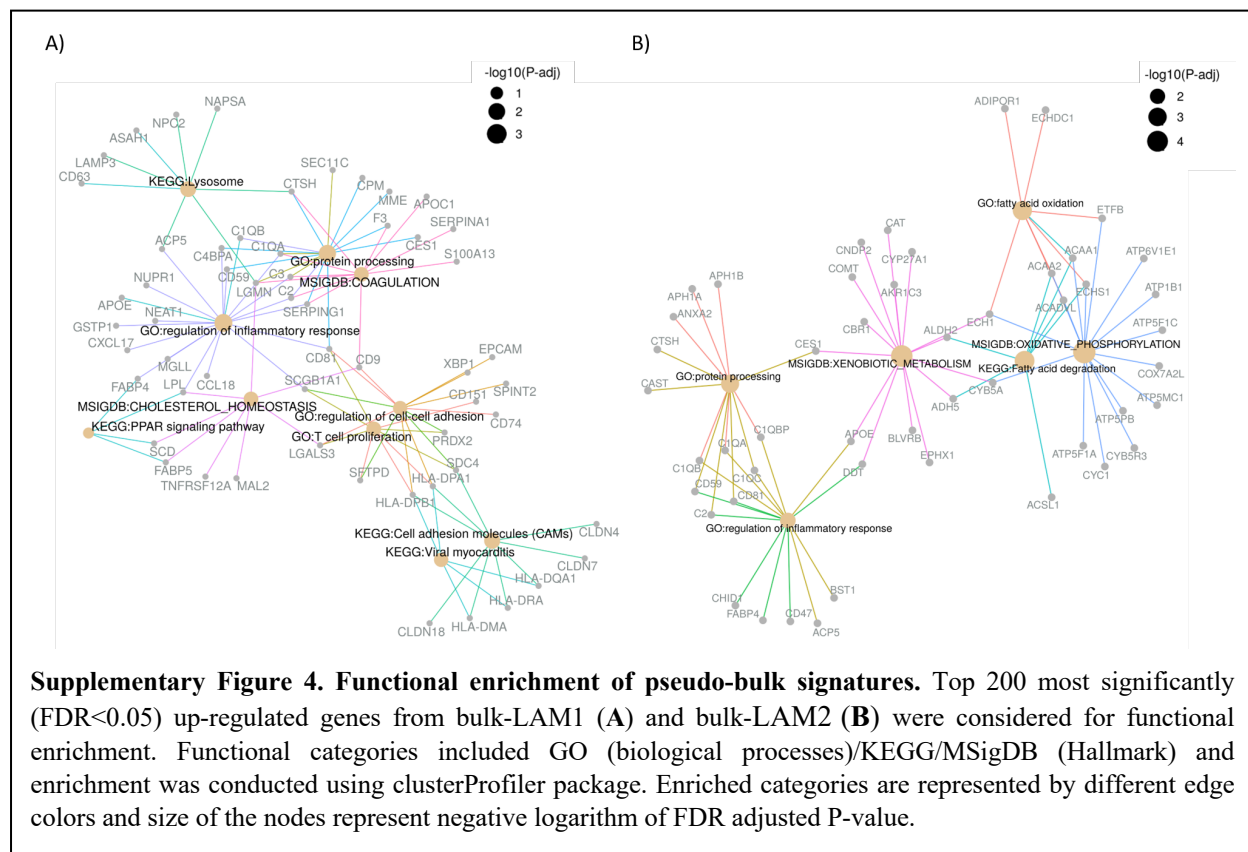

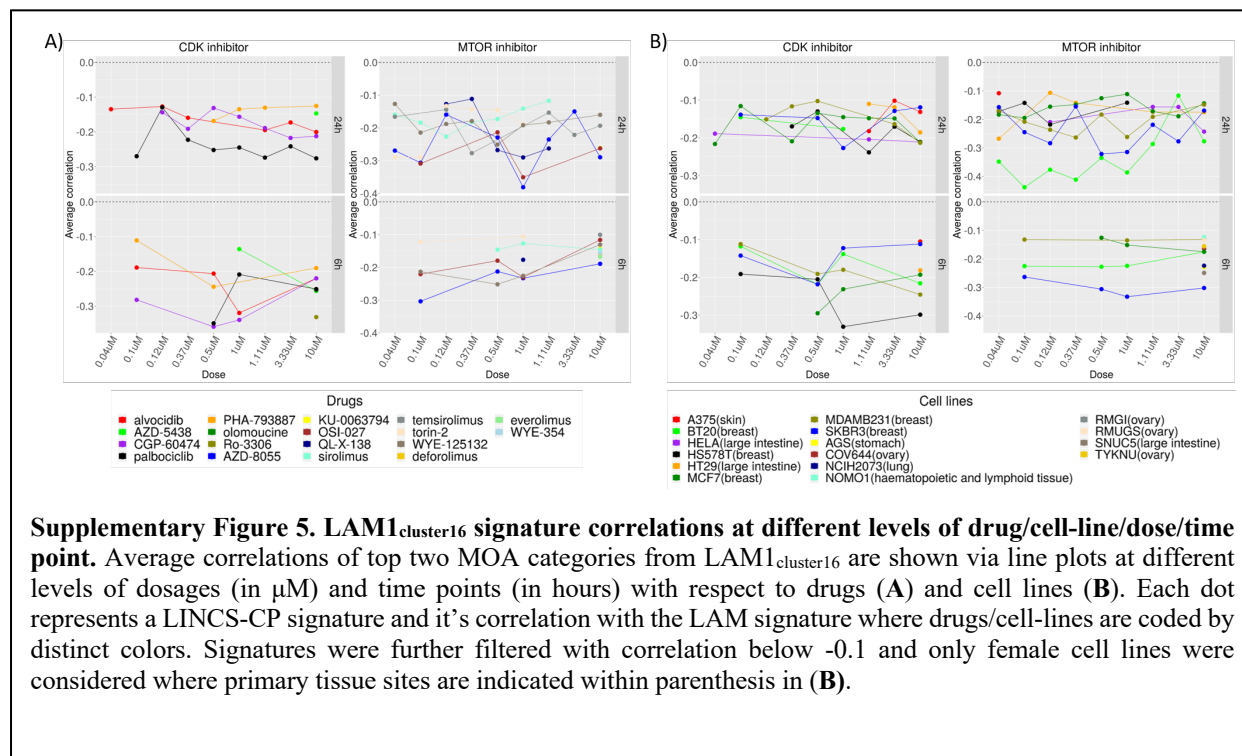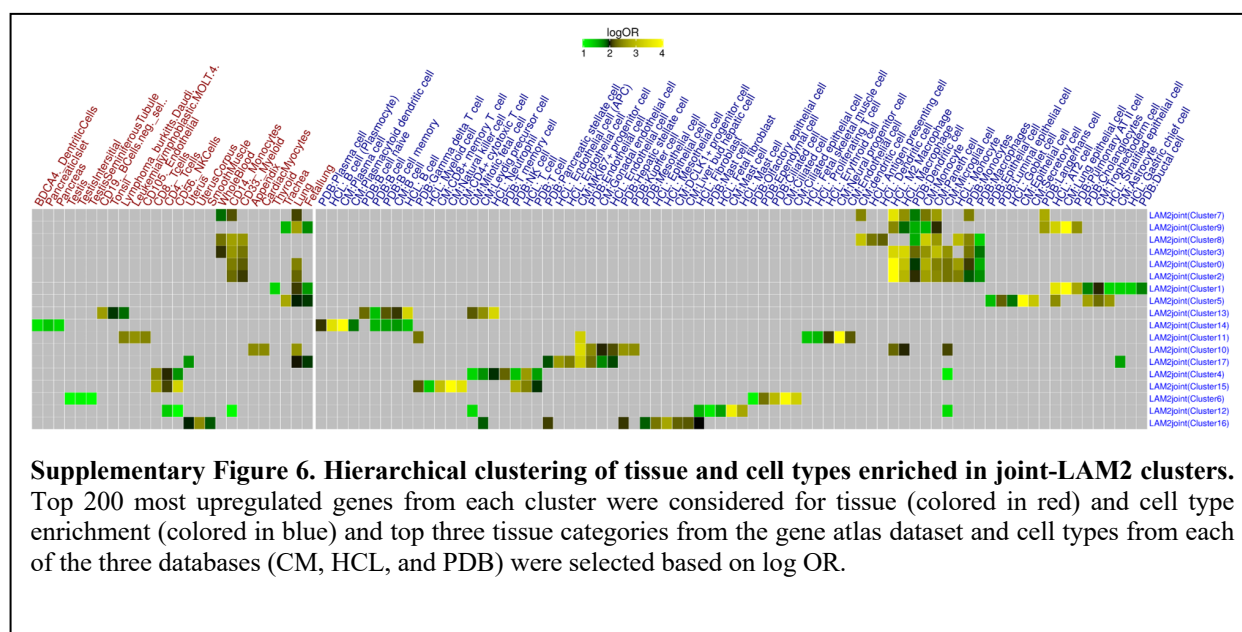

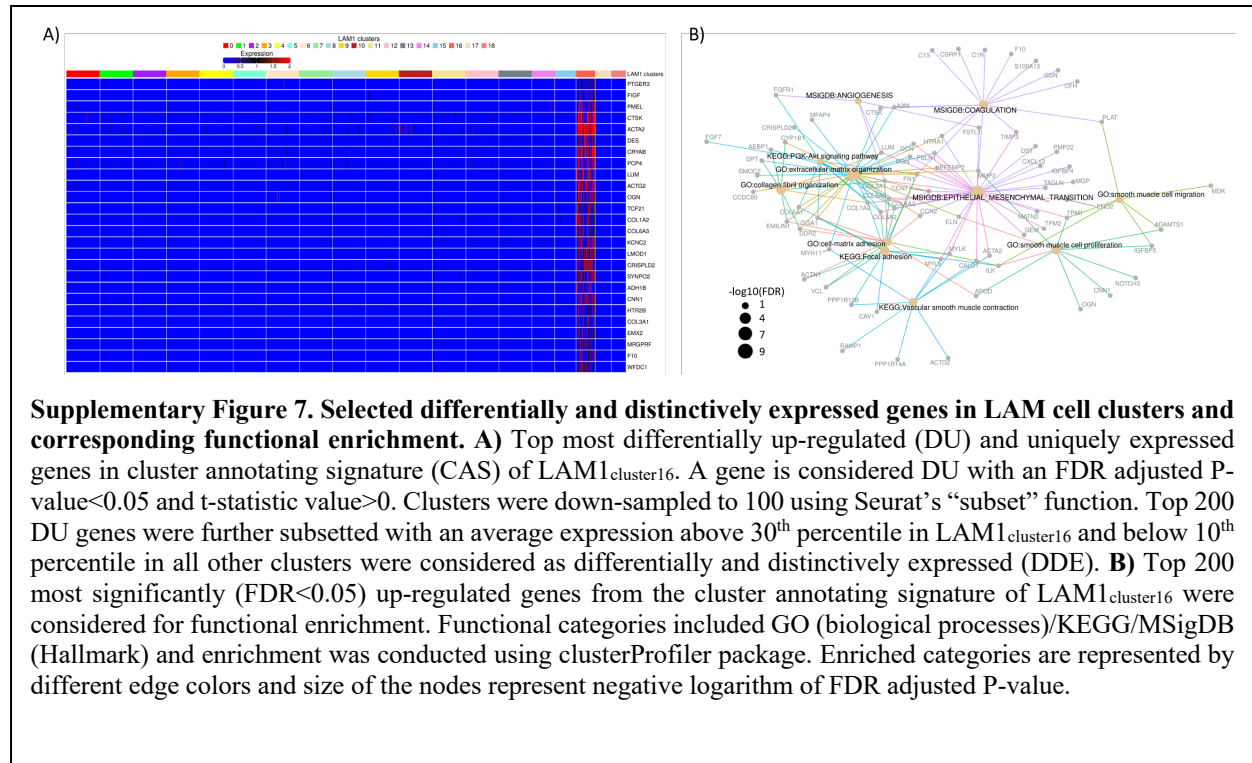

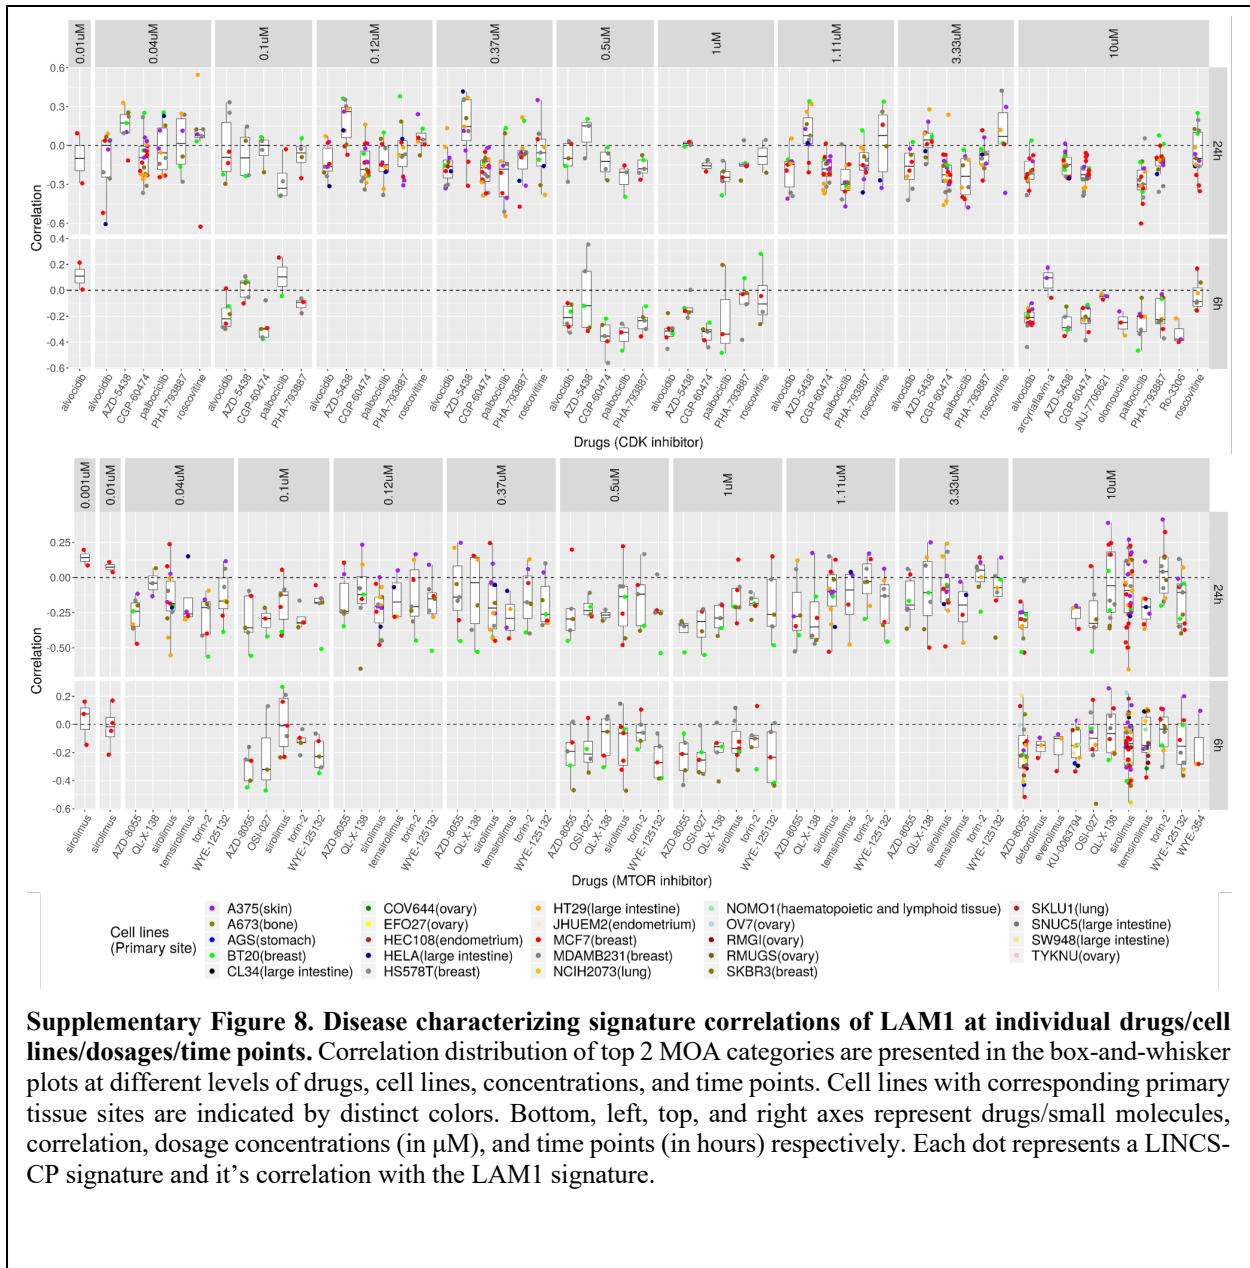

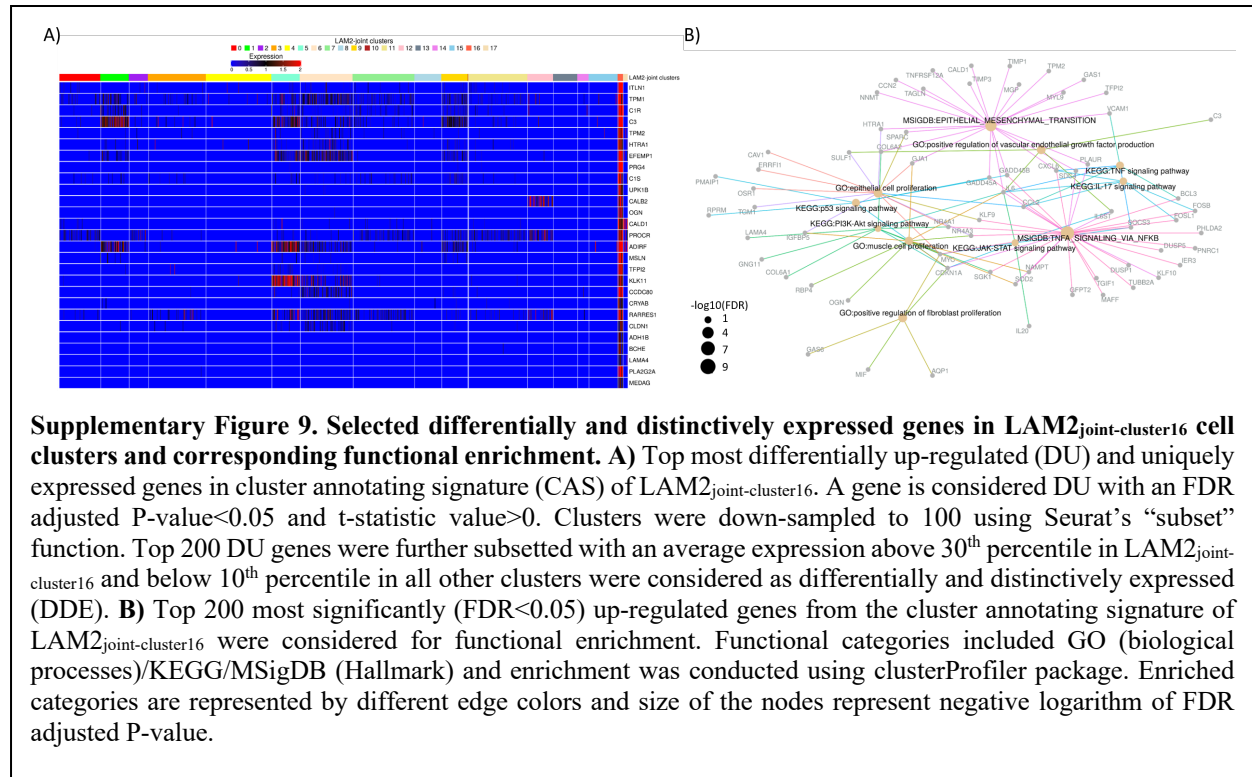



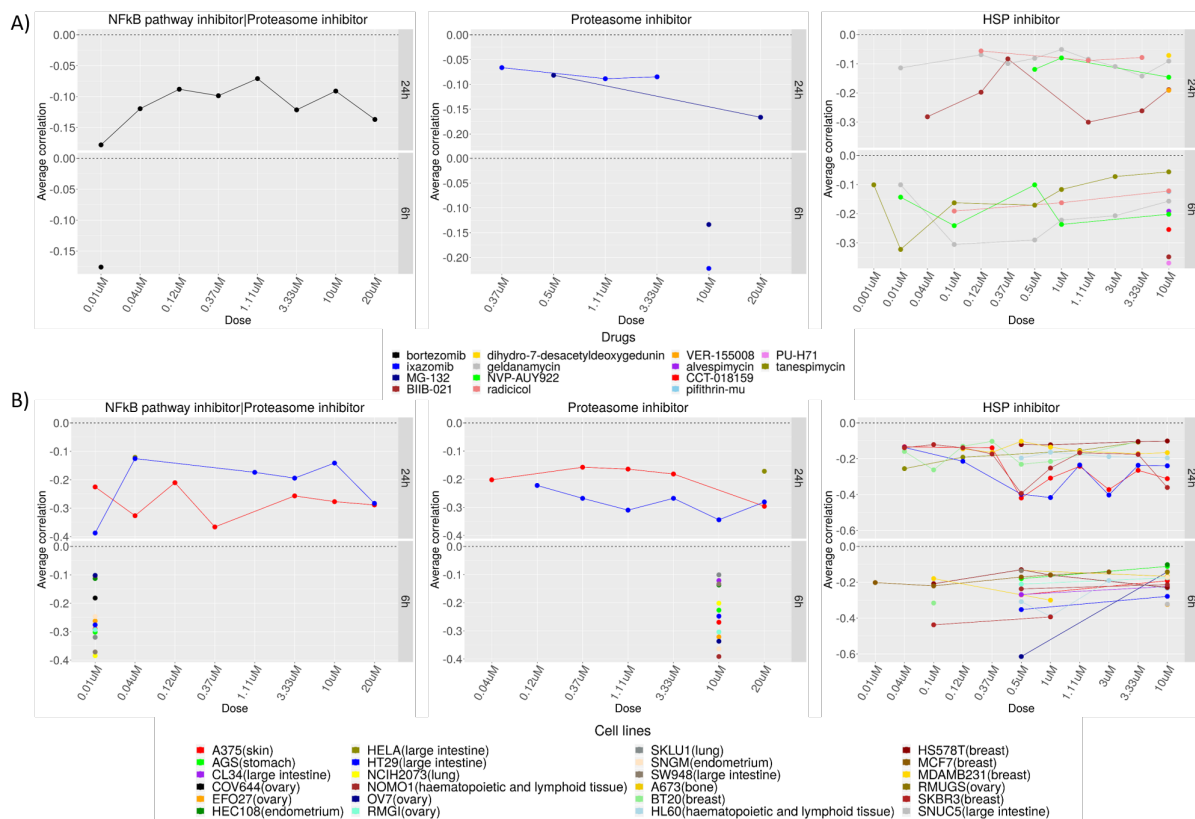

**Supplementary Figure 10. LAM2 signature correlations at different levels of drug/cell-line/dose/time point.**

Average correlations of top three MOA categories from LAM2<sub>joint-cluster16</sub> are shown via line plots at different levels of dosages (in  $\mu\text{M}$ ) and time points (in hours) with respect to drugs (A) and cell lines (B). Each dot represents a LINC-CP signature and its correlation with the LAM signature where drugs/cell-lines are coded by distinct colors. Signatures were further filtered with correlation below -0.05 and only female cell lines were considered where primary tissue sites are indicated within parenthesis in (B).

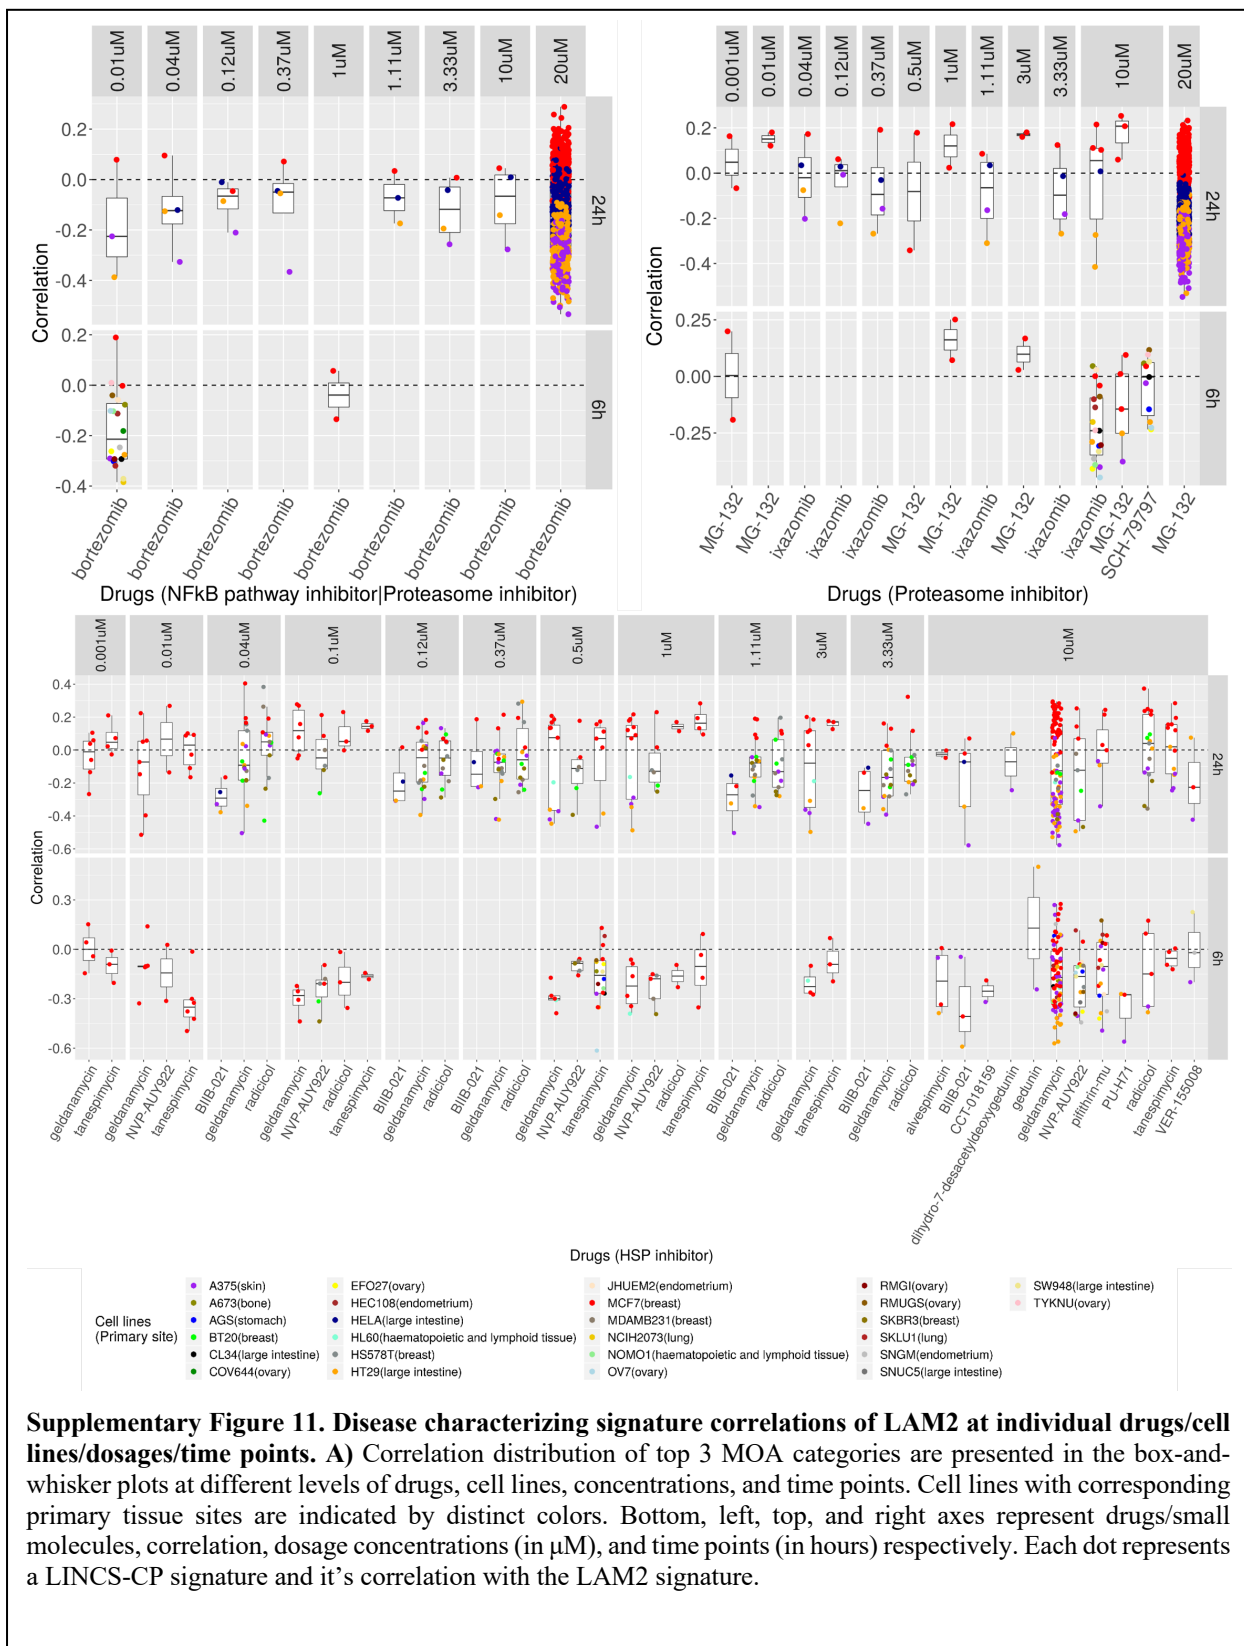

## Supplementary tables

| Markers | Reference                                                                    |
|---------|------------------------------------------------------------------------------|
| PTGER3  | Li et al., 2017 <sup>1</sup>                                                 |
| PMEL    | Hoon et al., 1994 <sup>2</sup>                                               |
| PCP4    | Guo et al., 2020 <sup>3</sup>                                                |
| CTSK    | Chilosi et al., 2009 <sup>4</sup>                                            |
| ACTA2   | Zhe et al., 2004 <sup>5</sup> , Matsui et al., 2001 <sup>6</sup>             |
| FIGF    | Seyama et al., 2006 <sup>7</sup>                                             |
| DES     | Matsui et al., 2001 <sup>6</sup> , Taveira-DaSilva et al., 2006 <sup>8</sup> |
| CRYAB   | Iwaki and Tateishi, 1991 <sup>9</sup>                                        |

**Supplementary Table 1. List of known LAM markers.** A set of 8 markers associated with LAM are curated from the literature.

|            | OR<br>LAM1 | PValue<br>LAM1 | OR<br>LAM2 | PValue<br>LAM2 | OR<br>JointLAM | PValue<br>JointLAM | OR<br>JointLAM2 | PValue<br>JointLAM2 |
|------------|------------|----------------|------------|----------------|----------------|--------------------|-----------------|---------------------|
| Cluster:0  | 0          | 1              | 0          | 1              | 0              | 1                  | 0               | 1                   |
| Cluster:1  | 0          | 1              | 0          | 1              | 0              | 1                  | 0               | 1                   |
| Cluster:2  | 0          | 1              | 0          | 1              | 0              | 1                  | 0               | 1                   |
| Cluster:3  | 0          | 1              | 0          | 1              | 2.1227         | 0.4063             | 3.4012          | 0.28075             |
| Cluster:4  | 0          | 1              | 0          | 1              | 0              | 1                  | 0               | 1                   |
| Cluster:5  | 0          | 1              | 0          | 1              | 0              | 1                  | 0               | 1                   |
| Cluster:6  | 0          | 1              | 2.7848     | 0.3301         | 0              | 1                  | 0               | 1                   |
| Cluster:7  | 0          | 1              | 0          | 1              | 0              | 1                  | 0               | 1                   |
| Cluster:8  | 0          | 1              | 0          | 1              | 0              | 1                  | 0               | 1                   |
| Cluster:9  | 0          | 1              | 0          | 1              | 0              | 1                  | 0               | 1                   |
| Cluster:10 | 0          | 1              | 0          | 1              | 0              | 1                  | 0               | 1                   |
| Cluster:11 | 0          | 1              | 0          | 1              | 0              | 1                  | 0               | 1                   |
| Cluster:12 | 0          | 1              | 2.2081     | 0.3947         | 0              | 1                  | 0               | 1                   |
| Cluster:13 | 0          | 1              | 0          | 1              | 0              | 1                  | 0               | 1                   |
| Cluster:14 | 0          | 1              | 0          | 1              | 0              | 1                  | 0               | 1                   |
| Cluster:15 | 0          | 1              | 0          | 1              | 0              | 1                  | 0               | 1                   |
| Cluster:16 | Inf        | 1.32E-09       | 0          | 1              | Inf            | 3.31E-10           | 48.538          | 2.14E-06            |
| Cluster:17 | 0          | 1              | 0          | 1              | 0              | 1                  | 0               | 1                   |
| Cluster:18 | 0          | 1              | 0          | 1              | NA             | NA                 | NA              | NA                  |

**Supplementary Table 2. Enrichment of 8 LAM markers in LAM1, LAM2-joint, and LAM-integrated clusters.** Significantly differentially up-regulated genes (FDR<0.05) were considered for marker enrichment. Odds ratio (OR) and P-values were calculated using Fisher's exact test. Infinite OR means all the 8 markers are present in the signature of the corresponding cluster.

| MOA                                                                                             | Estimate | PValue   | FDR      | OR    | 95% lower | 95% upper | No. of signatures | No. of compounds |
|-------------------------------------------------------------------------------------------------|----------|----------|----------|-------|-----------|-----------|-------------------|------------------|
| CDK inhibitor                                                                                   | 0.863    | 2.89E-85 | 4.31E-83 | 2.371 | 2.174     | 2.585     | 1701              | 15               |
| MTOR inhibitor                                                                                  | 0.83     | 5.85E-75 | 4.36E-73 | 2.314 | 2.115     | 2.531     | 1592              | 12               |
| PI3K inhibitor                                                                                  | 0.630    | 2.65E-65 | 1.32E-63 | 1.878 | 1.747     | 2.019     | 2922              | 19               |
| HSP inhibitor                                                                                   | 0.634    | 3.06E-45 | 1.14E-43 | 1.885 | 1.727     | 2.059     | 1904              | 14               |
| PI3K inhibitor MTOR inhibitor                                                                   | 0.974    | 4.04E-33 | 1.2E-31  | 2.649 | 2.259     | 3.106     | 428               | 2                |
| HDAC inhibitor                                                                                  | 0.461    | 7.13E-33 | 1.77E-31 | 1.587 | 1.471     | 1.712     | 2947              | 41               |
| MEK inhibitor MAP kinase inhibitor Protein kinase inhibitor                                     | 0.703    | 7.97E-22 | 1.7E-20  | 2.02  | 1.75      | 2.332     | 652               | 1                |
| MTOR inhibitor DNA dependent protein kinase inhibitor Phosphodiesterase inhibitor PLK inhibitor | 1.004    | 1.61E-21 | 3E-20    | 2.73  | 2.22      | 3.357     | 244               | 1                |
| RNA polymerase inhibitor                                                                        | 1.022    | 2.74E-15 | 4.54E-14 | 2.78  | 2.157     | 3.582     | 158               | 6                |
| CDK inhibitor Cell cycle inhibitor MCL1 inhibitor                                               | 0.947    | 3.34E-13 | 4.52E-12 | 2.579 | 1.999     | 3.329     | 166               | 1                |
| RAF inhibitor                                                                                   | 0.450    | 2.49E-12 | 3.09E-11 | 1.57  | 1.384     | 1.781     | 1021              | 9                |
| Glucocorticoid receptor agonist                                                                 | 0.422    | 1.83E-10 | 2.09E-09 | 1.526 | 1.34      | 1.738     | 980               | 42               |
| HDAC inhibitor CDK expression enhancer ID1 expression inhibitor                                 | 0.384    | 2.73E-08 | 2.14E-07 | 1.469 | 1.283     | 1.682     | 924               | 1                |
| AKT inhibitor                                                                                   | 0.417    | 3.89E-08 | 2.9E-07  | 1.519 | 1.308     | 1.763     | 744               | 8                |
| EGFR inhibitor JAK inhibitor Leukotriene inhibitor Mediator release inhibitor                   | 0.82     | 8.47E-08 | 6.01E-07 | 2.273 | 1.683     | 3.069     | 132               | 1                |
| MAP kinase inhibitor Protein kinase inhibitor                                                   | 0.885    | 1.34E-07 | 9.07E-07 | 2.424 | 1.744     | 3.369     | 104               | 1                |
| Aurora kinase inhibitor Bcr-Abl kinase inhibitor FLT3 inhibitor JAK inhibitor                   | 0.454    | 9.13E-05 | 0.00041  | 1.575 | 1.255     | 1.978     | 307               | 1                |
| RNA synthesis inhibitor Topoisomerase inhibitor                                                 | 0.610    | 9.35E-05 | 0.00041  | 1.841 | 1.355     | 2.5       | 150               | 1                |
| VEGFR inhibitor                                                                                 | 0.346    | 0.000198 | 0.00082  | 1.414 | 1.178     | 1.698     | 518               | 9                |
| CLK2 inhibitor                                                                                  | 0.589    | 0.000269 | 0.00104  | 1.803 | 1.313     | 2.475     | 142               | 1                |

|                                                                                                                     |       |          |          |       |       |       |      |    |
|---------------------------------------------------------------------------------------------------------------------|-------|----------|----------|-------|-------|-------|------|----|
| EPHB3 inhibitor                                                                                                     | 0.659 | 0.000272 | 0.00104  | 1.934 | 1.356 | 2.757 | 107  | 1  |
| ITK inhibitor                                                                                                       | 0.604 | 0.000878 | 0.002845 | 1.83  | 1.282 | 2.613 | 111  | 2  |
| FLT3 inhibitor KIT inhibitor PDGFR tyrosine kinase receptor inhibitor RAD51 inhibitor RET tyrosine kinase inhibitor | 0.515 | 0.001263 | 0.00384  | 1.674 | 1.224 | 2.289 | 154  | 1  |
| CDK inhibitor Cell cycle inhibitor                                                                                  | 0.425 | 0.001835 | 0.004965 | 1.53  | 1.171 | 2     | 226  | 1  |
| IGF-1 inhibitor                                                                                                     | 0.356 | 0.00302  | 0.007143 | 1.428 | 1.129 | 1.808 | 307  | 6  |
| Topoisomerase inhibitor                                                                                             | 0.187 | 0.003463 | 0.007938 | 1.207 | 1.064 | 1.368 | 1229 | 22 |
| Inositol monophosphatase inhibitor                                                                                  | 0.496 | 0.005217 | 0.011265 | 1.643 | 1.16  | 2.327 | 126  | 3  |
| Calcineurin inhibitor                                                                                               | 0.403 | 0.00676  | 0.013799 | 1.497 | 1.118 | 2.003 | 193  | 3  |
| ALK tyrosine kinase receptor inhibitor                                                                              | 0.235 | 0.033956 | 0.043968 | 1.266 | 1.018 | 1.574 | 391  | 2  |

**Supplementary Table 3. MOA enrichment of disease characterizing signature of LAM1<sub>cluster16</sub>.**  
Categories are selected with at least 100 signatures.

| MOA                                                                                                                                      | Estimate | PValue   | FDR       | OR    | 95% lower | 95% upper | No. of signatures | No. of compounds |
|------------------------------------------------------------------------------------------------------------------------------------------|----------|----------|-----------|-------|-----------|-----------|-------------------|------------------|
| NFkB pathway inhibitor Proteasome inhibitor                                                                                              | 1.389    | 0        | 0         | 4.011 | 3.741     | 4.3       | 2214              | 1                |
| Proteasome inhibitor                                                                                                                     | 1.466    | 0        | 0         | 4.333 | 4.049     | 4.636     | 2345              | 5                |
| HSP inhibitor                                                                                                                            | 0.823    | 6.09E-85 | 3.207E-83 | 2.276 | 2.096     | 2.472     | 1904              | 14               |
| MTOR inhibitor                                                                                                                           | 0.596    | 7.04E-34 | 2.783E-32 | 1.814 | 1.648     | 1.998     | 1592              | 12               |
| Farnesyltransferase inhibitor NFkB pathway inhibitor                                                                                     | 1.267    | 2E-24    | 6.311E-23 | 3.552 | 2.784     | 4.531     | 136               | 1                |
| KIT inhibitor Src inhibitor Bcr-Abl kinase inhibitor Ephrin inhibitor PDGFR tyrosine kinase receptor inhibitor Tyrosine kinase inhibitor | 0.668    | 5.89E-20 | 1.55E-18  | 1.95  | 1.69      | 2.25      | 662               | 1                |
| PI3K inhibitor                                                                                                                           | 0.257    | 3.73E-10 | 5.89E-09  | 1.293 | 1.193     | 1.401     | 2922              | 19               |

|                                                                                                            |       |          |           |       |       |       |      |    |
|------------------------------------------------------------------------------------------------------------|-------|----------|-----------|-------|-------|-------|------|----|
| Topoisomerase inhibitor                                                                                    | 0.356 | 3.56E-09 | 5.12E-08  | 1.427 | 1.268 | 1.606 | 1229 | 22 |
| EGFR inhibitor                                                                                             | 0.316 | 5.54E-09 | 7.298E-08 | 1.371 | 1.233 | 1.525 | 1575 | 30 |
| PI3K inhibitor MTOR inhibitor                                                                              | 0.54  | 1.24E-08 | 1.513E-07 | 1.715 | 1.425 | 2.065 | 428  | 2  |
| Cyclooxygenase inhibitor Histone acetyltransferase inhibitor Lipoxygenase inhibitor NFkB pathway inhibitor | 0.669 | 1.19E-06 | 1.174E-05 | 1.952 | 1.49  | 2.556 | 182  | 1  |
| RNA synthesis inhibitor Topoisomerase inhibitor                                                            | 0.688 | 4.74E-06 | 3.741E-05 | 1.989 | 1.482 | 2.671 | 150  | 1  |
| Glutathione transferase inhibitor                                                                          | 0.719 | 3.8E-05  | 0.0002311 | 2.053 | 1.458 | 2.89  | 108  | 2  |
| AKT inhibitor                                                                                              | 0.316 | 5.26E-05 | 0.0002683 | 1.372 | 1.177 | 1.599 | 744  | 8  |
| Histone acetyltransferase inhibitor                                                                        | 0.587 | 0.000728 | 0.0024098 | 1.799 | 1.28  | 2.529 | 121  | 2  |
| JAK inhibitor Lipocortin synthesis stimulant STAT inhibitor                                                | 0.595 | 0.001448 | 0.0040124 | 1.812 | 1.257 | 2.613 | 104  | 1  |
| HDAC inhibitor CDK expression enhancer ID1 expression inhibitor                                            | 0.225 | 0.001858 | 0.0049763 | 1.253 | 1.087 | 1.444 | 924  | 1  |
| CDK inhibitor PKC inhibitor                                                                                | 0.545 | 0.002998 | 0.007288  | 1.724 | 1.203 | 2.47  | 112  | 1  |
| CDC inhibitor                                                                                              | 0.499 | 0.003509 | 0.00797   | 1.646 | 1.178 | 2.301 | 134  | 5  |
| PKC inhibitor                                                                                              | 0.283 | 0.003581 | 0.00797   | 1.327 | 1.097 | 1.606 | 489  | 9  |
| T-type calcium channel blocker                                                                             | 0.514 | 0.005619 | 0.01153   | 1.672 | 1.162 | 2.405 | 112  | 3  |
| Retinoid receptor agonist                                                                                  | 0.264 | 0.006897 | 0.0135659 | 1.302 | 1.075 | 1.577 | 491  | 13 |
| Src inhibitor                                                                                              | 0.317 | 0.008101 | 0.0154219 | 1.373 | 1.086 | 1.737 | 313  | 8  |
| Protein synthesis inhibitor                                                                                | 0.269 | 0.008716 | 0.0162515 | 1.309 | 1.07  | 1.6   | 443  | 19 |
| CLK2 inhibitor                                                                                             | 0.444 | 0.008743 | 0.0162515 | 1.559 | 1.119 | 2.173 | 142  | 1  |

|                                                                                                                                   |       |              |               |       |       |       |     |    |
|-----------------------------------------------------------------------------------------------------------------------------------|-------|--------------|---------------|-------|-------|-------|-----|----|
| RNA polymerase inhibitor                                                                                                          | 0.408 | 0.012<br>272 | 0.02178<br>62 | 1.503 | 1.093 | 2.068 | 158 | 6  |
| Aurora kinase inhibitor Bcr-Abl kinase inhibitor FLT3 inhibitor JAK inhibitor                                                     | 0.294 | 0.015<br>941 | 0.02623<br>69 | 1.342 | 1.056 | 1.704 | 307 | 1  |
| DNA synthesis inhibitor                                                                                                           | 0.343 | 0.028<br>931 | 0.04260<br>86 | 1.409 | 1.036 | 1.917 | 178 | 10 |
| NFkB pathway inhibitor                                                                                                            | 0.212 | 0.032<br>493 | 0.04541<br>22 | 1.236 | 1.018 | 1.5   | 496 | 15 |
| Tubulin inhibitor                                                                                                                 | 0.182 | 0.035<br>295 | 0.04754<br>36 | 1.2   | 1.013 | 1.421 | 665 | 18 |
| Matrix metalloprotease inhibitor                                                                                                  | 0.365 | 0.048<br>328 | 0.05965<br>47 | 1.441 | 1.003 | 2.07  | 126 | 5  |
| PPAR receptor agonist Insulin sensitizer                                                                                          | 0.24  | 0.062<br>723 | 0.07340<br>89 | 1.271 | 0.987 | 1.637 | 285 | 6  |
| PPAR receptor agonist                                                                                                             | 0.254 | 0.063<br>851 | 0.07363<br>79 | 1.29  | 0.985 | 1.687 | 249 | 15 |
| Microtubule inhibitor Tubulin inhibitor                                                                                           | 0.327 | 0.069<br>104 | 0.07739<br>55 | 1.387 | 0.975 | 1.973 | 137 | 2  |
| Nucleophosmin inhibitor                                                                                                           | 0.318 | 0.069<br>558 | 0.07739<br>55 | 1.375 | 0.975 | 1.939 | 145 | 7  |
| RAF inhibitor FLT3 inhibitor KIT inhibitor PDGFR tyrosine kinase receptor inhibitor RET tyrosine kinase inhibitor VEGFR inhibitor | 0.268 | 0.071<br>671 | 0.07918<br>88 | 1.308 | 0.977 | 1.751 | 209 | 1  |
| HMGCR inhibitor                                                                                                                   | 0.216 | 0.073<br>729 | 0.08089<br>75 | 1.241 | 0.979 | 1.573 | 330 | 11 |
| MTOR inhibitor DNA dependent protein kinase inhibitor Phosphodiesterase inhibitor PLK inhibitor                                   | 0.235 | 0.092<br>521 | 0.09355<br>14 | 1.265 | 0.962 | 1.662 | 244 | 1  |

**Supplementary Table 4. MOA enrichment of disease characterizing signature of LAM2<sub>joint-cluster16</sub>.**  
Categories are selected with at least 100 signatures.

| MOA                                                                                                  | Estimate | PValue   | FDR      | OR    | 95% lower | 95% upper | No. of signatures | No. of compounds |
|------------------------------------------------------------------------------------------------------|----------|----------|----------|-------|-----------|-----------|-------------------|------------------|
| HDAC inhibitor                                                                                       | 1.051    | 0        | 0        | 2.861 | 2.709     | 3.02      | 2947              | 41               |
| HDAC inhibitor CDK expression enhancer ID1 expression inhibitor                                      | 1.606    | 0        | 0        | 4.981 | 4.582     | 5.415     | 924               | 1                |
| NFkB pathway inhibitor Proteasome inhibitor                                                          | 1.671    | 0        | 0        | 5.317 | 5.009     | 5.643     | 2214              | 1                |
| Proteasome inhibitor                                                                                 | 1.593    | 0        | 0        | 4.92  | 4.643     | 5.214     | 2345              | 5                |
| IKK inhibitor                                                                                        | 0.618    | 2.72E-32 | 4.67E-31 | 1.856 | 1.675     | 2.056     | 926               | 7                |
| Glutathione transferase inhibitor                                                                    | 1.318    | 5.29E-29 | 7.58E-28 | 3.736 | 2.965     | 4.708     | 108               | 2                |
| BTK inhibitor Cytoplasmic tyrosine protein kinase inhibitor BMX inhibitor                            | 0.885    | 3.11E-17 | 3.34E-16 | 2.423 | 1.973     | 2.976     | 184               | 1                |
| Anti-inflammatory agent Antioxidant HSP inhibitor NFkB pathway inhibitor Topoisomerase inhibitor     | 0.927    | 1.63E-16 | 1.55E-15 | 2.526 | 2.027     | 3.149     | 155               | 1                |
| Farnesyltransferase inhibitor NFkB pathway inhibitor                                                 | 0.964    | 3.54E-16 | 3.04E-15 | 2.623 | 2.08      | 3.307     | 136               | 1                |
| Topoisomerase inhibitor                                                                              | 0.367    | 1.69E-13 | 1.32E-12 | 1.443 | 1.309     | 1.591     | 1229              | 22               |
| CLK2 inhibitor                                                                                       | 0.845    | 2.74E-12 | 1.96E-11 | 2.327 | 1.836     | 2.949     | 142               | 1                |
| JNK inhibitor                                                                                        | 0.41     | 1.27E-07 | 6.45E-07 | 1.506 | 1.294     | 1.753     | 482               | 6                |
| CDK inhibitor Cell cycle inhibitor MCL1 inhibitor                                                    | 0.597    | 1.11E-06 | 5.29E-06 | 1.816 | 1.429     | 2.309     | 166               | 1                |
| Mitochondrial DNA polymerase inhibitor Phosphatase inhibitor                                         | 0.661    | 5.85E-06 | 2.33E-05 | 1.937 | 1.455     | 2.578     | 111               | 1                |
| CDK inhibitor                                                                                        | 0.204    | 5.96E-06 | 2.33E-05 | 1.226 | 1.122     | 1.339     | 1701              | 15               |
| NFkB pathway inhibitor                                                                               | 0.35     | 7.61E-06 | 2.73E-05 | 1.419 | 1.217     | 1.653     | 496               | 15               |
| Nucleophosmin inhibitor                                                                              | 0.582    | 9.8E-06  | 3.37E-05 | 1.79  | 1.383     | 2.317     | 145               | 7                |
| Histone acetyltransferase inhibitor                                                                  | 0.59     | 4.03E-05 | 0.000133 | 1.803 | 1.361     | 2.389     | 121               | 2                |
| CDC inhibitor                                                                                        | 0.555    | 6.09E-05 | 0.000187 | 1.741 | 1.328     | 2.283     | 134               | 5                |
| KIT inhibitor Src inhibitor Bcr-Abl kinase inhibitor Ephrin inhibitor PDGFR tyrosine kinase receptor | 0.278    | 6.34E-05 | 0.000188 | 1.321 | 1.152     | 1.514     | 662               | 1                |



|                                                                                                            |       |          |          |       |       |       |      |    |
|------------------------------------------------------------------------------------------------------------|-------|----------|----------|-------|-------|-------|------|----|
| inhibitor Tyrosine kinase inhibitor                                                                        |       |          |          |       |       |       |      |    |
| Leucine rich repeat kinase inhibitor                                                                       | 0.467 | 8.11E-05 | 0.000232 | 1.595 | 1.264 | 2.011 | 196  | 1  |
| HSP inhibitor                                                                                              | 0.162 | 0.000169 | 0.000441 | 1.176 | 1.081 | 1.28  | 1904 | 14 |
| Histone lysine methyltransferase inhibitor                                                                 | 0.514 | 0.000269 | 0.00068  | 1.671 | 1.268 | 2.203 | 133  | 5  |
| JAK inhibitor FLT3 inhibitor                                                                               | 0.402 | 0.00146  | 0.003393 | 1.494 | 1.167 | 1.914 | 181  | 1  |
| T-type calcium channel blocker                                                                             | 0.464 | 0.003008 | 0.006633 | 1.59  | 1.171 | 2.161 | 112  | 3  |
| Adenylyl cyclase activator                                                                                 | 0.425 | 0.005147 | 0.010294 | 1.53  | 1.136 | 2.062 | 122  | 2  |
| Cyclooxygenase inhibitor Histone acetyltransferase inhibitor Lipoxygenase inhibitor NFkB pathway inhibitor | 0.272 | 0.039503 | 0.054795 | 1.313 | 1.013 | 1.701 | 182  | 1  |
| Leucine rich repeat kinase inhibitor MAP kinase inhibitor                                                  | 0.294 | 0.050196 | 0.065078 | 1.342 | 1     | 1.802 | 138  | 1  |
| CHK inhibitor                                                                                              | 0.179 | 0.080726 | 0.087879 | 1.196 | 0.978 | 1.461 | 327  | 3  |
| Protein synthesis inhibitor                                                                                | 0.149 | 0.093682 | 0.094784 | 1.161 | 0.975 | 1.382 | 443  | 19 |

**Supplementary Table 5. MOA enrichment of disease characterizing pseudo-bulk signature of LAM1.**  
Categories are selected with at least 100 signatures.

| MOA                                                                       | Estimate | PValue   | FDR      | OR    | 95% lower | 95% upper | No. of signatures | No. of compounds |
|---------------------------------------------------------------------------|----------|----------|----------|-------|-----------|-----------|-------------------|------------------|
| NFkB pathway inhibitor Proteasome inhibitor                               | 0.588    | 0        | 0        | 1.801 | 1.775     | 1.828     | 2214              | 1                |
| Proteasome inhibitor                                                      | 0.55     | 0        | 0        | 1.733 | 1.709     | 1.758     | 2345              | 5                |
| HDAC inhibitor CDK expression enhancer ID1 expression inhibitor           | 0.23     | 2.6E-94  | 6.68E-93 | 1.258 | 1.231     | 1.286     | 924               | 1                |
| Protein synthesis inhibitor                                               | 0.282    | 8.89E-92 | 1.71E-90 | 1.326 | 1.29      | 1.362     | 443               | 19               |
| ATPase inhibitor                                                          | 0.252    | 1.37E-74 | 2.12E-73 | 1.287 | 1.253     | 1.322     | 515               | 26               |
| IKK inhibitor                                                             | 0.198    | 2.85E-61 | 3.14E-60 | 1.219 | 1.19      | 1.248     | 926               | 7                |
| BTK inhibitor Cytoplasmic tyrosine protein kinase inhibitor BMX inhibitor | 0.303    | 2E-52    | 1.72E-51 | 1.354 | 1.302     | 1.408     | 184               | 1                |

|                                                                                                  |       |          |          |       |       |       |      |    |
|--------------------------------------------------------------------------------------------------|-------|----------|----------|-------|-------|-------|------|----|
| Farnesyltransferase inhibitor NFkB pathway inhibitor                                             | 0.293 | 6.77E-36 | 4.74E-35 | 1.341 | 1.281 | 1.404 | 136  | 1  |
| HDAC inhibitor                                                                                   | 0.108 | 5.59E-35 | 3.59E-34 | 1.114 | 1.095 | 1.134 | 2947 | 41 |
| Glutathione transferase inhibitor                                                                | 0.307 | 9.97E-34 | 5.91E-33 | 1.36  | 1.294 | 1.429 | 108  | 2  |
| Mitochondrial DNA polymerase inhibitor Phosphatase inhibitor                                     | 0.287 | 5.72E-28 | 2.94E-27 | 1.333 | 1.266 | 1.403 | 111  | 1  |
| Anti-inflammatory agent Antioxidant HSP inhibitor NFkB pathway inhibitor Topoisomerase inhibitor | 0.261 | 7.75E-28 | 3.73E-27 | 1.298 | 1.238 | 1.36  | 155  | 1  |
| PKC activator                                                                                    | 0.178 | 9.66E-15 | 3.54E-14 | 1.195 | 1.143 | 1.251 | 261  | 4  |
| JAK inhibitor Lipocortin synthesis stimulant STAT inhibitor                                      | 0.234 | 3.49E-14 | 1.22E-13 | 1.264 | 1.19  | 1.343 | 104  | 1  |
| NFkB pathway inhibitor                                                                           | 0.136 | 7.25E-13 | 2.43E-12 | 1.146 | 1.104 | 1.189 | 496  | 15 |
| CDC inhibitor                                                                                    | 0.187 | 1.95E-09 | 6.01E-09 | 1.206 | 1.134 | 1.282 | 134  | 5  |
| Histone lysine methyltransferase inhibitor                                                       | 0.185 | 3.61E-09 | 1.07E-08 | 1.204 | 1.132 | 1.28  | 133  | 5  |
| Histone acetyltransferase inhibitor                                                              | 0.149 | 4.71E-05 | 0.000104 | 1.16  | 1.08  | 1.247 | 121  | 2  |
| IKK inhibitor NFkB pathway inhibitor                                                             | 0.152 | 6.46E-05 | 0.000138 | 1.164 | 1.081 | 1.255 | 109  | 1  |
| T-type calcium channel blocker                                                                   | 0.141 | 0.000273 | 0.000553 | 1.152 | 1.067 | 1.243 | 112  | 3  |
| HSP inhibitor                                                                                    | 0.043 | 0.000624 | 0.001202 | 1.044 | 1.019 | 1.071 | 1904 | 14 |
| Serine/threonine kinase inhibitor                                                                | 0.094 | 0.001467 | 0.002627 | 1.098 | 1.037 | 1.164 | 257  | 6  |
| Nucleophosmin inhibitor                                                                          | 0.109 | 0.003621 | 0.006062 | 1.115 | 1.036 | 1.2   | 145  | 7  |
| Leucine rich repeat kinase inhibitor                                                             | 0.092 | 0.006877 | 0.011031 | 1.096 | 1.026 | 1.171 | 196  | 1  |
| Retinoid receptor agonist                                                                        | 0.057 | 0.016584 | 0.026061 | 1.059 | 1.01  | 1.109 | 491  | 13 |
| LCK Inhibitor                                                                                    | 0.085 | 0.026646 | 0.040063 | 1.089 | 1.01  | 1.173 | 160  | 1  |
| CLK2 inhibitor                                                                                   | 0.089 | 0.027056 | 0.040063 | 1.093 | 1.01  | 1.182 | 142  | 1  |
| DNA synthesis inhibitor                                                                          | 0.074 | 0.046431 | 0.063843 | 1.077 | 1.001 | 1.159 | 178  | 10 |
| Cyclooxygenase inhibitor Histone acetyltransferase inhibitor Lipoxygenase                        | 0.07  | 0.063003 | 0.079337 | 1.072 | 0.996 | 1.154 | 182  | 1  |

|                                          |       |              |              |       |       |       |     |    |
|------------------------------------------|-------|--------------|--------------|-------|-------|-------|-----|----|
| inhibitor NFkB pathway inhibitor         |       |              |              |       |       |       |     |    |
| PLK inhibitor                            | 0.033 | 0.0637<br>18 | 0.0793<br>37 | 1.034 | 0.998 | 1.071 | 985 | 5  |
| DNA replication inhibitor STAT inhibitor | 0.077 | 0.0664<br>79 | 0.0812<br>52 | 1.08  | 0.995 | 1.173 | 138 | 1  |
| Adenosine receptor antagonist            | 0.069 | 0.0812<br>53 | 0.0898<br>61 | 1.072 | 0.991 | 1.159 | 162 | 15 |

**Supplementary Table 6. MOA enrichment of disease characterizing pseudo-bulk signature of LAM2.**  
Categories are selected with at least 100 signatures.

## References

1. Li, C. *et al.* Tuberlin Regulates Prostaglandin Receptor–Mediated Viability, via Rheb, in mTORC1-Hyperactive Cells. *Mol. Cancer Res.* **15**, 1318–1330 (2017).
2. Hoon, V., Thung, S. N., Kaneko, M. & Unger, P. D. HMB-45 reactivity in renal angiomyolipoma and lymphangioleiomyomatosis. *Arch. Pathol. Lab. Med.* **118**, 732–734 (1994).
3. Guo, M. *et al.* Single Cell Transcriptomic Analysis Identifies a Unique Pulmonary Lymphangioleiomyomatosis Cell. *Am. J. Respir. Crit. Care Med.* (2020).
4. Chilosi, M. *et al.* Cathepsin-k expression in pulmonary lymphangioleiomyomatosis. *Mod. Pathol.* **22**, 161–166 (2009).
5. Zhe, X. & Schuger, L. Combined smooth muscle and melanocytic differentiation in lymphangioleiomyomatosis. *J. Histochem. Cytochem.* **52**, 1537–1542 (2004).
6. Matsui, K. *et al.* Association of lymphangioleiomyomatosis (LAM) with endosalpingiosis in the retroperitoneal lymph nodes: report of two cases. *Int. J. Surg. Pathol.* **9**, 155–162 (2001).
7. Seyama, K. *et al.* Vascular endothelial growth factor-D is increased in serum of patients with lymphangioleiomyomatosis. *Lymphat. Res. Biol.* **4**, 143–152 (2006).
8. Taveira-DaSilva, A. M., Steagall, W. K. & Moss, J. Lymphangioleiomyomatosis. *Cancer Control* **13**, 276–285 (2006).
9. Iwaki, T. & Tateishi, J. Immunohistochemical demonstration of alphaB-crystallin in hamartomas of tuberous sclerosis. *Am. J. Pathol.* **139**, 1303 (1991).
