# Supplementary material for: Connectivity Map Analysis of a Single-Cell RNA-Sequencing -Derived Transcriptional Signature of mTOR Signaling
Source: Int J Mol Sci. 2021 Apr 22;22(9):4371. doi: 10.3390/ijms22094371 (PMC8122562; doi:10.3390/ijms22094371)
Supplement: Supplementary file 1 [file ijms-22-04371-s001.zip › Supplemental_Tables.xlsx]

## Sheet: LAM1 Clusterwise Marker Genes
Cluster	Top200_Genes
LAM1: Cluster0	SFTPC,SFTPA1,SFTPB,NPC2,SFTPA2,NAPSA,SFTPD,CTSH,SFTA2,DBI,SLPI,PEBP4,PGC,CITED2,SFTA3,MGST1,HOPX,LAMP3,SLC34A2,CYB5A,MUC1,CXCL17,AK1,C16orf89,WIF1,CLDN7,AQP3,PIGR,DCXR,C8orf4,MLPH,NNMT,SEPP1,FGGY,SELENBP1,MRPL14,SDR16C5,C4BPA,MBIP,SDC4,C2,COX14,MTHFS,MID1IP1,CLDN18,C11orf96,ELF3,MALL,ATP1B1,MFSD2A,MSMO1,PEBP1,CPM,ABCA3,S100A14,NKX2-1,TFPI,CEBPD,CSF3R,WFDC2,CD36,LRRK2,SDC2,CA2,CISH,SPTSSA,CHI3L2,H…
LAM1: Cluster1	C1QB,C1QA,FTL,APOC1,MARCO,S100A11,TKT,TYROBP,FABP4,VSIG4,LGALS3,ALDH2,C1QC,FBP1,CTSD,FTH1,GRN,MS4A7,CD68,GCHFR,ACP5,HLA-DPA1,APOE,LPL,CXCL16,ETHE1,HDDC2,C19orf59,HP,HLA-DPB1,TSPO,ALOX5AP,CTSC,CD74,LTA4H,HLA-DRB5,HLA-DRB1,HLA-DMA,UBB,HLA-DRA,TREM1,FCGRT,PCOLCE2,LYZ,PLD3,SPI1,AIF1,CES1,ECHDC1,HLA-DQA1,HLA-DMB,SERPING1,CSTA,SERPINA1,OLR1,PYCARD,CYP27A1,AKR1B1,HLA-DQB1,ABHD5,CAPG,S100A9,CST3,FCER1G,C…
LAM1: Cluster2	C1QB,C1QA,APOC1,FTL,FBP1,S100A11,C1QC,ETHE1,MARCO,GRN,TSPO,LPL,TYROBP,CTSD,HLA-DPA1,COMT,HLA-DRB5,LGALS3,GCHFR,CD68,CXCL16,FABP4,C19orf59,HLA-DRB1,ACP5,FTH1,HLA-DMA,VSIG4,MS4A7,INHBA,ALDH2,HLA-DPB1,CD74,APOE,CTSC,CYP27A1,FCGRT,BSG,HLA-DQA1,SPI1,HP,TREM1,MSR1,CSTB,PLD3,HLA-DMB,MS4A4A,ALOX5AP,CISD3,PHLDA3,HLA-DRA,OLR1,ATP6V0B,BLVRA,PTPMT1,FCGR3A,PCOLCE2,COLEC12,LTA4H,FDX1,HLA-DQB1,TKT,CAPG,RAB5C,AI…
LAM1: Cluster3	SFTPC,SFTPA1,NPC2,NAPSA,SFTPB,SFTPA2,SFTPD,CTSH,DBI,SFTA2,PEBP4,MTHFS,PGC,SLPI,CITED2,HOPX,LAMP3,MRPL14,SLC34A2,MGST1,SFTA3,C11orf96,SDR16C5,CYB5A,C16orf89,SERPINA1,CXCL17,AQP3,WIF1,TGIF1,DCXR,SDC4,TOP1,AK1,MUC1,SGMS2,CLDN7,CXCL2,MSMO1,ELF3,C4BPA,TIPARP,FGGY,NNMT,MFSD2A,C8orf4,SELENBP1,CHI3L2,SERPINB1,C2,CEBPD,SEPP1,PHLDA2,SPTSSA,SLC39A8,MLPH,CHCHD7,MBIP,SOCS2,PIGR,ABCA3,CLDN18,MALL,CSF3R,PTPN2,S…
LAM1: Cluster4	LPL,APOC1,SCD,C1QA,FTL,CEBPA,C1QB,EML4,ACSL1,MT-ND2,SLC7A8,ANKRD28,MT-ND1,S100A11,INHBA,ABHD5,SORT1,TYROBP,ACO1,CSTB,PLD3,RBM47,CD74,C1QC,FABP4,MARCO,GRN,IL1RAP,CTSC,APOE,PTPN12,IDH1,ACP5,HLA-DPA1,POR,CXCL16,HLA-DRA,HLA-DRB1,MS4A7,CTSD,MAFB,COLEC12,LYZ,HLA-DOA,SERPING1,CEBPB,MT-CO1,FBP1,GLDN,CD81,ALDH2,PSAP,CNDP2,HLA-DMA,SPI1,LGALS3BP,RREB1,HMOX1,QSOX1,SLC19A3,SLC16A10,LRRFIP1,CES1,HLA-DPB1,GGA2,…
LAM1: Cluster5	FTL,APOC1,C1QA,LPL,C1QB,CEBPA,TYROBP,EML4,FABP4,S100A11,ABHD5,HLA-DPA1,APOE,HLA-DRA,TKT,CD74,C1QC,MS4A7,FTH1,FBP1,ALDH2,LGALS3,CSTB,LYZ,HLA-DRB1,MARCO,HLA-DPB1,HLA-DMA,ACP5,HLA-DRB5,CES1,LTA4H,CST3,PLD3,CXCL16,IDH1,GPX1,HP,PTPMT1,CTSC,FCER1G,CEBPB,CTSD,GCHFR,SERPING1,GRN,HLA-DQB1,SERPINA1,HDDC2,HLA-DOA,HLA-DQA1,MAFB,NUPR1,AIF1,CD52,OLR1,ADAM17,LGALS3BP,PHLDA3,DAB2,SMCO4,MSR1,CSTA,TSPO,S100A9,GPCP…
LAM1: Cluster6	AGER,CD47,SFTPB,CLDN7,CEACAM6,SFTA2,CTSE,TNNC1,CYB5A,HOPX,GPRC5A,NPC2,CTSH,MGST1,FXYD3,KRT7,CPM,ATP1B1,SFTA3,MRPL14,DCXR,SLPI,ERRFI1,CYP4B1,AQP3,PHLDA2,PEBP4,FOLR1,MPZL2,MSLN,MRPS25,C19orf33,SLC34A2,CAV1,S100A2,SDC4,MID1IP1,WFDC2,SCGB3A2,CLDN18,MBIP,ELF3,SFTPD,WBP5,TACSTD2,MUC1,SUSD2,NGFRAP1,RNASE1,GKN2,MS4A15,AQP4,SFN,LMO7,DRAM1,RHOBTB2,SPINT1,CAV2,KLK11,MIR205HG,SFTA1P,KRT19,NAPSA,CXCL17,KRT18,…
LAM1: Cluster7	LGMN,MAFB,FPR3,SDS,PLA2G7,S100A9,CCL13,HLA-DPB1,FOLR2,FCGR2B,HMOX1,ADORA3,C15orf48,HLA-DRA,F13A1,MS4A6A,HLA-DPA1,RGS1,NPL,CD14,HLA-DRB1,HLA-DRB5,CD74,HLA-DMA,DAB2,GPR183,RNASE6,CCL17,CLEC10A,RGS2,S100B,HLA-DQB1,FCN1,TGFBI,GPX1,EIF4A1,LILRB4,FBP1,RAP2B,PLD3,IDH1,CSF1R,SPRED1,S100A8,SLC43A2,CD83,MAP3K8,SGK1,TYROBP,RBM47,ABCA1,CREG1,RNASE1,HLA-DQA1,FGL2,CST3,UPP1,CMTM6,PMP22,AP1S2,CORO1A,STAB1,HLA-D…
LAM1: Cluster8	CCL21,GNG11,MMRN1,IGFBP7,EGFL7,IGF1,CLDN5,PPFIBP1,HYAL2,PDPN,BCAT1,FILIP1L,ECSCR,PROX1,FN1,RAMP2,AKAP12,CXorf36,FLT4,SHC1,CALD1,LYVE1,SEMA3D,PTMS,SNCG,BCAR1,CALCRL,TM4SF18,FSCN1,CD36,NRP2,ADAMTS5,PODXL,STC1,RP11-14N7.2,TNXB,FXYD6,APOLD1,TFF3,LAMA4,KANK3,ADAMTS9,PCDH12,MGST2,TIE1,PDLIM1,PALM,ROBO4,FAM126A,C16orf62,NDRG1,CTTNBP2NL,ADAMTS4,OAF,AC011526.1,SCN3B,CYB5R3,HEBP1,COL6A2,HOXD8,EMP1,SEMA3A,S…
LAM1: Cluster9	S100A9,S100A8,FCN1,S100A12,VCAN,FPR1,CFP,LGALS2,MAFB,APOBEC3A,TKT,GCA,CD302,CD14,CD300E,ACSL1,RBP7,SELL,H3F3A,LILRA5,EREG,CLEC4E,RNASE2,MS4A6A,CDA,RPS24,NUP214,TNFSF13B,BCL2A1,RNASE6,LILRB2,THBS1,CORO1A,RGS2,FGR,AP1S2,BLVRB,IL1B,MXD1,CLEC4A,CLEC12A,CPVL,STXBP2,FGL2,MPEG1,LYZ,TLR2,CD48,CD93,ICAM3,C19orf38,FYB,PGLS,UPP1,LST1,RAB31,MNDA,AGTRAP,RILPL2,IL1R2,TMEM167A,CD36,KYNU,C10orf54,AQP9,CLEC7A,C14…
LAM1: Cluster10	CCL5,CD7,CD3E,CD3D,GZMA,CD2,NKG7,CD8A,GNLY,CD3G,CD8B,PRF1,KLRB1,GZMB,GZMH,KLRD1,CD247,GPR171,FGFBP2,RPS29,PTPRCAP,LCK,CST7,IL32,GZMK,CD69,CCL4,IL7R,CXCR4,SYTL3,LAG3,PTPRC,CORO1A,PRDM1,CD48,GIMAP7,ACAP1,ISG20,RGS1,CTSW,RAC2,LYAR,FYN,LEPROTL1,PSMB9,ETS1,PIK3IP1,HCST,SEPT1,RUNX3,TSC22D3,EVL,EMB,FYB,BTG1,FKBP11,DUSP2,LSP1,ITM2A,TBC1D10C,CD27,KLRF1,SLC38A1,PSME1,CYTIP,LIMD2,ID2,RPS15A,TRAF3IP3,CLEC2B,…
LAM1: Cluster11	RPA3,C14orf142,RSPH3,TCTN1,RABL2B,LRRC23,OCEL1,MYCBP,OSCP1,CC2D2A,PIFO,RSPH1,SPA17,C1orf194,MLF1,C5orf49,LRRIQ1,SLAIN2,FAM183A,HIPK1,DYX1C1,C9orf116,TMEM190,CCDC153,C9orf24,ALDH1A1,DYNC2LI1,C20orf85,CAPS,CCDC170,C5orf15,B9D2,MORN5,C9orf9,CDHR3,LZTFL1,C1orf173,C11orf74,IFT43,CCP110,DYNLRB2,SCAMP4,SLC44A4,ZMYND10,HSPH1,AC013264.2,IFT88,MS4A8,PPIL6,CDC16,FOXJ1,RABL5,C11orf88,CCDC78,DPY30,CCDC11,ST6G…
LAM1: Cluster12	CTSH,MID1IP1,FBP1,PEBP4,MRPL14,MBIP,DRAM1,LPL,MSMO1,CYB5A,PGC,MFSD2A,LAMP3,SFTA3,NPC2,CLDN18,FOLR1,SFTA2,HLA-DPA1,LPCAT1,CXCL16,WIF1,HLA-DQA1,LRRK2,WFDC2,SLC34A2,NNMT,HLA-DQB1,CES1,SDC4,SPTSSA,HLA-DRB1,FTL,HLA-DRA,PTP4A1,SFTPD,NAPSA,DCXR,GAA,FXYD3,HLA-DMB,GCHFR,MUC1,FGGY,PIGR,S100A14,HMOX1,C16orf89,HHIP,ABCA3,AK1,HLA-DMA,ALDH2,SFTPB,PHLDA3,CXCL2,SCGB3A2,MTHFS,NKX2-1,DHCR24,SLC39A8,C4BPA,RBP4,SFTP…
LAM1: Cluster13	TSPAN8,S100A2,SAA1,BPIFB1,KLK11,TMEM45A,CAPS,RHOV,CXCL6,CP,DUSP23,SERPINB3,LTF,SAA2,SERPINF1,MUC5B,TSPAN1,GSTA1,S100P,MSMB,CHST9,AQP5,WFDC2,MDK,HMGB3,MIR205HG,FAM3D,LCN2,CYP2F1,TF,CLCA2,KIAA1324,PPAP2C,TFF3,CEACAM6,SOX2,LRRC26,PLEKHS1,RP11-294O2.2,CXCL1,ST6GALNAC1,RARRES1,IGFBP3,TOB1,KRT19,SULT2B1,MUC4,SLC4A4,CYP4X1,SLC15A2,ALDH1A1,LY6D,SPINT1,CRISP3,ADAM28,SIX1,EFCAB4A,ZG16B,INSR,OAT,MS4A8,RP11-…
LAM1: Cluster14	CPA3,TPSAB1,RGS13,KIT,SLC18A2,RP11-354E11.2,NTM,C1orf186,HPGDS,IL1RL1,GATA2,FCER1A,AREG,CD69,LTC4S,BATF,RPL36AL,RGS1,CST7,VWA5A,NDUFA4,RGS2,TESC,LAPTM4A,RAC2,FDX1,GPR65,TNFRSF4,BIRC3,LMNA,ITM2C,HPGD,TMEM154,RPS29,SAMSN1,NSG1,PLIN2,CKLF,RHOBTB3,TNFRSF18,ID2,HEY1,CD44,TSC22D3,RHOH,SELK,RGS10,RENBP,ALAS1,ANKRD28,KCNMB1,BACE2,ITM2A,HAMP,AP3S1,ABRACL,PAK1,BEX4,CLU,PTGS2,IL2RA,SOCS1,IRS2,ACSL4,MSRA,PTM…
LAM1: Cluster15	MZB1,SSR3,DERL3,PIM2,JSRP1,IGLL5,FCRL5,SPAG4,CD79A,IGJ,FKBP11,CD38,AL928768.3,PPIB,DPEP1,SSR4,TMED9,TNFRSF17,ARSA,TMEM258,SERP1,C19orf10,CD27,LMAN2,GNG7,PDIA4,KDELR1,POU2AF1,DNAJB9,SEC61B,KDELR2,SLAMF7,PAIP2B,HLA-DOB,CREB3L2,DUSP5,VIMP,TMED10,KIAA0125,ITM2C,SDF2L1,ERGIC3,PPAPDC1B,ANKRD28,TNFRSF13B,TMEM156,TMEM59,PRDX4,RPN2,RP5-887A10.1,TXNDC15,CNPY2,CRELD2,P4HB,ERP29,OSTC,ISG20,TP53INP1,MANF,MEI1…
LAM1: Cluster16	DCN,CRYAB,LUM,ACTG2,TPM2,PMEL,PCP4,OGN,NEXN,TCF21,FBLN1,CTSK,PLN,MYH11,COL1A2,DES,COL6A3,MFAP4,MYLK,C1S,KCNC2,LMOD1,CRISPLD2,SOD3,SYNPO2,ADH1B,SPARCL1,CNN1,ACTA2,RAMP1,SMOC2,HTR2B,PRELP,PPP1R12B,PTGDS,S100A13,COL3A1,EMX2,NBL1,PCSK1N,PALLD,MRGPRF,C7,CALD1,PGM5-AS1,FXYD1,F10,MFGE8,COL6A2,AEBP1,RARRES2,A2M,SCN7A,BGN,DPT,COL6A1,MIR143HG,WFDC1,TMOD1,MMP2,BAG2,GPX3,C10orf10,CSRP2,MLTK,PLAC9,MYL9,FBXO32…
LAM1: Cluster17	EDN1,FAM107A,VWF,CLEC14A,FCN3,DARC,RAMP3,GJA5,PTGIS,SPARCL1,SELE,IL6,NPDC1,SOX17,CLDN5,SELP,TMEM100,MMRN2,VCAM1,SLCO2A1,AQP1,PTPRB,PCDH17,RAMP2,IGFBP3,ELTD1,SOX18,SOX7,C10orf10,CASKIN2,CALCRL,PIK3R3,LIFR,SRPX,AC011526.1,LRRC32,ESAM,MT1A,MT1M,GNG11,CDH5,ADAMTS9,PTGDS,S1PR1,IL33,NRN1,ADAMTS1,PDLIM1,EMCN,GPX3,CXCL12,HEG1,PODXL,HEY1,TIMP3,SLC9A3R2,CALD1,A2M,GATA2,LDB2,NES,RGS5,TSPAN7,PLVAP,MKL2,LEPR,…
LAM1: Cluster18	MS4A1,CD79A,VPREB3,RP5-887A10.1,BANK1,CD79B,AL928768.3,PTPRCAP,LTB,HLA-DOB,RPS29,ADAM28,CXCR4,SELL,CD27,TMEM156,CORO1A,SPIB,LIMD2,CD48,RPL30,KIAA0125,RAC2,RPS27,RPS23,CCR7,RPL27A,TRAF3IP3,MARCH1,RPS21,RPS25,RPS2,RPS15A,RPL19,SMIM14,RPLP2,CD69,FCRLA,RPL39,RPS11,RPS8,RPS16,MEF2C,ACAP1,RPL13A,RPS15,RPL27,RPSA,BTG1,RPL18A,RPSAP58,RPL23A,HLA-DRA,SP140,RPL26,EEF1B2,TSC22D3,RPS13,SEPT1,RPL32,RPL36,RPLP1…

## Sheet: LAM1 Clusterwise Enrichment
ID	Description	GeneRatio	BgRatio	pvalue	p.adjust	qvalue	geneID	Count	Enrichment	Cluster
hsa00100	KEGG:Steroid biosynthesis	5/101	20/8104	3.63791e-06	0.00064391	0.000601213	MSMO1/EBP/FDFT1/DHCR24/SQLE	5	KEGG	LAM1: Cluster0
hsa04610	KEGG:Complement and coagulation cascades	8/101	85/8104	9.60425e-06	0.000849976	0.000793614	C4BPA/C2/TFPI/FGG/SERPINF2/F3/C3/CPB2	8	KEGG	LAM1: Cluster0
hsa04964	KEGG:Proximal tubule bicarbonate reclamation	4/101	23/8104	0.000167757	0.00989769	0.00924137	ATP1B1/CA2/ATP1A1/AQP1	4	KEGG	LAM1: Cluster0
hsa04976	KEGG:Bile secretion	6/101	90/8104	0.00086334	0.0382028	0.0356696	ATP1B1/CA2/EPHX1/ATP1A1/AQP1/AQP4	6	KEGG	LAM1: Cluster0
hsa03320	KEGG:PPAR signaling pathway	5/101	76/8104	0.002498	0.0736909	0.0688045	DBI/CD36/FABP5/HMGCS1/ACADL	5	KEGG	LAM1: Cluster0
hsa05133	KEGG:Pertussis	5/101	76/8104	0.002498	0.0736909	0.0688045	SFTPA1/SFTPA2/C4BPA/C2/C3	5	KEGG	LAM1: Cluster0
hsa04979	KEGG:Cholesterol metabolism	4/101	50/8104	0.00337334	0.0852974	0.0796413	NPC2/CD36/VAPA/APOH	4	KEGG	LAM1: Cluster0
hsa00790	KEGG:Folate biosynthesis	3/101	26/8104	0.00396713	0.0877728	0.0819526	QDPR/PCBD1/ALPL	3	KEGG	LAM1: Cluster0
HALLMARK_CHOLESTEROL_HOMEOSTASIS	MSIGDB:CHOLESTEROL_HOMEOSTASIS	9/89	74/4384	1.45988e-05	0.000598552	0.000445648	EBP/FDFT1/FABP5/LGMN/TMEM97/FASN/MAL2/HMGCS1/SQLE	9	MSIGDB HALLMARK	LAM1: Cluster0
HALLMARK_ESTROGEN_RESPONSE_EARLY	MSIGDB:ESTROGEN_RESPONSE_EARLY	14/89	200/4384	3.95612e-05	0.000811004	0.000603828	MUC1/CLDN7/AQP3/MLPH/ELF3/ABCA3/CISH/FDFT1/XBP1/FASN/KRT18/KRT8/SFN/DLC1	14	MSIGDB HALLMARK	LAM1: Cluster0
HALLMARK_ANDROGEN_RESPONSE	MSIGDB:ANDROGEN_RESPONSE	9/89	100/4384	0.000163125	0.00168347	0.00125342	DBI/TSC22D1/AZGP1/H1-0/KRT8/STEAP4/DHCR24/VAPA/HMGCS1	9	MSIGDB HALLMARK	LAM1: Cluster0
HALLMARK_ESTROGEN_RESPONSE_LATE	MSIGDB:ESTROGEN_RESPONSE_LATE	13/89	200/4384	0.000164241	0.00168347	0.00125342	DCXR/ABCA3/CA2/CISH/FDFT1/FABP5/AGR2/CACNA2D2/GALE/XBP1/SFN/TSPAN13/BTG3	13	MSIGDB HALLMARK	LAM1: Cluster0
HALLMARK_COAGULATION	MSIGDB:COAGULATION	8/89	138/4384	0.00648232	0.053155	0.0395763	CTSH/C2/FGG/LGMN/F3/C3/CPB2/BMP1	8	MSIGDB HALLMARK	LAM1: Cluster0
HALLMARK_FATTY_ACID_METABOLISM	MSIGDB:FATTY_ACID_METABOLISM	8/89	158/4384	0.0141479	0.0966773	0.0719806	CD36/CA2/EPHX1/PCBD1/FASN/DHCR24/HMGCS1/ACADL	8	MSIGDB HALLMARK	LAM1: Cluster0
GO:0043129	GO:surfactant homeostasis	6/179	11/18670	3.17069e-10	8.24697e-07	7.33264e-07	SFTPA1/SFTPA2/NAPSA/SFTPD/CTSH/LPCAT1	6	GO	LAM1: Cluster0
GO:0048875	GO:chemical homeostasis within a tissue	6/179	13/18670	1.15906e-09	1.50736e-06	1.34024e-06	SFTPA1/SFTPA2/NAPSA/SFTPD/CTSH/LPCAT1	6	GO	LAM1: Cluster0
GO:0048871	GO:multicellular organismal homeostasis	19/179	485/18670	2.2315e-07	0.000193471	0.000172021	SFTPA1/SFTPA2/NAPSA/SFTPD/CTSH/AQP3/PIGR/CLDN18/CD36/CA2/LPCAT1/FABP5/AZGP1/AQP1/SFN/IRX3/IL20RA/AQP4/ACADL	19	GO	LAM1: Cluster0
GO:0031638	GO:zymogen activation	7/179	53/18670	7.03639e-07	0.000391437	0.000348039	CTSH/FGG/SERPINF2/LGMN/CPB2/DHCR24/APOH	7	GO	LAM1: Cluster0
GO:0052548	GO:regulation of endopeptidase activity	17/179	425/18670	7.52475e-07	0.000391437	0.000348039	CTSH/SLPI/LAMP3/PEBP1/TFPI/WFDC2/PRDX5/SERPINF2/LGMN/SPINT2/F3/C3/AQP1/SFN/DHCR24/DLC1/IFT57	17	GO	LAM1: Cluster0
GO:0052547	GO:regulation of peptidase activity	17/179	452/18670	1.74735e-06	0.00069698	0.000619707	CTSH/SLPI/LAMP3/PEBP1/TFPI/WFDC2/PRDX5/SERPINF2/LGMN/SPINT2/F3/C3/AQP1/SFN/DHCR24/DLC1/IFT57	17	GO	LAM1: Cluster0
GO:0008203	GO:cholesterol metabolic process	10/179	150/18670	1.87576e-06	0.00069698	0.000619707	NPC2/MSMO1/EBP/FDFT1/FASN/DHCR24/CAT/HMGCS1/SQLE/ACADL	10	GO	LAM1: Cluster0
GO:0045861	GO:negative regulation of proteolysis	15/179	363/18670	2.3291e-06	0.000729429	0.000648559	SLPI/LAMP3/C4BPA/PEBP1/TFPI/WFDC2/LRRK2/PRDX5/SERPINF2/SPINT2/C3/CPB2/AQP1/SFN/DHCR24	15	GO	LAM1: Cluster0
GO:1902652	GO:secondary alcohol metabolic process	10/179	155/18670	2.52398e-06	0.000729429	0.000648559	NPC2/MSMO1/EBP/FDFT1/FASN/DHCR24/CAT/HMGCS1/SQLE/ACADL	10	GO	LAM1: Cluster0
GO:0031639	GO:plasminogen activation	5/179	25/18670	3.48357e-06	0.000791056	0.000703353	FGG/SERPINF2/CPB2/DHCR24/APOH	5	GO	LAM1: Cluster0
GO:0016485	GO:protein processing	14/179	328/18670	3.52595e-06	0.000791056	0.000703353	CTSH/C4BPA/C2/CPM/LRRK2/FGG/SERPINF2/LGMN/F3/C3/CPB2/DHCR24/SEC11C/APOH	14	GO	LAM1: Cluster0
GO:0008202	GO:steroid metabolic process	14/179	331/18670	3.91685e-06	0.000791056	0.000703353	NPC2/MSMO1/EBP/FDFT1/LGMN/HSD17B6/FASN/ATP1A1/DHCR24/CAT/HMGCS1/SQLE/STARD3NL/ACADL	14	GO	LAM1: Cluster0
GO:0030194	GO:positive regulation of blood coagulation	5/179	26/18670	4.2796e-06	0.000791056	0.000703353	CD36/SERPINF2/F3/CPB2/APOH	5	GO	LAM1: Cluster0
GO:1900048	GO:positive regulation of hemostasis	5/179	26/18670	4.2796e-06	0.000791056	0.000703353	CD36/SERPINF2/F3/CPB2/APOH	5	GO	LAM1: Cluster0
GO:0016125	GO:sterol metabolic process	10/179	166/18670	4.66894e-06	0.000791056	0.000703353	NPC2/MSMO1/EBP/FDFT1/FASN/DHCR24/CAT/HMGCS1/SQLE/ACADL	10	GO	LAM1: Cluster0
GO:0019731	GO:antibacterial humoral response	6/179	46/18670	4.86616e-06	0.000791056	0.000703353	SFTPD/SLPI/PGC/H2BC12/PLA2G1B/DMBT1	6	GO	LAM1: Cluster0
GO:0050820	GO:positive regulation of coagulation	5/179	27/18670	5.21159e-06	0.000793779	0.000705774	CD36/SERPINF2/F3/CPB2/APOH	5	GO	LAM1: Cluster0
GO:0010951	GO:negative regulation of endopeptidase activity	12/179	250/18670	5.49328e-06	0.000793779	0.000705774	SLPI/LAMP3/PEBP1/TFPI/WFDC2/PRDX5/SERPINF2/SPINT2/C3/AQP1/SFN/DHCR24	12	GO	LAM1: Cluster0
GO:0035358	GO:regulation of peroxisome proliferator activated receptor signaling pathway	4/179	14/18670	7.58751e-06	0.000986923	0.000877505	CITED2/FABP5/ALOX15B/LMO3	4	GO	LAM1: Cluster0
GO:0006695	GO:cholesterol biosynthetic process	7/179	75/18670	7.5888e-06	0.000986923	0.000877505	MSMO1/EBP/FDFT1/FASN/DHCR24/HMGCS1/SQLE	7	GO	LAM1: Cluster0
GO:1902653	GO:secondary alcohol biosynthetic process	7/179	76/18670	8.29168e-06	0.00102698	0.000913123	MSMO1/EBP/FDFT1/FASN/DHCR24/HMGCS1/SQLE	7	GO	LAM1: Cluster0
GO:0010466	GO:negative regulation of peptidase activity	12/179	262/18670	8.83954e-06	0.00104507	0.000929209	SLPI/LAMP3/PEBP1/TFPI/WFDC2/PRDX5/SERPINF2/SPINT2/C3/AQP1/SFN/DHCR24	12	GO	LAM1: Cluster0
GO:0030193	GO:regulation of blood coagulation	7/179	79/18670	1.0732e-05	0.00121365	0.0010791	TFPI/CD36/FGG/SERPINF2/F3/CPB2/APOH	7	GO	LAM1: Cluster0
GO:1900046	GO:regulation of hemostasis	7/179	80/18670	1.16669e-05	0.0012644	0.00112422	TFPI/CD36/FGG/SERPINF2/F3/CPB2/APOH	7	GO	LAM1: Cluster0
GO:0001894	GO:tissue homeostasis	11/179	227/18670	1.24728e-05	0.00126731	0.00112681	SFTPA1/SFTPA2/NAPSA/SFTPD/CTSH/PIGR/CLDN18/CA2/LPCAT1/AZGP1/IL20RA	11	GO	LAM1: Cluster0
GO:0016126	GO:sterol biosynthetic process	7/179	81/18670	1.26682e-05	0.00126731	0.00112681	MSMO1/EBP/FDFT1/FASN/DHCR24/HMGCS1/SQLE	7	GO	LAM1: Cluster0
GO:0050818	GO:regulation of coagulation	7/179	84/18670	1.61081e-05	0.00155174	0.00137971	TFPI/CD36/FGG/SERPINF2/F3/CPB2/APOH	7	GO	LAM1: Cluster0
GO:0006694	GO:steroid biosynthetic process	10/179	196/18670	2.00537e-05	0.00186285	0.00165632	MSMO1/EBP/FDFT1/HSD17B6/FASN/ATP1A1/DHCR24/HMGCS1/SQLE/STARD3NL	10	GO	LAM1: Cluster0
GO:0046890	GO:regulation of lipid biosynthetic process	10/179	198/18670	2.1887e-05	0.00196303	0.0017454	MID1IP1/LPCAT1/FDFT1/FABP5/C3/FASN/ATP1A1/HMGCS1/SQLE/ACADL	10	GO	LAM1: Cluster0
GO:0090303	GO:positive regulation of wound healing	6/179	61/18670	2.56114e-05	0.00222051	0.00197432	CD36/SERPINF2/F3/CPB2/XBP1/APOH	6	GO	LAM1: Cluster0
GO:0051604	GO:protein maturation	14/179	397/18670	3.02539e-05	0.0025384	0.00225697	CTSH/C4BPA/C2/CPM/LRRK2/FGG/SERPINF2/LGMN/F3/C3/CPB2/DHCR24/SEC11C/APOH	14	GO	LAM1: Cluster0
GO:0019216	GO:regulation of lipid metabolic process	14/179	410/18670	4.29587e-05	0.00336335	0.00299046	NPC2/MID1IP1/CD36/CISH/LPCAT1/FDFT1/FABP5/C3/SOCS2/FASN/ATP1A1/HMGCS1/SQLE/ACADL	14	GO	LAM1: Cluster0
GO:0035357	GO:peroxisome proliferator activated receptor signaling pathway	4/179	21/18670	4.30451e-05	0.00336335	0.00299046	CITED2/FABP5/ALOX15B/LMO3	4	GO	LAM1: Cluster0
GO:0050764	GO:regulation of phagocytosis	7/179	98/18670	4.39654e-05	0.00336335	0.00299046	SFTPA1/SFTPA2/SFTPD/C4BPA/C2/CD36/C3	7	GO	LAM1: Cluster0
GO:0046165	GO:alcohol biosynthetic process	9/179	175/18670	4.9289e-05	0.00366287	0.00325678	MSMO1/QDPR/EBP/FDFT1/PCBD1/FASN/DHCR24/HMGCS1/SQLE	9	GO	LAM1: Cluster0
GO:0006066	GO:alcohol metabolic process	13/179	364/18670	5.14356e-05	0.00371622	0.00330421	NPC2/SDR16C5/MSMO1/QDPR/EBP/FDFT1/PCBD1/FASN/DHCR24/CAT/HMGCS1/SQLE/ACADL	13	GO	LAM1: Cluster0
GO:0050766	GO:positive regulation of phagocytosis	6/179	70/18670	5.63192e-05	0.00395909	0.00352015	SFTPA1/SFTPA2/SFTPD/C2/CD36/C3	6	GO	LAM1: Cluster0
GO:1903036	GO:positive regulation of response to wounding	6/179	74/18670	7.70942e-05	0.00527168	0.00468722	CD36/SERPINF2/F3/CPB2/XBP1/APOH	6	GO	LAM1: Cluster0
GO:0048732	GO:gland development	14/179	434/18670	7.90448e-05	0.00527168	0.00468722	CITED2/ELF3/NKX2-1/QDPR/CPB2/XBP1/SOCS2/ALOX15B/FGF7/NTN4/FASN/MPST/SLC46A2/HMGCS1	14	GO	LAM1: Cluster0
GO:0061041	GO:regulation of wound healing	8/179	148/18670	9.1899e-05	0.00597573	0.00531321	TFPI/CD36/FGG/SERPINF2/F3/CPB2/XBP1/APOH	8	GO	LAM1: Cluster0
GO:0051918	GO:negative regulation of fibrinolysis	3/179	10/18670	9.89735e-05	0.00627878	0.00558266	SERPINF2/CPB2/APOH	3	GO	LAM1: Cluster0
GO:2000116	GO:regulation of cysteine-type endopeptidase activity	10/179	239/18670	0.000106831	0.0066159	0.00588241	CTSH/LAMP3/PRDX5/LGMN/F3/AQP1/SFN/DHCR24/DLC1/IFT57	10	GO	LAM1: Cluster0
GO:0072378	GO:blood coagulation, fibrin clot formation	4/179	27/18670	0.000120677	0.00729957	0.00649028	TFPI/FGG/F3/APOH	4	GO	LAM1: Cluster0
GO:0040015	GO:negative regulation of multicellular organism growth	3/179	11/18670	0.000135129	0.00798798	0.00710236	LGMN/SOCS2/GDF15	3	GO	LAM1: Cluster0
GO:0042730	GO:fibrinolysis	4/179	28/18670	0.000139741	0.00807702	0.00718154	FGG/SERPINF2/CPB2/APOH	4	GO	LAM1: Cluster0
GO:0030195	GO:negative regulation of blood coagulation	5/179	53/18670	0.000151451	0.00856356	0.00761413	TFPI/FGG/SERPINF2/CPB2/APOH	5	GO	LAM1: Cluster0
GO:1900047	GO:negative regulation of hemostasis	5/179	54/18670	0.00016562	0.00902381	0.00802336	TFPI/FGG/SERPINF2/CPB2/APOH	5	GO	LAM1: Cluster0
GO:0051346	GO:negative regulation of hydrolase activity	14/179	466/18670	0.000166529	0.00902381	0.00802336	SLPI/LAMP3/PEBP1/TFPI/WFDC2/LRRK2/PRDX5/SERPINF2/SPINT2/C3/PPP1R1B/AQP1/SFN/DHCR24	14	GO	LAM1: Cluster0
GO:0019730	GO:antimicrobial humoral response	7/179	122/18670	0.000175603	0.00930651	0.00827472	SFTPD/SLPI/PGC/H2BC12/PLA2G1B/DMBT1/CXCL2	7	GO	LAM1: Cluster0
GO:0019755	GO:one-carbon compound transport	3/179	12/18670	0.000178903	0.00930651	0.00827472	AQP3/CA2/AQP1	3	GO	LAM1: Cluster0
GO:0050819	GO:negative regulation of coagulation	5/179	57/18670	0.000214254	0.010927	0.00971552	TFPI/FGG/SERPINF2/CPB2/APOH	5	GO	LAM1: Cluster0
GO:0043281	GO:regulation of cysteine-type endopeptidase activity involved in apoptotic process	9/179	215/18670	0.000235895	0.0117993	0.0104911	CTSH/LAMP3/PRDX5/F3/AQP1/SFN/DHCR24/DLC1/IFT57	9	GO	LAM1: Cluster0
GO:0051917	GO:regulation of fibrinolysis	3/179	14/18670	0.000291848	0.0143226	0.0127347	SERPINF2/CPB2/APOH	3	GO	LAM1: Cluster0
GO:0042558	GO:pteridine-containing compound metabolic process	4/179	34/18670	0.000302636	0.014577	0.0129608	MTHFS/FOLR1/QDPR/PCBD1	4	GO	LAM1: Cluster0
GO:0007585	GO:respiratory gaseous exchange	5/179	62/18670	0.000318585	0.0150662	0.0133958	SFTPC/SFTPA1/SFTPB/SFTPA2/SFTPD	5	GO	LAM1: Cluster0
GO:0006631	GO:fatty acid metabolic process	12/179	383/18670	0.000335851	0.0153993	0.013692	MID1IP1/MSMO1/CD36/FABP5/PLA2G1B/C3/XBP1/ALOX15B/FASN/ECHDC2/PON2/ACADL	12	GO	LAM1: Cluster0
GO:1903034	GO:regulation of response to wounding	8/179	179/18670	0.000338673	0.0153993	0.013692	TFPI/CD36/FGG/SERPINF2/F3/CPB2/XBP1/APOH	8	GO	LAM1: Cluster0
GO:0090181	GO:regulation of cholesterol metabolic process	5/179	63/18670	0.00034339	0.0153993	0.013692	FDFT1/FASN/HMGCS1/SQLE/ACADL	5	GO	LAM1: Cluster0
GO:0042559	GO:pteridine-containing compound biosynthetic process	3/179	15/18670	0.000362243	0.0159694	0.0141989	MTHFS/QDPR/PCBD1	3	GO	LAM1: Cluster0
GO:0002224	GO:toll-like receptor signaling pathway	7/179	146/18670	0.000524587	0.0227409	0.0202196	SFTPA1/SFTPA2/SFTPD/S100A14/CD36/FGG/LGMN	7	GO	LAM1: Cluster0
GO:0010955	GO:negative regulation of protein processing	4/179	41/18670	0.000627238	0.0255956	0.0227578	C4BPA/LRRK2/SERPINF2/CPB2	4	GO	LAM1: Cluster0
GO:1903318	GO:negative regulation of protein maturation	4/179	41/18670	0.000627238	0.0255956	0.0227578	C4BPA/LRRK2/SERPINF2/CPB2	4	GO	LAM1: Cluster0
GO:0045056	GO:transcytosis	3/179	18/18670	0.000636042	0.0255956	0.0227578	PIGR/MFSD2A/MAL2	3	GO	LAM1: Cluster0
GO:0090026	GO:positive regulation of monocyte chemotaxis	3/179	18/18670	0.000636042	0.0255956	0.0227578	CXCL17/S100A14/LGMN	3	GO	LAM1: Cluster0
GO:0002221	GO:pattern recognition receptor signaling pathway	8/179	197/18670	0.000639643	0.0255956	0.0227578	SFTPA1/SFTPA2/SFTPD/S100A14/CD36/FGG/LGMN/DMBT1	8	GO	LAM1: Cluster0
GO:0072376	GO:protein activation cascade	8/179	198/18670	0.000661219	0.0256461	0.0228028	C4BPA/C2/TFPI/FGG/F3/C3/CPB2/APOH	8	GO	LAM1: Cluster0
GO:0006959	GO:humoral immune response	11/179	356/18670	0.000665577	0.0256461	0.0228028	SFTPD/SLPI/PGC/C4BPA/C2/H2BC12/PLA2G1B/C3/CPB2/DMBT1/CXCL2	11	GO	LAM1: Cluster0
GO:0046486	GO:glycerolipid metabolic process	12/179	414/18670	0.000670486	0.0256461	0.0228028	DBI/MFSD2A/CISH/LPCAT1/FABP5/PLA2G1B/C3/SOCS2/CAT/SH3YL1/PTPN13/APOH	12	GO	LAM1: Cluster0
GO:0045807	GO:positive regulation of endocytosis	7/179	153/18670	0.0006932	0.0261306	0.0232336	SFTPA1/SFTPA2/SFTPD/C2/CD36/LRRK2/C3	7	GO	LAM1: Cluster0
GO:0006833	GO:water transport	3/179	19/18670	0.000749994	0.0278676	0.024778	AQP3/AQP1/AQP4	3	GO	LAM1: Cluster0
GO:0061045	GO:negative regulation of wound healing	5/179	76/18670	0.00081657	0.0299141	0.0265975	TFPI/FGG/SERPINF2/CPB2/APOH	5	GO	LAM1: Cluster0
GO:1902236	GO:negative regulation of endoplasmic reticulum stress-induced intrinsic apoptotic signaling pathway	3/179	20/18670	0.00087615	0.0316509	0.0281418	LRRK2/XBP1/CREB3L1	3	GO	LAM1: Cluster0
GO:0006644	GO:phospholipid metabolic process	12/179	430/18670	0.000931835	0.0332014	0.0295204	DBI/MFSD2A/NKX2-1/CISH/LPCAT1/FDFT1/FABP5/PLA2G1B/SOCS2/HMGCS1/SH3YL1/PTPN13	12	GO	LAM1: Cluster0
GO:0043277	GO:apoptotic cell clearance	4/179	46/18670	0.000973787	0.0342273	0.0304326	C2/CD36/RHOBTB2/C3	4	GO	LAM1: Cluster0
GO:0006633	GO:fatty acid biosynthetic process	7/179	164/18670	0.00104216	0.0361421	0.032135	MID1IP1/FABP5/PLA2G1B/XBP1/ALOX15B/FASN/ACADL	7	GO	LAM1: Cluster0
GO:0060249	GO:anatomical structure homeostasis	12/179	437/18670	0.00107035	0.0364167	0.0323793	SFTPA1/SFTPA2/NAPSA/SFTPD/CTSH/PIGR/FGGY/CLDN18/CA2/LPCAT1/AZGP1/IL20RA	12	GO	LAM1: Cluster0
GO:0002446	GO:neutrophil mediated immunity	13/179	499/18670	0.00107808	0.0364167	0.0323793	NPC2/CTSH/SLPI/MGST1/PIGR/CD36/LPCAT1/FABP5/PLA2G1B/C3/CHI3L1/VAPA/CAT	13	GO	LAM1: Cluster0
GO:0032103	GO:positive regulation of response to external stimulus	10/179	323/18670	0.00114754	0.0382661	0.0340236	PGC/CXCL17/S100A14/LRRK2/SERPINF2/LGMN/F3/C3/CPB2/APOH	10	GO	LAM1: Cluster0
GO:0046470	GO:phosphatidylcholine metabolic process	5/179	83/18670	0.00121606	0.0397558	0.0353481	DBI/MFSD2A/LPCAT1/FABP5/PLA2G1B	5	GO	LAM1: Cluster0
GO:1901617	GO:organic hydroxy compound biosynthetic process	9/179	271/18670	0.00124466	0.0397558	0.0353481	MSMO1/QDPR/EBP/FDFT1/PCBD1/FASN/DHCR24/HMGCS1/SQLE	9	GO	LAM1: Cluster0
GO:0001838	GO:embryonic epithelial tube formation	6/179	124/18670	0.00125335	0.0397558	0.0353481	SDC4/FOLR1/SPINT2/IRX3/DLC1/IFT57	6	GO	LAM1: Cluster0
GO:0019218	GO:regulation of steroid metabolic process	6/179	124/18670	0.00125335	0.0397558	0.0353481	FDFT1/FASN/ATP1A1/HMGCS1/SQLE/ACADL	6	GO	LAM1: Cluster0
GO:0043154	GO:negative regulation of cysteine-type endopeptidase activity involved in apoptotic process	5/179	84/18670	0.00128314	0.0402101	0.0357521	LAMP3/PRDX5/AQP1/SFN/DHCR24	5	GO	LAM1: Cluster0
GO:0045540	GO:regulation of cholesterol biosynthetic process	4/179	50/18670	0.00133402	0.0403462	0.0358731	FDFT1/FASN/HMGCS1/SQLE	4	GO	LAM1: Cluster0
GO:0060425	GO:lung morphogenesis	4/179	50/18670	0.00133402	0.0403462	0.0358731	CTSH/NKX2-1/HHIP/FGF7	4	GO	LAM1: Cluster0
GO:0106118	GO:regulation of sterol biosynthetic process	4/179	50/18670	0.00133402	0.0403462	0.0358731	FDFT1/FASN/HMGCS1/SQLE	4	GO	LAM1: Cluster0
GO:0030324	GO:lung development	7/179	172/18670	0.0013731	0.0410509	0.0364997	SFTPD/CTSH/NKX2-1/HHIP/AGR2/FGF7/CHI3L1	7	GO	LAM1: Cluster0
GO:0071677	GO:positive regulation of mononuclear cell migration	3/179	24/18670	0.00151237	0.0447007	0.0397448	CXCL17/S100A14/LGMN	3	GO	LAM1: Cluster0
GO:0030323	GO:respiratory tube development	7/179	176/18670	0.00156674	0.0457876	0.0407112	SFTPD/CTSH/NKX2-1/HHIP/AGR2/FGF7/CHI3L1	7	GO	LAM1: Cluster0
GO:0090025	GO:regulation of monocyte chemotaxis	3/179	25/18670	0.00170656	0.0487886	0.0433795	CXCL17/S100A14/LGMN	3	GO	LAM1: Cluster0
GO:0072175	GO:epithelial tube formation	6/179	132/18670	0.00172591	0.0487886	0.0433795	SDC4/FOLR1/SPINT2/IRX3/DLC1/IFT57	6	GO	LAM1: Cluster0
GO:0001843	GO:neural tube closure	5/179	90/18670	0.00174446	0.0487886	0.0433795	SDC4/FOLR1/SPINT2/DLC1/IFT57	5	GO	LAM1: Cluster0
GO:1903035	GO:negative regulation of response to wounding	5/179	90/18670	0.00174446	0.0487886	0.0433795	TFPI/FGG/SERPINF2/CPB2/APOH	5	GO	LAM1: Cluster0
GO:0006732	GO:coenzyme metabolic process	11/179	403/18670	0.00180303	0.0498904	0.0443591	DBI/CYB5A/DCXR/NNMT/MBIP/MTHFS/FOLR1/QDPR/PCBD1/FASN/HMGCS1	11	GO	LAM1: Cluster0
GO:0060606	GO:tube closure	5/179	91/18670	0.00183178	0.0501522	0.0445919	SDC4/FOLR1/SPINT2/DLC1/IFT57	5	GO	LAM1: Cluster0
GO:0042044	GO:fluid transport	3/179	26/18670	0.00191564	0.0513348	0.0456434	AQP3/AQP1/AQP4	3	GO	LAM1: Cluster0
GO:2000117	GO:negative regulation of cysteine-type endopeptidase activity	5/179	92/18670	0.00192226	0.0513348	0.0456434	LAMP3/PRDX5/AQP1/SFN/DHCR24	5	GO	LAM1: Cluster0
GO:0001889	GO:liver development	6/179	135/18670	0.00193418	0.0513348	0.0456434	CITED2/QDPR/CPB2/XBP1/MPST/HMGCS1	6	GO	LAM1: Cluster0
GO:0033273	GO:response to vitamin	5/179	93/18670	0.00201597	0.0529649	0.0470928	AQP3/FOLR1/ALPL/CAT/HMGCS1	5	GO	LAM1: Cluster0
GO:0051289	GO:protein homotetramerization	5/179	94/18670	0.00211297	0.0549583	0.0488651	DCXR/PCBD1/AQP4/CAT/ACADL	5	GO	LAM1: Cluster0
GO:0036151	GO:phosphatidylcholine acyl-chain remodeling	3/179	27/18670	0.00214001	0.0551042	0.0489949	DBI/LPCAT1/PLA2G1B	3	GO	LAM1: Cluster0
GO:0061008	GO:hepaticobiliary system development	6/179	138/18670	0.00216095	0.0551042	0.0489949	CITED2/QDPR/CPB2/XBP1/MPST/HMGCS1	6	GO	LAM1: Cluster0
GO:0050810	GO:regulation of steroid biosynthetic process	5/179	95/18670	0.00221333	0.0558919	0.0496953	FDFT1/FASN/ATP1A1/HMGCS1/SQLE	5	GO	LAM1: Cluster0
GO:0006720	GO:isoprenoid metabolic process	6/179	139/18670	0.00224082	0.0560421	0.0498288	NPC2/SDR16C5/SDC4/SDC2/FDFT1/HMGCS1	6	GO	LAM1: Cluster0
GO:0042737	GO:drug catabolic process	6/179	140/18670	0.0023229	0.0575416	0.0511621	CTSH/MTHFS/PRDX5/QDPR/PCBD1/CAT	6	GO	LAM1: Cluster0
GO:0002758	GO:innate immune response-activating signal transduction	9/179	298/18670	0.00237965	0.0583911	0.0519174	SFTPA1/SFTPA2/SFTPD/MUC1/S100A14/CD36/FGG/LGMN/DMBT1	9	GO	LAM1: Cluster0
GO:0014020	GO:primary neural tube formation	5/179	97/18670	0.00242441	0.0589336	0.0523998	SDC4/FOLR1/SPINT2/DLC1/IFT57	5	GO	LAM1: Cluster0
GO:0043312	GO:neutrophil degranulation	12/179	485/18670	0.00255636	0.0615007	0.0546822	NPC2/CTSH/SLPI/MGST1/PIGR/CD36/LPCAT1/FABP5/C3/CHI3L1/VAPA/CAT	12	GO	LAM1: Cluster0
GO:0043062	GO:extracellular structure organization	11/179	422/18670	0.00257731	0.0615007	0.0546822	SDC4/ELF3/CD36/FGG/SERPINF2/SPINT2/CPB2/BMP1/ITGB6/NTN4/CREB3L1	11	GO	LAM1: Cluster0
GO:0060441	GO:epithelial tube branching involved in lung morphogenesis	3/179	29/18670	0.0026361	0.0623319	0.0554212	CTSH/NKX2-1/HHIP	3	GO	LAM1: Cluster0
GO:0002283	GO:neutrophil activation involved in immune response	12/179	488/18670	0.00268789	0.0624737	0.0555474	NPC2/CTSH/SLPI/MGST1/PIGR/CD36/LPCAT1/FABP5/C3/CHI3L1/VAPA/CAT	12	GO	LAM1: Cluster0
GO:0097237	GO:cellular response to toxic substance	8/179	247/18670	0.00269014	0.0624737	0.0555474	MGST1/CD36/LRRK2/PRDX5/ADIRF/AQP1/SOD3/CAT	8	GO	LAM1: Cluster0
GO:0010038	GO:response to metal ion	10/179	364/18670	0.00275678	0.0634546	0.0564195	CYB5A/AQP3/LRRK2/CA2/FGG/QDPR/LGMN/AQP1/SOD3/CAT	10	GO	LAM1: Cluster0
GO:0001763	GO:morphogenesis of a branching structure	7/179	196/18670	0.00287457	0.0655857	0.0583143	CTSH/NKX2-1/LRRK2/HHIP/SPINT2/FGF7/NTN4	7	GO	LAM1: Cluster0
GO:0098869	GO:cellular oxidant detoxification	5/179	102/18670	0.00301573	0.0675302	0.0600432	MGST1/CD36/PRDX5/SOD3/CAT	5	GO	LAM1: Cluster0
GO:0060541	GO:respiratory system development	7/179	198/18670	0.00304105	0.0675302	0.0600432	SFTPD/CTSH/NKX2-1/HHIP/AGR2/FGF7/CHI3L1	7	GO	LAM1: Cluster0
GO:0008643	GO:carbohydrate transport	6/179	148/18670	0.00306365	0.0675302	0.0600432	AQP3/MFSD2A/FABP5/PLA2G1B/C3/AQP1	6	GO	LAM1: Cluster0
GO:0035148	GO:tube formation	6/179	148/18670	0.00306365	0.0675302	0.0600432	SDC4/FOLR1/SPINT2/IRX3/DLC1/IFT57	6	GO	LAM1: Cluster0
GO:0042119	GO:neutrophil activation	12/179	498/18670	0.00316675	0.0692162	0.0615423	NPC2/CTSH/SLPI/MGST1/PIGR/CD36/LPCAT1/FABP5/C3/CHI3L1/VAPA/CAT	12	GO	LAM1: Cluster0
GO:0016331	GO:morphogenesis of embryonic epithelium	6/179	150/18670	0.00327364	0.0709561	0.0630893	SDC4/FOLR1/SPINT2/IRX3/DLC1/IFT57	6	GO	LAM1: Cluster0
GO:0045600	GO:positive regulation of fat cell differentiation	4/179	64/18670	0.00331751	0.0713127	0.0634064	WIF1/XBP1/ADIRF/LMO3	4	GO	LAM1: Cluster0
GO:0001841	GO:neural tube formation	5/179	105/18670	0.00341687	0.0728465	0.0647701	SDC4/FOLR1/SPINT2/DLC1/IFT57	5	GO	LAM1: Cluster0
GO:1902235	GO:regulation of endoplasmic reticulum stress-induced intrinsic apoptotic signaling pathway	3/179	32/18670	0.00350381	0.0740928	0.0658782	LRRK2/XBP1/CREB3L1	3	GO	LAM1: Cluster0
GO:0040014	GO:regulation of multicellular organism growth	4/179	66/18670	0.00370786	0.0771169	0.0685671	LGMN/CACNA2D2/SOCS2/GDF15	4	GO	LAM1: Cluster0
GO:0002218	GO:activation of innate immune response	9/179	319/18670	0.00373577	0.0771169	0.0685671	SFTPA1/SFTPA2/SFTPD/MUC1/S100A14/CD36/FGG/LGMN/DMBT1	9	GO	LAM1: Cluster0
GO:0006650	GO:glycerophospholipid metabolic process	9/179	319/18670	0.00373577	0.0771169	0.0685671	DBI/MFSD2A/CISH/LPCAT1/FABP5/PLA2G1B/SOCS2/SH3YL1/PTPN13	9	GO	LAM1: Cluster0
GO:0061140	GO:lung secretory cell differentiation	2/179	10/18670	0.00391064	0.0794654	0.0706552	NKX2-1/AGR2	2	GO	LAM1: Cluster0
GO:2000425	GO:regulation of apoptotic cell clearance	2/179	10/18670	0.00391064	0.0794654	0.0706552	C2/C3	2	GO	LAM1: Cluster0
GO:0060562	GO:epithelial tube morphogenesis	9/179	322/18670	0.00397096	0.0800657	0.071189	CTSH/SDC4/NKX2-1/HHIP/FOLR1/SPINT2/IRX3/DLC1/IFT57	9	GO	LAM1: Cluster0
GO:0050891	GO:multicellular organismal water homeostasis	4/179	68/18670	0.00412824	0.0825966	0.0734393	AQP3/AQP1/SFN/AQP4	4	GO	LAM1: Cluster0
GO:0098739	GO:import across plasma membrane	5/179	110/18670	0.00416859	0.0827616	0.073586	ATP1B1/FOLR1/SLC39A8/KCNJ15/ATP1A1	5	GO	LAM1: Cluster0
GO:0097529	GO:myeloid leukocyte migration	7/179	210/18670	0.00420013	0.0827616	0.073586	SFTPD/CXCL17/S100A14/CSF3R/LGMN/PLA2G1B/CXCL2	7	GO	LAM1: Cluster0
GO:0046661	GO:male sex differentiation	6/179	160/18670	0.00448826	0.0863903	0.0768124	CITED2/MGST1/NKX2-1/SRY/DHCR24/HMGCS1	6	GO	LAM1: Cluster0
GO:1990748	GO:cellular detoxification	5/179	112/18670	0.00449997	0.0863903	0.0768124	MGST1/CD36/PRDX5/SOD3/CAT	5	GO	LAM1: Cluster0
GO:0001655	GO:urogenital system development	9/179	330/18670	0.00465517	0.0863903	0.0768124	CTSH/SDC4/LRRK2/CA2/EPCAM/ALOX15B/IRX3/MPST/CAT	9	GO	LAM1: Cluster0
GO:0006558	GO:L-phenylalanine metabolic process	2/179	11/18670	0.00474964	0.0863903	0.0768124	QDPR/PCBD1	2	GO	LAM1: Cluster0
GO:0006559	GO:L-phenylalanine catabolic process	2/179	11/18670	0.00474964	0.0863903	0.0768124	QDPR/PCBD1	2	GO	LAM1: Cluster0
GO:0015791	GO:polyol transport	2/179	11/18670	0.00474964	0.0863903	0.0768124	AQP3/AQP1	2	GO	LAM1: Cluster0
GO:0033327	GO:Leydig cell differentiation	2/179	11/18670	0.00474964	0.0863903	0.0768124	MGST1/NKX2-1	2	GO	LAM1: Cluster0
GO:0070278	GO:extracellular matrix constituent secretion	2/179	11/18670	0.00474964	0.0863903	0.0768124	CPB2/CREB3L1	2	GO	LAM1: Cluster0
GO:1902221	GO:erythrose 4-phosphate/phosphoenolpyruvate family amino acid metabolic process	2/179	11/18670	0.00474964	0.0863903	0.0768124	QDPR/PCBD1	2	GO	LAM1: Cluster0
GO:1902222	GO:erythrose 4-phosphate/phosphoenolpyruvate family amino acid catabolic process	2/179	11/18670	0.00474964	0.0863903	0.0768124	QDPR/PCBD1	2	GO	LAM1: Cluster0
GO:1905941	GO:positive regulation of gonad development	2/179	11/18670	0.00474964	0.0863903	0.0768124	CITED2/SRY	2	GO	LAM1: Cluster0
GO:0002385	GO:mucosal immune response	3/179	36/18670	0.00490453	0.0873745	0.0776874	PIGR/H2BC12/PLA2G1B	3	GO	LAM1: Cluster0
GO:0003091	GO:renal water homeostasis	3/179	36/18670	0.00490453	0.0873745	0.0776874	AQP3/AQP1/AQP4	3	GO	LAM1: Cluster0
GO:0060428	GO:lung epithelium development	3/179	36/18670	0.00490453	0.0873745	0.0776874	NKX2-1/AGR2/FGF7	3	GO	LAM1: Cluster0
GO:0007584	GO:response to nutrient	7/179	219/18670	0.00526872	0.0926174	0.0823491	AQP3/C2/FOLR1/ALPL/XBP1/CAT/HMGCS1	7	GO	LAM1: Cluster0
GO:0007431	GO:salivary gland development	3/179	37/18670	0.00530009	0.0926174	0.0823491	XBP1/FGF7/NTN4	3	GO	LAM1: Cluster0
GO:0061844	GO:antimicrobial humoral immune response mediated by antimicrobial peptide	4/179	73/18670	0.00531743	0.0926174	0.0823491	PGC/H2BC12/PLA2G1B/CXCL2	4	GO	LAM1: Cluster0
GO:0010876	GO:lipid localization	10/179	400/18670	0.00534126	0.0926174	0.0823491	SFTPA1/NPC2/MID1IP1/MFSD2A/ABCA3/CD36/PLA2G1B/C3/SQLE/APOH	10	GO	LAM1: Cluster0
GO:0001822	GO:kidney development	8/179	278/18670	0.00547297	0.0942728	0.0838209	CTSH/SDC4/LRRK2/CA2/EPCAM/IRX3/MPST/CAT	8	GO	LAM1: Cluster0
GO:0030104	GO:water homeostasis	4/179	74/18670	0.00557996	0.0944328	0.0839632	AQP3/AQP1/SFN/AQP4	4	GO	LAM1: Cluster0
GO:0008228	GO:opsonization	2/179	12/18670	0.00566379	0.0944328	0.0839632	SFTPA1/C4BPA	2	GO	LAM1: Cluster0
GO:0009642	GO:response to light intensity	2/179	12/18670	0.00566379	0.0944328	0.0839632	CAT/HMGCS1	2	GO	LAM1: Cluster0
GO:0033197	GO:response to vitamin E	2/179	12/18670	0.00566379	0.0944328	0.0839632	CAT/HMGCS1	2	GO	LAM1: Cluster0
GO:0097284	GO:hepatocyte apoptotic process	2/179	12/18670	0.00566379	0.0944328	0.0839632	KRT18/KRT8	2	GO	LAM1: Cluster0
GO:0006656	GO:phosphatidylcholine biosynthetic process	3/179	38/18670	0.00571431	0.0946683	0.0841726	MFSD2A/LPCAT1/FABP5	3	GO	LAM1: Cluster0
GO:0030100	GO:regulation of endocytosis	8/179	281/18670	0.00582861	0.0959506	0.0853128	SFTPA1/SFTPA2/SFTPD/C4BPA/C2/CD36/LRRK2/C3	8	GO	LAM1: Cluster0
GO:0030595	GO:leukocyte chemotaxis	7/179	224/18670	0.0059443	0.0965636	0.0858577	SFTPD/CXCL17/S100A14/CSF3R/LGMN/PLA2G1B/CXCL2	7	GO	LAM1: Cluster0
GO:0003014	GO:renal system process	5/179	120/18670	0.00601434	0.0965636	0.0858577	AQP3/SERPINF2/LGMN/AQP1/AQP4	5	GO	LAM1: Cluster0
GO:0006721	GO:terpenoid metabolic process	5/179	120/18670	0.00601434	0.0965636	0.0858577	SDR16C5/SDC4/SDC2/FDFT1/HMGCS1	5	GO	LAM1: Cluster0
GO:0022612	GO:gland morphogenesis	5/179	120/18670	0.00601434	0.0965636	0.0858577	ELF3/CPB2/XBP1/FGF7/NTN4	5	GO	LAM1: Cluster0
GO:0002251	GO:organ or tissue specific immune response	3/179	39/18670	0.00614742	0.0980947	0.0872191	PIGR/H2BC12/PLA2G1B	3	GO	LAM1: Cluster0
hsa04145	KEGG:Phagosome	24/134	152/8104	2.03041e-17	3.9999e-15	3.24865e-15	MARCO/HLA-DPA1/HLA-DPB1/HLA-DRB5/HLA-DRB1/HLA-DMA/HLA-DRA/HLA-DQA1/HLA-DMB/OLR1/HLA-DQB1/ATP6V0B/NCF2/MSR1/FCGR3A/CYBA/CTSS/ATP6V1F/ATP6V0D1/FCGR1A/RAB5C/FCGR2A/HLA-B/LAMP1	24	KEGG	LAM1: Cluster1
hsa04142	KEGG:Lysosome	19/134	128/8104	1.87017e-13	1.84212e-11	1.49613e-11	CTSD/CD68/ACP5/CTSC/ATP6V0B/CTSB/SLC11A1/PSAP/LIPA/CTSS/CTSZ/GAA/ATP6V0D1/FUCA1/HEXB/LAMP1/DNASE2/CLTA/ASAH1	19	KEGG	LAM1: Cluster1
hsa05152	KEGG:Tuberculosis	21/134	180/8104	1.17647e-12	7.72548e-11	6.2745e-11	CTSD/HLA-DPA1/FCER1G/HLA-DPB1/CD74/HLA-DRB5/HLA-DRB1/HLA-DMA/HLA-DRA/HLA-DQA1/HLA-DMB/HLA-DQB1/ATP6V0B/FCGR3A/CTSS/ATP6V0D1/FCGR1A/RAB5C/FCGR2A/CEBPB/LAMP1	21	KEGG	LAM1: Cluster1
hsa05150	KEGG:Staphylococcus aureus infection	16/134	96/8104	2.72551e-12	1.34231e-10	1.0902e-10	C1QB/C1QA/C1QC/HLA-DPA1/HLA-DPB1/HLA-DRB5/HLA-DRB1/HLA-DMA/HLA-DRA/HLA-DQA1/HLA-DMB/HLA-DQB1/CFD/FCGR3A/FCGR1A/FCGR2A	16	KEGG	LAM1: Cluster1
hsa05140	KEGG:Leishmaniasis	14/134	77/8104	1.99261e-11	7.85087e-10	6.37635e-10	HLA-DPA1/HLA-DPB1/HLA-DRB5/HLA-DRB1/HLA-DMA/HLA-DRA/HLA-DQA1/HLA-DMB/HLA-DQB1/NCF2/FCGR3A/CYBA/FCGR1A/FCGR2A	14	KEGG	LAM1: Cluster1
hsa05310	KEGG:Asthma	10/134	31/8104	3.59798e-11	1.18134e-09	9.5946e-10	HLA-DPA1/FCER1G/HLA-DPB1/HLA-DRB5/HLA-DRB1/HLA-DMA/HLA-DRA/HLA-DQA1/HLA-DMB/HLA-DQB1	10	KEGG	LAM1: Cluster1
hsa05322	KEGG:Systemic lupus erythematosus	17/134	136/8104	6.48839e-11	1.82602e-09	1.48306e-09	C1QB/C1QA/C1QC/HLA-DPA1/HLA-DPB1/HLA-DRB5/HLA-DRB1/HLA-DMA/HLA-DRA/HLA-DQA1/HLA-DMB/HLA-DQB1/H2AZ1/FCGR3A/FCGR1A/FCGR2A/MACROH2A1	17	KEGG	LAM1: Cluster1
hsa04612	KEGG:Antigen processing and presentation	13/134	78/8104	3.39266e-10	7.60947e-09	6.18028e-09	HLA-DPA1/HLA-DPB1/CD74/HLA-DRB5/HLA-DRB1/HLA-DMA/HLA-DRA/HLA-DQA1/HLA-DMB/HLA-DQB1/CTSB/CTSS/HLA-B	13	KEGG	LAM1: Cluster1
hsa05330	KEGG:Allograft rejection	10/134	38/8104	3.47641e-10	7.60947e-09	6.18028e-09	HLA-DPA1/HLA-DPB1/HLA-DRB5/HLA-DRB1/HLA-DMA/HLA-DRA/HLA-DQA1/HLA-DMB/HLA-DQB1/HLA-B	10	KEGG	LAM1: Cluster1
hsa05332	KEGG:Graft-versus-host disease	10/134	42/8104	1.02306e-09	2.01542e-08	1.63689e-08	HLA-DPA1/HLA-DPB1/HLA-DRB5/HLA-DRB1/HLA-DMA/HLA-DRA/HLA-DQA1/HLA-DMB/HLA-DQB1/HLA-B	10	KEGG	LAM1: Cluster1
hsa04940	KEGG:Type I diabetes mellitus	10/134	43/8104	1.31451e-09	2.35417e-08	1.91202e-08	HLA-DPA1/HLA-DPB1/HLA-DRB5/HLA-DRB1/HLA-DMA/HLA-DRA/HLA-DQA1/HLA-DMB/HLA-DQB1/HLA-B	10	KEGG	LAM1: Cluster1
hsa05323	KEGG:Rheumatoid arthritis	13/134	93/8104	3.23618e-09	5.31273e-08	4.31491e-08	ACP5/HLA-DPA1/HLA-DPB1/HLA-DRB5/HLA-DRB1/HLA-DMA/HLA-DRA/HLA-DQA1/HLA-DMB/HLA-DQB1/ATP6V0B/ATP6V1F/ATP6V0D1	13	KEGG	LAM1: Cluster1
hsa05320	KEGG:Autoimmune thyroid disease	10/134	53/8104	1.16197e-08	1.76083e-07	1.43011e-07	HLA-DPA1/HLA-DPB1/HLA-DRB5/HLA-DRB1/HLA-DMA/HLA-DRA/HLA-DQA1/HLA-DMB/HLA-DQB1/HLA-B	10	KEGG	LAM1: Cluster1
hsa05416	KEGG:Viral myocarditis	10/134	60/8104	4.07287e-08	5.73111e-07	4.65471e-07	HLA-DPA1/HLA-DPB1/HLA-DRB5/HLA-DRB1/HLA-DMA/HLA-DRA/HLA-DQA1/HLA-DMB/HLA-DQB1/HLA-B	10	KEGG	LAM1: Cluster1
hsa04672	KEGG:Intestinal immune network for IgA production	9/134	49/8104	8.28134e-08	1.08762e-06	8.83342e-07	HLA-DPA1/HLA-DPB1/HLA-DRB5/HLA-DRB1/HLA-DMA/HLA-DRA/HLA-DQA1/HLA-DMB/HLA-DQB1	9	KEGG	LAM1: Cluster1
hsa04640	KEGG:Hematopoietic cell lineage	11/134	99/8104	6.11595e-07	7.53027e-06	6.11595e-06	HLA-DPA1/HLA-DPB1/HLA-DRB5/HLA-DRB1/HLA-DMA/HLA-DRA/HLA-DQA1/HLA-DMB/HLA-DQB1/FCGR1A/CD44	11	KEGG	LAM1: Cluster1
hsa05321	KEGG:Inflammatory bowel disease	9/134	65/8104	1.03047e-06	1.19414e-05	9.69858e-06	HLA-DPA1/HLA-DPB1/HLA-DRB5/HLA-DRB1/HLA-DMA/HLA-DRA/HLA-DQA1/HLA-DMB/HLA-DQB1	9	KEGG	LAM1: Cluster1
hsa04979	KEGG:Cholesterol metabolism	8/134	50/8104	1.35645e-06	1.48456e-05	1.20573e-05	APOC1/APOE/LPL/TSPO/CYP27A1/LRPAP1/LIPA/VDAC2	8	KEGG	LAM1: Cluster1
hsa00030	KEGG:Pentose phosphate pathway	6/134	30/8104	7.82867e-06	8.11709e-05	6.59256e-05	TKT/FBP1/TALDO1/PGD/ALDOA/G6PD	6	KEGG	LAM1: Cluster1
hsa05145	KEGG:Toxoplasmosis	10/134	112/8104	1.47568e-05	0.000145355	0.000118054	HLA-DPA1/HLA-DPB1/HLA-DRB5/HLA-DRB1/HLA-DMA/HLA-DRA/HLA-DQA1/HLA-DMB/HLA-DQB1/ALOX5	10	KEGG	LAM1: Cluster1
hsa04658	KEGG:Th1 and Th2 cell differentiation	9/134	92/8104	1.92145e-05	0.00018025	0.000146396	HLA-DPA1/HLA-DPB1/HLA-DRB5/HLA-DRB1/HLA-DMA/HLA-DRA/HLA-DQA1/HLA-DMB/HLA-DQB1	9	KEGG	LAM1: Cluster1
hsa03320	KEGG:PPAR signaling pathway	8/134	76/8104	3.3216e-05	0.000297435	0.000241571	FABP4/LPL/OLR1/CYP27A1/PPARG/FABP5/PLIN2/SCD	8	KEGG	LAM1: Cluster1
hsa00480	KEGG:Glutathione metabolism	7/134	57/8104	3.83559e-05	0.000328527	0.000266824	GPX1/GPX4/GSTO1/PGD/MGST3/G6PD/IDH1	7	KEGG	LAM1: Cluster1
hsa04380	KEGG:Osteoclast differentiation	10/134	128/8104	4.72855e-05	0.000388135	0.000315237	TYROBP/ACP5/SPI1/NCF2/FCGR3A/CYBA/PPARG/FCGR1A/FCGR2A/TREM2	10	KEGG	LAM1: Cluster1
hsa05166	KEGG:Human T-cell leukemia virus 1 infection	13/134	219/8104	6.32372e-05	0.000487521	0.000395956	HLA-DPA1/HLA-DPB1/TSPO/HLA-DRB5/HLA-DRB1/HLA-DMA/HLA-DRA/SPI1/HLA-DQA1/HLA-DMB/HLA-DQB1/VDAC2/HLA-B	13	KEGG	LAM1: Cluster1
hsa04659	KEGG:Th17 cell differentiation	9/134	107/8104	6.43429e-05	0.000487521	0.000395956	HLA-DPA1/HLA-DPB1/HLA-DRB5/HLA-DRB1/HLA-DMA/HLA-DRA/HLA-DQA1/HLA-DMB/HLA-DQB1	9	KEGG	LAM1: Cluster1
hsa05169	KEGG:Epstein-Barr virus infection	12/134	202/8104	0.000121587	0.000887134	0.000720515	HLA-DPA1/HLA-DPB1/HLA-DRB5/HLA-DRB1/HLA-DMA/HLA-DRA/HLA-DQA1/HLA-DMB/HLA-DQB1/VIM/HLA-B/CD44	12	KEGG	LAM1: Cluster1
hsa04514	KEGG:Cell adhesion molecules	10/134	149/8104	0.000169649	0.0011936	0.000969421	HLA-DPA1/HLA-DPB1/HLA-DRB5/HLA-DRB1/HLA-DMA/HLA-DRA/HLA-DQA1/HLA-DMB/HLA-DQB1/HLA-B	10	KEGG	LAM1: Cluster1
hsa04610	KEGG:Complement and coagulation cascades	7/134	85/8104	0.000487907	0.0033144	0.0026919	C1QB/C1QA/VSIG4/C1QC/SERPING1/SERPINA1/CFD	7	KEGG	LAM1: Cluster1
hsa04216	KEGG:Ferroptosis	5/134	41/8104	0.000532921	0.00342658	0.00278301	FTL/FTH1/GPX4/HMOX1/VDAC2	5	KEGG	LAM1: Cluster1
hsa05164	KEGG:Influenza A	10/134	172/8104	0.000539208	0.00342658	0.00278301	HLA-DPA1/HLA-DPB1/HLA-DRB5/HLA-DRB1/HLA-DMA/HLA-DRA/HLA-DQA1/HLA-DMB/PYCARD/HLA-DQB1	10	KEGG	LAM1: Cluster1
hsa01200	KEGG:Carbon metabolism	7/134	116/8104	0.00302044	0.0185946	0.0151022	TKT/FBP1/TALDO1/PGD/ALDOA/G6PD/IDH1	7	KEGG	LAM1: Cluster1
hsa01230	KEGG:Biosynthesis of amino acids	5/134	75/8104	0.00785117	0.0468691	0.0380663	TKT/TALDO1/GLUL/ALDOA/IDH1	5	KEGG	LAM1: Cluster1
hsa05133	KEGG:Pertussis	5/134	76/8104	0.00829505	0.0480625	0.0390355	C1QB/C1QA/C1QC/SERPING1/PYCARD	5	KEGG	LAM1: Cluster1
hsa04721	KEGG:Synaptic vesicle cycle	5/134	78/8104	0.00923451	0.0519771	0.0422149	ATP6V0B/ATP6V1F/ATP6V0D1/CLTA/AP2S1	5	KEGG	LAM1: Cluster1
hsa04613	KEGG:Neutrophil extracellular trap formation	8/134	190/8104	0.0133212	0.0728967	0.0592054	H2AZ1/NCF2/FCGR3A/CYBA/FCGR1A/FCGR2A/VDAC2/MACROH2A1	8	KEGG	LAM1: Cluster1
hsa04217	KEGG:Necroptosis	7/134	159/8104	0.0161399	0.0859342	0.0697942	FTL/FTH1/PYCARD/H2AZ1/GLUL/VDAC2/MACROH2A1	7	KEGG	LAM1: Cluster1
hsa00051	KEGG:Fructose and mannose metabolism	3/134	33/8104	0.0167963	0.0870753	0.0707211	FBP1/AKR1B1/ALDOA	3	KEGG	LAM1: Cluster1
hsa00561	KEGG:Glycerolipid metabolism	4/134	61/8104	0.0180401	0.0888477	0.0721605	ALDH2/LPL/AKR1B1/AGPAT2	4	KEGG	LAM1: Cluster1
hsa00590	KEGG:Arachidonic acid metabolism	4/134	61/8104	0.0180401	0.0888477	0.0721605	LTA4H/GPX1/ALOX5/PLAAT3	4	KEGG	LAM1: Cluster1
HALLMARK_COMPLEMENT	MSIGDB:COMPLEMENT	17/112	200/4384	9.42267e-06	0.000395752	0.000327314	C1QA/APOC1/LGALS3/C1QC/CTSD/FCER1G/CTSC/LTA4H/SERPING1/SERPINA1/OLR1/S100A9/ANXA5/CTSB/LIPA/CTSS/CEBPB	17	MSIGDB HALLMARK	LAM1: Cluster1
HALLMARK_ADIPOGENESIS	MSIGDB:ADIPOGENESIS	16/112	200/4384	3.79176e-05	0.000796269	0.000658569	TKT/FABP4/ALDH2/APOE/LPL/GPX4/TALDO1/PPARG/MGST3/ALDOA/RMDN3/DECR1/HADH/PLIN2/PHYH/IDH1	16	MSIGDB HALLMARK	LAM1: Cluster1
HALLMARK_CHOLESTEROL_HOMEOSTASIS	MSIGDB:CHOLESTEROL_HOMEOSTASIS	9/112	74/4384	9.24549e-05	0.00129437	0.00107053	S100A11/LGALS3/LPL/CXCL16/ETHE1/ANXA5/PPARG/FABP5/SCD	9	MSIGDB HALLMARK	LAM1: Cluster1
HALLMARK_XENOBIOTIC_METABOLISM	MSIGDB:XENOBIOTIC_METABOLISM	12/112	200/4384	0.00461931	0.0485027	0.040115	ALDH2/FBP1/APOE/CES1/CYP27A1/COMT/GSTO1/PGD/HMOX1/RBP4/UPP1/IDH1	12	MSIGDB HALLMARK	LAM1: Cluster1
HALLMARK_REACTIVE_OXYGEN_SPECIES_PATHWAY	MSIGDB:REACTIVE_OXYGEN_SPECIES_PATHWAY	5/112	49/4384	0.00775189	0.0651159	0.0538553	FTL/GPX4/GLRX/TXN/G6PD	5	MSIGDB HALLMARK	LAM1: Cluster1
HALLMARK_ALLOGRAFT_REJECTION	MSIGDB:ALLOGRAFT_REJECTION	11/112	200/4384	0.0124468	0.0746808	0.0617661	CD74/HLA-DMA/HLA-DRA/SPI1/HLA-DQA1/HLA-DMB/CAPG/CTSS/DARS1/LY86/INHBA	11	MSIGDB HALLMARK	LAM1: Cluster1
HALLMARK_INTERFERON_GAMMA_RESPONSE	MSIGDB:INTERFERON_GAMMA_RESPONSE	11/112	200/4384	0.0124468	0.0746808	0.0617661	CD74/HLA-DRB1/HLA-DMA/HLA-DQA1/SERPING1/LGALS3BP/FCGR1A/UPP1/VAMP8/HLA-B/LY6E	11	MSIGDB HALLMARK	LAM1: Cluster1
HALLMARK_FATTY_ACID_METABOLISM	MSIGDB:FATTY_ACID_METABOLISM	9/112	158/4384	0.0188123	0.0987647	0.0816851	BLVRA/H2AZ1/GLUL/GPD1/ALDOA/DECR1/ACOT2/HADH/IDH1	9	MSIGDB HALLMARK	LAM1: Cluster1
GO:0043312	GO:neutrophil degranulation	46/189	485/18670	1.16176e-31	2.4705e-28	1.82246e-28	FTL/S100A11/TYROBP/LGALS3/CTSD/FTH1/GRN/CD68/FCER1G/HP/CTSC/LTA4H/LYZ/SERPINA1/OLR1/PYCARD/S100A9/CST3/LAMTOR1/CSTB/CREG1/CFD/ALOX5/CTSB/SLC11A1/PSAP/CYBA/MNDA/CTSS/ALDOA/FABP5/CTSZ/GAA/BRI3/RAB5C/FCGR2A/FUCA1/STXBP2/HEXB/VAMP8/IDH1/LAMP1/AGPAT2/RNASET2/ASAH1/CD44	46	GO	LAM1: Cluster1
GO:0002283	GO:neutrophil activation involved in immune response	46/189	488/18670	1.52877e-31	2.4705e-28	1.82246e-28	FTL/S100A11/TYROBP/LGALS3/CTSD/FTH1/GRN/CD68/FCER1G/HP/CTSC/LTA4H/LYZ/SERPINA1/OLR1/PYCARD/S100A9/CST3/LAMTOR1/CSTB/CREG1/CFD/ALOX5/CTSB/SLC11A1/PSAP/CYBA/MNDA/CTSS/ALDOA/FABP5/CTSZ/GAA/BRI3/RAB5C/FCGR2A/FUCA1/STXBP2/HEXB/VAMP8/IDH1/LAMP1/AGPAT2/RNASET2/ASAH1/CD44	46	GO	LAM1: Cluster1
GO:0042119	GO:neutrophil activation	46/189	498/18670	3.76537e-31	3.32561e-28	2.45327e-28	FTL/S100A11/TYROBP/LGALS3/CTSD/FTH1/GRN/CD68/FCER1G/HP/CTSC/LTA4H/LYZ/SERPINA1/OLR1/PYCARD/S100A9/CST3/LAMTOR1/CSTB/CREG1/CFD/ALOX5/CTSB/SLC11A1/PSAP/CYBA/MNDA/CTSS/ALDOA/FABP5/CTSZ/GAA/BRI3/RAB5C/FCGR2A/FUCA1/STXBP2/HEXB/VAMP8/IDH1/LAMP1/AGPAT2/RNASET2/ASAH1/CD44	46	GO	LAM1: Cluster1
GO:0002446	GO:neutrophil mediated immunity	46/189	499/18670	4.11586e-31	3.32561e-28	2.45327e-28	FTL/S100A11/TYROBP/LGALS3/CTSD/FTH1/GRN/CD68/FCER1G/HP/CTSC/LTA4H/LYZ/SERPINA1/OLR1/PYCARD/S100A9/CST3/LAMTOR1/CSTB/CREG1/CFD/ALOX5/CTSB/SLC11A1/PSAP/CYBA/MNDA/CTSS/ALDOA/FABP5/CTSZ/GAA/BRI3/RAB5C/FCGR2A/FUCA1/STXBP2/HEXB/VAMP8/IDH1/LAMP1/AGPAT2/RNASET2/ASAH1/CD44	46	GO	LAM1: Cluster1
GO:0048002	GO:antigen processing and presentation of peptide antigen	24/189	189/18670	1.09312e-19	7.06595e-17	5.21247e-17	CTSD/HLA-DPA1/FCER1G/HLA-DPB1/CD74/HLA-DRB5/HLA-DRB1/HLA-DMA/HLA-DRA/HLA-DQA1/HLA-DMB/PYCARD/HLA-DQB1/NCF2/SLC11A1/CYBA/CTSS/PSMA7/FCGR1A/TREM2/VAMP8/HLA-B/CLTA/AP2S1	24	GO	LAM1: Cluster1
GO:0019882	GO:antigen processing and presentation	25/189	226/18670	5.46896e-19	2.94595e-16	2.17319e-16	CTSD/CD68/HLA-DPA1/FCER1G/HLA-DPB1/CD74/HLA-DRB5/HLA-DRB1/HLA-DMA/HLA-DRA/HLA-DQA1/HLA-DMB/PYCARD/HLA-DQB1/NCF2/SLC11A1/CYBA/CTSS/PSMA7/FCGR1A/TREM2/VAMP8/HLA-B/CLTA/AP2S1	25	GO	LAM1: Cluster1
GO:0002478	GO:antigen processing and presentation of exogenous peptide antigen	21/189	175/18670	7.74755e-17	3.57715e-14	2.63883e-14	CTSD/HLA-DPA1/FCER1G/HLA-DPB1/CD74/HLA-DRB5/HLA-DRB1/HLA-DMA/HLA-DRA/HLA-DQA1/HLA-DMB/HLA-DQB1/NCF2/CYBA/CTSS/PSMA7/FCGR1A/VAMP8/HLA-B/CLTA/AP2S1	21	GO	LAM1: Cluster1
GO:0019884	GO:antigen processing and presentation of exogenous antigen	21/189	182/18670	1.74663e-16	7.05639e-14	5.20542e-14	CTSD/HLA-DPA1/FCER1G/HLA-DPB1/CD74/HLA-DRB5/HLA-DRB1/HLA-DMA/HLA-DRA/HLA-DQA1/HLA-DMB/HLA-DQB1/NCF2/CYBA/CTSS/PSMA7/FCGR1A/VAMP8/HLA-B/CLTA/AP2S1	21	GO	LAM1: Cluster1
GO:0002495	GO:antigen processing and presentation of peptide antigen via MHC class II	17/189	101/18670	2.26473e-16	8.13289e-14	5.99954e-14	CTSD/HLA-DPA1/FCER1G/HLA-DPB1/CD74/HLA-DRB5/HLA-DRB1/HLA-DMA/HLA-DRA/HLA-DQA1/HLA-DMB/PYCARD/HLA-DQB1/CTSS/TREM2/CLTA/AP2S1	17	GO	LAM1: Cluster1
GO:0002504	GO:antigen processing and presentation of peptide or polysaccharide antigen via MHC class II	17/189	102/18670	2.69396e-16	8.70688e-14	6.42297e-14	CTSD/HLA-DPA1/FCER1G/HLA-DPB1/CD74/HLA-DRB5/HLA-DRB1/HLA-DMA/HLA-DRA/HLA-DQA1/HLA-DMB/PYCARD/HLA-DQB1/CTSS/TREM2/CLTA/AP2S1	17	GO	LAM1: Cluster1
GO:0019886	GO:antigen processing and presentation of exogenous peptide antigen via MHC class II	15/189	98/18670	6.01861e-14	1.76838e-11	1.30451e-11	CTSD/HLA-DPA1/FCER1G/HLA-DPB1/CD74/HLA-DRB5/HLA-DRB1/HLA-DMA/HLA-DRA/HLA-DQA1/HLA-DMB/HLA-DQB1/CTSS/CLTA/AP2S1	15	GO	LAM1: Cluster1
GO:0034341	GO:response to interferon-gamma	18/189	199/18670	1.8963e-12	5.10737e-10	3.76765e-10	HLA-DPA1/CXCL16/HLA-DPB1/HLA-DRB5/HLA-DRB1/HLA-DRA/AIF1/HLA-DQA1/HLA-DQB1/SLC11A1/PPARG/VIM/FCGR1A/STXBP2/HLA-B/LGALS9/CD44/CCL18	18	GO	LAM1: Cluster1
GO:0016042	GO:lipid catabolic process	21/189	333/18670	2.6474e-11	6.58185e-09	4.85536e-09	APOC1/FABP4/APOE/LPL/PLD3/CES1/ECHDC1/CYP27A1/ABHD5/PLBD1/PSAP/PLAAT3/LIPA/FABP5/DECR1/HADH/FUCA1/HEXB/PHYH/IDH1/ASAH1	21	GO	LAM1: Cluster1
GO:0071346	GO:cellular response to interferon-gamma	16/189	180/18670	4.40998e-11	1.01808e-08	7.51023e-09	HLA-DPA1/HLA-DPB1/HLA-DRB5/HLA-DRB1/HLA-DRA/AIF1/HLA-DQA1/HLA-DQB1/PPARG/VIM/FCGR1A/STXBP2/HLA-B/LGALS9/CD44/CCL18	16	GO	LAM1: Cluster1
GO:0050727	GO:regulation of inflammatory response	24/189	485/18670	1.45605e-10	3.1373e-08	2.31435e-08	C1QB/C1QA/FABP4/VSIG4/C1QC/GRN/ACP5/APOE/LPL/FCER1G/CTSC/SERPING1/PYCARD/S100A9/GPX1/GPX4/TMSB4X/PPARG/CEBPA/CEBPB/TREM2/VAMP8/NUPR1/CCL18	24	GO	LAM1: Cluster1
GO:0060333	GO:interferon-gamma-mediated signaling pathway	11/189	91/18670	2.0003e-09	4.0406e-07	2.98071e-07	HLA-DPA1/HLA-DPB1/HLA-DRB5/HLA-DRB1/HLA-DRA/HLA-DQA1/HLA-DQB1/PPARG/FCGR1A/HLA-B/CD44	11	GO	LAM1: Cluster1
GO:0032103	GO:positive regulation of response to external stimulus	18/189	323/18670	5.32515e-09	1.0124e-06	7.4684e-07	FABP4/GRN/LPL/FCER1G/CTSC/CD74/AIF1/S100A9/TMSB4X/CYBA/CEBPA/CEBPB/LY86/TREM2/VAMP8/NUPR1/LGALS9/CCL18	18	GO	LAM1: Cluster1
GO:0044242	GO:cellular lipid catabolic process	15/189	217/18670	6.00354e-09	1.07797e-06	7.95206e-07	APOC1/FABP4/APOE/LPL/ECHDC1/ABHD5/PSAP/FABP5/DECR1/HADH/FUCA1/HEXB/PHYH/IDH1/ASAH1	15	GO	LAM1: Cluster1
GO:0051235	GO:maintenance of location	18/189	330/18670	7.44316e-09	1.26612e-06	9.34003e-07	FTL/FTH1/APOE/LPL/TSPO/ABHD5/S100A9/ANXA5/TMSB4X/MSR1/CYBA/PPARG/GSTO1/GAA/TXN/HEXB/PLIN2/TMSB10	18	GO	LAM1: Cluster1
GO:0050670	GO:regulation of lymphocyte proliferation	14/189	208/18670	2.74839e-08	4.4414e-06	3.27637e-06	TYROBP/VSIG4/LGALS3/HLA-DPA1/HLA-DPB1/CD74/AIF1/HLA-DMB/PYCARD/GPNMB/LST1/MNDA/CEBPB/LGALS9	14	GO	LAM1: Cluster1
GO:0032944	GO:regulation of mononuclear cell proliferation	14/189	209/18670	2.91989e-08	4.49385e-06	3.31506e-06	TYROBP/VSIG4/LGALS3/HLA-DPA1/HLA-DPB1/CD74/AIF1/HLA-DMB/PYCARD/GPNMB/LST1/MNDA/CEBPB/LGALS9	14	GO	LAM1: Cluster1
GO:0042116	GO:macrophage activation	10/189	95/18670	4.2718e-08	6.27566e-06	4.62949e-06	C1QA/TYROBP/VSIG4/GRN/CTSC/CD74/AIF1/SLC11A1/CEBPA/TREM2	10	GO	LAM1: Cluster1
GO:0050729	GO:positive regulation of inflammatory response	12/189	153/18670	5.19871e-08	7.30531e-06	5.38905e-06	FABP4/GRN/LPL/FCER1G/CTSC/S100A9/CEBPA/CEBPB/TREM2/VAMP8/NUPR1/CCL18	12	GO	LAM1: Cluster1
GO:0070663	GO:regulation of leukocyte proliferation	14/189	222/18670	6.22463e-08	8.3825e-06	6.18368e-06	TYROBP/VSIG4/LGALS3/HLA-DPA1/HLA-DPB1/CD74/AIF1/HLA-DMB/PYCARD/GPNMB/LST1/MNDA/CEBPB/LGALS9	14	GO	LAM1: Cluster1
GO:0070661	GO:leukocyte proliferation	16/189	298/18670	6.55932e-08	8.47989e-06	6.25552e-06	TYROBP/VSIG4/LGALS3/HLA-DPA1/HLA-DPB1/CD74/AIF1/HLA-DMB/PYCARD/GPNMB/SLC11A1/LST1/MNDA/CEBPB/TREM2/LGALS9	16	GO	LAM1: Cluster1
GO:0006631	GO:fatty acid metabolic process	18/189	383/18670	7.28767e-08	8.9007e-06	6.56595e-06	APOC1/LPL/ALOX5AP/CD74/LTA4H/CES1/ECHDC1/ABHD5/GPX1/GPX4/ALOX5/PPARG/FABP5/DECR1/ACOT2/HADH/PHYH/SCD	18	GO	LAM1: Cluster1
GO:0002576	GO:platelet degranulation	11/189	128/18670	7.43561e-08	8.9007e-06	6.56595e-06	FCER1G/SERPING1/SERPINA1/CFD/ANXA5/TMSB4X/LGALS3BP/PSAP/ALDOA/STXBP2/VTI1B	11	GO	LAM1: Cluster1
GO:0046651	GO:lymphocyte proliferation	15/189	272/18670	1.21338e-07	1.38298e-05	1.02021e-05	TYROBP/VSIG4/LGALS3/HLA-DPA1/HLA-DPB1/CD74/AIF1/HLA-DMB/PYCARD/GPNMB/SLC11A1/LST1/MNDA/CEBPB/LGALS9	15	GO	LAM1: Cluster1
GO:0050866	GO:negative regulation of cell activation	13/189	199/18670	1.24092e-07	1.38298e-05	1.02021e-05	TYROBP/VSIG4/LGALS3/GRN/APOE/CD74/GPNMB/LST1/MNDA/HMOX1/CEBPB/INHBA/LGALS9	13	GO	LAM1: Cluster1
GO:0032943	GO:mononuclear cell proliferation	15/189	274/18670	1.33457e-07	1.43778e-05	1.06063e-05	TYROBP/VSIG4/LGALS3/HLA-DPA1/HLA-DPB1/CD74/AIF1/HLA-DMB/PYCARD/GPNMB/SLC11A1/LST1/MNDA/CEBPB/LGALS9	15	GO	LAM1: Cluster1
GO:0006909	GO:phagocytosis	17/189	369/18670	2.26727e-07	2.29703e-05	1.69449e-05	MARCO/TYROBP/FCER1G/AIF1/PYCARD/TULP1/NCF2/MSR1/SLC11A1/FCGR3A/CYBA/PPARG/ARPC3/FCGR1A/FCGR2A/TREM2/ARPC1B	17	GO	LAM1: Cluster1
GO:0002695	GO:negative regulation of leukocyte activation	12/189	175/18670	2.27429e-07	2.29703e-05	1.69449e-05	TYROBP/VSIG4/LGALS3/GRN/CD74/GPNMB/LST1/MNDA/HMOX1/CEBPB/INHBA/LGALS9	12	GO	LAM1: Cluster1
GO:0034381	GO:plasma lipoprotein particle clearance	8/189	69/18670	4.69164e-07	4.59496e-05	3.38965e-05	APOC1/APOE/LRPAP1/MSR1/LIPA/HMOX1/CLTA/AP2S1	8	GO	LAM1: Cluster1
GO:0046364	GO:monosaccharide biosynthetic process	9/189	98/18670	6.68737e-07	6.35694e-05	4.68944e-05	TKT/FBP1/AKR1B1/TALDO1/PGD/GPD1/ALDOA/RBP4/G6PD	9	GO	LAM1: Cluster1
GO:0045088	GO:regulation of innate immune response	18/189	452/18670	8.33897e-07	7.70044e-05	5.68053e-05	MARCO/VSIG4/GRN/APOE/FCER1G/UBB/SERPING1/PYCARD/S100A9/CTSB/CYBA/PPARG/MNDA/CTSS/PSMA7/TREM2/LGALS9/LAMP1	18	GO	LAM1: Cluster1
GO:0097006	GO:regulation of plasma lipoprotein particle levels	9/189	101/18670	8.64624e-07	7.76241e-05	5.72624e-05	APOC1/APOE/LPL/LRPAP1/MSR1/LIPA/HMOX1/CLTA/AP2S1	9	GO	LAM1: Cluster1
GO:0098869	GO:cellular oxidant detoxification	9/189	102/18670	9.401e-07	8.2119e-05	6.05783e-05	APOE/HP/ALOX5AP/S100A9/GPX1/GPX4/GSTO1/MGST3/TXN	9	GO	LAM1: Cluster1
GO:0002697	GO:regulation of immune effector process	18/189	458/18670	1.00748e-06	8.56891e-05	6.32119e-05	C1QB/C1QA/VSIG4/LGALS3/C1QC/GRN/FCER1G/CD74/HLA-DMB/SERPING1/PYCARD/HMOX1/RBP4/STXBP2/VAMP8/HLA-B/LGALS9/LAMP1	18	GO	LAM1: Cluster1
GO:0030100	GO:regulation of endocytosis	14/189	281/18670	1.09717e-06	9.09244e-05	6.70739e-05	APOC1/LGALS3/APOE/FCER1G/PYCARD/LRPAP1/TULP1/SLC11A1/CYBA/PPARG/RAB5C/TREM2/DAB2/AP2S1	14	GO	LAM1: Cluster1
GO:0002573	GO:myeloid leukocyte differentiation	12/189	204/18670	1.17392e-06	9.27461e-05	6.84178e-05	TYROBP/C1QC/FCER1G/CD74/SPI1/PPARG/SNX10/CEBPA/CEBPB/TREM2/INHBA/EVI2B	12	GO	LAM1: Cluster1
GO:0002683	GO:negative regulation of immune system process	18/189	463/18670	1.17654e-06	9.27461e-05	6.84178e-05	TYROBP/VSIG4/LGALS3/C1QC/GRN/CD68/FCER1G/CD74/SERPING1/GPX1/GPNMB/LST1/PPARG/MNDA/HMOX1/CEBPB/INHBA/LGALS9	18	GO	LAM1: Cluster1
GO:0002577	GO:regulation of antigen processing and presentation	5/189	20/18670	1.38177e-06	0.000106331	7.84389e-05	CD68/CD74/PYCARD/SLC11A1/TREM2	5	GO	LAM1: Cluster1
GO:1990748	GO:cellular detoxification	9/189	112/18670	2.06776e-06	0.000155418	0.00011465	APOE/HP/ALOX5AP/S100A9/GPX1/GPX4/GSTO1/MGST3/TXN	9	GO	LAM1: Cluster1
GO:0051250	GO:negative regulation of lymphocyte activation	10/189	146/18670	2.39682e-06	0.000176057	0.000129875	TYROBP/VSIG4/LGALS3/CD74/GPNMB/LST1/MNDA/CEBPB/INHBA/LGALS9	10	GO	LAM1: Cluster1
GO:0002526	GO:acute inflammatory response	12/189	220/18670	2.58679e-06	0.000185789	0.000137055	C1QB/C1QA/VSIG4/C1QC/FCER1G/HP/TREM1/SERPING1/SERPINA1/PPARG/CEBPB/NUPR1	12	GO	LAM1: Cluster1
GO:0042098	GO:T cell proliferation	11/189	184/18670	2.82846e-06	0.00019873	0.000146601	VSIG4/LGALS3/HLA-DPA1/HLA-DPB1/AIF1/HLA-DMB/PYCARD/GPNMB/SLC11A1/CEBPB/LGALS9	11	GO	LAM1: Cluster1
GO:0098883	GO:synapse pruning	4/189	11/18670	3.17593e-06	0.000218396	0.000161108	C1QB/C1QA/C1QC/TREM2	4	GO	LAM1: Cluster1
GO:0032602	GO:chemokine production	8/189	89/18670	3.33543e-06	0.000224586	0.000165674	LPL/CD74/AIF1/PYCARD/S100A9/HMOX1/TREM2/LGALS9	8	GO	LAM1: Cluster1
GO:0032675	GO:regulation of interleukin-6 production	10/189	152/18670	3.4462e-06	0.000227308	0.000167683	TYROBP/LPL/FCER1G/CD74/AIF1/PYCARD/CYBA/CEBPB/TREM2/LGALS9	10	GO	LAM1: Cluster1
GO:0042129	GO:regulation of T cell proliferation	10/189	156/18670	4.34955e-06	0.000281155	0.000207405	VSIG4/LGALS3/HLA-DPA1/HLA-DPB1/AIF1/HLA-DMB/PYCARD/GPNMB/CEBPB/LGALS9	10	GO	LAM1: Cluster1
GO:0046394	GO:carboxylic acid biosynthetic process	17/189	462/18670	4.92438e-06	0.000312071	0.000230211	APOC1/FBP1/LPL/ALOX5AP/CD74/LTA4H/CYP27A1/GPX4/ALOX5/GLUL/GPD1/MGST3/ALDOA/FABP5/APIP/NUPR1/SCD	17	GO	LAM1: Cluster1
GO:0016053	GO:organic acid biosynthetic process	17/189	463/18670	5.06724e-06	0.000314948	0.000232334	APOC1/FBP1/LPL/ALOX5AP/CD74/LTA4H/CYP27A1/GPX4/ALOX5/GLUL/GPD1/MGST3/ALDOA/FABP5/APIP/NUPR1/SCD	17	GO	LAM1: Cluster1
GO:0001819	GO:positive regulation of cytokine production	17/189	464/18670	5.21381e-06	0.000317944	0.000234544	TYROBP/HLA-DPA1/LPL/FCER1G/HLA-DPB1/CD74/AIF1/PYCARD/SLC11A1/CYBA/MNDA/HMOX1/RGCC/CEBPB/TREM2/LGALS9/AGPAT2	17	GO	LAM1: Cluster1
GO:0051651	GO:maintenance of location in cell	8/189	95/18670	5.45151e-06	0.000320352	0.00023632	FTL/FTH1/APOE/TSPO/TMSB4X/GAA/TXN/TMSB10	8	GO	LAM1: Cluster1
GO:0032680	GO:regulation of tumor necrosis factor production	10/189	160/18670	5.45154e-06	0.000320352	0.00023632	TYROBP/ACP5/LPL/FCER1G/TSPO/PYCARD/GPNMB/CYBA/TREM2/LGALS9	10	GO	LAM1: Cluster1
GO:0019915	GO:lipid storage	7/189	68/18670	5.61091e-06	0.000323829	0.000238885	APOE/LPL/ABHD5/MSR1/PPARG/HEXB/PLIN2	7	GO	LAM1: Cluster1
GO:0032635	GO:interleukin-6 production	10/189	161/18670	5.76213e-06	0.000326723	0.00024102	TYROBP/LPL/FCER1G/CD74/AIF1/PYCARD/CYBA/CEBPB/TREM2/LGALS9	10	GO	LAM1: Cluster1
GO:0032755	GO:positive regulation of interleukin-6 production	8/189	96/18670	5.89613e-06	0.000328557	0.000242373	TYROBP/LPL/FCER1G/CD74/AIF1/PYCARD/CYBA/LGALS9	8	GO	LAM1: Cluster1
GO:0032640	GO:tumor necrosis factor production	10/189	163/18670	6.42955e-06	0.000346338	0.00025549	TYROBP/ACP5/LPL/FCER1G/TSPO/PYCARD/GPNMB/CYBA/TREM2/LGALS9	10	GO	LAM1: Cluster1
GO:1903555	GO:regulation of tumor necrosis factor superfamily cytokine production	10/189	163/18670	6.42955e-06	0.000346338	0.00025549	TYROBP/ACP5/LPL/FCER1G/TSPO/PYCARD/GPNMB/CYBA/TREM2/LGALS9	10	GO	LAM1: Cluster1
GO:0043300	GO:regulation of leukocyte degranulation	6/189	46/18670	6.64981e-06	0.000352331	0.000259911	FCER1G/HMOX1/STXBP2/VAMP8/LGALS9/LAMP1	6	GO	LAM1: Cluster1
GO:0050766	GO:positive regulation of phagocytosis	7/189	70/18670	6.82101e-06	0.000355573	0.000262302	FCER1G/PYCARD/TULP1/SLC11A1/CYBA/PPARG/TREM2	7	GO	LAM1: Cluster1
GO:2001242	GO:regulation of intrinsic apoptotic signaling pathway	10/189	165/18670	7.16286e-06	0.000367466	0.000271076	CD74/UBB/PYCARD/S100A9/GPX1/PTPMT1/GRINA/VDAC2/NUPR1/CD44	10	GO	LAM1: Cluster1
GO:0098754	GO:detoxification	9/189	131/18670	7.54516e-06	0.000381031	0.000281082	APOE/HP/ALOX5AP/S100A9/GPX1/GPX4/GSTO1/MGST3/TXN	9	GO	LAM1: Cluster1
GO:0097193	GO:intrinsic apoptotic signaling pathway	13/189	289/18670	8.15819e-06	0.00040128	0.00029602	CD74/UBB/PYCARD/S100A9/GPX1/PTPMT1/PHLDA3/GRINA/HMOX1/VDAC2/CEBPB/NUPR1/CD44	13	GO	LAM1: Cluster1
GO:0071706	GO:tumor necrosis factor superfamily cytokine production	10/189	168/18670	8.3982e-06	0.00040128	0.00029602	TYROBP/ACP5/LPL/FCER1G/TSPO/PYCARD/GPNMB/CYBA/TREM2/LGALS9	10	GO	LAM1: Cluster1
GO:0097237	GO:cellular response to toxic substance	12/189	247/18670	8.47038e-06	0.00040128	0.00029602	APOE/HP/ALOX5AP/SPI1/S100A9/GPX1/GPX4/PSAP/GSTO1/MGST3/HMOX1/TXN	12	GO	LAM1: Cluster1
GO:0001774	GO:microglial cell activation	6/189	48/18670	8.56693e-06	0.00040128	0.00029602	C1QA/TYROBP/GRN/CTSC/AIF1/TREM2	6	GO	LAM1: Cluster1
GO:0002269	GO:leukocyte activation involved in inflammatory response	6/189	48/18670	8.56693e-06	0.00040128	0.00029602	C1QA/TYROBP/GRN/CTSC/AIF1/TREM2	6	GO	LAM1: Cluster1
GO:0032945	GO:negative regulation of mononuclear cell proliferation	7/189	73/18670	9.03711e-06	0.000409098	0.000301787	TYROBP/VSIG4/GPNMB/LST1/MNDA/CEBPB/LGALS9	7	GO	LAM1: Cluster1
GO:0050672	GO:negative regulation of lymphocyte proliferation	7/189	73/18670	9.03711e-06	0.000409098	0.000301787	TYROBP/VSIG4/GPNMB/LST1/MNDA/CEBPB/LGALS9	7	GO	LAM1: Cluster1
GO:0005996	GO:monosaccharide metabolic process	13/189	292/18670	9.11357e-06	0.000409098	0.000301787	TKT/FBP1/AKR1B1/TALDO1/GSTO1/PGD/GPD1/ALDOA/FABP5/GAA/RBP4/FUCA1/G6PD	13	GO	LAM1: Cluster1
GO:0001818	GO:negative regulation of cytokine production	13/189	296/18670	1.05403e-05	0.000466659	0.000344249	TYROBP/VSIG4/ACP5/TSPO/PYCARD/TMSB4X/GPNMB/SLC11A1/HMOX1/RGCC/TREM2/INHBA/LGALS9	13	GO	LAM1: Cluster1
GO:0150076	GO:neuroinflammatory response	7/189	75/18670	1.08229e-05	0.000472697	0.000348703	C1QA/TYROBP/GRN/CTSC/AIF1/TREM2/NUPR1	7	GO	LAM1: Cluster1
GO:0072330	GO:monocarboxylic acid biosynthetic process	14/189	343/18670	1.10078e-05	0.000474361	0.000349931	APOC1/FBP1/LPL/ALOX5AP/CD74/LTA4H/CYP27A1/GPX4/ALOX5/GPD1/ALDOA/FABP5/NUPR1/SCD	14	GO	LAM1: Cluster1
GO:0006641	GO:triglyceride metabolic process	8/189	105/18670	1.1474e-05	0.000487947	0.000359953	APOC1/FABP4/APOE/LPL/ABHD5/GPX1/PLAAT3/FABP5	8	GO	LAM1: Cluster1
GO:0006098	GO:pentose-phosphate shunt	4/189	15/18670	1.27261e-05	0.000527318	0.000388996	TKT/TALDO1/PGD/G6PD	4	GO	LAM1: Cluster1
GO:0019321	GO:pentose metabolic process	4/189	15/18670	1.27261e-05	0.000527318	0.000388996	TKT/TALDO1/PGD/G6PD	4	GO	LAM1: Cluster1
GO:0050900	GO:leukocyte migration	17/189	499/18670	1.34662e-05	0.000550922	0.000406409	LGALS3/CXCL16/FCER1G/CD74/TREM1/AIF1/OLR1/PYCARD/S100A9/DOK2/BSG/HMOX1/SLC7A7/TREM2/LGALS9/CD44/CCL18	17	GO	LAM1: Cluster1
GO:0043304	GO:regulation of mast cell degranulation	5/189	31/18670	1.38344e-05	0.000558911	0.000412303	FCER1G/HMOX1/STXBP2/VAMP8/LGALS9	5	GO	LAM1: Cluster1
GO:0070664	GO:negative regulation of leukocyte proliferation	7/189	78/18670	1.40426e-05	0.000560316	0.000413339	TYROBP/VSIG4/GPNMB/LST1/MNDA/CEBPB/LGALS9	7	GO	LAM1: Cluster1
GO:0010876	GO:lipid localization	15/189	400/18670	1.45231e-05	0.000572422	0.00042227	APOC1/FABP4/APOE/LPL/TSPO/CES1/ABHD5/LAMTOR1/MSR1/PSAP/PPARG/RBP4/HEXB/PLIN2/INHBA	15	GO	LAM1: Cluster1
GO:0042590	GO:antigen processing and presentation of exogenous peptide antigen via MHC class I	7/189	79/18670	1.52773e-05	0.000594893	0.000438846	FCER1G/NCF2/CYBA/PSMA7/FCGR1A/VAMP8/HLA-B	7	GO	LAM1: Cluster1
GO:0006739	GO:NADP metabolic process	5/189	32/18670	1.62624e-05	0.000611162	0.000450848	TKT/TALDO1/PGD/G6PD/IDH1	5	GO	LAM1: Cluster1
GO:0033006	GO:regulation of mast cell activation involved in immune response	5/189	32/18670	1.62624e-05	0.000611162	0.000450848	FCER1G/HMOX1/STXBP2/VAMP8/LGALS9	5	GO	LAM1: Cluster1
GO:0055094	GO:response to lipoprotein particle	5/189	32/18670	1.62624e-05	0.000611162	0.000450848	CD68/APOE/LPL/FCER1G/PPARG	5	GO	LAM1: Cluster1
GO:0006959	GO:humoral immune response	14/189	356/18670	1.66925e-05	0.000618268	0.00045609	C1QB/C1QA/VSIG4/C1QC/TREM1/LYZ/SERPING1/HLA-DQB1/S100A9/CFD/SLC11A1/HMGN2/RGCC/TREM2	14	GO	LAM1: Cluster1
GO:0019372	GO:lipoxygenase pathway	4/189	16/18670	1.6834e-05	0.000618268	0.00045609	ALOX5AP/GPX1/GPX4/ALOX5	4	GO	LAM1: Cluster1
GO:2001233	GO:regulation of apoptotic signaling pathway	15/189	406/18670	1.72913e-05	0.000627925	0.000463214	LGALS3/CTSC/CD74/UBB/PYCARD/S100A9/GPX1/PTPMT1/GRINA/HMOX1/VDAC2/INHBA/NUPR1/LGALS9/CD44	15	GO	LAM1: Cluster1
GO:0062012	GO:regulation of small molecule metabolic process	16/189	459/18670	1.84336e-05	0.000661972	0.000488329	APOC1/FBP1/APOE/TSPO/CD74/COMT/OAZ1/TMSB4X/PPARG/GPD1/FABP5/PSMA7/SLC7A7/TREM2/NUPR1/SCD	16	GO	LAM1: Cluster1
GO:0043030	GO:regulation of macrophage activation	6/189	55/18670	1.90841e-05	0.000670433	0.000494571	VSIG4/GRN/CTSC/CD74/CEBPA/TREM2	6	GO	LAM1: Cluster1
GO:0046456	GO:icosanoid biosynthetic process	6/189	55/18670	1.90841e-05	0.000670433	0.000494571	ALOX5AP/CD74/LTA4H/ALOX5/MGST3/FABP5	6	GO	LAM1: Cluster1
GO:0032642	GO:regulation of chemokine production	7/189	82/18670	1.95314e-05	0.000678769	0.00050072	LPL/CD74/AIF1/PYCARD/HMOX1/TREM2/LGALS9	7	GO	LAM1: Cluster1
GO:0006690	GO:icosanoid metabolic process	8/189	114/18670	2.09613e-05	0.000720713	0.000531662	ALOX5AP/CD74/LTA4H/GPX1/GPX4/ALOX5/MGST3/FABP5	8	GO	LAM1: Cluster1
GO:0071402	GO:cellular response to lipoprotein particle stimulus	5/189	34/18670	2.21052e-05	0.000752042	0.000554773	CD68/APOE/LPL/FCER1G/PPARG	5	GO	LAM1: Cluster1
GO:0030099	GO:myeloid cell differentiation	15/189	416/18670	2.29538e-05	0.000772565	0.000569913	TYROBP/LGALS3/C1QC/FCER1G/CD74/SPI1/PPARG/SNX10/CEBPA/CEBPB/TREM2/G6PD/INHBA/EVI2B/DNASE2	15	GO	LAM1: Cluster1
GO:0019362	GO:pyridine nucleotide metabolic process	10/189	189/18670	2.34256e-05	0.000772565	0.000569913	TKT/FBP1/TALDO1/MPC1/PGD/GPD1/ALDOA/G6PD/NUPR1/IDH1	10	GO	LAM1: Cluster1
GO:0046496	GO:nicotinamide nucleotide metabolic process	10/189	189/18670	2.34256e-05	0.000772565	0.000569913	TKT/FBP1/TALDO1/MPC1/PGD/GPD1/ALDOA/G6PD/NUPR1/IDH1	10	GO	LAM1: Cluster1
GO:0019433	GO:triglyceride catabolic process	5/189	35/18670	2.55787e-05	0.000831475	0.00061337	FABP4/APOE/LPL/ABHD5/FABP5	5	GO	LAM1: Cluster1
GO:0032722	GO:positive regulation of chemokine production	6/189	58/18670	2.59836e-05	0.000831475	0.00061337	LPL/CD74/AIF1/PYCARD/HMOX1/LGALS9	6	GO	LAM1: Cluster1
GO:0061900	GO:glial cell activation	6/189	58/18670	2.59836e-05	0.000831475	0.00061337	C1QA/TYROBP/GRN/CTSC/AIF1/TREM2	6	GO	LAM1: Cluster1
GO:0045807	GO:positive regulation of endocytosis	9/189	153/18670	2.62768e-05	0.000832614	0.00061421	APOE/FCER1G/PYCARD/TULP1/SLC11A1/CYBA/PPARG/TREM2/DAB2	9	GO	LAM1: Cluster1
GO:0002429	GO:immune response-activating cell surface receptor signaling pathway	16/189	473/18670	2.65611e-05	0.00083345	0.000614827	LGALS3/HLA-DPA1/FCER1G/HLA-DPB1/HLA-DRB5/HLA-DRB1/HLA-DRA/HLA-DQA1/HLA-DQB1/FCGR3A/MNDA/PSMA7/ARPC3/FCGR1A/FCGR2A/ARPC1B	16	GO	LAM1: Cluster1
GO:0097242	GO:amyloid-beta clearance	5/189	36/18670	2.94618e-05	0.000915581	0.000675414	MARCO/APOE/LRPAP1/MSR1/TREM2	5	GO	LAM1: Cluster1
GO:0072524	GO:pyridine-containing compound metabolic process	10/189	195/18670	3.06217e-05	0.000942565	0.00069532	TKT/FBP1/TALDO1/MPC1/PGD/GPD1/ALDOA/G6PD/NUPR1/IDH1	10	GO	LAM1: Cluster1
GO:0051048	GO:negative regulation of secretion	11/189	238/18670	3.20846e-05	0.000978277	0.000721664	APOE/CD74/COMT/ANXA5/TMSB4X/HMOX1/RGCC/HADH/INHBA/VAMP8/LGALS9	11	GO	LAM1: Cluster1
GO:0045730	GO:respiratory burst	5/189	37/18670	3.3787e-05	0.00101561	0.000749202	GRN/NCF2/SLC11A1/CD52/CYBA	5	GO	LAM1: Cluster1
GO:0008202	GO:steroid metabolic process	13/189	331/18670	3.40971e-05	0.00101561	0.000749202	APOC1/APOE/TSPO/CES1/CYP27A1/AKR1B1/COMT/LAMTOR1/LIPA/CEBPA/G6PD/SCD/ASAH1	13	GO	LAM1: Cluster1
GO:0002696	GO:positive regulation of leukocyte activation	14/189	380/18670	3.42516e-05	0.00101561	0.000749202	TYROBP/HLA-DPA1/FCER1G/HLA-DPB1/CTSC/CD74/AIF1/HLA-DMB/PYCARD/CEBPA/TREM2/VAMP8/LGALS9/LAMP1	14	GO	LAM1: Cluster1
GO:0032651	GO:regulation of interleukin-1 beta production	7/189	90/18670	3.58598e-05	0.00103622	0.000764407	TYROBP/ACP5/LPL/PYCARD/MNDA/TREM2/LGALS9	7	GO	LAM1: Cluster1
GO:0048871	GO:multicellular organismal homeostasis	16/189	485/18670	3.59086e-05	0.00103622	0.000764407	FABP4/ACP5/UBB/LYZ/AKR1B1/GPX1/TULP1/SLC11A1/LIPA/SNX10/FABP5/DECR1/HADH/RBP4/CEBPB/SCD	16	GO	LAM1: Cluster1
GO:0051249	GO:regulation of lymphocyte activation	16/189	485/18670	3.59086e-05	0.00103622	0.000764407	TYROBP/VSIG4/LGALS3/HLA-DPA1/HLA-DPB1/CD74/AIF1/HLA-DMB/PYCARD/GPNMB/LST1/MNDA/CEBPB/INHBA/LGALS9/LAMP1	16	GO	LAM1: Cluster1
GO:0007159	GO:leukocyte cell-cell adhesion	13/189	337/18670	4.10324e-05	0.0011736	0.000865751	VSIG4/LGALS3/HLA-DPA1/HLA-DPB1/CD74/AIF1/HLA-DMB/PYCARD/S100A9/GPNMB/CEBPB/LGALS9/CD44	13	GO	LAM1: Cluster1
GO:0019370	GO:leukotriene biosynthetic process	4/189	20/18670	4.34147e-05	0.00123084	0.000907981	ALOX5AP/LTA4H/ALOX5/MGST3	4	GO	LAM1: Cluster1
GO:0006633	GO:fatty acid biosynthetic process	9/189	164/18670	4.53645e-05	0.00126439	0.000932727	APOC1/LPL/ALOX5AP/CD74/LTA4H/GPX4/ALOX5/FABP5/SCD	9	GO	LAM1: Cluster1
GO:0006826	GO:iron ion transport	6/189	64/18670	4.57716e-05	0.00126439	0.000932727	FTL/FTH1/ATP6V0B/SLC11A1/ATP6V1F/ATP6V0D1	6	GO	LAM1: Cluster1
GO:0046503	GO:glycerolipid catabolic process	6/189	64/18670	4.57716e-05	0.00126439	0.000932727	APOC1/FABP4/APOE/LPL/ABHD5/FABP5	6	GO	LAM1: Cluster1
GO:0050867	GO:positive regulation of cell activation	14/189	394/18670	5.06946e-05	0.0013746	0.00101403	TYROBP/HLA-DPA1/FCER1G/HLA-DPB1/CTSC/CD74/AIF1/HLA-DMB/PYCARD/CEBPA/TREM2/VAMP8/LGALS9/LAMP1	14	GO	LAM1: Cluster1
GO:0006733	GO:oxidoreduction coenzyme metabolic process	10/189	207/18670	5.08215e-05	0.0013746	0.00101403	TKT/FBP1/TALDO1/MPC1/PGD/GPD1/ALDOA/G6PD/NUPR1/IDH1	10	GO	LAM1: Cluster1
GO:0006639	GO:acylglycerol metabolic process	8/189	129/18670	5.10373e-05	0.0013746	0.00101403	APOC1/FABP4/APOE/LPL/ABHD5/GPX1/PLAAT3/FABP5	8	GO	LAM1: Cluster1
GO:1901568	GO:fatty acid derivative metabolic process	9/189	167/18670	5.22485e-05	0.0013956	0.00102952	ALOX5AP/CD74/LTA4H/GPX1/GPX4/ALOX5/MGST3/FABP5/SCD	9	GO	LAM1: Cluster1
GO:0019682	GO:glyceraldehyde-3-phosphate metabolic process	4/189	21/18670	5.32067e-05	0.00140954	0.0010398	TKT/TALDO1/PGD/G6PD	4	GO	LAM1: Cluster1
GO:0006638	GO:neutral lipid metabolic process	8/189	130/18670	5.39192e-05	0.0014168	0.00104516	APOC1/FABP4/APOE/LPL/ABHD5/GPX1/PLAAT3/FABP5	8	GO	LAM1: Cluster1
GO:0002474	GO:antigen processing and presentation of peptide antigen via MHC class I	7/189	96/18670	5.43643e-05	0.00141698	0.00104529	FCER1G/NCF2/CYBA/PSMA7/FCGR1A/VAMP8/HLA-B	7	GO	LAM1: Cluster1
GO:0050764	GO:regulation of phagocytosis	7/189	98/18670	6.20371e-05	0.00160403	0.00118328	FCER1G/PYCARD/TULP1/SLC11A1/CYBA/PPARG/TREM2	7	GO	LAM1: Cluster1
GO:0033003	GO:regulation of mast cell activation	5/189	42/18670	6.329e-05	0.00162344	0.00119759	FCER1G/HMOX1/STXBP2/VAMP8/LGALS9	5	GO	LAM1: Cluster1
GO:0006732	GO:coenzyme metabolic process	14/189	403/18670	6.45955e-05	0.00164388	0.00121267	TKT/FBP1/TALDO1/MPC1/GSTO1/PGD/GPD1/ALDOA/ACOT2/APIP/G6PD/NUPR1/IDH1/SCD	14	GO	LAM1: Cluster1
GO:1903037	GO:regulation of leukocyte cell-cell adhesion	12/189	304/18670	6.53783e-05	0.0016508	0.00121778	VSIG4/LGALS3/HLA-DPA1/HLA-DPB1/CD74/AIF1/HLA-DMB/PYCARD/GPNMB/CEBPB/LGALS9/CD44	12	GO	LAM1: Cluster1
GO:1901570	GO:fatty acid derivative biosynthetic process	7/189	99/18670	6.61928e-05	0.00165841	0.00122339	ALOX5AP/CD74/LTA4H/ALOX5/MGST3/FABP5/SCD	7	GO	LAM1: Cluster1
GO:0070374	GO:positive regulation of ERK1 and ERK2 cascade	10/189	215/18670	6.98457e-05	0.00172617	0.00127338	MARCO/APOE/CD74/PYCARD/GPNMB/TREM2/LGALS9/CD44/GLIPR2/CCL18	10	GO	LAM1: Cluster1
GO:0030301	GO:cholesterol transport	7/189	100/18670	7.05733e-05	0.00172617	0.00127338	APOC1/APOE/TSPO/CES1/LAMTOR1/MSR1/PPARG	7	GO	LAM1: Cluster1
GO:0046461	GO:neutral lipid catabolic process	5/189	43/18670	7.10337e-05	0.00172617	0.00127338	FABP4/APOE/LPL/ABHD5/FABP5	5	GO	LAM1: Cluster1
GO:0046464	GO:acylglycerol catabolic process	5/189	43/18670	7.10337e-05	0.00172617	0.00127338	FABP4/APOE/LPL/ABHD5/FABP5	5	GO	LAM1: Cluster1
GO:0002699	GO:positive regulation of immune effector process	10/189	216/18670	7.26023e-05	0.00175113	0.00129179	FCER1G/CD74/HLA-DMB/HMOX1/RBP4/STXBP2/VAMP8/HLA-B/LGALS9/LAMP1	10	GO	LAM1: Cluster1
GO:0032611	GO:interleukin-1 beta production	7/189	101/18670	7.51878e-05	0.00180005	0.00132788	TYROBP/ACP5/LPL/PYCARD/MNDA/TREM2/LGALS9	7	GO	LAM1: Cluster1
GO:0032799	GO:low-density lipoprotein receptor particle metabolic process	4/189	23/18670	7.7484e-05	0.00183078	0.00135054	APOE/PPARG/CLTA/AP2S1	4	GO	LAM1: Cluster1
GO:0019216	GO:regulation of lipid metabolic process	14/189	410/18670	7.7604e-05	0.00183078	0.00135054	APOC1/APOE/TSPO/CD74/ABHD5/LAMTOR1/PSAP/PPARG/FABP5/MACROH2A1/PLIN2/IDH1/SCD/ASAH1	14	GO	LAM1: Cluster1
GO:0032652	GO:regulation of interleukin-1 production	7/189	103/18670	8.51564e-05	0.00199439	0.00147124	TYROBP/ACP5/LPL/PYCARD/MNDA/TREM2/LGALS9	7	GO	LAM1: Cluster1
GO:0045862	GO:positive regulation of proteolysis	13/189	363/18670	8.72899e-05	0.00202965	0.00149725	CTSD/GRN/APOE/CTSC/PCOLCE2/PYCARD/S100A9/PPARG/CEBPA/TREM2/NUPR1/LGALS9/DAB2	13	GO	LAM1: Cluster1
GO:0042771	GO:intrinsic apoptotic signaling pathway in response to DNA damage by p53 class mediator	5/189	45/18670	8.86942e-05	0.00204757	0.00151047	CD74/PYCARD/PHLDA3/NUPR1/CD44	5	GO	LAM1: Cluster1
GO:0006898	GO:receptor-mediated endocytosis	12/189	316/18670	9.44559e-05	0.00216512	0.00159718	APOC1/MARCO/APOE/CXCL16/FCER1G/HP/LRPAP1/MSR1/FCGR1A/CLTA/DAB2/AP2S1	12	GO	LAM1: Cluster1
GO:0032418	GO:lysosome localization	6/189	74/18670	0.000104019	0.00236752	0.0017465	FCER1G/LAMTOR1/HMOX1/STXBP2/VAMP8/LGALS9	6	GO	LAM1: Cluster1
GO:0051156	GO:glucose 6-phosphate metabolic process	4/189	25/18670	0.000108953	0.00245878	0.00181381	TKT/TALDO1/PGD/G6PD	4	GO	LAM1: Cluster1
GO:0043303	GO:mast cell degranulation	5/189	47/18670	0.00010955	0.00245878	0.00181381	FCER1G/HMOX1/STXBP2/VAMP8/LGALS9	5	GO	LAM1: Cluster1
GO:0006790	GO:sulfur compound metabolic process	13/189	372/18670	0.000111492	0.00248206	0.00183099	ETHE1/COMT/GPX1/GPX4/MPC1/GSTO1/MGST3/ACOT2/HEXB/APIP/G6PD/IDH1/SCD	13	GO	LAM1: Cluster1
GO:0002479	GO:antigen processing and presentation of exogenous peptide antigen via MHC class I, TAP-dependent	6/189	75/18670	0.000112123	0.00248206	0.00183099	NCF2/CYBA/PSMA7/FCGR1A/VAMP8/HLA-B	6	GO	LAM1: Cluster1
GO:0046916	GO:cellular transition metal ion homeostasis	7/189	108/18670	0.000114862	0.00252227	0.00186065	FTL/FTH1/S100A9/SLC11A1/HMOX1/ATP6V0D1/SLC31A2	7	GO	LAM1: Cluster1
GO:0002291	GO:T cell activation via T cell receptor contact with antigen bound to MHC molecule on antigen presenting cell	3/189	10/18670	0.000116281	0.00252227	0.00186065	LGALS3/HLA-DMB/LGALS9	3	GO	LAM1: Cluster1
GO:0034447	GO:very-low-density lipoprotein particle clearance	3/189	10/18670	0.000116281	0.00252227	0.00186065	APOC1/APOE/LRPAP1	3	GO	LAM1: Cluster1
GO:0043270	GO:positive regulation of ion transport	11/189	275/18670	0.000117541	0.00253262	0.00186829	LGALS3/APOE/TSPO/GLRX/TMSB4X/GSTO1/CTSS/CEBPB/TREM2/G6PD/VAMP8	11	GO	LAM1: Cluster1
GO:0045454	GO:cell redox homeostasis	6/189	76/18670	0.00012072	0.00257905	0.00190253	GPX1/GLRX/NCF2/SLC11A1/CYBA/TXN	6	GO	LAM1: Cluster1
GO:0002279	GO:mast cell activation involved in immune response	5/189	48/18670	0.000121292	0.00257905	0.00190253	FCER1G/HMOX1/STXBP2/VAMP8/LGALS9	5	GO	LAM1: Cluster1
GO:0097066	GO:response to thyroid hormone	4/189	26/18670	0.000127748	0.00269857	0.00199071	AKR1B1/ANXA5/CTSB/CTSS	4	GO	LAM1: Cluster1
GO:0002448	GO:mast cell mediated immunity	5/189	49/18670	0.000133975	0.00281173	0.00207418	FCER1G/HMOX1/STXBP2/VAMP8/LGALS9	5	GO	LAM1: Cluster1
GO:0072332	GO:intrinsic apoptotic signaling pathway by p53 class mediator	6/189	78/18670	0.000139481	0.00290841	0.0021455	CD74/UBB/PYCARD/PHLDA3/NUPR1/CD44	6	GO	LAM1: Cluster1
GO:0000041	GO:transition metal ion transport	7/189	112/18670	0.00014426	0.00296972	0.00219073	FTL/FTH1/ATP6V0B/SLC11A1/ATP6V1F/ATP6V0D1/SLC31A2	7	GO	LAM1: Cluster1
GO:0015918	GO:sterol transport	7/189	112/18670	0.00014426	0.00296972	0.00219073	APOC1/APOE/TSPO/CES1/LAMTOR1/MSR1/PPARG	7	GO	LAM1: Cluster1
GO:0050777	GO:negative regulation of immune response	8/189	150/18670	0.000147022	0.00300743	0.00221855	VSIG4/LGALS3/GRN/SERPING1/GPX1/PPARG/HMOX1/LGALS9	8	GO	LAM1: Cluster1
GO:0002604	GO:regulation of dendritic cell antigen processing and presentation	3/189	11/18670	0.000158695	0.0032258	0.00237963	CD68/CD74/SLC11A1	3	GO	LAM1: Cluster1
GO:0051452	GO:intracellular pH reduction	5/189	51/18670	0.000162365	0.00327977	0.00241945	GRN/ATP6V0B/SLC11A1/ATP6V1F/ATP6V0D1	5	GO	LAM1: Cluster1
GO:0032612	GO:interleukin-1 production	7/189	115/18670	0.000170086	0.00339332	0.00250321	TYROBP/ACP5/LPL/PYCARD/MNDA/TREM2/LGALS9	7	GO	LAM1: Cluster1
GO:0032963	GO:collagen metabolic process	7/189	115/18670	0.000170086	0.00339332	0.00250321	CTSD/CST3/CTSB/PPARG/VIM/CTSS/RGCC	7	GO	LAM1: Cluster1
GO:0032653	GO:regulation of interleukin-10 production	5/189	52/18670	0.000178176	0.00351137	0.0025903	TYROBP/FCER1G/PYCARD/TREM2/LGALS9	5	GO	LAM1: Cluster1
GO:0032731	GO:positive regulation of interleukin-1 beta production	5/189	52/18670	0.000178176	0.00351137	0.0025903	TYROBP/LPL/PYCARD/MNDA/LGALS9	5	GO	LAM1: Cluster1
GO:0044282	GO:small molecule catabolic process	14/189	445/18670	0.000182839	0.00358143	0.00264198	ALDH2/APOE/ECHDC1/CYP27A1/GLUL/PGD/ALDOA/DECR1/HADH/UPP1/HEXB/HNMT/PHYH/CD44	14	GO	LAM1: Cluster1
GO:0002761	GO:regulation of myeloid leukocyte differentiation	7/189	117/18670	0.000189292	0.0036855	0.00271875	TYROBP/C1QC/CD74/CEBPB/TREM2/INHBA/EVI2B	7	GO	LAM1: Cluster1
GO:0045851	GO:pH reduction	5/189	53/18670	0.000195135	0.0037765	0.00278588	GRN/ATP6V0B/SLC11A1/ATP6V1F/ATP6V0D1	5	GO	LAM1: Cluster1
GO:0006911	GO:phagocytosis, engulfment	7/189	118/18670	0.000199532	0.00383861	0.0028317	MARCO/FCER1G/AIF1/MSR1/PPARG/FCGR1A/TREM2	7	GO	LAM1: Cluster1
GO:1905952	GO:regulation of lipid localization	8/189	157/18670	0.000201162	0.00384708	0.00283795	APOC1/APOE/LPL/TSPO/ABHD5/LAMTOR1/MSR1/PPARG	8	GO	LAM1: Cluster1
GO:0002468	GO:dendritic cell antigen processing and presentation	3/189	12/18670	0.000210018	0.00396946	0.00292822	CD68/CD74/SLC11A1	3	GO	LAM1: Cluster1
GO:0010889	GO:regulation of sequestering of triglyceride	3/189	12/18670	0.000210018	0.00396946	0.00292822	LPL/ABHD5/PPARG	3	GO	LAM1: Cluster1
GO:0006636	GO:unsaturated fatty acid biosynthetic process	5/189	54/18670	0.000213297	0.004008	0.00295666	ALOX5AP/CD74/ALOX5/FABP5/SCD	5	GO	LAM1: Cluster1
GO:0052547	GO:regulation of peptidase activity	14/189	452/18670	0.000214612	0.0040094	0.00295769	CTSD/GRN/PCOLCE2/SERPING1/CSTA/SERPINA1/PYCARD/S100A9/CST3/GPX1/CSTB/PPARG/LGALS9/CD44	14	GO	LAM1: Cluster1
GO:0050852	GO:T cell receptor signaling pathway	9/189	202/18670	0.000222447	0.00413188	0.00304804	LGALS3/HLA-DPA1/HLA-DPB1/HLA-DRB5/HLA-DRB1/HLA-DRA/HLA-DQA1/HLA-DQB1/PSMA7	9	GO	LAM1: Cluster1
GO:0042180	GO:cellular ketone metabolic process	10/189	248/18670	0.00022502	0.00415579	0.00306568	APOC1/CD74/AKR1B1/COMT/OAZ1/PPARG/GPD1/FABP5/PSMA7/SLC7A7	10	GO	LAM1: Cluster1
GO:0002886	GO:regulation of myeloid leukocyte mediated immunity	5/189	55/18670	0.000232718	0.00424941	0.00313474	FCER1G/HMOX1/STXBP2/VAMP8/LGALS9	5	GO	LAM1: Cluster1
GO:0032613	GO:interleukin-10 production	5/189	55/18670	0.000232718	0.00424941	0.00313474	TYROBP/FCER1G/PYCARD/TREM2/LGALS9	5	GO	LAM1: Cluster1
GO:0032760	GO:positive regulation of tumor necrosis factor production	6/189	86/18670	0.000238819	0.0043363	0.00319884	TYROBP/LPL/FCER1G/PYCARD/CYBA/LGALS9	6	GO	LAM1: Cluster1
GO:0022407	GO:regulation of cell-cell adhesion	13/189	403/18670	0.000244457	0.00441389	0.00325608	VSIG4/LGALS3/HLA-DPA1/HLA-DPB1/CD74/AIF1/HLA-DMB/PYCARD/GPNMB/RGCC/CEBPB/LGALS9/CD44	13	GO	LAM1: Cluster1
GO:0070372	GO:regulation of ERK1 and ERK2 cascade	11/189	300/18670	0.00025038	0.00449572	0.00331644	MARCO/APOE/CD74/PYCARD/GPNMB/TREM2/APIP/LGALS9/CD44/GLIPR2/CCL18	11	GO	LAM1: Cluster1
GO:0006749	GO:glutathione metabolic process	5/189	56/18670	0.000253456	0.0045258	0.00333863	ETHE1/GPX1/GPX4/G6PD/IDH1	5	GO	LAM1: Cluster1
GO:0002449	GO:lymphocyte mediated immunity	12/189	352/18670	0.000257144	0.00456456	0.00336722	C1QB/C1QA/C1QC/FCER1G/CTSC/CD74/SERPING1/HLA-DQB1/SLC11A1/HLA-B/LGALS9/LAMP1	12	GO	LAM1: Cluster1
GO:0006691	GO:leukotriene metabolic process	4/189	31/18670	0.000258451	0.00456456	0.00336722	ALOX5AP/LTA4H/ALOX5/MGST3	4	GO	LAM1: Cluster1
GO:1903557	GO:positive regulation of tumor necrosis factor superfamily cytokine production	6/189	88/18670	0.000270723	0.00468365	0.00345508	TYROBP/LPL/FCER1G/PYCARD/CYBA/LGALS9	6	GO	LAM1: Cluster1
GO:0002281	GO:macrophage activation involved in immune response	3/189	13/18670	0.000270991	0.00468365	0.00345508	TYROBP/GRN/TREM2	3	GO	LAM1: Cluster1
GO:0010872	GO:regulation of cholesterol esterification	3/189	13/18670	0.000270991	0.00468365	0.00345508	APOC1/APOE/LAMTOR1	3	GO	LAM1: Cluster1
GO:0050872	GO:white fat cell differentiation	3/189	13/18670	0.000270991	0.00468365	0.00345508	FABP4/PPARG/CEBPA	3	GO	LAM1: Cluster1
GO:0042110	GO:T cell activation	14/189	464/18670	0.000280209	0.00481721	0.0035536	VSIG4/LGALS3/HLA-DPA1/FCER1G/HLA-DPB1/CD74/AIF1/HLA-DMB/PYCARD/GPNMB/SLC11A1/CEBPB/LGALS9/CD44	14	GO	LAM1: Cluster1
GO:2000778	GO:positive regulation of interleukin-6 secretion	4/189	32/18670	0.000293049	0.00499819	0.00368711	LPL/AIF1/PYCARD/LGALS9	4	GO	LAM1: Cluster1
GO:0016125	GO:sterol metabolic process	8/189	166/18670	0.000293829	0.00499819	0.00368711	APOC1/APOE/CES1/CYP27A1/LIPA/CEBPA/G6PD/SCD	8	GO	LAM1: Cluster1
GO:1903531	GO:negative regulation of secretion by cell	9/189	211/18670	0.000307106	0.00519668	0.00383353	APOE/ANXA5/TMSB4X/HMOX1/RGCC/HADH/INHBA/VAMP8/LGALS9	9	GO	LAM1: Cluster1
GO:0099024	GO:plasma membrane invagination	7/189	127/18670	0.000313363	0.00527494	0.00389126	MARCO/FCER1G/AIF1/MSR1/PPARG/FCGR1A/TREM2	7	GO	LAM1: Cluster1
GO:0001906	GO:cell killing	8/189	168/18670	0.000318547	0.00533443	0.00393515	TYROBP/CTSC/LYZ/HMGN2/STXBP2/HLA-B/LGALS9/LAMP1	8	GO	LAM1: Cluster1
GO:0032732	GO:positive regulation of interleukin-1 production	5/189	59/18670	0.000324153	0.00537263	0.00396333	TYROBP/LPL/PYCARD/MNDA/LGALS9	5	GO	LAM1: Cluster1
GO:0045824	GO:negative regulation of innate immune response	5/189	59/18670	0.000324153	0.00537263	0.00396333	VSIG4/GRN/SERPING1/PPARG/LGALS9	5	GO	LAM1: Cluster1
GO:0030851	GO:granulocyte differentiation	4/189	33/18670	0.000330848	0.00545562	0.00402455	C1QC/SPI1/CEBPA/EVI2B	4	GO	LAM1: Cluster1
GO:0016051	GO:carbohydrate biosynthetic process	9/189	214/18670	0.000340647	0.00558797	0.00412218	TKT/FBP1/AKR1B1/TALDO1/PGD/GPD1/ALDOA/RBP4/G6PD	9	GO	LAM1: Cluster1
GO:0032802	GO:low-density lipoprotein particle receptor catabolic process	3/189	14/18670	0.000342332	0.00558797	0.00412218	APOE/CLTA/AP2S1	3	GO	LAM1: Cluster1
GO:0006066	GO:alcohol metabolic process	12/189	364/18670	0.000348381	0.00565812	0.00417393	APOC1/ALDH2/APOE/CES1/CYP27A1/AKR1B1/GPD1/CEBPA/RBP4/G6PD/SCD/ASAH1	12	GO	LAM1: Cluster1
GO:0045576	GO:mast cell activation	5/189	60/18670	0.000350749	0.0056681	0.00418129	FCER1G/HMOX1/STXBP2/VAMP8/LGALS9	5	GO	LAM1: Cluster1
GO:0006869	GO:lipid transport	12/189	365/18670	0.000357088	0.00574184	0.00423569	APOC1/FABP4/APOE/TSPO/CES1/LAMTOR1/MSR1/PSAP/PPARG/RBP4/PLIN2/INHBA	12	GO	LAM1: Cluster1
GO:1901214	GO:regulation of neuron death	11/189	313/18670	0.000359288	0.00574861	0.00424069	C1QA/TYROBP/GRN/APOE/UBB/GPNMB/HMOX1/CTSZ/CEBPB/G6PD/NUPR1	11	GO	LAM1: Cluster1
GO:0050671	GO:positive regulation of lymphocyte proliferation	7/189	130/18670	0.000361173	0.00575031	0.00424194	HLA-DPA1/HLA-DPB1/CD74/AIF1/HLA-DMB/PYCARD/LGALS9	7	GO	LAM1: Cluster1
GO:0050863	GO:regulation of T cell activation	11/189	314/18670	0.000369103	0.00583553	0.0043048	VSIG4/LGALS3/HLA-DPA1/HLA-DPB1/CD74/AIF1/HLA-DMB/PYCARD/GPNMB/CEBPB/LGALS9	11	GO	LAM1: Cluster1
GO:0031330	GO:negative regulation of cellular catabolic process	10/189	264/18670	0.000370137	0.00583553	0.0043048	APOC1/FBP1/HP/TSPO/CST3/SLC11A1/YBX1/HMOX1/TREM2/NUPR1	10	GO	LAM1: Cluster1
GO:0032946	GO:positive regulation of mononuclear cell proliferation	7/189	131/18670	0.000378348	0.00588848	0.00434387	HLA-DPA1/HLA-DPB1/CD74/AIF1/HLA-DMB/PYCARD/LGALS9	7	GO	LAM1: Cluster1
GO:0055076	GO:transition metal ion homeostasis	7/189	131/18670	0.000378348	0.00588848	0.00434387	FTL/FTH1/S100A9/SLC11A1/HMOX1/ATP6V0D1/SLC31A2	7	GO	LAM1: Cluster1
GO:0006879	GO:cellular iron ion homeostasis	5/189	61/18670	0.000378962	0.00588848	0.00434387	FTL/FTH1/SLC11A1/HMOX1/ATP6V0D1	5	GO	LAM1: Cluster1
GO:0070371	GO:ERK1 and ERK2 cascade	11/189	317/18670	0.000399909	0.00618423	0.00456204	MARCO/APOE/CD74/PYCARD/GPNMB/TREM2/APIP/LGALS9/CD44/GLIPR2/CCL18	11	GO	LAM1: Cluster1
GO:0042102	GO:positive regulation of T cell proliferation	6/189	95/18670	0.000409555	0.00630324	0.00464983	HLA-DPA1/HLA-DPB1/AIF1/HLA-DMB/PYCARD/LGALS9	6	GO	LAM1: Cluster1
GO:0031668	GO:cellular response to extracellular stimulus	10/189	268/18670	0.000416622	0.00635294	0.00468649	CD68/LPL/AIF1/COMT/CYBA/PPARG/GLUL/HMOX1/UPP1/GABARAP	10	GO	LAM1: Cluster1
GO:0046466	GO:membrane lipid catabolic process	4/189	35/18670	0.000416715	0.00635294	0.00468649	PSAP/FUCA1/HEXB/ASAH1	4	GO	LAM1: Cluster1
GO:0006000	GO:fructose metabolic process	3/189	15/18670	0.000424734	0.00638484	0.00471002	FBP1/AKR1B1/ALDOA	3	GO	LAM1: Cluster1
GO:0030730	GO:sequestering of triglyceride	3/189	15/18670	0.000424734	0.00638484	0.00471002	LPL/ABHD5/PPARG	3	GO	LAM1: Cluster1
GO:0090197	GO:positive regulation of chemokine secretion	3/189	15/18670	0.000424734	0.00638484	0.00471002	LPL/AIF1/PYCARD	3	GO	LAM1: Cluster1
GO:0051047	GO:positive regulation of secretion	13/189	428/18670	0.000434346	0.0064991	0.00479431	LPL/FCER1G/AIF1/PYCARD/CYBA/GLUL/RGCC/RBP4/TREM2/INHBA/VAMP8/LGALS9/LAMP1	13	GO	LAM1: Cluster1
GO:0032371	GO:regulation of sterol transport	5/189	63/18670	0.000440497	0.00653067	0.0048176	APOC1/APOE/TSPO/LAMTOR1/PPARG	5	GO	LAM1: Cluster1
GO:0032374	GO:regulation of cholesterol transport	5/189	63/18670	0.000440497	0.00653067	0.0048176	APOC1/APOE/TSPO/LAMTOR1/PPARG	5	GO	LAM1: Cluster1
GO:0010324	GO:membrane invagination	7/189	135/18670	0.000453702	0.00669573	0.00493937	MARCO/FCER1G/AIF1/MSR1/PPARG/FCGR1A/TREM2	7	GO	LAM1: Cluster1
GO:0120162	GO:positive regulation of cold-induced thermogenesis	6/189	97/18670	0.000457969	0.00672797	0.00496315	FABP4/FABP5/DECR1/HADH/CEBPB/SCD	6	GO	LAM1: Cluster1
GO:0032733	GO:positive regulation of interleukin-10 production	4/189	36/18670	0.000465122	0.0067715	0.00499526	FCER1G/PYCARD/TREM2/LGALS9	4	GO	LAM1: Cluster1
GO:0042554	GO:superoxide anion generation	4/189	36/18670	0.000465122	0.0067715	0.00499526	TYROBP/ACP5/NCF2/CYBA	4	GO	LAM1: Cluster1
GO:0032729	GO:positive regulation of interferon-gamma production	5/189	65/18670	0.000509276	0.00738108	0.00544494	HLA-DPA1/HLA-DPB1/PYCARD/SLC11A1/LGALS9	5	GO	LAM1: Cluster1
GO:0010885	GO:regulation of cholesterol storage	3/189	16/18670	0.000518864	0.00742022	0.00547381	LPL/MSR1/PPARG	3	GO	LAM1: Cluster1
GO:0019377	GO:glycolipid catabolic process	3/189	16/18670	0.000518864	0.00742022	0.00547381	PSAP/FUCA1/HEXB	3	GO	LAM1: Cluster1
GO:0051238	GO:sequestering of metal ion	3/189	16/18670	0.000518864	0.00742022	0.00547381	FTL/FTH1/S100A9	3	GO	LAM1: Cluster1
GO:0010565	GO:regulation of cellular ketone metabolic process	8/189	181/18670	0.000523864	0.00745872	0.00550221	APOC1/CD74/COMT/OAZ1/PPARG/FABP5/PSMA7/SLC7A7	8	GO	LAM1: Cluster1
GO:0070665	GO:positive regulation of leukocyte proliferation	7/189	139/18670	0.000540583	0.00766301	0.00565292	HLA-DPA1/HLA-DPB1/CD74/AIF1/HLA-DMB/PYCARD/LGALS9	7	GO	LAM1: Cluster1
GO:0032496	GO:response to lipopolysaccharide	11/189	330/18670	0.00055955	0.00786289	0.00580037	CD68/ACP5/TSPO/PYCARD/COMT/SLC11A1/VIM/CEBPB/LY86/TREM2/LGALS9	11	GO	LAM1: Cluster1
GO:0042742	GO:defense response to bacterium	11/189	330/18670	0.00055955	0.00786289	0.00580037	GRN/ACP5/FCER1G/HP/LYZ/PYCARD/S100A9/SLC11A1/CYBA/CEBPB/TREM2	11	GO	LAM1: Cluster1
GO:0032649	GO:regulation of interferon-gamma production	6/189	101/18670	0.00056811	0.00794862	0.00586361	HLA-DPA1/HLA-DPB1/PYCARD/SLC11A1/INHBA/LGALS9	6	GO	LAM1: Cluster1
GO:0034433	GO:steroid esterification	3/189	17/18670	0.00062537	0.00863759	0.00637185	APOC1/APOE/LAMTOR1	3	GO	LAM1: Cluster1
GO:0034434	GO:sterol esterification	3/189	17/18670	0.00062537	0.00863759	0.00637185	APOC1/APOE/LAMTOR1	3	GO	LAM1: Cluster1
GO:0034435	GO:cholesterol esterification	3/189	17/18670	0.00062537	0.00863759	0.00637185	APOC1/APOE/LAMTOR1	3	GO	LAM1: Cluster1
GO:0072593	GO:reactive oxygen species metabolic process	10/189	284/18670	0.000653996	0.00899454	0.00663517	TYROBP/GCHFR/ACP5/HP/TSPO/AIF1/GPX1/NCF2/CYBA/G6PD	10	GO	LAM1: Cluster1
GO:0008630	GO:intrinsic apoptotic signaling pathway in response to DNA damage	6/189	104/18670	0.000663426	0.00908556	0.00670231	CD74/PYCARD/PHLDA3/HMOX1/NUPR1/CD44	6	GO	LAM1: Cluster1
GO:0006979	GO:response to oxidative stress	13/189	451/18670	0.000707891	0.00965361	0.00712136	APOE/HP/AIF1/GPX1/GPX4/NCF2/PSAP/CYBA/HMOX1/TXN/G6PD/MACROH2A1/IDH1	13	GO	LAM1: Cluster1
GO:0031669	GO:cellular response to nutrient levels	9/189	237/18670	0.000712127	0.00967056	0.00713387	CD68/LPL/COMT/CYBA/PPARG/GLUL/HMOX1/UPP1/GABARAP	9	GO	LAM1: Cluster1
GO:0032720	GO:negative regulation of tumor necrosis factor production	5/189	70/18670	0.000716455	0.00968863	0.0071472	ACP5/TSPO/GPNMB/TREM2/LGALS9	5	GO	LAM1: Cluster1
GO:0010878	GO:cholesterol storage	3/189	18/18670	0.000744872	0.0098665	0.00727841	LPL/MSR1/PPARG	3	GO	LAM1: Cluster1
GO:0034375	GO:high-density lipoprotein particle remodeling	3/189	18/18670	0.000744872	0.0098665	0.00727841	APOC1/APOE/LPL	3	GO	LAM1: Cluster1
GO:0090196	GO:regulation of chemokine secretion	3/189	18/18670	0.000744872	0.0098665	0.00727841	LPL/AIF1/PYCARD	3	GO	LAM1: Cluster1
GO:0150078	GO:positive regulation of neuroinflammatory response	3/189	18/18670	0.000744872	0.0098665	0.00727841	CTSC/TREM2/NUPR1	3	GO	LAM1: Cluster1
GO:1900221	GO:regulation of amyloid-beta clearance	3/189	18/18670	0.000744872	0.0098665	0.00727841	APOE/LRPAP1/TREM2	3	GO	LAM1: Cluster1
GO:0031348	GO:negative regulation of defense response	9/189	239/18670	0.000755954	0.00997242	0.00735654	VSIG4/GRN/ACP5/APOE/SERPING1/PYCARD/GPX1/PPARG/LGALS9	9	GO	LAM1: Cluster1
GO:0150077	GO:regulation of neuroinflammatory response	4/189	41/18670	0.000768751	0.0100438	0.0074092	GRN/CTSC/TREM2/NUPR1	4	GO	LAM1: Cluster1
GO:0002237	GO:response to molecule of bacterial origin	11/189	343/18670	0.0007693	0.0100438	0.0074092	CD68/ACP5/TSPO/PYCARD/COMT/SLC11A1/VIM/CEBPB/LY86/TREM2/LGALS9	11	GO	LAM1: Cluster1
GO:0001909	GO:leukocyte mediated cytotoxicity	6/189	107/18670	0.000770687	0.0100438	0.0074092	TYROBP/CTSC/STXBP2/HLA-B/LGALS9/LAMP1	6	GO	LAM1: Cluster1
GO:1903532	GO:positive regulation of secretion by cell	12/189	399/18670	0.000784804	0.0101867	0.00751461	LPL/FCER1G/AIF1/PYCARD/GLUL/RGCC/RBP4/TREM2/INHBA/VAMP8/LGALS9/LAMP1	12	GO	LAM1: Cluster1
GO:0002532	GO:production of molecular mediator involved in inflammatory response	5/189	72/18670	0.000814879	0.0104928	0.00774041	GRN/FCER1G/PYCARD/ALOX5/VAMP8	5	GO	LAM1: Cluster1
GO:1903556	GO:negative regulation of tumor necrosis factor superfamily cytokine production	5/189	72/18670	0.000814879	0.0104928	0.00774041	ACP5/TSPO/GPNMB/TREM2/LGALS9	5	GO	LAM1: Cluster1
GO:0097028	GO:dendritic cell differentiation	4/189	42/18670	0.00084301	0.0108119	0.00797585	SPI1/CEBPB/TREM2/LGALS9	4	GO	LAM1: Cluster1
GO:0008203	GO:cholesterol metabolic process	7/189	150/18670	0.000849216	0.0108485	0.00800281	APOC1/APOE/CES1/CYP27A1/CEBPA/G6PD/SCD	7	GO	LAM1: Cluster1
GO:0070997	GO:neuron death	11/189	348/18670	0.000865698	0.0110155	0.00812601	C1QA/TYROBP/GRN/APOE/UBB/GPNMB/HMOX1/CTSZ/CEBPB/G6PD/NUPR1	11	GO	LAM1: Cluster1
GO:0006694	GO:steroid biosynthetic process	8/189	196/18670	0.000882084	0.0111481	0.0082238	APOE/TSPO/CES1/CYP27A1/AKR1B1/G6PD/SCD/ASAH1	8	GO	LAM1: Cluster1
GO:0055088	GO:lipid homeostasis	7/189	151/18670	0.000883015	0.0111481	0.0082238	FABP4/APOE/LPL/ABHD5/LAMTOR1/PPARG/CEBPA	7	GO	LAM1: Cluster1
GO:0034383	GO:low-density lipoprotein particle clearance	4/189	43/18670	0.000922187	0.0115632	0.00853001	LIPA/HMOX1/CLTA/AP2S1	4	GO	LAM1: Cluster1
GO:0006081	GO:cellular aldehyde metabolic process	5/189	74/18670	0.000923049	0.0115632	0.00853001	TKT/TALDO1/PGD/G6PD/IDH1	5	GO	LAM1: Cluster1
GO:0048872	GO:homeostasis of number of cells	9/189	246/18670	0.000927015	0.011568	0.00853359	FCER1G/CD74/SPI1/LIPA/HMOX1/G6PD/INHBA/LGALS9/DNASE2	9	GO	LAM1: Cluster1
GO:0046890	GO:regulation of lipid biosynthetic process	8/189	198/18670	0.000941927	0.0117089	0.00863751	APOC1/APOE/TSPO/CD74/FABP5/IDH1/SCD/ASAH1	8	GO	LAM1: Cluster1
GO:0062013	GO:positive regulation of small molecule metabolic process	7/189	153/18670	0.000953794	0.011811	0.00871282	CD74/COMT/TMSB4X/PPARG/GPD1/TREM2/NUPR1	7	GO	LAM1: Cluster1
GO:0050868	GO:negative regulation of T cell activation	6/189	112/18670	0.000978696	0.0120731	0.00890618	VSIG4/LGALS3/CD74/GPNMB/CEBPB/LGALS9	6	GO	LAM1: Cluster1
GO:0046390	GO:ribose phosphate biosynthetic process	10/189	300/18670	0.000993591	0.0122102	0.00900734	FBP1/TMSB4X/MPC1/GPD1/ALDOA/UPP1/TREM2/G6PD/NUPR1/SCD	10	GO	LAM1: Cluster1
GO:0014002	GO:astrocyte development	4/189	44/18670	0.00100646	0.0122641	0.0090471	C1QA/GRN/VIM/TREM2	4	GO	LAM1: Cluster1
GO:0030225	GO:macrophage differentiation	4/189	44/18670	0.00100646	0.0122641	0.0090471	C1QC/SPI1/CEBPA/INHBA	4	GO	LAM1: Cluster1
GO:0019318	GO:hexose metabolic process	9/189	249/18670	0.00100936	0.0122641	0.0090471	FBP1/AKR1B1/GPD1/ALDOA/FABP5/GAA/RBP4/FUCA1/G6PD	9	GO	LAM1: Cluster1
GO:0032609	GO:interferon-gamma production	6/189	113/18670	0.00102503	0.0122717	0.00905269	HLA-DPA1/HLA-DPB1/PYCARD/SLC11A1/INHBA/LGALS9	6	GO	LAM1: Cluster1
GO:0046514	GO:ceramide catabolic process	3/189	20/18670	0.00102525	0.0122717	0.00905269	PSAP/HEXB/ASAH1	3	GO	LAM1: Cluster1
GO:0090195	GO:chemokine secretion	3/189	20/18670	0.00102525	0.0122717	0.00905269	LPL/AIF1/PYCARD	3	GO	LAM1: Cluster1
GO:1903978	GO:regulation of microglial cell activation	3/189	20/18670	0.00102525	0.0122717	0.00905269	GRN/CTSC/TREM2	3	GO	LAM1: Cluster1
GO:1902652	GO:secondary alcohol metabolic process	7/189	155/18670	0.00102897	0.0122717	0.00905269	APOC1/APOE/CES1/CYP27A1/CEBPA/G6PD/SCD	7	GO	LAM1: Cluster1
GO:0045637	GO:regulation of myeloid cell differentiation	9/189	251/18670	0.00106748	0.0126842	0.009357	TYROBP/LGALS3/C1QC/CD74/SPI1/CEBPB/TREM2/INHBA/EVI2B	9	GO	LAM1: Cluster1
GO:0046486	GO:glycerolipid metabolic process	12/189	414/18670	0.00107866	0.01277	0.00942031	APOC1/FABP4/APOE/LPL/ABHD5/GPX1/PTPMT1/PLBD1/PLAAT3/GPD1/FABP5/AGPAT2	12	GO	LAM1: Cluster1
GO:0046660	GO:female sex differentiation	6/189	115/18670	0.00112273	0.0132432	0.00976939	UBB/RBP4/CEBPB/INHBA/NUPR1/IDH1	6	GO	LAM1: Cluster1
GO:0097164	GO:ammonium ion metabolic process	8/189	205/18670	0.0011775	0.0138388	0.0102087	APOC1/AKR1B1/COMT/PLBD1/PLAAT3/FABP5/HNMT/ASAH1	8	GO	LAM1: Cluster1
GO:0007035	GO:vacuolar acidification	3/189	21/18670	0.00118725	0.0138728	0.0102338	GRN/SLC11A1/ATP6V0D1	3	GO	LAM1: Cluster1
GO:0010883	GO:regulation of lipid storage	4/189	46/18670	0.00119098	0.0138728	0.0102338	LPL/ABHD5/MSR1/PPARG	4	GO	LAM1: Cluster1
GO:0002673	GO:regulation of acute inflammatory response	7/189	159/18670	0.00119326	0.0138728	0.0102338	C1QB/C1QA/VSIG4/C1QC/FCER1G/SERPING1/PPARG	7	GO	LAM1: Cluster1
GO:0009895	GO:negative regulation of catabolic process	10/189	308/18670	0.0012111	0.0140296	0.0103495	APOC1/FBP1/HP/TSPO/CST3/SLC11A1/YBX1/HMOX1/TREM2/NUPR1	10	GO	LAM1: Cluster1
GO:0055072	GO:iron ion homeostasis	5/189	79/18670	0.00124	0.0143131	0.0105586	FTL/FTH1/SLC11A1/HMOX1/ATP6V0D1	5	GO	LAM1: Cluster1
GO:0070555	GO:response to interleukin-1	8/189	207/18670	0.00125279	0.0144093	0.0106296	UBB/PYCARD/CYBA/PSMA7/CEBPB/HNMT/LGALS9/CCL18	8	GO	LAM1: Cluster1
GO:0030574	GO:collagen catabolic process	4/189	47/18670	0.00129157	0.0147504	0.0108812	CTSD/CST3/CTSB/CTSS	4	GO	LAM1: Cluster1
GO:1903580	GO:positive regulation of ATP metabolic process	4/189	47/18670	0.00129157	0.0147504	0.0108812	TMSB4X/GPD1/TREM2/NUPR1	4	GO	LAM1: Cluster1
GO:0034612	GO:response to tumor necrosis factor	10/189	312/18670	0.00133361	0.0151769	0.0111958	FABP4/CXCL16/PYCARD/TMSB4X/CYBA/GPD1/CEBPA/PSMA7/ASAH1/CCL18	10	GO	LAM1: Cluster1
GO:0052548	GO:regulation of endopeptidase activity	12/189	425/18670	0.00134802	0.015287	0.0112771	CTSD/SERPING1/CSTA/SERPINA1/PYCARD/S100A9/CST3/GPX1/CSTB/PPARG/LGALS9/CD44	12	GO	LAM1: Cluster1
GO:0032928	GO:regulation of superoxide anion generation	3/189	22/18670	0.00136453	0.015313	0.0112962	TYROBP/ACP5/CYBA	3	GO	LAM1: Cluster1
GO:0051195	GO:negative regulation of cofactor metabolic process	3/189	22/18670	0.00136453	0.015313	0.0112962	FBP1/HP/NUPR1	3	GO	LAM1: Cluster1
GO:0071404	GO:cellular response to low-density lipoprotein particle stimulus	3/189	22/18670	0.00136453	0.015313	0.0112962	LPL/FCER1G/PPARG	3	GO	LAM1: Cluster1
GO:0043523	GO:regulation of neuron apoptotic process	8/189	210/18670	0.00137287	0.0153533	0.011326	TYROBP/GRN/APOE/HMOX1/CTSZ/CEBPB/G6PD/NUPR1	8	GO	LAM1: Cluster1
GO:0007031	GO:peroxisome organization	5/189	81/18670	0.00138697	0.0154575	0.0114029	UBB/PLAAT3/ACOT2/PHYH/IDH1	5	GO	LAM1: Cluster1
GO:0072604	GO:interleukin-6 secretion	4/189	48/18670	0.00139796	0.0154766	0.0114169	LPL/AIF1/PYCARD/LGALS9	4	GO	LAM1: Cluster1
GO:0002698	GO:negative regulation of immune effector process	6/189	120/18670	0.00139826	0.0154766	0.0114169	VSIG4/LGALS3/GRN/SERPING1/HMOX1/LGALS9	6	GO	LAM1: Cluster1
GO:0015850	GO:organic hydroxy compound transport	9/189	262/18670	0.0014376	0.0158578	0.0116981	APOC1/APOE/FCER1G/TSPO/CES1/LAMTOR1/MSR1/PPARG/RBP4	9	GO	LAM1: Cluster1
GO:0050851	GO:antigen receptor-mediated signaling pathway	10/189	316/18670	0.00146604	0.0161165	0.011889	LGALS3/HLA-DPA1/HLA-DPB1/HLA-DRB5/HLA-DRB1/HLA-DRA/HLA-DQA1/HLA-DQB1/MNDA/PSMA7	10	GO	LAM1: Cluster1
GO:0006644	GO:phospholipid metabolic process	12/189	430/18670	0.00148769	0.016299	0.0120236	APOC1/LPL/ABHD5/PTPMT1/GPX4/PLBD1/PLAAT3/GPD1/FABP5/HEXB/IDH1/AGPAT2	12	GO	LAM1: Cluster1
GO:0010712	GO:regulation of collagen metabolic process	4/189	49/18670	0.00151032	0.016491	0.0121653	CST3/PPARG/VIM/RGCC	4	GO	LAM1: Cluster1
GO:1903578	GO:regulation of ATP metabolic process	6/189	122/18670	0.00152185	0.016561	0.0122168	FBP1/TSPO/TMSB4X/GPD1/TREM2/NUPR1	6	GO	LAM1: Cluster1
GO:1903050	GO:regulation of proteolysis involved in cellular protein catabolic process	8/189	214/18670	0.00154703	0.0167785	0.0123773	APOE/CTSC/UBB/GPX1/CEBPA/TREM2/NUPR1/DAB2	8	GO	LAM1: Cluster1
GO:0032753	GO:positive regulation of interleukin-4 production	3/189	23/18670	0.00155758	0.0167804	0.0123787	FCER1G/CEBPB/LGALS9	3	GO	LAM1: Cluster1
GO:0051004	GO:regulation of lipoprotein lipase activity	3/189	23/18670	0.00155758	0.0167804	0.0123787	APOC1/LPL/ABHD5	3	GO	LAM1: Cluster1
GO:0002218	GO:activation of innate immune response	10/189	319/18670	0.00157224	0.0168819	0.0124536	MARCO/FCER1G/UBB/PYCARD/S100A9/CTSB/CYBA/MNDA/CTSS/PSMA7	10	GO	LAM1: Cluster1
GO:0051453	GO:regulation of intracellular pH	5/189	84/18670	0.00163099	0.0174548	0.0128762	GRN/ATP6V0B/SLC11A1/ATP6V1F/ATP6V0D1	5	GO	LAM1: Cluster1
GO:0019218	GO:regulation of steroid metabolic process	6/189	124/18670	0.00165359	0.0176383	0.0130116	APOC1/APOE/TSPO/LAMTOR1/SCD/ASAH1	6	GO	LAM1: Cluster1
GO:1903039	GO:positive regulation of leukocyte cell-cell adhesion	8/189	218/18670	0.00173828	0.0184807	0.013633	HLA-DPA1/HLA-DPB1/CD74/AIF1/HLA-DMB/PYCARD/LGALS9/CD44	8	GO	LAM1: Cluster1
GO:0043302	GO:positive regulation of leukocyte degranulation	3/189	24/18670	0.00176692	0.0187235	0.0138121	FCER1G/VAMP8/LAMP1	3	GO	LAM1: Cluster1
GO:0045089	GO:positive regulation of innate immune response	11/189	381/18670	0.00178526	0.0188561	0.0139099	MARCO/FCER1G/UBB/PYCARD/S100A9/CTSB/CYBA/MNDA/CTSS/PSMA7/LAMP1	11	GO	LAM1: Cluster1
GO:0002791	GO:regulation of peptide secretion	13/189	500/18670	0.00179287	0.0188747	0.0139237	APOE/LPL/CD74/AIF1/PYCARD/ANXA5/TMSB4X/GLUL/RGCC/HADH/RBP4/TREM2/LGALS9	13	GO	LAM1: Cluster1
GO:0016485	GO:protein processing	10/189	328/18670	0.00192886	0.0202405	0.0149312	C1QB/C1QA/VSIG4/C1QC/CES1/SERPING1/PYCARD/SEC11A/CTSS/CTSZ	10	GO	LAM1: Cluster1
GO:0001659	GO:temperature homeostasis	7/189	173/18670	0.00193574	0.020247	0.014936	FABP4/GPX1/FABP5/DECR1/HADH/CEBPB/SCD	7	GO	LAM1: Cluster1
GO:0002687	GO:positive regulation of leukocyte migration	6/189	128/18670	0.0019429	0.0202563	0.0149428	LGALS3/CD74/AIF1/PYCARD/TREM2/LGALS9	6	GO	LAM1: Cluster1
GO:2000482	GO:regulation of interleukin-8 secretion	3/189	25/18670	0.001993	0.0206667	0.0152456	PYCARD/TMSB4X/LGALS9	3	GO	LAM1: Cluster1
GO:0016054	GO:organic acid catabolic process	9/189	275/18670	0.00200144	0.0206667	0.0152456	ECHDC1/GLUL/PGD/DECR1/HADH/HEXB/HNMT/PHYH/CD44	9	GO	LAM1: Cluster1
GO:0046395	GO:carboxylic acid catabolic process	9/189	275/18670	0.00200144	0.0206667	0.0152456	ECHDC1/GLUL/PGD/DECR1/HADH/HEXB/HNMT/PHYH/CD44	9	GO	LAM1: Cluster1
GO:1903038	GO:negative regulation of leukocyte cell-cell adhesion	6/189	129/18670	0.00202086	0.020755	0.0153107	VSIG4/LGALS3/CD74/GPNMB/CEBPB/LGALS9	6	GO	LAM1: Cluster1
GO:0006968	GO:cellular defense response	4/189	53/18670	0.00202284	0.020755	0.0153107	TYROBP/NCF2/LGALS3BP/MNDA	4	GO	LAM1: Cluster1
GO:0030595	GO:leukocyte chemotaxis	8/189	224/18670	0.00205973	0.0209965	0.0154889	LGALS3/CXCL16/FCER1G/CD74/AIF1/S100A9/LGALS9/CCL18	8	GO	LAM1: Cluster1
GO:0006956	GO:complement activation	7/189	175/18670	0.00206587	0.0209965	0.0154889	C1QB/C1QA/VSIG4/C1QC/SERPING1/CFD/RGCC	7	GO	LAM1: Cluster1
GO:0046165	GO:alcohol biosynthetic process	7/189	175/18670	0.00206587	0.0209965	0.0154889	APOE/CES1/CYP27A1/AKR1B1/G6PD/SCD/ASAH1	7	GO	LAM1: Cluster1
GO:0002763	GO:positive regulation of myeloid leukocyte differentiation	4/189	54/18670	0.0021676	0.0219614	0.0162007	TYROBP/CD74/TREM2/EVI2B	4	GO	LAM1: Cluster1
GO:0030641	GO:regulation of cellular pH	5/189	90/18670	0.00221163	0.0223374	0.0164781	GRN/ATP6V0B/SLC11A1/ATP6V1F/ATP6V0D1	5	GO	LAM1: Cluster1
GO:0003081	GO:regulation of systemic arterial blood pressure by renin-angiotensin	3/189	26/18670	0.0022363	0.0224463	0.0165584	CES1/CYBA/CTSZ	3	GO	LAM1: Cluster1
GO:1903579	GO:negative regulation of ATP metabolic process	3/189	26/18670	0.0022363	0.0224463	0.0165584	FBP1/TSPO/NUPR1	3	GO	LAM1: Cluster1
GO:0045639	GO:positive regulation of myeloid cell differentiation	5/189	91/18670	0.00232133	0.0232277	0.0171348	TYROBP/CD74/TREM2/INHBA/EVI2B	5	GO	LAM1: Cluster1
GO:2001235	GO:positive regulation of apoptotic signaling pathway	7/189	179/18670	0.00234636	0.0234057	0.0172661	CTSC/UBB/PYCARD/S100A9/INHBA/NUPR1/LGALS9	7	GO	LAM1: Cluster1
GO:0051258	GO:protein polymerization	9/189	283/18670	0.00242814	0.0241402	0.017808	AIF1/PYCARD/CAPG/GPX4/TMSB4X/ARPC3/VDAC2/TMSB10/ARPC1B	9	GO	LAM1: Cluster1
GO:0019319	GO:hexose biosynthetic process	5/189	92/18670	0.00243494	0.0241402	0.017808	FBP1/AKR1B1/GPD1/ALDOA/RBP4	5	GO	LAM1: Cluster1
GO:0071496	GO:cellular response to external stimulus	10/189	339/18670	0.00245071	0.0242223	0.0178685	CD68/LPL/AIF1/COMT/CYBA/PPARG/GLUL/HMOX1/UPP1/GABARAP	10	GO	LAM1: Cluster1
GO:0022408	GO:negative regulation of cell-cell adhesion	7/189	181/18670	0.00249719	0.0243839	0.0179877	VSIG4/LGALS3/CD74/GPNMB/RGCC/CEBPB/LGALS9	7	GO	LAM1: Cluster1
GO:0032673	GO:regulation of interleukin-4 production	3/189	27/18670	0.00249724	0.0243839	0.0179877	FCER1G/CEBPB/LGALS9	3	GO	LAM1: Cluster1
GO:0043032	GO:positive regulation of macrophage activation	3/189	27/18670	0.00249724	0.0243839	0.0179877	CTSC/CEBPA/TREM2	3	GO	LAM1: Cluster1
GO:0048143	GO:astrocyte activation	3/189	27/18670	0.00249724	0.0243839	0.0179877	C1QA/GRN/TREM2	3	GO	LAM1: Cluster1
GO:0030041	GO:actin filament polymerization	7/189	182/18670	0.00257534	0.0250708	0.0184944	AIF1/PYCARD/CAPG/TMSB4X/ARPC3/TMSB10/ARPC1B	7	GO	LAM1: Cluster1
GO:0043525	GO:positive regulation of neuron apoptotic process	4/189	57/18670	0.00264452	0.0255137	0.0188212	TYROBP/GRN/CTSZ/NUPR1	4	GO	LAM1: Cluster1
GO:0045981	GO:positive regulation of nucleotide metabolic process	4/189	57/18670	0.00264452	0.0255137	0.0188212	TMSB4X/GPD1/TREM2/NUPR1	4	GO	LAM1: Cluster1
GO:1900544	GO:positive regulation of purine nucleotide metabolic process	4/189	57/18670	0.00264452	0.0255137	0.0188212	TMSB4X/GPD1/TREM2/NUPR1	4	GO	LAM1: Cluster1
GO:0061136	GO:regulation of proteasomal protein catabolic process	7/189	183/18670	0.00265537	0.0255421	0.0188421	APOE/UBB/GPX1/CEBPA/TREM2/NUPR1/DAB2	7	GO	LAM1: Cluster1
GO:1901216	GO:positive regulation of neuron death	5/189	94/18670	0.0026742	0.0256469	0.0189194	C1QA/TYROBP/GRN/CTSZ/NUPR1	5	GO	LAM1: Cluster1
GO:0034368	GO:protein-lipid complex remodeling	3/189	28/18670	0.00277624	0.0262363	0.0193542	APOC1/APOE/LPL	3	GO	LAM1: Cluster1
GO:0034369	GO:plasma lipoprotein particle remodeling	3/189	28/18670	0.00277624	0.0262363	0.0193542	APOC1/APOE/LPL	3	GO	LAM1: Cluster1
GO:0045408	GO:regulation of interleukin-6 biosynthetic process	3/189	28/18670	0.00277624	0.0262363	0.0193542	TYROBP/CD74/CEBPB	3	GO	LAM1: Cluster1
GO:0090383	GO:phagosome acidification	3/189	28/18670	0.00277624	0.0262363	0.0193542	ATP6V0B/ATP6V1F/ATP6V0D1	3	GO	LAM1: Cluster1
GO:1900543	GO:negative regulation of purine nucleotide metabolic process	3/189	28/18670	0.00277624	0.0262363	0.0193542	FBP1/TSPO/NUPR1	3	GO	LAM1: Cluster1
GO:1903076	GO:regulation of protein localization to plasma membrane	5/189	95/18670	0.00280001	0.0263838	0.019463	LGALS3/TREM2/VAMP8/DAB2/VTI1B	5	GO	LAM1: Cluster1
GO:0022900	GO:electron transport chain	7/189	186/18670	0.00290695	0.0272909	0.0201322	ALDH2/AKR1B1/GLRX/NCF2/CYBA/GPD1/NDUFS5	7	GO	LAM1: Cluster1
GO:0071356	GO:cellular response to tumor necrosis factor	9/189	291/18670	0.00292421	0.0272909	0.0201322	FABP4/PYCARD/TMSB4X/CYBA/GPD1/CEBPA/PSMA7/ASAH1/CCL18	9	GO	LAM1: Cluster1
GO:0008585	GO:female gonad development	5/189	96/18670	0.00293006	0.0272909	0.0201322	UBB/CEBPB/INHBA/NUPR1/IDH1	5	GO	LAM1: Cluster1
GO:2001169	GO:regulation of ATP biosynthetic process	5/189	96/18670	0.00293006	0.0272909	0.0201322	FBP1/TMSB4X/GPD1/TREM2/NUPR1	5	GO	LAM1: Cluster1
GO:0030258	GO:lipid modification	8/189	238/18670	0.00299249	0.0277789	0.0204922	APOC1/APOE/ECHDC1/LAMTOR1/PPARG/DECR1/HADH/PHYH	8	GO	LAM1: Cluster1
GO:0042130	GO:negative regulation of T cell proliferation	4/189	59/18670	0.00299964	0.0277789	0.0204922	VSIG4/GPNMB/CEBPB/LGALS9	4	GO	LAM1: Cluster1
GO:1903364	GO:positive regulation of cellular protein catabolic process	6/189	140/18670	0.00304307	0.0278269	0.0205276	APOE/CTSC/CEBPA/TREM2/NUPR1/DAB2	6	GO	LAM1: Cluster1
GO:0009260	GO:ribonucleotide biosynthetic process	9/189	293/18670	0.00305995	0.0278269	0.0205276	FBP1/TMSB4X/MPC1/GPD1/ALDOA/UPP1/TREM2/NUPR1/SCD	9	GO	LAM1: Cluster1
GO:0030316	GO:osteoclast differentiation	5/189	97/18670	0.00306441	0.0278269	0.0205276	TYROBP/FCER1G/SNX10/CEBPB/TREM2	5	GO	LAM1: Cluster1
GO:0051402	GO:neuron apoptotic process	8/189	239/18670	0.00306995	0.0278269	0.0205276	TYROBP/GRN/APOE/HMOX1/CTSZ/CEBPB/G6PD/NUPR1	8	GO	LAM1: Cluster1
GO:0034367	GO:protein-containing complex remodeling	3/189	29/18670	0.00307371	0.0278269	0.0205276	APOC1/APOE/LPL	3	GO	LAM1: Cluster1
GO:0042226	GO:interleukin-6 biosynthetic process	3/189	29/18670	0.00307371	0.0278269	0.0205276	TYROBP/CD74/CEBPB	3	GO	LAM1: Cluster1
GO:0045980	GO:negative regulation of nucleotide metabolic process	3/189	29/18670	0.00307371	0.0278269	0.0205276	FBP1/TSPO/NUPR1	3	GO	LAM1: Cluster1
GO:0072606	GO:interleukin-8 secretion	3/189	29/18670	0.00307371	0.0278269	0.0205276	PYCARD/TMSB4X/LGALS9	3	GO	LAM1: Cluster1
GO:0043902	GO:positive regulation of multi-organism process	7/189	188/18670	0.00308455	0.0278472	0.0205425	GRN/APOE/CD74/CYBA/LY86/INHBA/LGALS9	7	GO	LAM1: Cluster1
GO:0051260	GO:protein homooligomerization	10/189	351/18670	0.00314357	0.0283009	0.0208773	FBP1/APOE/FCER1G/ALOX5AP/PYCARD/GLUL/HMOX1/ALDOA/DECR1/APIP	10	GO	LAM1: Cluster1
GO:0050708	GO:regulation of protein secretion	12/189	472/18670	0.00320131	0.0285983	0.0210966	APOE/LPL/AIF1/PYCARD/ANXA5/TMSB4X/GLUL/RGCC/HADH/RBP4/TREM2/LGALS9	12	GO	LAM1: Cluster1
GO:0006885	GO:regulation of pH	5/189	98/18670	0.00320315	0.0285983	0.0210966	GRN/ATP6V0B/SLC11A1/ATP6V1F/ATP6V0D1	5	GO	LAM1: Cluster1
GO:2001243	GO:negative regulation of intrinsic apoptotic signaling pathway	5/189	98/18670	0.00320315	0.0285983	0.0210966	CD74/GPX1/GRINA/VDAC2/CD44	5	GO	LAM1: Cluster1
GO:0038094	GO:Fc-gamma receptor signaling pathway	6/189	142/18670	0.00326413	0.0289583	0.0213622	FCER1G/FCGR3A/ARPC3/FCGR1A/FCGR2A/ARPC1B	6	GO	LAM1: Cluster1
GO:1900542	GO:regulation of purine nucleotide metabolic process	6/189	142/18670	0.00326413	0.0289583	0.0213622	FBP1/TSPO/TMSB4X/GPD1/TREM2/NUPR1	6	GO	LAM1: Cluster1
GO:0071248	GO:cellular response to metal ion	7/189	190/18670	0.00327035	0.0289583	0.0213622	FABP4/FBP1/TSPO/ALOX5AP/ANXA5/HMOX1/CEBPA	7	GO	LAM1: Cluster1
GO:0019395	GO:fatty acid oxidation	5/189	99/18670	0.00334636	0.0292174	0.0215534	ECHDC1/PPARG/DECR1/HADH/PHYH	5	GO	LAM1: Cluster1
GO:0106106	GO:cold-induced thermogenesis	6/189	143/18670	0.00337904	0.0292174	0.0215534	FABP4/FABP5/DECR1/HADH/CEBPB/SCD	6	GO	LAM1: Cluster1
GO:0120161	GO:regulation of cold-induced thermogenesis	6/189	143/18670	0.00337904	0.0292174	0.0215534	FABP4/FABP5/DECR1/HADH/CEBPB/SCD	6	GO	LAM1: Cluster1
GO:0007040	GO:lysosome organization	4/189	61/18670	0.00338603	0.0292174	0.0215534	GRN/LAMTOR1/GAA/HEXB	4	GO	LAM1: Cluster1
GO:0080171	GO:lytic vacuole organization	4/189	61/18670	0.00338603	0.0292174	0.0215534	GRN/LAMTOR1/GAA/HEXB	4	GO	LAM1: Cluster1
GO:0010743	GO:regulation of macrophage derived foam cell differentiation	3/189	30/18670	0.00339002	0.0292174	0.0215534	LPL/MSR1/PPARG	3	GO	LAM1: Cluster1
GO:0042759	GO:long-chain fatty acid biosynthetic process	3/189	30/18670	0.00339002	0.0292174	0.0215534	LTA4H/GPX4/ALOX5	3	GO	LAM1: Cluster1
GO:0048147	GO:negative regulation of fibroblast proliferation	3/189	30/18670	0.00339002	0.0292174	0.0215534	FTH1/PPARG/NUPR1	3	GO	LAM1: Cluster1
GO:0050869	GO:negative regulation of B cell activation	3/189	30/18670	0.00339002	0.0292174	0.0215534	TYROBP/MNDA/INHBA	3	GO	LAM1: Cluster1
GO:0061082	GO:myeloid leukocyte cytokine production	3/189	30/18670	0.00339002	0.0292174	0.0215534	FCER1G/CD74/HMOX1	3	GO	LAM1: Cluster1
GO:0043112	GO:receptor metabolic process	7/189	192/18670	0.00346458	0.0297016	0.0219106	APOE/FCER1G/LAMTOR1/LRPAP1/PPARG/CLTA/AP2S1	7	GO	LAM1: Cluster1
GO:1901136	GO:carbohydrate derivative catabolic process	7/189	192/18670	0.00346458	0.0297016	0.0219106	CST3/PSAP/GPD1/UPP1/FUCA1/HEXB/CD44	7	GO	LAM1: Cluster1
GO:1904064	GO:positive regulation of cation transmembrane transport	6/189	144/18670	0.00349695	0.0298998	0.0220568	GLRX/TMSB4X/GSTO1/CTSS/TREM2/G6PD	6	GO	LAM1: Cluster1
GO:0006521	GO:regulation of cellular amino acid metabolic process	4/189	62/18670	0.00359135	0.030626	0.0225925	COMT/OAZ1/PSMA7/SLC7A7	4	GO	LAM1: Cluster1
GO:0002431	GO:Fc receptor mediated stimulatory signaling pathway	6/189	145/18670	0.00361789	0.0307711	0.0226995	FCER1G/FCGR3A/ARPC3/FCGR1A/FCGR2A/ARPC1B	6	GO	LAM1: Cluster1
GO:0034440	GO:lipid oxidation	5/189	101/18670	0.00364653	0.0308523	0.0227594	ECHDC1/PPARG/DECR1/HADH/PHYH	5	GO	LAM1: Cluster1
GO:0046545	GO:development of primary female sexual characteristics	5/189	101/18670	0.00364653	0.0308523	0.0227594	UBB/CEBPB/INHBA/NUPR1/IDH1	5	GO	LAM1: Cluster1
GO:0030149	GO:sphingolipid catabolic process	3/189	31/18670	0.00372554	0.0312752	0.0230714	PSAP/HEXB/ASAH1	3	GO	LAM1: Cluster1
GO:0042168	GO:heme metabolic process	3/189	31/18670	0.00372554	0.0312752	0.0230714	TSPO/BLVRA/HMOX1	3	GO	LAM1: Cluster1
GO:1902253	GO:regulation of intrinsic apoptotic signaling pathway by p53 class mediator	3/189	31/18670	0.00372554	0.0312752	0.0230714	CD74/UBB/CD44	3	GO	LAM1: Cluster1
GO:0006140	GO:regulation of nucleotide metabolic process	6/189	146/18670	0.0037419	0.0312952	0.0230861	FBP1/TSPO/TMSB4X/GPD1/TREM2/NUPR1	6	GO	LAM1: Cluster1
GO:1903362	GO:regulation of cellular protein catabolic process	8/189	247/18670	0.00374729	0.0312952	0.0230861	APOE/CTSC/UBB/GPX1/CEBPA/TREM2/NUPR1/DAB2	8	GO	LAM1: Cluster1
GO:2000377	GO:regulation of reactive oxygen species metabolic process	7/189	195/18670	0.00377227	0.0314226	0.0231801	TYROBP/ACP5/HP/TSPO/AIF1/CYBA/G6PD	7	GO	LAM1: Cluster1
GO:0002460	GO:adaptive immune response based on somatic recombination of immune receptors built from immunoglobulin superfamily domains	10/189	361/18670	0.00383325	0.0318186	0.0234722	C1QB/C1QA/C1QC/FCER1G/CTSC/CD74/SERPING1/HLA-DQB1/SLC11A1/HLA-B	10	GO	LAM1: Cluster1
GO:0046434	GO:organophosphate catabolic process	8/189	248/18670	0.00383949	0.0318186	0.0234722	APOC1/FBP1/GPX1/GPD1/ALDOA/UPP1/NUPR1/IDH1	8	GO	LAM1: Cluster1
GO:0002262	GO:myeloid cell homeostasis	6/189	147/18670	0.00386905	0.0319815	0.0235924	FCER1G/SPI1/HMOX1/G6PD/INHBA/DNASE2	6	GO	LAM1: Cluster1
GO:0002685	GO:regulation of leukocyte migration	7/189	196/18670	0.00387931	0.0319845	0.0235946	LGALS3/CD74/AIF1/PYCARD/HMOX1/TREM2/LGALS9	7	GO	LAM1: Cluster1
GO:0060326	GO:cell chemotaxis	9/189	304/18670	0.00389799	0.0320568	0.0236479	LGALS3/CXCL16/FCER1G/CD74/AIF1/S100A9/TMSB4X/LGALS9/CCL18	9	GO	LAM1: Cluster1
GO:0009156	GO:ribonucleoside monophosphate biosynthetic process	7/189	197/18670	0.00398865	0.03262	0.0240634	FBP1/TMSB4X/GPD1/ALDOA/UPP1/TREM2/NUPR1	7	GO	LAM1: Cluster1
GO:0010952	GO:positive regulation of peptidase activity	7/189	197/18670	0.00398865	0.03262	0.0240634	CTSD/GRN/PCOLCE2/PYCARD/S100A9/PPARG/LGALS9	7	GO	LAM1: Cluster1
GO:0002792	GO:negative regulation of peptide secretion	6/189	148/18670	0.00399938	0.03262	0.0240634	APOE/CD74/ANXA5/TMSB4X/RGCC/HADH	6	GO	LAM1: Cluster1
GO:0045600	GO:positive regulation of fat cell differentiation	4/189	64/18670	0.00402704	0.03262	0.0240634	LPL/PPARG/CEBPA/CEBPB	4	GO	LAM1: Cluster1
GO:0060135	GO:maternal process involved in female pregnancy	4/189	64/18670	0.00402704	0.03262	0.0240634	AKR1B1/CTSB/BSG/LGALS9	4	GO	LAM1: Cluster1
GO:2000378	GO:negative regulation of reactive oxygen species metabolic process	4/189	64/18670	0.00402704	0.03262	0.0240634	ACP5/HP/TSPO/G6PD	4	GO	LAM1: Cluster1
GO:0010038	GO:response to metal ion	10/189	364/18670	0.004062	0.0328209	0.0242116	C1QA/FABP4/FBP1/TSPO/ALOX5AP/ANXA5/BSG/HMOX1/CEBPA/G6PD	10	GO	LAM1: Cluster1
GO:0072376	GO:protein activation cascade	7/189	198/18670	0.00410031	0.0330479	0.024379	C1QB/C1QA/VSIG4/C1QC/SERPING1/CFD/RGCC	7	GO	LAM1: Cluster1
GO:0030593	GO:neutrophil chemotaxis	5/189	104/18670	0.00413231	0.0331405	0.0244474	LGALS3/FCER1G/CD74/S100A9/CCL18	5	GO	LAM1: Cluster1
GO:0032414	GO:positive regulation of ion transmembrane transporter activity	5/189	104/18670	0.00413231	0.0331405	0.0244474	GLRX/TMSB4X/GSTO1/CTSS/TREM2	5	GO	LAM1: Cluster1
GO:0016052	GO:carbohydrate catabolic process	7/189	199/18670	0.00421432	0.0337146	0.0248709	FBP1/PGD/GPD1/ALDOA/GAA/HEXB/NUPR1	7	GO	LAM1: Cluster1
GO:0051187	GO:cofactor catabolic process	4/189	65/18670	0.00425771	0.0339776	0.0250649	HP/GPX1/BLVRA/HMOX1	4	GO	LAM1: Cluster1
GO:0006002	GO:fructose 6-phosphate metabolic process	2/189	10/18670	0.00434863	0.0343638	0.0253498	FBP1/TALDO1	2	GO	LAM1: Cluster1
GO:0030388	GO:fructose 1,6-bisphosphate metabolic process	2/189	10/18670	0.00434863	0.0343638	0.0253498	FBP1/ALDOA	2	GO	LAM1: Cluster1
GO:0042989	GO:sequestering of actin monomers	2/189	10/18670	0.00434863	0.0343638	0.0253498	TMSB4X/TMSB10	2	GO	LAM1: Cluster1
GO:1900426	GO:positive regulation of defense response to bacterium	2/189	10/18670	0.00434863	0.0343638	0.0253498	GRN/CYBA	2	GO	LAM1: Cluster1
GO:0016999	GO:antibiotic metabolic process	6/189	151/18670	0.00440989	0.0347628	0.0256442	ALDH2/HP/AKR1B1/GPX1/CYBA/IDH1	6	GO	LAM1: Cluster1
GO:0002703	GO:regulation of leukocyte mediated immunity	7/189	201/18670	0.00444954	0.0347839	0.0256597	FCER1G/HMOX1/STXBP2/VAMP8/HLA-B/LGALS9/LAMP1	7	GO	LAM1: Cluster1
GO:0010039	GO:response to iron ion	3/189	33/18670	0.00445561	0.0347839	0.0256597	C1QA/HMOX1/G6PD	3	GO	LAM1: Cluster1
GO:0032633	GO:interleukin-4 production	3/189	33/18670	0.00445561	0.0347839	0.0256597	FCER1G/CEBPB/LGALS9	3	GO	LAM1: Cluster1
GO:0050718	GO:positive regulation of interleukin-1 beta secretion	3/189	33/18670	0.00445561	0.0347839	0.0256597	LPL/PYCARD/LGALS9	3	GO	LAM1: Cluster1
GO:0002286	GO:T cell activation involved in immune response	5/189	106/18670	0.00448079	0.0348962	0.0257425	LGALS3/FCER1G/HLA-DMB/SLC11A1/LGALS9	5	GO	LAM1: Cluster1
GO:0022409	GO:positive regulation of cell-cell adhesion	8/189	255/18670	0.00453501	0.0352335	0.0259914	HLA-DPA1/HLA-DPB1/CD74/AIF1/HLA-DMB/PYCARD/LGALS9/CD44	8	GO	LAM1: Cluster1
GO:0048608	GO:reproductive structure development	11/189	431/18670	0.00457022	0.0352574	0.026009	UBB/CTSB/PSAP/PPARG/BSG/CEBPA/RBP4/CEBPB/INHBA/NUPR1/IDH1	11	GO	LAM1: Cluster1
GO:0006575	GO:cellular modified amino acid metabolic process	7/189	202/18670	0.00457081	0.0352574	0.026009	ETHE1/GPX1/GPX4/PLAAT3/APIP/G6PD/IDH1	7	GO	LAM1: Cluster1
GO:0050870	GO:positive regulation of T cell activation	7/189	202/18670	0.00457081	0.0352574	0.026009	HLA-DPA1/HLA-DPB1/CD74/AIF1/HLA-DMB/PYCARD/LGALS9	7	GO	LAM1: Cluster1
GO:0062014	GO:negative regulation of small molecule metabolic process	5/189	107/18670	0.00466266	0.0358803	0.0264685	APOC1/FBP1/APOE/TSPO/NUPR1	5	GO	LAM1: Cluster1
GO:0042133	GO:neurotransmitter metabolic process	6/189	153/18670	0.00470032	0.0360842	0.0266189	GCHFR/ACP5/TSPO/AIF1/COMT/HNMT	6	GO	LAM1: Cluster1
GO:0006914	GO:autophagy	12/189	496/18670	0.00474386	0.0361731	0.0266845	TSPO/PYCARD/S100A9/LAMTOR1/ATP6V0B/PSAP/HMOX1/ATP6V0D1/TREM2/VAMP8/NUPR1/GABARAP	12	GO	LAM1: Cluster1
GO:0061919	GO:process utilizing autophagic mechanism	12/189	496/18670	0.00474386	0.0361731	0.0266845	TSPO/PYCARD/S100A9/LAMTOR1/ATP6V0B/PSAP/HMOX1/ATP6V0D1/TREM2/VAMP8/NUPR1/GABARAP	12	GO	LAM1: Cluster1
GO:0048662	GO:negative regulation of smooth muscle cell proliferation	4/189	67/18670	0.00474548	0.0361731	0.0266845	AIF1/COMT/PPARG/HMOX1	4	GO	LAM1: Cluster1
GO:0061458	GO:reproductive system development	11/189	434/18670	0.00481047	0.0365442	0.0269583	UBB/CTSB/PSAP/PPARG/BSG/CEBPA/RBP4/CEBPB/INHBA/NUPR1/IDH1	11	GO	LAM1: Cluster1
GO:0030004	GO:cellular monovalent inorganic cation homeostasis	5/189	108/18670	0.00484972	0.0365442	0.0269583	GRN/ATP6V0B/SLC11A1/ATP6V1F/ATP6V0D1	5	GO	LAM1: Cluster1
GO:0006090	GO:pyruvate metabolic process	6/189	154/18670	0.00485071	0.0365442	0.0269583	FBP1/MPC1/GPD1/BSG/ALDOA/NUPR1	6	GO	LAM1: Cluster1
GO:0055067	GO:monovalent inorganic cation homeostasis	6/189	154/18670	0.00485071	0.0365442	0.0269583	GRN/COMT/ATP6V0B/SLC11A1/ATP6V1F/ATP6V0D1	6	GO	LAM1: Cluster1
GO:1990845	GO:adaptive thermogenesis	6/189	154/18670	0.00485071	0.0365442	0.0269583	FABP4/FABP5/DECR1/HADH/CEBPB/SCD	6	GO	LAM1: Cluster1
GO:0031667	GO:response to nutrient levels	12/189	499/18670	0.00497264	0.0373425	0.0275471	CD68/APOE/LPL/TSPO/COMT/CYBA/PPARG/GLUL/HMOX1/UPP1/G6PD/GABARAP	12	GO	LAM1: Cluster1
GO:0006625	GO:protein targeting to peroxisome	4/189	68/18670	0.00500287	0.0373425	0.0275471	UBB/ACOT2/PHYH/IDH1	4	GO	LAM1: Cluster1
GO:0072662	GO:protein localization to peroxisome	4/189	68/18670	0.00500287	0.0373425	0.0275471	UBB/ACOT2/PHYH/IDH1	4	GO	LAM1: Cluster1
GO:0072663	GO:establishment of protein localization to peroxisome	4/189	68/18670	0.00500287	0.0373425	0.0275471	UBB/ACOT2/PHYH/IDH1	4	GO	LAM1: Cluster1
GO:0060249	GO:anatomical structure homeostasis	11/189	437/18670	0.00506065	0.0376866	0.027801	ACP5/LYZ/AKR1B1/TULP1/POLD4/LIPA/SNX10/ALDOA/GAA/NOP10/RBP4	11	GO	LAM1: Cluster1
GO:0008654	GO:phospholipid biosynthetic process	8/189	260/18670	0.00508838	0.0378061	0.0278891	ABHD5/PTPMT1/PLAAT3/GPD1/FABP5/HEXB/IDH1/AGPAT2	8	GO	LAM1: Cluster1
GO:0034767	GO:positive regulation of ion transmembrane transport	6/189	156/18670	0.00516206	0.0382655	0.028228	GLRX/TMSB4X/GSTO1/CTSS/TREM2/G6PD	6	GO	LAM1: Cluster1
GO:0033559	GO:unsaturated fatty acid metabolic process	5/189	110/18670	0.00523972	0.0383462	0.0282876	ALOX5AP/CD74/ALOX5/FABP5/SCD	5	GO	LAM1: Cluster1
GO:0032801	GO:receptor catabolic process	3/189	35/18670	0.00526649	0.0383462	0.0282876	APOE/CLTA/AP2S1	3	GO	LAM1: Cluster1
GO:0015909	GO:long-chain fatty acid transport	4/189	69/18670	0.00526947	0.0383462	0.0282876	FABP4/APOE/PPARG/PLIN2	4	GO	LAM1: Cluster1
GO:0043574	GO:peroxisomal transport	4/189	69/18670	0.00526947	0.0383462	0.0282876	UBB/ACOT2/PHYH/IDH1	4	GO	LAM1: Cluster1
GO:0002887	GO:negative regulation of myeloid leukocyte mediated immunity	2/189	11/18670	0.00527973	0.0383462	0.0282876	HMOX1/LGALS9	2	GO	LAM1: Cluster1
GO:0005984	GO:disaccharide metabolic process	2/189	11/18670	0.00527973	0.0383462	0.0282876	FBP1/GAA	2	GO	LAM1: Cluster1
GO:0070254	GO:mucus secretion	2/189	11/18670	0.00527973	0.0383462	0.0282876	CYBA/VAMP8	2	GO	LAM1: Cluster1
GO:0072608	GO:interleukin-10 secretion	2/189	11/18670	0.00527973	0.0383462	0.0282876	PYCARD/LGALS9	2	GO	LAM1: Cluster1
GO:1903980	GO:positive regulation of microglial cell activation	2/189	11/18670	0.00527973	0.0383462	0.0282876	CTSC/TREM2	2	GO	LAM1: Cluster1
GO:0009124	GO:nucleoside monophosphate biosynthetic process	7/189	208/18670	0.00535161	0.0387812	0.0286085	FBP1/TMSB4X/GPD1/ALDOA/UPP1/TREM2/NUPR1	7	GO	LAM1: Cluster1
GO:0006006	GO:glucose metabolic process	7/189	209/18670	0.00549091	0.039613	0.0292221	FBP1/GPD1/ALDOA/FABP5/GAA/RBP4/G6PD	7	GO	LAM1: Cluster1
GO:0008154	GO:actin polymerization or depolymerization	7/189	209/18670	0.00549091	0.039613	0.0292221	AIF1/PYCARD/CAPG/TMSB4X/ARPC3/TMSB10/ARPC1B	7	GO	LAM1: Cluster1
GO:0042176	GO:regulation of protein catabolic process	10/189	381/18670	0.00557013	0.040095	0.0295776	APOE/CTSC/UBB/CST3/GPX1/OAZ1/CEBPA/TREM2/NUPR1/DAB2	10	GO	LAM1: Cluster1
GO:0097529	GO:myeloid leukocyte migration	7/189	210/18670	0.00563291	0.0404211	0.0298182	LGALS3/FCER1G/CD74/AIF1/S100A9/TREM2/CCL18	7	GO	LAM1: Cluster1
GO:0032411	GO:positive regulation of transporter activity	5/189	112/18670	0.00565142	0.0404211	0.0298182	GLRX/TMSB4X/GSTO1/CTSS/TREM2	5	GO	LAM1: Cluster1
GO:0010742	GO:macrophage derived foam cell differentiation	3/189	36/18670	0.00570298	0.0404211	0.0298182	LPL/MSR1/PPARG	3	GO	LAM1: Cluster1
GO:0033572	GO:transferrin transport	3/189	36/18670	0.00570298	0.0404211	0.0298182	ATP6V0B/ATP6V1F/ATP6V0D1	3	GO	LAM1: Cluster1
GO:0090077	GO:foam cell differentiation	3/189	36/18670	0.00570298	0.0404211	0.0298182	LPL/MSR1/PPARG	3	GO	LAM1: Cluster1
GO:0090322	GO:regulation of superoxide metabolic process	3/189	36/18670	0.00570298	0.0404211	0.0298182	TYROBP/ACP5/CYBA	3	GO	LAM1: Cluster1
GO:2001171	GO:positive regulation of ATP biosynthetic process	3/189	36/18670	0.00570298	0.0404211	0.0298182	TMSB4X/GPD1/TREM2	3	GO	LAM1: Cluster1
GO:0006754	GO:ATP biosynthetic process	6/189	160/18670	0.0058284	0.0411297	0.0303409	FBP1/TMSB4X/GPD1/ALDOA/TREM2/NUPR1	6	GO	LAM1: Cluster1
GO:1903305	GO:regulation of regulated secretory pathway	6/189	160/18670	0.0058284	0.0411297	0.0303409	FCER1G/HMOX1/STXBP2/VAMP8/LGALS9/LAMP1	6	GO	LAM1: Cluster1
GO:0071219	GO:cellular response to molecule of bacterial origin	7/189	212/18670	0.00592516	0.0417214	0.0307774	CD68/TSPO/PYCARD/VIM/CEBPB/LY86/TREM2	7	GO	LAM1: Cluster1
GO:1901653	GO:cellular response to peptide	10/189	385/18670	0.0059817	0.0420279	0.0310035	LPL/AKR1B1/ATP6V0B/ANXA5/CYBA/PPARG/VIM/ATP6V1F/ATP6V0D1/TREM2	10	GO	LAM1: Cluster1
GO:0050714	GO:positive regulation of protein secretion	8/189	268/18670	0.00607964	0.0424943	0.0313476	LPL/AIF1/PYCARD/GLUL/RGCC/RBP4/TREM2/LGALS9	8	GO	LAM1: Cluster1
GO:0042035	GO:regulation of cytokine biosynthetic process	5/189	114/18670	0.00608545	0.0424943	0.0313476	TYROBP/CD74/HMOX1/CEBPB/INHBA	5	GO	LAM1: Cluster1
GO:0009165	GO:nucleotide biosynthetic process	10/189	386/18670	0.00608821	0.0424943	0.0313476	FBP1/TMSB4X/MPC1/GPD1/ALDOA/UPP1/TREM2/NUPR1/SCD/AGPAT2	10	GO	LAM1: Cluster1
GO:0032272	GO:negative regulation of protein polymerization	4/189	72/18670	0.00612589	0.0424943	0.0313476	CAPG/TMSB4X/VDAC2/TMSB10	4	GO	LAM1: Cluster1
GO:0030833	GO:regulation of actin filament polymerization	6/189	162/18670	0.00618417	0.0424943	0.0313476	PYCARD/CAPG/TMSB4X/ARPC3/TMSB10/ARPC1B	6	GO	LAM1: Cluster1
GO:0010506	GO:regulation of autophagy	9/189	327/18670	0.00622615	0.0424943	0.0313476	TSPO/PYCARD/LAMTOR1/ATP6V0B/PSAP/HMOX1/ATP6V0D1/TREM2/NUPR1	9	GO	LAM1: Cluster1
GO:0045732	GO:positive regulation of protein catabolic process	7/189	214/18670	0.00622859	0.0424943	0.0313476	APOE/CTSC/OAZ1/CEBPA/TREM2/NUPR1/DAB2	7	GO	LAM1: Cluster1
GO:0002002	GO:regulation of angiotensin levels in blood	2/189	12/18670	0.00629367	0.0424943	0.0313476	CES1/CTSZ	2	GO	LAM1: Cluster1
GO:0002003	GO:angiotensin maturation	2/189	12/18670	0.00629367	0.0424943	0.0313476	CES1/CTSZ	2	GO	LAM1: Cluster1
GO:0002921	GO:negative regulation of humoral immune response	2/189	12/18670	0.00629367	0.0424943	0.0313476	VSIG4/SERPING1	2	GO	LAM1: Cluster1
GO:0006662	GO:glycerol ether metabolic process	2/189	12/18670	0.00629367	0.0424943	0.0313476	PLAAT3/TXN	2	GO	LAM1: Cluster1
GO:0031392	GO:regulation of prostaglandin biosynthetic process	2/189	12/18670	0.00629367	0.0424943	0.0313476	CD74/FABP5	2	GO	LAM1: Cluster1
GO:0033700	GO:phospholipid efflux	2/189	12/18670	0.00629367	0.0424943	0.0313476	APOC1/APOE	2	GO	LAM1: Cluster1
GO:0034372	GO:very-low-density lipoprotein particle remodeling	2/189	12/18670	0.00629367	0.0424943	0.0313476	APOE/LPL	2	GO	LAM1: Cluster1
GO:0045080	GO:positive regulation of chemokine biosynthetic process	2/189	12/18670	0.00629367	0.0424943	0.0313476	CD74/HMOX1	2	GO	LAM1: Cluster1
GO:0070486	GO:leukocyte aggregation	2/189	12/18670	0.00629367	0.0424943	0.0313476	S100A9/CD44	2	GO	LAM1: Cluster1
GO:2000341	GO:regulation of chemokine (C-X-C motif) ligand 2 production	2/189	12/18670	0.00629367	0.0424943	0.0313476	LPL/CD74	2	GO	LAM1: Cluster1
GO:2001198	GO:regulation of dendritic cell differentiation	2/189	12/18670	0.00629367	0.0424943	0.0313476	CEBPB/LGALS9	2	GO	LAM1: Cluster1
GO:0030449	GO:regulation of complement activation	5/189	115/18670	0.00631103	0.0424943	0.0313476	C1QB/C1QA/VSIG4/C1QC/SERPING1	5	GO	LAM1: Cluster1
GO:1904375	GO:regulation of protein localization to cell periphery	5/189	115/18670	0.00631103	0.0424943	0.0313476	LGALS3/TREM2/VAMP8/DAB2/VTI1B	5	GO	LAM1: Cluster1
GO:0007033	GO:vacuole organization	6/189	163/18670	0.00636786	0.0427878	0.0315641	GRN/LAMTOR1/GAA/HEXB/NUPR1/GABARAP	6	GO	LAM1: Cluster1
GO:0043281	GO:regulation of cysteine-type endopeptidase activity involved in apoptotic process	7/189	215/18670	0.00638459	0.0428112	0.0315814	CTSD/PYCARD/S100A9/GPX1/PPARG/LGALS9/CD44	7	GO	LAM1: Cluster1
GO:0006801	GO:superoxide metabolic process	4/189	73/18670	0.00643071	0.0429423	0.0316781	TYROBP/ACP5/NCF2/CYBA	4	GO	LAM1: Cluster1
GO:0043627	GO:response to estrogen	4/189	73/18670	0.00643071	0.0429423	0.0316781	COMT/PPARG/HMOX1/ARPC1B	4	GO	LAM1: Cluster1
GO:1901293	GO:nucleoside phosphate biosynthetic process	10/189	390/18670	0.00652915	0.0435084	0.0320957	FBP1/TMSB4X/MPC1/GPD1/ALDOA/UPP1/TREM2/NUPR1/SCD/AGPAT2	10	GO	LAM1: Cluster1
GO:2000257	GO:regulation of protein activation cascade	5/189	116/18670	0.00654242	0.0435084	0.0320957	C1QB/C1QA/VSIG4/C1QC/SERPING1	5	GO	LAM1: Cluster1
GO:1902105	GO:regulation of leukocyte differentiation	8/189	272/18670	0.00662725	0.0437037	0.0322398	TYROBP/C1QC/CD74/CEBPB/TREM2/INHBA/EVI2B/LGALS9	8	GO	LAM1: Cluster1
GO:0006778	GO:porphyrin-containing compound metabolic process	3/189	38/18670	0.0066394	0.0437037	0.0322398	TSPO/BLVRA/HMOX1	3	GO	LAM1: Cluster1
GO:0015682	GO:ferric iron transport	3/189	38/18670	0.0066394	0.0437037	0.0322398	ATP6V0B/ATP6V1F/ATP6V0D1	3	GO	LAM1: Cluster1
GO:0050716	GO:positive regulation of interleukin-1 secretion	3/189	38/18670	0.0066394	0.0437037	0.0322398	LPL/PYCARD/LGALS9	3	GO	LAM1: Cluster1
GO:0072512	GO:trivalent inorganic cation transport	3/189	38/18670	0.0066394	0.0437037	0.0322398	ATP6V0B/ATP6V1F/ATP6V0D1	3	GO	LAM1: Cluster1
GO:0071241	GO:cellular response to inorganic substance	7/189	217/18670	0.00670531	0.0439541	0.0324245	FABP4/FBP1/TSPO/ALOX5AP/ANXA5/HMOX1/CEBPA	7	GO	LAM1: Cluster1
GO:0031670	GO:cellular response to nutrient	4/189	74/18670	0.00674544	0.0439541	0.0324245	LPL/CYBA/PPARG/HMOX1	4	GO	LAM1: Cluster1
GO:0032507	GO:maintenance of protein location in cell	4/189	74/18670	0.00674544	0.0439541	0.0324245	TSPO/TMSB4X/TXN/TMSB10	4	GO	LAM1: Cluster1
GO:0032677	GO:regulation of interleukin-8 production	4/189	74/18670	0.00674544	0.0439541	0.0324245	CD74/PYCARD/TMSB4X/LGALS9	4	GO	LAM1: Cluster1
GO:1901616	GO:organic hydroxy compound catabolic process	4/189	74/18670	0.00674544	0.0439541	0.0324245	ALDH2/APOE/CYP27A1/COMT	4	GO	LAM1: Cluster1
GO:0043542	GO:endothelial cell migration	8/189	273/18670	0.00676981	0.044	0.0324583	GRN/APOE/GPX1/TMSB4X/PPARG/GLUL/HMOX1/RGCC	8	GO	LAM1: Cluster1
GO:1900371	GO:regulation of purine nucleotide biosynthetic process	5/189	117/18670	0.0067797	0.044	0.0324583	FBP1/TMSB4X/GPD1/TREM2/NUPR1	5	GO	LAM1: Cluster1
GO:0016064	GO:immunoglobulin mediated immune response	7/189	218/18670	0.00687009	0.0444083	0.0327595	C1QB/C1QA/C1QC/FCER1G/CD74/SERPING1/HLA-DQB1	7	GO	LAM1: Cluster1
GO:0032271	GO:regulation of protein polymerization	7/189	218/18670	0.00687009	0.0444083	0.0327595	PYCARD/CAPG/TMSB4X/ARPC3/VDAC2/TMSB10/ARPC1B	7	GO	LAM1: Cluster1
GO:0030808	GO:regulation of nucleotide biosynthetic process	5/189	118/18670	0.00702294	0.0452154	0.0333549	FBP1/TMSB4X/GPD1/TREM2/NUPR1	5	GO	LAM1: Cluster1
GO:1990266	GO:neutrophil migration	5/189	118/18670	0.00702294	0.0452154	0.0333549	LGALS3/FCER1G/CD74/S100A9/CCL18	5	GO	LAM1: Cluster1
GO:0006695	GO:cholesterol biosynthetic process	4/189	75/18670	0.0070702	0.0454292	0.0335126	APOE/CES1/G6PD/SCD	4	GO	LAM1: Cluster1
GO:0051251	GO:positive regulation of lymphocyte activation	9/189	334/18670	0.00711349	0.045535	0.0335907	TYROBP/HLA-DPA1/HLA-DPB1/CD74/AIF1/HLA-DMB/PYCARD/LGALS9/LAMP1	9	GO	LAM1: Cluster1
GO:0010639	GO:negative regulation of organelle organization	10/189	395/18670	0.00711485	0.045535	0.0335907	TSPO/SPI1/CAPG/GPX1/TMSB4X/RGCC/MACROH2A1/NUPR1/TMSB10/PSMG2	10	GO	LAM1: Cluster1
GO:0051604	GO:protein maturation	10/189	397/18670	0.00736022	0.0461901	0.0340739	C1QB/C1QA/VSIG4/C1QC/CES1/SERPING1/PYCARD/SEC11A/CTSS/CTSZ	10	GO	LAM1: Cluster1
GO:0019724	GO:B cell mediated immunity	7/189	221/18670	0.00738253	0.0461901	0.0340739	C1QB/C1QA/C1QC/FCER1G/CD74/SERPING1/HLA-DQB1	7	GO	LAM1: Cluster1
GO:0006707	GO:cholesterol catabolic process	2/189	13/18670	0.0073887	0.0461901	0.0340739	APOE/CYP27A1	2	GO	LAM1: Cluster1
GO:0016127	GO:sterol catabolic process	2/189	13/18670	0.0073887	0.0461901	0.0340739	APOE/CYP27A1	2	GO	LAM1: Cluster1
GO:0033004	GO:negative regulation of mast cell activation	2/189	13/18670	0.0073887	0.0461901	0.0340739	HMOX1/LGALS9	2	GO	LAM1: Cluster1
GO:0043301	GO:negative regulation of leukocyte degranulation	2/189	13/18670	0.0073887	0.0461901	0.0340739	HMOX1/LGALS9	2	GO	LAM1: Cluster1
GO:0045820	GO:negative regulation of glycolytic process	2/189	13/18670	0.0073887	0.0461901	0.0340739	FBP1/NUPR1	2	GO	LAM1: Cluster1
GO:0060100	GO:positive regulation of phagocytosis, engulfment	2/189	13/18670	0.0073887	0.0461901	0.0340739	PPARG/TREM2	2	GO	LAM1: Cluster1
GO:0071285	GO:cellular response to lithium ion	2/189	13/18670	0.0073887	0.0461901	0.0340739	FABP4/CEBPA	2	GO	LAM1: Cluster1
GO:0090594	GO:inflammatory response to wounding	2/189	13/18670	0.0073887	0.0461901	0.0340739	GRN/HMOX1	2	GO	LAM1: Cluster1
GO:1900272	GO:negative regulation of long-term synaptic potentiation	2/189	13/18670	0.0073887	0.0461901	0.0340739	TYROBP/APOE	2	GO	LAM1: Cluster1
GO:1905155	GO:positive regulation of membrane invagination	2/189	13/18670	0.0073887	0.0461901	0.0340739	PPARG/TREM2	2	GO	LAM1: Cluster1
GO:1902653	GO:secondary alcohol biosynthetic process	4/189	76/18670	0.00740512	0.0462034	0.0340837	APOE/CES1/G6PD/SCD	4	GO	LAM1: Cluster1
GO:1903052	GO:positive regulation of proteolysis involved in cellular protein catabolic process	5/189	120/18670	0.00752761	0.0468635	0.0345707	CTSC/CEBPA/TREM2/NUPR1/DAB2	5	GO	LAM1: Cluster1
GO:0048660	GO:regulation of smooth muscle cell proliferation	6/189	169/18670	0.00755442	0.0468635	0.0345707	AIF1/AKR1B1/COMT/CYBA/PPARG/HMOX1	6	GO	LAM1: Cluster1
GO:0050728	GO:negative regulation of inflammatory response	6/189	169/18670	0.00755442	0.0468635	0.0345707	GRN/ACP5/APOE/PYCARD/GPX1/PPARG	6	GO	LAM1: Cluster1
GO:0001990	GO:regulation of systemic arterial blood pressure by hormone	3/189	40/18670	0.00766203	0.0473493	0.0349291	CES1/CYBA/CTSZ	3	GO	LAM1: Cluster1
GO:0072583	GO:clathrin-dependent endocytosis	3/189	40/18670	0.00766203	0.0473493	0.0349291	CLTA/DAB2/AP2S1	3	GO	LAM1: Cluster1
GO:0006809	GO:nitric oxide biosynthetic process	4/189	77/18670	0.00775034	0.0477126	0.035197	GCHFR/ACP5/TSPO/AIF1	4	GO	LAM1: Cluster1
GO:0048678	GO:response to axon injury	4/189	77/18670	0.00775034	0.0477126	0.035197	TYROBP/GRN/TSPO/AIF1	4	GO	LAM1: Cluster1
GO:0046718	GO:viral entry into host cell	5/189	121/18670	0.00778918	0.0478605	0.0353062	CD74/CTSB/VAMP8/LGALS9/LAMP1	5	GO	LAM1: Cluster1
GO:0009152	GO:purine ribonucleotide biosynthetic process	8/189	280/18670	0.00783382	0.0480435	0.0354411	FBP1/TMSB4X/MPC1/GPD1/ALDOA/TREM2/NUPR1/SCD	8	GO	LAM1: Cluster1
GO:0009206	GO:purine ribonucleoside triphosphate biosynthetic process	6/189	171/18670	0.00798321	0.0487746	0.0359805	FBP1/TMSB4X/GPD1/ALDOA/TREM2/NUPR1	6	GO	LAM1: Cluster1
GO:0048659	GO:smooth muscle cell proliferation	6/189	171/18670	0.00798321	0.0487746	0.0359805	AIF1/AKR1B1/COMT/CYBA/PPARG/HMOX1	6	GO	LAM1: Cluster1
GO:0034101	GO:erythrocyte homeostasis	5/189	122/18670	0.00805702	0.0490401	0.0361763	SPI1/HMOX1/G6PD/INHBA/DNASE2	5	GO	LAM1: Cluster1
GO:1903409	GO:reactive oxygen species biosynthetic process	5/189	122/18670	0.00805702	0.0490401	0.0361763	GCHFR/ACP5/TSPO/AIF1/CYBA	5	GO	LAM1: Cluster1
GO:0001910	GO:regulation of leukocyte mediated cytotoxicity	4/189	78/18670	0.00810598	0.0492454	0.0363278	TYROBP/HLA-B/LGALS9/LAMP1	4	GO	LAM1: Cluster1
GO:0009145	GO:purine nucleoside triphosphate biosynthetic process	6/189	172/18670	0.00820406	0.0494824	0.0365026	FBP1/TMSB4X/GPD1/ALDOA/TREM2/NUPR1	6	GO	LAM1: Cluster1
GO:0010955	GO:negative regulation of protein processing	3/189	41/18670	0.00820624	0.0494824	0.0365026	VSIG4/SERPING1/CTSZ	3	GO	LAM1: Cluster1
GO:0050873	GO:brown fat cell differentiation	3/189	41/18670	0.00820624	0.0494824	0.0365026	FABP4/CEBPA/CEBPB	3	GO	LAM1: Cluster1
GO:1903318	GO:negative regulation of protein maturation	3/189	41/18670	0.00820624	0.0494824	0.0365026	VSIG4/SERPING1/CTSZ	3	GO	LAM1: Cluster1
GO:0042089	GO:cytokine biosynthetic process	5/189	123/18670	0.00833118	0.050049	0.0369206	TYROBP/CD74/HMOX1/CEBPB/INHBA	5	GO	LAM1: Cluster1
GO:0071621	GO:granulocyte chemotaxis	5/189	123/18670	0.00833118	0.050049	0.0369206	LGALS3/FCER1G/CD74/S100A9/CCL18	5	GO	LAM1: Cluster1
GO:0030193	GO:regulation of blood coagulation	4/189	79/18670	0.00847217	0.0506885	0.0373924	APOE/FCER1G/SERPING1/ANXA5	4	GO	LAM1: Cluster1
GO:0001894	GO:tissue homeostasis	7/189	227/18670	0.00849165	0.0506885	0.0373924	ACP5/LYZ/AKR1B1/TULP1/LIPA/SNX10/RBP4	7	GO	LAM1: Cluster1
GO:0006896	GO:Golgi to vacuole transport	2/189	14/18670	0.0085631	0.0506885	0.0373924	LAMP1/VTI1B	2	GO	LAM1: Cluster1
GO:0034370	GO:triglyceride-rich lipoprotein particle remodeling	2/189	14/18670	0.0085631	0.0506885	0.0373924	APOE/LPL	2	GO	LAM1: Cluster1
GO:0036295	GO:cellular response to increased oxygen levels	2/189	14/18670	0.0085631	0.0506885	0.0373924	PPARG/ATP6V0D1	2	GO	LAM1: Cluster1
GO:0046479	GO:glycosphingolipid catabolic process	2/189	14/18670	0.0085631	0.0506885	0.0373924	PSAP/HEXB	2	GO	LAM1: Cluster1
GO:0072567	GO:chemokine (C-X-C motif) ligand 2 production	2/189	14/18670	0.0085631	0.0506885	0.0373924	LPL/CD74	2	GO	LAM1: Cluster1
GO:2001279	GO:regulation of unsaturated fatty acid biosynthetic process	2/189	14/18670	0.0085631	0.0506885	0.0373924	CD74/FABP5	2	GO	LAM1: Cluster1
GO:0042107	GO:cytokine metabolic process	5/189	124/18670	0.00861175	0.0508833	0.0375361	TYROBP/CD74/HMOX1/CEBPB/INHBA	5	GO	LAM1: Cluster1
GO:0006654	GO:phosphatidic acid biosynthetic process	3/189	42/18670	0.00877264	0.0517394	0.0381676	ABHD5/GPD1/AGPAT2	3	GO	LAM1: Cluster1
GO:0022617	GO:extracellular matrix disassembly	4/189	80/18670	0.00884902	0.0519057	0.0382902	CST3/BSG/CTSS/CD44	4	GO	LAM1: Cluster1
GO:0140029	GO:exocytic process	4/189	80/18670	0.00884902	0.0519057	0.0382902	FCER1G/STXBP2/VAMP8/VTI1B	4	GO	LAM1: Cluster1
GO:1900046	GO:regulation of hemostasis	4/189	80/18670	0.00884902	0.0519057	0.0382902	APOE/FCER1G/SERPING1/ANXA5	4	GO	LAM1: Cluster1
GO:0010594	GO:regulation of endothelial cell migration	7/189	229/18670	0.00888727	0.0520356	0.0383861	GRN/APOE/TMSB4X/PPARG/GLUL/HMOX1/RGCC	7	GO	LAM1: Cluster1
GO:2001234	GO:negative regulation of apoptotic signaling pathway	7/189	230/18670	0.00909008	0.0531269	0.0391911	LGALS3/CD74/GPX1/GRINA/HMOX1/VDAC2/CD44	7	GO	LAM1: Cluster1
GO:0002793	GO:positive regulation of peptide secretion	8/189	288/18670	0.00919883	0.0534998	0.0394662	LPL/AIF1/PYCARD/GLUL/RGCC/RBP4/TREM2/LGALS9	8	GO	LAM1: Cluster1
GO:1903706	GO:regulation of hemopoiesis	11/189	475/18670	0.00921236	0.0534998	0.0394662	TYROBP/LGALS3/C1QC/CD74/SPI1/PSMA7/CEBPB/TREM2/INHBA/EVI2B/LGALS9	11	GO	LAM1: Cluster1
GO:0016126	GO:sterol biosynthetic process	4/189	81/18670	0.00923666	0.0534998	0.0394662	APOE/CES1/G6PD/SCD	4	GO	LAM1: Cluster1
GO:0033238	GO:regulation of cellular amine metabolic process	4/189	81/18670	0.00923666	0.0534998	0.0394662	COMT/OAZ1/PSMA7/SLC7A7	4	GO	LAM1: Cluster1
GO:0048708	GO:astrocyte differentiation	4/189	81/18670	0.00923666	0.0534998	0.0394662	C1QA/GRN/VIM/TREM2	4	GO	LAM1: Cluster1
GO:0046473	GO:phosphatidic acid metabolic process	3/189	43/18670	0.00936142	0.0541051	0.0399127	ABHD5/GPD1/AGPAT2	3	GO	LAM1: Cluster1
GO:0009201	GO:ribonucleoside triphosphate biosynthetic process	6/189	177/18670	0.00937465	0.0541051	0.0399127	FBP1/TMSB4X/GPD1/ALDOA/TREM2/NUPR1	6	GO	LAM1: Cluster1
GO:0032368	GO:regulation of lipid transport	5/189	127/18670	0.00949261	0.0546672	0.0403274	APOC1/APOE/TSPO/LAMTOR1/PPARG	5	GO	LAM1: Cluster1
GO:0042445	GO:hormone metabolic process	7/189	232/18670	0.00950587	0.0546672	0.0403274	TSPO/CES1/CYP27A1/AKR1B1/COMT/CTSZ/RBP4	7	GO	LAM1: Cluster1
GO:0032637	GO:interleukin-8 production	4/189	82/18670	0.0096352	0.0547886	0.0404169	CD74/PYCARD/TMSB4X/LGALS9	4	GO	LAM1: Cluster1
GO:0046209	GO:nitric oxide metabolic process	4/189	82/18670	0.0096352	0.0547886	0.0404169	GCHFR/ACP5/TSPO/AIF1	4	GO	LAM1: Cluster1
GO:0010631	GO:epithelial cell migration	9/189	351/18670	0.00967165	0.0547886	0.0404169	GRN/APOE/GPX1/TMSB4X/PPARG/GLUL/HMOX1/RGCC/GLIPR2	9	GO	LAM1: Cluster1
GO:0010632	GO:regulation of epithelial cell migration	8/189	291/18670	0.00975401	0.0547886	0.0404169	GRN/APOE/TMSB4X/PPARG/GLUL/HMOX1/RGCC/GLIPR2	8	GO	LAM1: Cluster1
GO:0015802	GO:basic amino acid transport	2/189	15/18670	0.00981515	0.0547886	0.0404169	SLC11A1/SLC7A7	2	GO	LAM1: Cluster1
GO:0030812	GO:negative regulation of nucleotide catabolic process	2/189	15/18670	0.00981515	0.0547886	0.0404169	FBP1/NUPR1	2	GO	LAM1: Cluster1
GO:0030852	GO:regulation of granulocyte differentiation	2/189	15/18670	0.00981515	0.0547886	0.0404169	C1QC/EVI2B	2	GO	LAM1: Cluster1
GO:0033008	GO:positive regulation of mast cell activation involved in immune response	2/189	15/18670	0.00981515	0.0547886	0.0404169	FCER1G/VAMP8	2	GO	LAM1: Cluster1
GO:0042159	GO:lipoprotein catabolic process	2/189	15/18670	0.00981515	0.0547886	0.0404169	CTSD/APOE	2	GO	LAM1: Cluster1
GO:0043306	GO:positive regulation of mast cell degranulation	2/189	15/18670	0.00981515	0.0547886	0.0404169	FCER1G/VAMP8	2	GO	LAM1: Cluster1
GO:0043518	GO:negative regulation of DNA damage response, signal transduction by p53 class mediator	2/189	15/18670	0.00981515	0.0547886	0.0404169	CD74/CD44	2	GO	LAM1: Cluster1
GO:0045073	GO:regulation of chemokine biosynthetic process	2/189	15/18670	0.00981515	0.0547886	0.0404169	CD74/HMOX1	2	GO	LAM1: Cluster1
GO:0045342	GO:MHC class II biosynthetic process	2/189	15/18670	0.00981515	0.0547886	0.0404169	SPI1/SLC11A1	2	GO	LAM1: Cluster1
GO:0045410	GO:positive regulation of interleukin-6 biosynthetic process	2/189	15/18670	0.00981515	0.0547886	0.0404169	TYROBP/CD74	2	GO	LAM1: Cluster1
GO:0051198	GO:negative regulation of coenzyme metabolic process	2/189	15/18670	0.00981515	0.0547886	0.0404169	FBP1/NUPR1	2	GO	LAM1: Cluster1
GO:0060099	GO:regulation of phagocytosis, engulfment	2/189	15/18670	0.00981515	0.0547886	0.0404169	PPARG/TREM2	2	GO	LAM1: Cluster1
GO:2000484	GO:positive regulation of interleukin-8 secretion	2/189	15/18670	0.00981515	0.0547886	0.0404169	PYCARD/LGALS9	2	GO	LAM1: Cluster1
GO:1902903	GO:regulation of supramolecular fiber organization	9/189	352/18670	0.00984126	0.0548396	0.0404545	APOE/PYCARD/CAPG/GPX1/TMSB4X/ARPC3/RGCC/TMSB10/ARPC1B	9	GO	LAM1: Cluster1
GO:0008064	GO:regulation of actin polymerization or depolymerization	6/189	179/18670	0.00987471	0.0549312	0.0405222	PYCARD/CAPG/TMSB4X/ARPC3/TMSB10/ARPC1B	6	GO	LAM1: Cluster1
GO:0032965	GO:regulation of collagen biosynthetic process	3/189	44/18670	0.00997276	0.0552864	0.0407842	PPARG/VIM/RGCC	3	GO	LAM1: Cluster1
GO:0090382	GO:phagosome maturation	3/189	44/18670	0.00997276	0.0552864	0.0407842	ATP6V0B/ATP6V1F/ATP6V0D1	3	GO	LAM1: Cluster1
GO:0046470	GO:phosphatidylcholine metabolic process	4/189	83/18670	0.0100448	0.0554005	0.0408683	APOC1/PLBD1/PLAAT3/FABP5	4	GO	LAM1: Cluster1
GO:0048145	GO:regulation of fibroblast proliferation	4/189	83/18670	0.0100448	0.0554005	0.0408683	FTH1/CD74/PPARG/NUPR1	4	GO	LAM1: Cluster1
GO:2000106	GO:regulation of leukocyte apoptotic process	4/189	83/18670	0.0100448	0.0554005	0.0408683	LGALS3/FCER1G/CD74/LGALS9	4	GO	LAM1: Cluster1
GO:0044106	GO:cellular amine metabolic process	5/189	129/18670	0.0101132	0.0555013	0.0409427	COMT/OAZ1/PSMA7/SLC7A7/HNMT	5	GO	LAM1: Cluster1
GO:0030832	GO:regulation of actin filament length	6/189	180/18670	0.0101317	0.0555013	0.0409427	PYCARD/CAPG/TMSB4X/ARPC3/TMSB10/ARPC1B	6	GO	LAM1: Cluster1
GO:0043534	GO:blood vessel endothelial cell migration	6/189	180/18670	0.0101317	0.0555013	0.0409427	APOE/GPX1/TMSB4X/PPARG/HMOX1/RGCC	6	GO	LAM1: Cluster1
GO:0070613	GO:regulation of protein processing	6/189	180/18670	0.0101317	0.0555013	0.0409427	C1QB/C1QA/VSIG4/C1QC/SERPING1/CTSZ	6	GO	LAM1: Cluster1
GO:0009161	GO:ribonucleoside monophosphate metabolic process	9/189	354/18670	0.0101872	0.0556167	0.0410278	FBP1/TSPO/TMSB4X/GPD1/ALDOA/NDUFS5/UPP1/TREM2/NUPR1	9	GO	LAM1: Cluster1
GO:0090132	GO:epithelium migration	9/189	354/18670	0.0101872	0.0556167	0.0410278	GRN/APOE/GPX1/TMSB4X/PPARG/GLUL/HMOX1/RGCC/GLIPR2	9	GO	LAM1: Cluster1
GO:0071216	GO:cellular response to biotic stimulus	7/189	236/18670	0.010379	0.0565518	0.0417176	CD68/TSPO/PYCARD/VIM/CEBPB/LY86/TREM2	7	GO	LAM1: Cluster1
GO:0002285	GO:lymphocyte activation involved in immune response	6/189	181/18670	0.0103935	0.0565518	0.0417176	LGALS3/FCER1G/HLA-DMB/SLC11A1/LGALS9/LAMP1	6	GO	LAM1: Cluster1
GO:0010507	GO:negative regulation of autophagy	4/189	84/18670	0.0104654	0.0565624	0.0417255	TSPO/HMOX1/TREM2/NUPR1	4	GO	LAM1: Cluster1
GO:0048144	GO:fibroblast proliferation	4/189	84/18670	0.0104654	0.0565624	0.0417255	FTH1/CD74/PPARG/NUPR1	4	GO	LAM1: Cluster1
GO:0050818	GO:regulation of coagulation	4/189	84/18670	0.0104654	0.0565624	0.0417255	APOE/FCER1G/SERPING1/ANXA5	4	GO	LAM1: Cluster1
GO:0050886	GO:endocrine process	4/189	84/18670	0.0104654	0.0565624	0.0417255	CES1/CYBA/CTSZ/INHBA	4	GO	LAM1: Cluster1
GO:0002833	GO:positive regulation of response to biotic stimulus	3/189	45/18670	0.0106068	0.0571354	0.0421481	GRN/CYBA/LY86	3	GO	LAM1: Cluster1
GO:0071827	GO:plasma lipoprotein particle organization	3/189	45/18670	0.0106068	0.0571354	0.0421481	APOC1/APOE/LPL	3	GO	LAM1: Cluster1
GO:0009166	GO:nucleotide catabolic process	6/189	182/18670	0.01066	0.0572312	0.0422188	FBP1/GPX1/GPD1/ALDOA/UPP1/NUPR1	6	GO	LAM1: Cluster1
GO:1903317	GO:regulation of protein maturation	6/189	182/18670	0.01066	0.0572312	0.0422188	C1QB/C1QA/VSIG4/C1QC/SERPING1/CTSZ	6	GO	LAM1: Cluster1
GO:0034308	GO:primary alcohol metabolic process	4/189	85/18670	0.0108974	0.0579171	0.0427248	ALDH2/AKR1B1/GPD1/RBP4	4	GO	LAM1: Cluster1
GO:2001057	GO:reactive nitrogen species metabolic process	4/189	85/18670	0.0108974	0.0579171	0.0427248	GCHFR/ACP5/TSPO/AIF1	4	GO	LAM1: Cluster1
GO:0009127	GO:purine nucleoside monophosphate biosynthetic process	6/189	183/18670	0.0109314	0.0579171	0.0427248	FBP1/TMSB4X/GPD1/ALDOA/TREM2/NUPR1	6	GO	LAM1: Cluster1
GO:0009168	GO:purine ribonucleoside monophosphate biosynthetic process	6/189	183/18670	0.0109314	0.0579171	0.0427248	FBP1/TMSB4X/GPD1/ALDOA/TREM2/NUPR1	6	GO	LAM1: Cluster1
GO:0033002	GO:muscle cell proliferation	7/189	239/18670	0.0110712	0.0579171	0.0427248	AIF1/AKR1B1/COMT/CYBA/PPARG/HMOX1/RBP4	7	GO	LAM1: Cluster1
GO:2000116	GO:regulation of cysteine-type endopeptidase activity	7/189	239/18670	0.0110712	0.0579171	0.0427248	CTSD/PYCARD/S100A9/GPX1/PPARG/LGALS9/CD44	7	GO	LAM1: Cluster1
GO:0043280	GO:positive regulation of cysteine-type endopeptidase activity involved in apoptotic process	5/189	132/18670	0.0110953	0.0579171	0.0427248	CTSD/PYCARD/S100A9/PPARG/LGALS9	5	GO	LAM1: Cluster1
GO:0072329	GO:monocarboxylic acid catabolic process	5/189	132/18670	0.0110953	0.0579171	0.0427248	ECHDC1/PGD/DECR1/HADH/PHYH	5	GO	LAM1: Cluster1
GO:0006103	GO:2-oxoglutarate metabolic process	2/189	16/18670	0.0111432	0.0579171	0.0427248	PHYH/IDH1	2	GO	LAM1: Cluster1
GO:0006957	GO:complement activation, alternative pathway	2/189	16/18670	0.0111432	0.0579171	0.0427248	VSIG4/CFD	2	GO	LAM1: Cluster1
GO:0030214	GO:hyaluronan catabolic process	2/189	16/18670	0.0111432	0.0579171	0.0427248	HEXB/CD44	2	GO	LAM1: Cluster1
GO:0030889	GO:negative regulation of B cell proliferation	2/189	16/18670	0.0111432	0.0579171	0.0427248	TYROBP/MNDA	2	GO	LAM1: Cluster1
GO:0042033	GO:chemokine biosynthetic process	2/189	16/18670	0.0111432	0.0579171	0.0427248	CD74/HMOX1	2	GO	LAM1: Cluster1
GO:0043031	GO:negative regulation of macrophage activation	2/189	16/18670	0.0111432	0.0579171	0.0427248	VSIG4/GRN	2	GO	LAM1: Cluster1
GO:0050755	GO:chemokine metabolic process	2/189	16/18670	0.0111432	0.0579171	0.0427248	CD74/HMOX1	2	GO	LAM1: Cluster1
GO:0097067	GO:cellular response to thyroid hormone stimulus	2/189	16/18670	0.0111432	0.0579171	0.0427248	CTSB/CTSS	2	GO	LAM1: Cluster1
GO:1902166	GO:negative regulation of intrinsic apoptotic signaling pathway in response to DNA damage by p53 class mediator	2/189	16/18670	0.0111432	0.0579171	0.0427248	CD74/CD44	2	GO	LAM1: Cluster1
GO:1905153	GO:regulation of membrane invagination	2/189	16/18670	0.0111432	0.0579171	0.0427248	PPARG/TREM2	2	GO	LAM1: Cluster1
GO:2001170	GO:negative regulation of ATP biosynthetic process	2/189	16/18670	0.0111432	0.0579171	0.0427248	FBP1/NUPR1	2	GO	LAM1: Cluster1
GO:0002758	GO:innate immune response-activating signal transduction	8/189	298/18670	0.0111462	0.0579171	0.0427248	MARCO/FCER1G/UBB/S100A9/CTSB/CYBA/CTSS/PSMA7	8	GO	LAM1: Cluster1
GO:0009896	GO:positive regulation of catabolic process	10/189	423/18670	0.0111833	0.0579614	0.0427575	APOE/CTSC/ABHD5/OAZ1/GPD1/HMOX1/CEBPA/TREM2/NUPR1/DAB2	10	GO	LAM1: Cluster1
GO:0002437	GO:inflammatory response to antigenic stimulus	3/189	46/18670	0.0112637	0.0579614	0.0427575	CD68/FCER1G/GPX1	3	GO	LAM1: Cluster1
GO:0030810	GO:positive regulation of nucleotide biosynthetic process	3/189	46/18670	0.0112637	0.0579614	0.0427575	TMSB4X/GPD1/TREM2	3	GO	LAM1: Cluster1
GO:0043277	GO:apoptotic cell clearance	3/189	46/18670	0.0112637	0.0579614	0.0427575	MARCO/TYROBP/TREM2	3	GO	LAM1: Cluster1
GO:0050706	GO:regulation of interleukin-1 beta secretion	3/189	46/18670	0.0112637	0.0579614	0.0427575	LPL/PYCARD/LGALS9	3	GO	LAM1: Cluster1
GO:1900373	GO:positive regulation of purine nucleotide biosynthetic process	3/189	46/18670	0.0112637	0.0579614	0.0427575	TMSB4X/GPD1/TREM2	3	GO	LAM1: Cluster1
GO:0090130	GO:tissue migration	9/189	360/18670	0.0112802	0.0579614	0.0427575	GRN/APOE/GPX1/TMSB4X/PPARG/GLUL/HMOX1/RGCC/GLIPR2	9	GO	LAM1: Cluster1
GO:0008625	GO:extrinsic apoptotic signaling pathway via death domain receptors	4/189	86/18670	0.0113406	0.0581793	0.0429182	LGALS3/GPX1/HMOX1/GABARAP	4	GO	LAM1: Cluster1
GO:0031331	GO:positive regulation of cellular catabolic process	9/189	361/18670	0.0114706	0.0587522	0.0433409	APOE/CTSC/ABHD5/GPD1/HMOX1/CEBPA/TREM2/NUPR1/DAB2	9	GO	LAM1: Cluster1
GO:1903708	GO:positive regulation of hemopoiesis	6/189	185/18670	0.0114887	0.0587522	0.0433409	TYROBP/CD74/TREM2/INHBA/EVI2B/LGALS9	6	GO	LAM1: Cluster1
GO:0038093	GO:Fc receptor signaling pathway	7/189	241/18670	0.0115509	0.0589769	0.0435066	FCER1G/FCGR3A/PSMA7/ARPC3/FCGR1A/FCGR2A/ARPC1B	7	GO	LAM1: Cluster1
GO:0006164	GO:purine nucleotide biosynthetic process	8/189	300/18670	0.0115697	0.0589797	0.0435087	FBP1/TMSB4X/MPC1/GPD1/ALDOA/TREM2/NUPR1/SCD	8	GO	LAM1: Cluster1
GO:0002920	GO:regulation of humoral immune response	5/189	134/18670	0.0117851	0.0596081	0.0439723	C1QB/C1QA/VSIG4/C1QC/SERPING1	5	GO	LAM1: Cluster1
GO:0030260	GO:entry into host cell	5/189	134/18670	0.0117851	0.0596081	0.0439723	CD74/CTSB/VAMP8/LGALS9/LAMP1	5	GO	LAM1: Cluster1
GO:0044409	GO:entry into host	5/189	134/18670	0.0117851	0.0596081	0.0439723	CD74/CTSB/VAMP8/LGALS9/LAMP1	5	GO	LAM1: Cluster1
GO:0051806	GO:entry into cell of other organism involved in symbiotic interaction	5/189	134/18670	0.0117851	0.0596081	0.0439723	CD74/CTSB/VAMP8/LGALS9/LAMP1	5	GO	LAM1: Cluster1
GO:0051828	GO:entry into other organism involved in symbiotic interaction	5/189	134/18670	0.0117851	0.0596081	0.0439723	CD74/CTSB/VAMP8/LGALS9/LAMP1	5	GO	LAM1: Cluster1
GO:0045861	GO:negative regulation of proteolysis	9/189	363/18670	0.0118587	0.0598863	0.0441775	VSIG4/SERPING1/CSTA/SERPINA1/CST3/GPX1/CSTB/CTSZ/CD44	9	GO	LAM1: Cluster1
GO:0006953	GO:acute-phase response	3/189	47/18670	0.0119437	0.0602214	0.0444246	HP/SERPINA1/CEBPB	3	GO	LAM1: Cluster1
GO:0034599	GO:cellular response to oxidative stress	8/189	302/18670	0.0120049	0.0604359	0.0445829	AIF1/GPX1/NCF2/PSAP/CYBA/HMOX1/TXN/G6PD	8	GO	LAM1: Cluster1
GO:0050921	GO:positive regulation of chemotaxis	5/189	135/18670	0.0121408	0.0610248	0.0450173	CD74/AIF1/TMSB4X/TREM2/LGALS9	5	GO	LAM1: Cluster1
GO:0032102	GO:negative regulation of response to external stimulus	9/189	365/18670	0.0122565	0.0615106	0.0453757	GRN/ACP5/APOE/AIF1/SERPING1/PYCARD/GPX1/ANXA5/PPARG	9	GO	LAM1: Cluster1
GO:0009142	GO:nucleoside triphosphate biosynthetic process	6/189	188/18670	0.0123619	0.0618476	0.0456243	FBP1/TMSB4X/GPD1/ALDOA/TREM2/NUPR1	6	GO	LAM1: Cluster1
GO:1901292	GO:nucleoside phosphate catabolic process	6/189	188/18670	0.0123619	0.0618476	0.0456243	FBP1/GPX1/GPD1/ALDOA/UPP1/NUPR1	6	GO	LAM1: Cluster1
GO:0010744	GO:positive regulation of macrophage derived foam cell differentiation	2/189	17/18670	0.0125456	0.0622846	0.0459467	LPL/MSR1	2	GO	LAM1: Cluster1
GO:0018904	GO:ether metabolic process	2/189	17/18670	0.0125456	0.0622846	0.0459467	PLAAT3/TXN	2	GO	LAM1: Cluster1
GO:0036149	GO:phosphatidylinositol acyl-chain remodeling	2/189	17/18670	0.0125456	0.0622846	0.0459467	PLBD1/PLAAT3	2	GO	LAM1: Cluster1
GO:0060850	GO:regulation of transcription involved in cell fate commitment	2/189	17/18670	0.0125456	0.0622846	0.0459467	PPARG/CEBPB	2	GO	LAM1: Cluster1
GO:0072673	GO:lamellipodium morphogenesis	2/189	17/18670	0.0125456	0.0622846	0.0459467	SNX2/CD44	2	GO	LAM1: Cluster1
GO:0009311	GO:oligosaccharide metabolic process	3/189	48/18670	0.0126467	0.0626904	0.046246	FBP1/GAA/HEXB	3	GO	LAM1: Cluster1
GO:0046034	GO:ATP metabolic process	8/189	305/18670	0.0126802	0.0627604	0.0462977	FBP1/TSPO/TMSB4X/GPD1/ALDOA/NDUFS5/TREM2/NUPR1	8	GO	LAM1: Cluster1
GO:0006094	GO:gluconeogenesis	4/189	89/18670	0.0127396	0.0629576	0.0464431	FBP1/GPD1/ALDOA/RBP4	4	GO	LAM1: Cluster1
GO:0050673	GO:epithelial cell proliferation	10/189	434/18670	0.0131925	0.0650963	0.0480208	GRN/APOE/GPX1/CYBA/PPARG/GLUL/HMOX1/RGCC/CEBPB/NUPR1	10	GO	LAM1: Cluster1
GO:0009308	GO:amine metabolic process	5/189	138/18670	0.0132511	0.0652861	0.0481608	COMT/OAZ1/PSMA7/SLC7A7/HNMT	5	GO	LAM1: Cluster1
GO:0003044	GO:regulation of systemic arterial blood pressure mediated by a chemical signal	3/189	49/18670	0.013373	0.0654871	0.0483091	CES1/CYBA/CTSZ	3	GO	LAM1: Cluster1
GO:0008347	GO:glial cell migration	3/189	49/18670	0.013373	0.0654871	0.0483091	TSPO/HEXB/TREM2	3	GO	LAM1: Cluster1
GO:0032757	GO:positive regulation of interleukin-8 production	3/189	49/18670	0.013373	0.0654871	0.0483091	CD74/PYCARD/LGALS9	3	GO	LAM1: Cluster1
GO:0071825	GO:protein-lipid complex subunit organization	3/189	49/18670	0.013373	0.0654871	0.0483091	APOC1/APOE/LPL	3	GO	LAM1: Cluster1
GO:0002433	GO:immune response-regulating cell surface receptor signaling pathway involved in phagocytosis	5/189	139/18670	0.013636	0.0663728	0.0489625	FCGR3A/ARPC3/FCGR1A/FCGR2A/ARPC1B	5	GO	LAM1: Cluster1
GO:0006720	GO:isoprenoid metabolic process	5/189	139/18670	0.013636	0.0663728	0.0489625	APOE/LPL/AKR1B1/RBP4/PHYH	5	GO	LAM1: Cluster1
GO:0038096	GO:Fc-gamma receptor signaling pathway involved in phagocytosis	5/189	139/18670	0.013636	0.0663728	0.0489625	FCGR3A/ARPC3/FCGR1A/FCGR2A/ARPC1B	5	GO	LAM1: Cluster1
GO:0050715	GO:positive regulation of cytokine secretion	5/189	139/18670	0.013636	0.0663728	0.0489625	LPL/AIF1/PYCARD/RGCC/LGALS9	5	GO	LAM1: Cluster1
GO:0010951	GO:negative regulation of endopeptidase activity	7/189	250/18670	0.0138974	0.0672326	0.0495967	SERPING1/CSTA/SERPINA1/CST3/GPX1/CSTB/CD44	7	GO	LAM1: Cluster1
GO:0051224	GO:negative regulation of protein transport	6/189	193/18670	0.0139193	0.0672326	0.0495967	APOE/ANXA5/TMSB4X/RGCC/HADH/TXN	6	GO	LAM1: Cluster1
GO:0051098	GO:regulation of binding	9/189	373/18670	0.0139479	0.0672326	0.0495967	LGALS3/APOE/LRPAP1/TMSB4X/PPARG/HMOX1/CTSZ/TXN/DAB2	9	GO	LAM1: Cluster1
GO:0010713	GO:negative regulation of collagen metabolic process	2/189	18/18670	0.0140207	0.0672326	0.0495967	CST3/PPARG	2	GO	LAM1: Cluster1
GO:0030809	GO:negative regulation of nucleotide biosynthetic process	2/189	18/18670	0.0140207	0.0672326	0.0495967	FBP1/NUPR1	2	GO	LAM1: Cluster1
GO:0045056	GO:transcytosis	2/189	18/18670	0.0140207	0.0672326	0.0495967	FCGRT/LRPAP1	2	GO	LAM1: Cluster1
GO:0048268	GO:clathrin coat assembly	2/189	18/18670	0.0140207	0.0672326	0.0495967	CLTA/AP2S1	2	GO	LAM1: Cluster1
GO:1900372	GO:negative regulation of purine nucleotide biosynthetic process	2/189	18/18670	0.0140207	0.0672326	0.0495967	FBP1/NUPR1	2	GO	LAM1: Cluster1
GO:1902165	GO:regulation of intrinsic apoptotic signaling pathway in response to DNA damage by p53 class mediator	2/189	18/18670	0.0140207	0.0672326	0.0495967	CD74/CD44	2	GO	LAM1: Cluster1
GO:1903019	GO:negative regulation of glycoprotein metabolic process	2/189	18/18670	0.0140207	0.0672326	0.0495967	CST3/ITM2B	2	GO	LAM1: Cluster1
GO:0001961	GO:positive regulation of cytokine-mediated signaling pathway	3/189	50/18670	0.0141226	0.0675212	0.0498096	CD74/TREM2/AGPAT2	3	GO	LAM1: Cluster1
GO:0010718	GO:positive regulation of epithelial to mesenchymal transition	3/189	50/18670	0.0141226	0.0675212	0.0498096	RGCC/GLIPR2/DAB2	3	GO	LAM1: Cluster1
GO:0009123	GO:nucleoside monophosphate metabolic process	9/189	375/18670	0.0143965	0.0686773	0.0506625	FBP1/TSPO/TMSB4X/GPD1/ALDOA/NDUFS5/UPP1/TREM2/NUPR1	9	GO	LAM1: Cluster1
GO:0050709	GO:negative regulation of protein secretion	5/189	141/18670	0.0144282	0.0686773	0.0506625	APOE/ANXA5/TMSB4X/RGCC/HADH	5	GO	LAM1: Cluster1
GO:0097530	GO:granulocyte migration	5/189	141/18670	0.0144282	0.0686773	0.0506625	LGALS3/FCER1G/CD74/S100A9/CCL18	5	GO	LAM1: Cluster1
GO:0072522	GO:purine-containing compound biosynthetic process	8/189	313/18670	0.0146174	0.0694756	0.0512514	FBP1/TMSB4X/MPC1/GPD1/ALDOA/TREM2/NUPR1/SCD	8	GO	LAM1: Cluster1
GO:0007034	GO:vacuolar transport	5/189	142/18670	0.0148356	0.0704094	0.0519402	GRN/PSAP/ATP6V0D1/LAMP1/VTI1B	5	GO	LAM1: Cluster1
GO:0050678	GO:regulation of epithelial cell proliferation	9/189	378/18670	0.0150894	0.0715089	0.0527514	GRN/APOE/GPX1/CYBA/PPARG/GLUL/HMOX1/RGCC/NUPR1	9	GO	LAM1: Cluster1
GO:0002221	GO:pattern recognition receptor signaling pathway	6/189	197/18670	0.0152602	0.0721066	0.0531923	MARCO/UBB/S100A9/CTSB/CYBA/CTSS	6	GO	LAM1: Cluster1
GO:1904950	GO:negative regulation of establishment of protein localization	6/189	197/18670	0.0152602	0.0721066	0.0531923	APOE/ANXA5/TMSB4X/RGCC/HADH/TXN	6	GO	LAM1: Cluster1
GO:0051289	GO:protein homotetramerization	4/189	94/18670	0.0153072	0.0722234	0.0532784	FBP1/ALDOA/DECR1/APIP	4	GO	LAM1: Cluster1
GO:0001991	GO:regulation of systemic arterial blood pressure by circulatory renin-angiotensin	2/189	19/18670	0.0155669	0.0727053	0.0536339	CES1/CTSZ	2	GO	LAM1: Cluster1
GO:0010888	GO:negative regulation of lipid storage	2/189	19/18670	0.0155669	0.0727053	0.0536339	ABHD5/PPARG	2	GO	LAM1: Cluster1
GO:0010985	GO:negative regulation of lipoprotein particle clearance	2/189	19/18670	0.0155669	0.0727053	0.0536339	APOC1/LRPAP1	2	GO	LAM1: Cluster1
GO:0032930	GO:positive regulation of superoxide anion generation	2/189	19/18670	0.0155669	0.0727053	0.0536339	TYROBP/CYBA	2	GO	LAM1: Cluster1
GO:0061081	GO:positive regulation of myeloid leukocyte cytokine production involved in immune response	2/189	19/18670	0.0155669	0.0727053	0.0536339	FCER1G/CD74	2	GO	LAM1: Cluster1
GO:0071243	GO:cellular response to arsenic-containing substance	2/189	19/18670	0.0155669	0.0727053	0.0536339	GSTO1/HMOX1	2	GO	LAM1: Cluster1
GO:2000010	GO:positive regulation of protein localization to cell surface	2/189	19/18670	0.0155669	0.0727053	0.0536339	TYROBP/FCER1G	2	GO	LAM1: Cluster1
GO:0031099	GO:regeneration	6/189	198/18670	0.0156089	0.0727967	0.0537013	GRN/TSPO/GPX1/PPARG/HMOX1/CEBPB	6	GO	LAM1: Cluster1
GO:1902107	GO:positive regulation of leukocyte differentiation	5/189	144/18670	0.0156735	0.0729746	0.0538326	TYROBP/CD74/TREM2/EVI2B/LGALS9	5	GO	LAM1: Cluster1
GO:0050885	GO:neuromuscular process controlling balance	3/189	52/18670	0.0156923	0.0729746	0.0538326	PSAP/GAA/HEXB	3	GO	LAM1: Cluster1
GO:0050810	GO:regulation of steroid biosynthetic process	4/189	95/18670	0.015857	0.0736349	0.0543196	APOE/TSPO/SCD/ASAH1	4	GO	LAM1: Cluster1
GO:0006650	GO:glycerophospholipid metabolic process	8/189	319/18670	0.0162056	0.0751458	0.0554342	APOC1/ABHD5/PTPMT1/PLBD1/PLAAT3/GPD1/FABP5/AGPAT2	8	GO	LAM1: Cluster1
GO:0019217	GO:regulation of fatty acid metabolic process	4/189	96/18670	0.0164191	0.0755159	0.0557072	APOC1/CD74/PPARG/FABP5	4	GO	LAM1: Cluster1
GO:0042632	GO:cholesterol homeostasis	4/189	96/18670	0.0164191	0.0755159	0.0557072	FABP4/APOE/LPL/LAMTOR1	4	GO	LAM1: Cluster1
GO:0030195	GO:negative regulation of blood coagulation	3/189	53/18670	0.0165124	0.0755159	0.0557072	APOE/SERPING1/ANXA5	3	GO	LAM1: Cluster1
GO:0032964	GO:collagen biosynthetic process	3/189	53/18670	0.0165124	0.0755159	0.0557072	PPARG/VIM/RGCC	3	GO	LAM1: Cluster1
GO:0050702	GO:interleukin-1 beta secretion	3/189	53/18670	0.0165124	0.0755159	0.0557072	LPL/PYCARD/LGALS9	3	GO	LAM1: Cluster1
GO:0050704	GO:regulation of interleukin-1 secretion	3/189	53/18670	0.0165124	0.0755159	0.0557072	LPL/PYCARD/LGALS9	3	GO	LAM1: Cluster1
GO:0070228	GO:regulation of lymphocyte apoptotic process	3/189	53/18670	0.0165124	0.0755159	0.0557072	LGALS3/CD74/LGALS9	3	GO	LAM1: Cluster1
GO:1903307	GO:positive regulation of regulated secretory pathway	3/189	53/18670	0.0165124	0.0755159	0.0557072	FCER1G/VAMP8/LAMP1	3	GO	LAM1: Cluster1
GO:0002224	GO:toll-like receptor signaling pathway	5/189	146/18670	0.0165425	0.0755159	0.0557072	UBB/S100A9/CTSB/CYBA/CTSS	5	GO	LAM1: Cluster1
GO:0042542	GO:response to hydrogen peroxide	5/189	146/18670	0.0165425	0.0755159	0.0557072	HP/GPX1/PSAP/HMOX1/TXN	5	GO	LAM1: Cluster1
GO:0045834	GO:positive regulation of lipid metabolic process	5/189	146/18670	0.0165425	0.0755159	0.0557072	APOC1/APOE/CD74/ABHD5/PPARG	5	GO	LAM1: Cluster1
GO:0072659	GO:protein localization to plasma membrane	7/189	260/18670	0.0168852	0.0769717	0.0567812	LGALS3/FCER1G/BSG/TREM2/VAMP8/DAB2/VTI1B	7	GO	LAM1: Cluster1
GO:0015908	GO:fatty acid transport	4/189	97/18670	0.0169934	0.0771388	0.0569044	FABP4/APOE/PPARG/PLIN2	4	GO	LAM1: Cluster1
GO:0055092	GO:sterol homeostasis	4/189	97/18670	0.0169934	0.0771388	0.0569044	FABP4/APOE/LPL/LAMTOR1	4	GO	LAM1: Cluster1
GO:1902882	GO:regulation of response to oxidative stress	4/189	97/18670	0.0169934	0.0771388	0.0569044	GPX1/PSAP/TXN/MACROH2A1	4	GO	LAM1: Cluster1
GO:0016137	GO:glycoside metabolic process	2/189	20/18670	0.0171826	0.077238	0.0569776	AKR1B1/FUCA1	2	GO	LAM1: Cluster1
GO:0032816	GO:positive regulation of natural killer cell activation	2/189	20/18670	0.0171826	0.077238	0.0569776	TYROBP/LAMP1	2	GO	LAM1: Cluster1
GO:0033005	GO:positive regulation of mast cell activation	2/189	20/18670	0.0171826	0.077238	0.0569776	FCER1G/VAMP8	2	GO	LAM1: Cluster1
GO:0033194	GO:response to hydroperoxide	2/189	20/18670	0.0171826	0.077238	0.0569776	AIF1/GPX1	2	GO	LAM1: Cluster1
GO:0045019	GO:negative regulation of nitric oxide biosynthetic process	2/189	20/18670	0.0171826	0.077238	0.0569776	ACP5/TSPO	2	GO	LAM1: Cluster1
GO:1900424	GO:regulation of defense response to bacterium	2/189	20/18670	0.0171826	0.077238	0.0569776	GRN/CYBA	2	GO	LAM1: Cluster1
GO:1904406	GO:negative regulation of nitric oxide metabolic process	2/189	20/18670	0.0171826	0.077238	0.0569776	ACP5/TSPO	2	GO	LAM1: Cluster1
GO:0110053	GO:regulation of actin filament organization	7/189	261/18670	0.0172071	0.0772407	0.0569796	PYCARD/CAPG/TMSB4X/ARPC3/RGCC/TMSB10/ARPC1B	7	GO	LAM1: Cluster1
GO:0046164	GO:alcohol catabolic process	3/189	54/18670	0.0173562	0.0775869	0.057235	ALDH2/APOE/CYP27A1	3	GO	LAM1: Cluster1
GO:0050994	GO:regulation of lipid catabolic process	3/189	54/18670	0.0173562	0.0775869	0.057235	APOC1/ABHD5/IDH1	3	GO	LAM1: Cluster1
GO:1900047	GO:negative regulation of hemostasis	3/189	54/18670	0.0173562	0.0775869	0.057235	APOE/SERPING1/ANXA5	3	GO	LAM1: Cluster1
GO:0010466	GO:negative regulation of peptidase activity	7/189	262/18670	0.0175333	0.0782702	0.0577391	SERPING1/CSTA/SERPINA1/CST3/GPX1/CSTB/CD44	7	GO	LAM1: Cluster1
GO:0031341	GO:regulation of cell killing	4/189	98/18670	0.0175803	0.0783716	0.0578139	TYROBP/HLA-B/LGALS9/LAMP1	4	GO	LAM1: Cluster1
GO:0034764	GO:positive regulation of transmembrane transport	6/189	204/18670	0.0178181	0.0792133	0.0584347	GLRX/TMSB4X/GSTO1/CTSS/TREM2/G6PD	6	GO	LAM1: Cluster1
GO:1902905	GO:positive regulation of supramolecular fiber organization	6/189	204/18670	0.0178181	0.0792133	0.0584347	APOE/PYCARD/GPX1/ARPC3/RGCC/ARPC1B	6	GO	LAM1: Cluster1
GO:2001056	GO:positive regulation of cysteine-type endopeptidase activity	5/189	149/18670	0.017905	0.0794905	0.0586393	CTSD/PYCARD/S100A9/PPARG/LGALS9	5	GO	LAM1: Cluster1
GO:0071222	GO:cellular response to lipopolysaccharide	6/189	205/18670	0.0182061	0.0805734	0.0594381	CD68/TSPO/PYCARD/VIM/CEBPB/LY86	6	GO	LAM1: Cluster1
GO:0051188	GO:cofactor biosynthetic process	8/189	326/18670	0.0182123	0.0805734	0.0594381	FBP1/TSPO/MPC1/CYBA/GPD1/ALDOA/NUPR1/SCD	8	GO	LAM1: Cluster1
GO:0042304	GO:regulation of fatty acid biosynthetic process	3/189	55/18670	0.0182237	0.0805734	0.0594381	APOC1/CD74/FABP5	3	GO	LAM1: Cluster1
GO:0002455	GO:humoral immune response mediated by circulating immunoglobulin	5/189	150/18670	0.0183752	0.0811321	0.0598503	C1QB/C1QA/C1QC/SERPING1/HLA-DQB1	5	GO	LAM1: Cluster1
GO:0046677	GO:response to antibiotic	8/189	327/18670	0.0185129	0.0816287	0.0602166	HP/SPI1/GPX1/PSAP/HMOX1/RBP4/TXN/G6PD	8	GO	LAM1: Cluster1
GO:0035357	GO:peroxisome proliferator activated receptor signaling pathway	2/189	21/18670	0.0188663	0.0827353	0.0610329	PPARG/FABP5	2	GO	LAM1: Cluster1
GO:0042135	GO:neurotransmitter catabolic process	2/189	21/18670	0.0188663	0.0827353	0.0610329	COMT/HNMT	2	GO	LAM1: Cluster1
GO:0046716	GO:muscle cell cellular homeostasis	2/189	21/18670	0.0188663	0.0827353	0.0610329	ALDOA/GAA	2	GO	LAM1: Cluster1
GO:1904469	GO:positive regulation of tumor necrosis factor secretion	2/189	21/18670	0.0188663	0.0827353	0.0610329	LPL/LGALS9	2	GO	LAM1: Cluster1
GO:0001912	GO:positive regulation of leukocyte mediated cytotoxicity	3/189	56/18670	0.019115	0.083599	0.0616701	TYROBP/HLA-B/LAMP1	3	GO	LAM1: Cluster1
GO:1903202	GO:negative regulation of oxidative stress-induced cell death	3/189	56/18670	0.019115	0.083599	0.0616701	GPX1/PSAP/TXN	3	GO	LAM1: Cluster1
GO:0072331	GO:signal transduction by p53 class mediator	7/189	267/18670	0.0192301	0.0839887	0.0619576	CD74/UBB/PYCARD/PHLDA3/RGCC/NUPR1/CD44	7	GO	LAM1: Cluster1
GO:0001890	GO:placenta development	5/189	152/18670	0.0193399	0.0843543	0.0622272	CTSB/PPARG/BSG/CEBPA/CEBPB	5	GO	LAM1: Cluster1
GO:0048661	GO:positive regulation of smooth muscle cell proliferation	4/189	101/18670	0.019416	0.0844584	0.062304	AIF1/AKR1B1/CYBA/HMOX1	4	GO	LAM1: Cluster1
GO:1903426	GO:regulation of reactive oxygen species biosynthetic process	4/189	101/18670	0.019416	0.0844584	0.062304	ACP5/TSPO/AIF1/CYBA	4	GO	LAM1: Cluster1
GO:0033344	GO:cholesterol efflux	3/189	57/18670	0.02003	0.0864162	0.0637483	APOC1/APOE/LAMTOR1	3	GO	LAM1: Cluster1
GO:0042743	GO:hydrogen peroxide metabolic process	3/189	57/18670	0.02003	0.0864162	0.0637483	HP/GPX1/CYBA	3	GO	LAM1: Cluster1
GO:0050819	GO:negative regulation of coagulation	3/189	57/18670	0.02003	0.0864162	0.0637483	APOE/SERPING1/ANXA5	3	GO	LAM1: Cluster1
GO:0060760	GO:positive regulation of response to cytokine stimulus	3/189	57/18670	0.02003	0.0864162	0.0637483	CD74/TREM2/AGPAT2	3	GO	LAM1: Cluster1
GO:1900408	GO:negative regulation of cellular response to oxidative stress	3/189	57/18670	0.02003	0.0864162	0.0637483	GPX1/PSAP/TXN	3	GO	LAM1: Cluster1
GO:0002367	GO:cytokine production involved in immune response	4/189	102/18670	0.0200533	0.0864162	0.0637483	FCER1G/CD74/SLC11A1/HMOX1	4	GO	LAM1: Cluster1
GO:2000379	GO:positive regulation of reactive oxygen species metabolic process	4/189	102/18670	0.0200533	0.0864162	0.0637483	TYROBP/TSPO/AIF1/CYBA	4	GO	LAM1: Cluster1
GO:0050707	GO:regulation of cytokine secretion	6/189	210/18670	0.0202331	0.0870753	0.0642345	LPL/AIF1/PYCARD/TMSB4X/RGCC/LGALS9	6	GO	LAM1: Cluster1
GO:0015849	GO:organic acid transport	8/189	333/18670	0.0203917	0.0875244	0.0645658	FABP4/APOE/MPC1/SLC11A1/PSAP/PPARG/SLC7A7/PLIN2	8	GO	LAM1: Cluster1
GO:0046942	GO:carboxylic acid transport	8/189	333/18670	0.0203917	0.0875244	0.0645658	FABP4/APOE/MPC1/SLC11A1/PSAP/PPARG/SLC7A7/PLIN2	8	GO	LAM1: Cluster1
GO:0051346	GO:negative regulation of hydrolase activity	10/189	466/18670	0.0205874	0.0876743	0.0646764	APOC1/LGALS3/GCHFR/SERPING1/CSTA/SERPINA1/CST3/GPX1/CSTB/CD44	10	GO	LAM1: Cluster1
GO:0010226	GO:response to lithium ion	2/189	22/18670	0.0206165	0.0876743	0.0646764	FABP4/CEBPA	2	GO	LAM1: Cluster1
GO:0010884	GO:positive regulation of lipid storage	2/189	22/18670	0.0206165	0.0876743	0.0646764	LPL/MSR1	2	GO	LAM1: Cluster1
GO:0019883	GO:antigen processing and presentation of endogenous antigen	2/189	22/18670	0.0206165	0.0876743	0.0646764	CD74/HLA-B	2	GO	LAM1: Cluster1
GO:0045649	GO:regulation of macrophage differentiation	2/189	22/18670	0.0206165	0.0876743	0.0646764	C1QC/INHBA	2	GO	LAM1: Cluster1
GO:1901685	GO:glutathione derivative metabolic process	2/189	22/18670	0.0206165	0.0876743	0.0646764	GSTO1/MGST3	2	GO	LAM1: Cluster1
GO:1901687	GO:glutathione derivative biosynthetic process	2/189	22/18670	0.0206165	0.0876743	0.0646764	GSTO1/MGST3	2	GO	LAM1: Cluster1
GO:1901617	GO:organic hydroxy compound biosynthetic process	7/189	271/18670	0.020668	0.087778	0.0647529	APOE/CES1/CYP27A1/AKR1B1/G6PD/SCD/ASAH1	7	GO	LAM1: Cluster1
GO:2001236	GO:regulation of extrinsic apoptotic signaling pathway	5/189	155/18670	0.0208484	0.0884277	0.0652321	LGALS3/PYCARD/GPX1/HMOX1/INHBA	5	GO	LAM1: Cluster1
GO:0007015	GO:actin filament organization	9/189	400/18670	0.0209441	0.0884743	0.0652665	AIF1/PYCARD/CAPG/TMSB4X/ALDOA/ARPC3/RGCC/TMSB10/ARPC1B	9	GO	LAM1: Cluster1
GO:0017001	GO:antibiotic catabolic process	3/189	58/18670	0.0209689	0.0884743	0.0652665	ALDH2/HP/GPX1	3	GO	LAM1: Cluster1
GO:0030837	GO:negative regulation of actin filament polymerization	3/189	58/18670	0.0209689	0.0884743	0.0652665	CAPG/TMSB4X/TMSB10	3	GO	LAM1: Cluster1
GO:1902041	GO:regulation of extrinsic apoptotic signaling pathway via death domain receptors	3/189	58/18670	0.0209689	0.0884743	0.0652665	LGALS3/GPX1/HMOX1	3	GO	LAM1: Cluster1
GO:0009205	GO:purine ribonucleoside triphosphate metabolic process	8/189	335/18670	0.0210471	0.0886885	0.0654245	FBP1/TSPO/TMSB4X/GPD1/ALDOA/NDUFS5/TREM2/NUPR1	8	GO	LAM1: Cluster1
GO:0001523	GO:retinoid metabolic process	4/189	104/18670	0.0213661	0.0895728	0.0660769	APOE/LPL/AKR1B1/RBP4	4	GO	LAM1: Cluster1
GO:0071887	GO:leukocyte apoptotic process	4/189	104/18670	0.0213661	0.0895728	0.0660769	LGALS3/FCER1G/CD74/LGALS9	4	GO	LAM1: Cluster1
GO:1901800	GO:positive regulation of proteasomal protein catabolic process	4/189	104/18670	0.0213661	0.0895728	0.0660769	CEBPA/TREM2/NUPR1/DAB2	4	GO	LAM1: Cluster1
GO:0043535	GO:regulation of blood vessel endothelial cell migration	5/189	156/18670	0.0213678	0.0895728	0.0660769	APOE/TMSB4X/PPARG/HMOX1/RGCC	5	GO	LAM1: Cluster1
GO:0097755	GO:positive regulation of blood vessel diameter	3/189	59/18670	0.0219315	0.091698	0.0676446	APOE/GPX1/HMOX1	3	GO	LAM1: Cluster1
GO:1902883	GO:negative regulation of response to oxidative stress	3/189	59/18670	0.0219315	0.091698	0.0676446	GPX1/PSAP/TXN	3	GO	LAM1: Cluster1
GO:0002821	GO:positive regulation of adaptive immune response	4/189	105/18670	0.0220418	0.0919215	0.0678095	FCER1G/PYCARD/SLC11A1/HLA-B	4	GO	LAM1: Cluster1
GO:0045185	GO:maintenance of protein location	4/189	105/18670	0.0220418	0.0919215	0.0678095	TSPO/TMSB4X/TXN/TMSB10	4	GO	LAM1: Cluster1
GO:0006297	GO:nucleotide-excision repair, DNA gap filling	2/189	23/18670	0.0224316	0.092829	0.0684789	UBB/POLD4	2	GO	LAM1: Cluster1
GO:1901032	GO:negative regulation of response to reactive oxygen species	2/189	23/18670	0.0224316	0.092829	0.0684789	PSAP/TXN	2	GO	LAM1: Cluster1
GO:1902254	GO:negative regulation of intrinsic apoptotic signaling pathway by p53 class mediator	2/189	23/18670	0.0224316	0.092829	0.0684789	CD74/CD44	2	GO	LAM1: Cluster1
GO:1903206	GO:negative regulation of hydrogen peroxide-induced cell death	2/189	23/18670	0.0224316	0.092829	0.0684789	PSAP/TXN	2	GO	LAM1: Cluster1
GO:2001039	GO:negative regulation of cellular response to drug	2/189	23/18670	0.0224316	0.092829	0.0684789	PSAP/TXN	2	GO	LAM1: Cluster1
GO:0016482	GO:cytosolic transport	5/189	158/18670	0.0224318	0.092829	0.0684789	CES1/SNX2/LAMP1/DAB2/VTI1B	5	GO	LAM1: Cluster1
GO:0042136	GO:neurotransmitter biosynthetic process	4/189	106/18670	0.0227305	0.0939087	0.0692754	GCHFR/ACP5/TSPO/AIF1	4	GO	LAM1: Cluster1
GO:0009167	GO:purine ribonucleoside monophosphate metabolic process	8/189	340/18670	0.0227508	0.0939087	0.0692754	FBP1/TSPO/TMSB4X/GPD1/ALDOA/NDUFS5/TREM2/NUPR1	8	GO	LAM1: Cluster1
GO:0033013	GO:tetrapyrrole metabolic process	3/189	60/18670	0.0229179	0.0944781	0.0696954	TSPO/BLVRA/HMOX1	3	GO	LAM1: Cluster1
GO:0009126	GO:purine nucleoside monophosphate metabolic process	8/189	341/18670	0.0231029	0.0949981	0.0700791	FBP1/TSPO/TMSB4X/GPD1/ALDOA/NDUFS5/TREM2/NUPR1	8	GO	LAM1: Cluster1
GO:0009199	GO:ribonucleoside triphosphate metabolic process	8/189	341/18670	0.0231029	0.0949981	0.0700791	FBP1/TSPO/TMSB4X/GPD1/ALDOA/NDUFS5/TREM2/NUPR1	8	GO	LAM1: Cluster1
GO:0017157	GO:regulation of exocytosis	6/189	217/18670	0.0233214	0.0957747	0.0706519	FCER1G/HMOX1/STXBP2/VAMP8/LGALS9/LAMP1	6	GO	LAM1: Cluster1
GO:0009144	GO:purine nucleoside triphosphate metabolic process	8/189	342/18670	0.0234588	0.0960949	0.0708881	FBP1/TSPO/TMSB4X/GPD1/ALDOA/NDUFS5/TREM2/NUPR1	8	GO	LAM1: Cluster1
GO:1904062	GO:regulation of cation transmembrane transport	8/189	342/18670	0.0234588	0.0960949	0.0708881	GLRX/TMSB4X/CYBA/GSTO1/CTSS/TREM2/G6PD/SLC31A2	8	GO	LAM1: Cluster1
GO:0001101	GO:response to acid chemical	8/189	343/18670	0.0238186	0.097278	0.0717609	LPL/AKR1B1/LAMTOR1/CYBA/PPARG/RBP4/CEBPB/SCD	8	GO	LAM1: Cluster1
GO:0006027	GO:glycosaminoglycan catabolic process	3/189	61/18670	0.0239282	0.097278	0.0717609	FUCA1/HEXB/CD44	3	GO	LAM1: Cluster1
GO:0030888	GO:regulation of B cell proliferation	3/189	61/18670	0.0239282	0.097278	0.0717609	TYROBP/CD74/MNDA	3	GO	LAM1: Cluster1
GO:0050701	GO:interleukin-1 secretion	3/189	61/18670	0.0239282	0.097278	0.0717609	LPL/PYCARD/LGALS9	3	GO	LAM1: Cluster1
GO:1905953	GO:negative regulation of lipid localization	3/189	61/18670	0.0239282	0.097278	0.0717609	APOC1/ABHD5/PPARG	3	GO	LAM1: Cluster1
GO:2001244	GO:positive regulation of intrinsic apoptotic signaling pathway	3/189	61/18670	0.0239282	0.097278	0.0717609	UBB/S100A9/NUPR1	3	GO	LAM1: Cluster1
GO:0009062	GO:fatty acid catabolic process	4/189	108/18670	0.0241469	0.0980436	0.0723257	ECHDC1/DECR1/HADH/PHYH	4	GO	LAM1: Cluster1
GO:0002861	GO:regulation of inflammatory response to antigenic stimulus	2/189	24/18670	0.0243102	0.0983363	0.0725416	FCER1G/GPX1	2	GO	LAM1: Cluster1
GO:0046697	GO:decidualization	2/189	24/18670	0.0243102	0.0983363	0.0725416	CTSB/BSG	2	GO	LAM1: Cluster1
GO:0071677	GO:positive regulation of mononuclear cell migration	2/189	24/18670	0.0243102	0.0983363	0.0725416	LGALS3/AIF1	2	GO	LAM1: Cluster1
GO:0015718	GO:monocarboxylic acid transport	5/189	162/18670	0.0246616	0.0996328	0.073498	FABP4/APOE/MPC1/PPARG/PLIN2	5	GO	LAM1: Cluster1
hsa04145	KEGG:Phagosome	25/128	152/8104	4.49226e-19	8.98452e-17	7.37677e-17	MARCO/HLA-DPA1/HLA-DRB5/HLA-DRB1/HLA-DMA/HLA-DPB1/HLA-DQA1/MSR1/HLA-DMB/HLA-DRA/OLR1/ATP6V0B/FCGR3A/COLEC12/HLA-DQB1/RAB5C/FCGR2A/FCGR1A/ATP6V1F/NCF2/ATP6V0D1/CYBA/LAMP1/TFRC/CTSL	25	KEGG	LAM1: Cluster2
hsa05150	KEGG:Staphylococcus aureus infection	16/128	96/8104	1.32411e-12	1.32411e-10	1.08716e-10	C1QB/C1QA/C1QC/HLA-DPA1/HLA-DRB5/HLA-DRB1/HLA-DMA/HLA-DPB1/HLA-DQA1/HLA-DMB/HLA-DRA/FCGR3A/HLA-DQB1/FCGR2A/FCGR1A/CFD	16	KEGG	LAM1: Cluster2
hsa05152	KEGG:Tuberculosis	20/128	180/8104	4.44266e-12	2.96177e-10	2.43177e-10	CTSD/HLA-DPA1/HLA-DRB5/FCER1G/HLA-DRB1/HLA-DMA/HLA-DPB1/CD74/HLA-DQA1/HLA-DMB/HLA-DRA/ATP6V0B/FCGR3A/HLA-DQB1/RAB5C/FCGR2A/FCGR1A/ATP6V0D1/CEBPB/LAMP1	20	KEGG	LAM1: Cluster2
hsa05140	KEGG:Leishmaniasis	14/128	77/8104	1.05981e-11	3.80829e-10	3.1268e-10	HLA-DPA1/HLA-DRB5/HLA-DRB1/HLA-DMA/HLA-DPB1/HLA-DQA1/HLA-DMB/HLA-DRA/FCGR3A/HLA-DQB1/FCGR2A/FCGR1A/NCF2/CYBA	14	KEGG	LAM1: Cluster2
hsa04142	KEGG:Lysosome	17/128	128/8104	1.13916e-11	3.80829e-10	3.1268e-10	CTSD/CD68/ACP5/CTSC/ATP6V0B/CTSZ/CTSB/SLC11A1/GAA/ATP6V0D1/HEXB/LAMP1/PSAP/LIPA/CTSL/CD63/DNASE2	17	KEGG	LAM1: Cluster2
hsa05323	KEGG:Rheumatoid arthritis	15/128	93/8104	1.14249e-11	3.80829e-10	3.1268e-10	HLA-DPA1/HLA-DRB5/HLA-DRB1/ACP5/HLA-DMA/HLA-DPB1/HLA-DQA1/HLA-DMB/HLA-DRA/ATP6V0B/HLA-DQB1/ATP6V1F/ATP6V0D1/CTSL/CXCL3	15	KEGG	LAM1: Cluster2
hsa05310	KEGG:Asthma	10/128	31/8104	2.27063e-11	6.48752e-10	5.3266e-10	HLA-DPA1/HLA-DRB5/FCER1G/HLA-DRB1/HLA-DMA/HLA-DPB1/HLA-DQA1/HLA-DMB/HLA-DRA/HLA-DQB1	10	KEGG	LAM1: Cluster2
hsa05322	KEGG:Systemic lupus erythematosus	16/128	136/8104	3.08191e-10	7.70478e-09	6.32603e-09	C1QB/C1QA/C1QC/HLA-DPA1/HLA-DRB5/HLA-DRB1/HLA-DMA/HLA-DPB1/HLA-DQA1/HLA-DMB/HLA-DRA/FCGR3A/HLA-DQB1/H2AZ1/FCGR2A/FCGR1A	16	KEGG	LAM1: Cluster2
hsa04612	KEGG:Antigen processing and presentation	12/128	78/8104	2.57215e-09	5.7159e-08	4.69305e-08	HLA-DPA1/HLA-DRB5/HLA-DRB1/HLA-DMA/HLA-DPB1/CD74/HLA-DQA1/HLA-DMB/HLA-DRA/HLA-DQB1/CTSB/CTSL	12	KEGG	LAM1: Cluster2
hsa05330	KEGG:Allograft rejection	9/128	38/8104	5.10647e-09	1.02129e-07	8.38536e-08	HLA-DPA1/HLA-DRB5/HLA-DRB1/HLA-DMA/HLA-DPB1/HLA-DQA1/HLA-DMB/HLA-DRA/HLA-DQB1	9	KEGG	LAM1: Cluster2
hsa05332	KEGG:Graft-versus-host disease	9/128	42/8104	1.32439e-08	2.40797e-07	1.97707e-07	HLA-DPA1/HLA-DRB5/HLA-DRB1/HLA-DMA/HLA-DPB1/HLA-DQA1/HLA-DMB/HLA-DRA/HLA-DQB1	9	KEGG	LAM1: Cluster2
hsa04940	KEGG:Type I diabetes mellitus	9/128	43/8104	1.65282e-08	2.7547e-07	2.26175e-07	HLA-DPA1/HLA-DRB5/HLA-DRB1/HLA-DMA/HLA-DPB1/HLA-DQA1/HLA-DMB/HLA-DRA/HLA-DQB1	9	KEGG	LAM1: Cluster2
hsa04672	KEGG:Intestinal immune network for IgA production	9/128	49/8104	5.55949e-08	8.55306e-07	7.02252e-07	HLA-DPA1/HLA-DRB5/HLA-DRB1/HLA-DMA/HLA-DPB1/HLA-DQA1/HLA-DMB/HLA-DRA/HLA-DQB1	9	KEGG	LAM1: Cluster2
hsa05320	KEGG:Autoimmune thyroid disease	9/128	53/8104	1.13708e-07	1.62441e-06	1.33372e-06	HLA-DPA1/HLA-DRB5/HLA-DRB1/HLA-DMA/HLA-DPB1/HLA-DQA1/HLA-DMB/HLA-DRA/HLA-DQB1	9	KEGG	LAM1: Cluster2
hsa05416	KEGG:Viral myocarditis	9/128	60/8104	3.45595e-07	4.60793e-06	3.78336e-06	HLA-DPA1/HLA-DRB5/HLA-DRB1/HLA-DMA/HLA-DPB1/HLA-DQA1/HLA-DMB/HLA-DRA/HLA-DQB1	9	KEGG	LAM1: Cluster2
hsa04640	KEGG:Hematopoietic cell lineage	11/128	99/8104	3.84598e-07	4.80747e-06	3.94719e-06	HLA-DPA1/HLA-DRB5/HLA-DRB1/HLA-DMA/HLA-DPB1/HLA-DQA1/HLA-DMB/HLA-DRA/HLA-DQB1/FCGR1A/TFRC	11	KEGG	LAM1: Cluster2
hsa05321	KEGG:Inflammatory bowel disease	9/128	65/8104	6.99242e-07	8.22638e-06	6.75429e-06	HLA-DPA1/HLA-DRB5/HLA-DRB1/HLA-DMA/HLA-DPB1/HLA-DQA1/HLA-DMB/HLA-DRA/HLA-DQB1	9	KEGG	LAM1: Cluster2
hsa04979	KEGG:Cholesterol metabolism	8/128	50/8104	9.57058e-07	1.0634e-05	8.73106e-06	APOC1/TSPO/LPL/APOE/CYP27A1/LRPAP1/LIPA/VDAC2	8	KEGG	LAM1: Cluster2
hsa04380	KEGG:Osteoclast differentiation	11/128	128/8104	5.0409e-06	5.30621e-05	4.35668e-05	TYROBP/ACP5/SPI1/FCGR3A/FCGR2A/TREM2/FCGR1A/NCF2/PPARG/CYBA/OSCAR	11	KEGG	LAM1: Cluster2
hsa00030	KEGG:Pentose phosphate pathway	6/128	30/8104	6.00684e-06	6.00684e-05	4.93193e-05	FBP1/TKT/TALDO1/G6PD/ALDOA/PGD	6	KEGG	LAM1: Cluster2
hsa05145	KEGG:Toxoplasmosis	10/128	112/8104	9.83777e-06	9.36931e-05	7.6927e-05	HLA-DPA1/HLA-DRB5/HLA-DRB1/HLA-DMA/HLA-DPB1/HLA-DQA1/HLA-DMB/HLA-DRA/HLA-DQB1/ALOX5	10	KEGG	LAM1: Cluster2
hsa04658	KEGG:Th1 and Th2 cell differentiation	9/128	92/8104	1.3275e-05	0.000120682	9.90864e-05	HLA-DPA1/HLA-DRB5/HLA-DRB1/HLA-DMA/HLA-DPB1/HLA-DQA1/HLA-DMB/HLA-DRA/HLA-DQB1	9	KEGG	LAM1: Cluster2
hsa04216	KEGG:Ferroptosis	6/128	41/8104	3.94562e-05	0.000343098	0.000281701	FTL/FTH1/TFRC/VDAC2/HMOX1/GPX4	6	KEGG	LAM1: Cluster2
hsa04659	KEGG:Th17 cell differentiation	9/128	107/8104	4.4898e-05	0.00037415	0.000307197	HLA-DPA1/HLA-DRB5/HLA-DRB1/HLA-DMA/HLA-DPB1/HLA-DQA1/HLA-DMB/HLA-DRA/HLA-DQB1	9	KEGG	LAM1: Cluster2
hsa04514	KEGG:Cell adhesion molecules	10/128	149/8104	0.000115932	0.00092746	0.000761493	HLA-DPA1/HLA-DRB5/HLA-DRB1/HLA-DMA/HLA-DPB1/HLA-DQA1/HLA-DMB/HLA-DRA/HLA-DQB1/SPN	10	KEGG	LAM1: Cluster2
hsa05166	KEGG:Human T-cell leukemia virus 1 infection	12/128	219/8104	0.000168329	0.00129484	0.00106313	TSPO/HLA-DPA1/HLA-DRB5/HLA-DRB1/HLA-DMA/HLA-DPB1/HLA-DQA1/SPI1/HLA-DMB/HLA-DRA/HLA-DQB1/VDAC2	12	KEGG	LAM1: Cluster2
hsa03320	KEGG:PPAR signaling pathway	7/128	76/8104	0.000184087	0.0013636	0.00111959	LPL/FABP4/CYP27A1/OLR1/PPARG/FABP5/PLIN2	7	KEGG	LAM1: Cluster2
hsa00480	KEGG:Glutathione metabolism	6/128	57/8104	0.000259064	0.00185045	0.00151932	GPX1/GSTO1/G6PD/MGST3/PGD/GPX4	6	KEGG	LAM1: Cluster2
hsa04610	KEGG:Complement and coagulation cascades	7/128	85/8104	0.000369586	0.00249431	0.00204796	C1QB/C1QA/C1QC/VSIG4/SERPINA1/SERPING1/CFD	7	KEGG	LAM1: Cluster2
hsa05164	KEGG:Influenza A	10/128	172/8104	0.000374146	0.00249431	0.00204796	HLA-DPA1/HLA-DRB5/HLA-DRB1/HLA-DMA/HLA-DPB1/HLA-DQA1/HLA-DMB/HLA-DRA/HLA-DQB1/PYCARD	10	KEGG	LAM1: Cluster2
hsa05169	KEGG:Epstein-Barr virus infection	9/128	202/8104	0.0045944	0.0296413	0.0243371	HLA-DPA1/HLA-DRB5/HLA-DRB1/HLA-DMA/HLA-DPB1/HLA-DQA1/HLA-DMB/HLA-DRA/HLA-DQB1	9	KEGG	LAM1: Cluster2
hsa05133	KEGG:Pertussis	5/128	76/8104	0.00686403	0.0429002	0.0352233	C1QB/C1QA/C1QC/PYCARD/SERPING1	5	KEGG	LAM1: Cluster2
hsa01200	KEGG:Carbon metabolism	6/128	116/8104	0.00996144	0.0603723	0.0495689	FBP1/TKT/TALDO1/G6PD/ALDOA/PGD	6	KEGG	LAM1: Cluster2
hsa00051	KEGG:Fructose and mannose metabolism	3/128	33/8104	0.014867	0.0874527	0.0718032	FBP1/AKR1B1/ALDOA	3	KEGG	LAM1: Cluster2
hsa00590	KEGG:Arachidonic acid metabolism	4/128	61/8104	0.0154934	0.0885337	0.0726908	LTA4H/ALOX5/GPX1/PLAAT3	4	KEGG	LAM1: Cluster2
HALLMARK_COMPLEMENT	MSIGDB:COMPLEMENT	19/110	200/4384	3.52206e-07	1.44405e-05	1.22345e-05	C1QA/APOC1/C1QC/CTSD/LGALS3/FCER1G/CTSC/OLR1/LTA4H/FDX1/S100A9/SERPINA1/SERPING1/ANXA5/CTSB/CEBPB/LIPA/CTSL/PFN1	19	MSIGDB HALLMARK	LAM1: Cluster2
HALLMARK_ADIPOGENESIS	MSIGDB:ADIPOGENESIS	15/110	200/4384	0.000115163	0.00236085	0.00200021	LPL/FABP4/ALDH2/APOE/TKT/RMDN3/PPARG/TALDO1/MGST3/DECR1/ALDOA/REEP5/GPX4/RETN/PLIN2	15	MSIGDB HALLMARK	LAM1: Cluster2
HALLMARK_CHOLESTEROL_HOMEOSTASIS	MSIGDB:CHOLESTEROL_HOMEOSTASIS	8/110	74/4384	0.000462926	0.00632665	0.00536019	S100A11/ETHE1/LPL/LGALS3/CXCL16/ANXA5/PPARG/FABP5	8	MSIGDB HALLMARK	LAM1: Cluster2
HALLMARK_INTERFERON_GAMMA_RESPONSE	MSIGDB:INTERFERON_GAMMA_RESPONSE	11/110	200/4384	0.0109461	0.0897584	0.0760469	HLA-DRB1/HLA-DMA/CD74/HLA-DQA1/LY6E/LGALS3BP/SERPING1/FCGR1A/UPP1/IFI27/VAMP8	11	MSIGDB HALLMARK	LAM1: Cluster2
HALLMARK_XENOBIOTIC_METABOLISM	MSIGDB:XENOBIOTIC_METABOLISM	11/110	200/4384	0.0109461	0.0897584	0.0760469	FBP1/COMT/ALDH2/APOE/CYP27A1/CES1/GSTO1/UPP1/RBP4/HMOX1/PGD	11	MSIGDB HALLMARK	LAM1: Cluster2
GO:0043312	GO:neutrophil degranulation	45/190	485/18670	1.95252e-30	4.10736e-27	3.06675e-27	FTL/S100A11/GRN/TYROBP/CTSD/LGALS3/CD68/FCER1G/FTH1/CTSC/HP/CSTB/OLR1/LTA4H/RAB5C/ALOX5/PYCARD/LYZ/FCGR2A/S100A9/CST3/SERPINA1/CTSZ/LAMTOR1/CTSB/CREG1/SLC11A1/GAA/BRI3/DPP7/CYBA/MNDA/HEXB/LAMP1/PSAP/CFD/ALDOA/FABP5/OSCAR/STXBP2/CD63/RETN/ERP44/VAMP8/PDXK	45	GO	LAM1: Cluster2
GO:0002283	GO:neutrophil activation involved in immune response	45/190	488/18670	2.55115e-30	4.10736e-27	3.06675e-27	FTL/S100A11/GRN/TYROBP/CTSD/LGALS3/CD68/FCER1G/FTH1/CTSC/HP/CSTB/OLR1/LTA4H/RAB5C/ALOX5/PYCARD/LYZ/FCGR2A/S100A9/CST3/SERPINA1/CTSZ/LAMTOR1/CTSB/CREG1/SLC11A1/GAA/BRI3/DPP7/CYBA/MNDA/HEXB/LAMP1/PSAP/CFD/ALDOA/FABP5/OSCAR/STXBP2/CD63/RETN/ERP44/VAMP8/PDXK	45	GO	LAM1: Cluster2
GO:0042119	GO:neutrophil activation	45/190	498/18670	6.13842e-30	5.38892e-27	4.02364e-27	FTL/S100A11/GRN/TYROBP/CTSD/LGALS3/CD68/FCER1G/FTH1/CTSC/HP/CSTB/OLR1/LTA4H/RAB5C/ALOX5/PYCARD/LYZ/FCGR2A/S100A9/CST3/SERPINA1/CTSZ/LAMTOR1/CTSB/CREG1/SLC11A1/GAA/BRI3/DPP7/CYBA/MNDA/HEXB/LAMP1/PSAP/CFD/ALDOA/FABP5/OSCAR/STXBP2/CD63/RETN/ERP44/VAMP8/PDXK	45	GO	LAM1: Cluster2
GO:0002446	GO:neutrophil mediated immunity	45/190	499/18670	6.69432e-30	5.38892e-27	4.02364e-27	FTL/S100A11/GRN/TYROBP/CTSD/LGALS3/CD68/FCER1G/FTH1/CTSC/HP/CSTB/OLR1/LTA4H/RAB5C/ALOX5/PYCARD/LYZ/FCGR2A/S100A9/CST3/SERPINA1/CTSZ/LAMTOR1/CTSB/CREG1/SLC11A1/GAA/BRI3/DPP7/CYBA/MNDA/HEXB/LAMP1/PSAP/CFD/ALDOA/FABP5/OSCAR/STXBP2/CD63/RETN/ERP44/VAMP8/PDXK	45	GO	LAM1: Cluster2
GO:0048002	GO:antigen processing and presentation of peptide antigen	22/190	189/18670	2.9743e-17	1.91545e-14	1.43017e-14	CTSD/HLA-DPA1/HLA-DRB5/FCER1G/HLA-DRB1/HLA-DMA/HLA-DPB1/CD74/HLA-DQA1/HLA-DMB/HLA-DRA/HLA-DQB1/PYCARD/TREM2/FCGR1A/SLC11A1/NCF2/CYBA/CTSL/BCAP31/PSMA7/VAMP8	22	GO	LAM1: Cluster2
GO:0019882	GO:antigen processing and presentation	23/190	226/18670	1.10781e-16	5.94522e-14	4.43899e-14	CTSD/HLA-DPA1/HLA-DRB5/CD68/FCER1G/HLA-DRB1/HLA-DMA/HLA-DPB1/CD74/HLA-DQA1/HLA-DMB/HLA-DRA/HLA-DQB1/PYCARD/TREM2/FCGR1A/SLC11A1/NCF2/CYBA/CTSL/BCAP31/PSMA7/VAMP8	23	GO	LAM1: Cluster2
GO:0002495	GO:antigen processing and presentation of peptide antigen via MHC class II	15/190	101/18670	1.03187e-13	4.74659e-11	3.54403e-11	CTSD/HLA-DPA1/HLA-DRB5/FCER1G/HLA-DRB1/HLA-DMA/HLA-DPB1/CD74/HLA-DQA1/HLA-DMB/HLA-DRA/HLA-DQB1/PYCARD/TREM2/CTSL	15	GO	LAM1: Cluster2
GO:0002504	GO:antigen processing and presentation of peptide or polysaccharide antigen via MHC class II	15/190	102/18670	1.19912e-13	4.82647e-11	3.60368e-11	CTSD/HLA-DPA1/HLA-DRB5/FCER1G/HLA-DRB1/HLA-DMA/HLA-DPB1/CD74/HLA-DQA1/HLA-DMB/HLA-DRA/HLA-DQB1/PYCARD/TREM2/CTSL	15	GO	LAM1: Cluster2
GO:0002478	GO:antigen processing and presentation of exogenous peptide antigen	18/190	175/18670	2.26669e-13	8.1097e-11	6.0551e-11	CTSD/HLA-DPA1/HLA-DRB5/FCER1G/HLA-DRB1/HLA-DMA/HLA-DPB1/CD74/HLA-DQA1/HLA-DMB/HLA-DRA/HLA-DQB1/FCGR1A/NCF2/CYBA/CTSL/PSMA7/VAMP8	18	GO	LAM1: Cluster2
GO:0019884	GO:antigen processing and presentation of exogenous antigen	18/190	182/18670	4.47554e-13	1.44112e-10	1.07601e-10	CTSD/HLA-DPA1/HLA-DRB5/FCER1G/HLA-DRB1/HLA-DMA/HLA-DPB1/CD74/HLA-DQA1/HLA-DMB/HLA-DRA/HLA-DQB1/FCGR1A/NCF2/CYBA/CTSL/PSMA7/VAMP8	18	GO	LAM1: Cluster2
GO:0019886	GO:antigen processing and presentation of exogenous peptide antigen via MHC class II	13/190	98/18670	2.09898e-11	6.14428e-09	4.58762e-09	CTSD/HLA-DPA1/HLA-DRB5/FCER1G/HLA-DRB1/HLA-DMA/HLA-DPB1/CD74/HLA-DQA1/HLA-DMB/HLA-DRA/HLA-DQB1/CTSL	13	GO	LAM1: Cluster2
GO:0050670	GO:regulation of lymphocyte proliferation	16/190	208/18670	4.14305e-10	1.10149e-07	8.22426e-08	TYROBP/HLA-DPA1/LGALS3/VSIG4/HLA-DPB1/CD74/HLA-DMB/AIF1/PYCARD/GPNMB/CEBPB/MNDA/LGALS9/LST1/TFRC/SPN	16	GO	LAM1: Cluster2
GO:0032944	GO:regulation of mononuclear cell proliferation	16/190	209/18670	4.44701e-10	1.10149e-07	8.22426e-08	TYROBP/HLA-DPA1/LGALS3/VSIG4/HLA-DPB1/CD74/HLA-DMB/AIF1/PYCARD/GPNMB/CEBPB/MNDA/LGALS9/LST1/TFRC/SPN	16	GO	LAM1: Cluster2
GO:0070663	GO:regulation of leukocyte proliferation	16/190	222/18670	1.07837e-09	2.48026e-07	1.85189e-07	TYROBP/HLA-DPA1/LGALS3/VSIG4/HLA-DPB1/CD74/HLA-DMB/AIF1/PYCARD/GPNMB/CEBPB/MNDA/LGALS9/LST1/TFRC/SPN	16	GO	LAM1: Cluster2
GO:0070661	GO:leukocyte proliferation	18/190	298/18670	1.62552e-09	3.48945e-07	2.6054e-07	TYROBP/HLA-DPA1/LGALS3/VSIG4/HLA-DPB1/CD74/HLA-DMB/AIF1/PYCARD/TREM2/GPNMB/SLC11A1/CEBPB/MNDA/LGALS9/LST1/TFRC/SPN	18	GO	LAM1: Cluster2
GO:0046651	GO:lymphocyte proliferation	17/190	272/18670	2.81987e-09	5.67498e-07	4.23722e-07	TYROBP/HLA-DPA1/LGALS3/VSIG4/HLA-DPB1/CD74/HLA-DMB/AIF1/PYCARD/GPNMB/SLC11A1/CEBPB/MNDA/LGALS9/LST1/TFRC/SPN	17	GO	LAM1: Cluster2
GO:0032943	GO:mononuclear cell proliferation	17/190	274/18670	3.14984e-09	5.96616e-07	4.45463e-07	TYROBP/HLA-DPA1/LGALS3/VSIG4/HLA-DPB1/CD74/HLA-DMB/AIF1/PYCARD/GPNMB/SLC11A1/CEBPB/MNDA/LGALS9/LST1/TFRC/SPN	17	GO	LAM1: Cluster2
GO:0050727	GO:regulation of inflammatory response	22/190	485/18670	4.96193e-09	8.87635e-07	6.62752e-07	C1QB/C1QA/C1QC/GRN/LPL/FABP4/FCER1G/ACP5/VSIG4/APOE/CTSC/PYCARD/S100A9/TREM2/SERPING1/GPX1/PPARG/CEBPB/TMSB4X/NUPR1/GPX4/VAMP8	22	GO	LAM1: Cluster2
GO:0002576	GO:platelet degranulation	12/190	128/18670	7.38948e-09	1.25232e-06	9.35045e-07	FCER1G/LGALS3BP/SERPINA1/SERPING1/ANXA5/TMSB4X/VTI1B/PSAP/CFD/ALDOA/STXBP2/CD63	12	GO	LAM1: Cluster2
GO:0034341	GO:response to interferon-gamma	14/190	199/18670	1.67785e-08	2.5727e-06	1.92091e-06	HLA-DPA1/HLA-DRB5/CXCL16/HLA-DRB1/HLA-DPB1/HLA-DQA1/HLA-DRA/HLA-DQB1/AIF1/FCGR1A/SLC11A1/PPARG/LGALS9/STXBP2	14	GO	LAM1: Cluster2
GO:0050866	GO:negative regulation of cell activation	14/190	199/18670	1.67785e-08	2.5727e-06	1.92091e-06	GRN/TYROBP/LGALS3/VSIG4/INHBA/CD74/APOE/GPNMB/CEBPB/MNDA/LGALS9/LST1/SPN/HMOX1	14	GO	LAM1: Cluster2
GO:0002695	GO:negative regulation of leukocyte activation	13/190	175/18670	2.90176e-08	4.24712e-06	3.17111e-06	GRN/TYROBP/LGALS3/VSIG4/INHBA/CD74/GPNMB/CEBPB/MNDA/LGALS9/LST1/SPN/HMOX1	13	GO	LAM1: Cluster2
GO:0051235	GO:maintenance of location	17/190	330/18670	4.94429e-08	6.92201e-06	5.16831e-06	FTL/TSPO/LPL/FTH1/APOE/MSR1/ABHD5/S100A9/ANXA5/RER1/GAA/GSTO1/PPARG/CYBA/HEXB/TMSB4X/PLIN2	17	GO	LAM1: Cluster2
GO:0042098	GO:T cell proliferation	13/190	184/18670	5.26196e-08	7.0598e-06	5.2712e-06	HLA-DPA1/LGALS3/VSIG4/HLA-DPB1/HLA-DMB/AIF1/PYCARD/GPNMB/SLC11A1/CEBPB/LGALS9/TFRC/SPN	13	GO	LAM1: Cluster2
GO:0002683	GO:negative regulation of immune system process	20/190	463/18670	5.79709e-08	7.46666e-06	5.57497e-06	C1QC/GRN/TYROBP/LGALS3/CD68/FCER1G/VSIG4/INHBA/CD74/SERPING1/GPNMB/GPX1/PPARG/CEBPB/MNDA/LGALS9/LST1/CIB1/SPN/HMOX1	20	GO	LAM1: Cluster2
GO:0042129	GO:regulation of T cell proliferation	12/190	156/18670	6.83386e-08	8.46347e-06	6.31925e-06	HLA-DPA1/LGALS3/VSIG4/HLA-DPB1/HLA-DMB/AIF1/PYCARD/GPNMB/CEBPB/LGALS9/TFRC/SPN	12	GO	LAM1: Cluster2
GO:0045088	GO:regulation of innate immune response	19/190	452/18670	1.93172e-07	2.30375e-05	1.72009e-05	MARCO/GRN/FCER1G/VSIG4/APOE/COLEC12/PYCARD/S100A9/TREM2/SERPING1/CTSB/PPARG/CYBA/MNDA/LGALS9/UBB/LAMP1/CTSL/PSMA7	19	GO	LAM1: Cluster2
GO:0051250	GO:negative regulation of lymphocyte activation	11/190	146/18670	3.0106e-07	3.4622e-05	2.58505e-05	TYROBP/LGALS3/VSIG4/INHBA/CD74/GPNMB/CEBPB/MNDA/LGALS9/LST1/SPN	11	GO	LAM1: Cluster2
GO:0071346	GO:cellular response to interferon-gamma	12/190	180/18670	3.26631e-07	3.62673e-05	2.70789e-05	HLA-DPA1/HLA-DRB5/HLA-DRB1/HLA-DPB1/HLA-DQA1/HLA-DRA/HLA-DQB1/AIF1/FCGR1A/PPARG/LGALS9/STXBP2	12	GO	LAM1: Cluster2
GO:0060333	GO:interferon-gamma-mediated signaling pathway	9/190	91/18670	3.70072e-07	3.97211e-05	2.96577e-05	HLA-DPA1/HLA-DRB5/HLA-DRB1/HLA-DPB1/HLA-DQA1/HLA-DRA/HLA-DQB1/FCGR1A/PPARG	9	GO	LAM1: Cluster2
GO:0002526	GO:acute inflammatory response	13/190	220/18670	4.19897e-07	4.36152e-05	3.25652e-05	C1QB/C1QA/C1QC/FCER1G/VSIG4/HP/TREM1/SERPINA1/SERPING1/PPARG/CEBPB/NUPR1/CD163	13	GO	LAM1: Cluster2
GO:0042116	GO:macrophage activation	9/190	95/18670	5.35749e-07	5.39098e-05	4.02517e-05	C1QA/GRN/TYROBP/VSIG4/CD74/CTSC/AIF1/TREM2/SLC11A1	9	GO	LAM1: Cluster2
GO:0051249	GO:regulation of lymphocyte activation	19/190	485/18670	5.65146e-07	5.51446e-05	4.11736e-05	TYROBP/HLA-DPA1/LGALS3/VSIG4/INHBA/HLA-DPB1/CD74/HLA-DMB/AIF1/PYCARD/GPNMB/CEBPB/MNDA/LGALS9/LST1/LAMP1/TFRC/SPN/MAP3K8	19	GO	LAM1: Cluster2
GO:0046364	GO:monosaccharide biosynthetic process	9/190	98/18670	6.98975e-07	6.42596e-05	4.79794e-05	FBP1/TKT/AKR1B1/GPD1/TALDO1/G6PD/RBP4/ALDOA/PGD	9	GO	LAM1: Cluster2
GO:0032680	GO:regulation of tumor necrosis factor production	11/190	160/18670	7.54294e-07	6.42596e-05	4.79794e-05	TSPO/LPL/TYROBP/FCER1G/ACP5/PYCARD/TREM2/GPNMB/CYBA/LGALS9/SPN	11	GO	LAM1: Cluster2
GO:0010876	GO:lipid localization	17/190	400/18670	7.54302e-07	6.42596e-05	4.79794e-05	APOC1/TSPO/LPL/FABP4/INHBA/APOE/MSR1/ABHD5/CES1/LAMTOR1/PPARG/HEXB/NMB/PSAP/RBP4/RETN/PLIN2	17	GO	LAM1: Cluster2
GO:0032945	GO:negative regulation of mononuclear cell proliferation	8/190	73/18670	7.58343e-07	6.42596e-05	4.79794e-05	TYROBP/VSIG4/GPNMB/CEBPB/MNDA/LGALS9/LST1/SPN	8	GO	LAM1: Cluster2
GO:0050672	GO:negative regulation of lymphocyte proliferation	8/190	73/18670	7.58343e-07	6.42596e-05	4.79794e-05	TYROBP/VSIG4/GPNMB/CEBPB/MNDA/LGALS9/LST1/SPN	8	GO	LAM1: Cluster2
GO:0032640	GO:tumor necrosis factor production	11/190	163/18670	9.07158e-07	7.30262e-05	5.4525e-05	TSPO/LPL/TYROBP/FCER1G/ACP5/PYCARD/TREM2/GPNMB/CYBA/LGALS9/SPN	11	GO	LAM1: Cluster2
GO:1903555	GO:regulation of tumor necrosis factor superfamily cytokine production	11/190	163/18670	9.07158e-07	7.30262e-05	5.4525e-05	TSPO/LPL/TYROBP/FCER1G/ACP5/PYCARD/TREM2/GPNMB/CYBA/LGALS9/SPN	11	GO	LAM1: Cluster2
GO:0002697	GO:regulation of immune effector process	18/190	458/18670	1.08816e-06	8.54605e-05	6.3809e-05	C1QB/C1QA/C1QC/GRN/LGALS3/FCER1G/VSIG4/CD74/HLA-DMB/PYCARD/SERPING1/LGALS9/LAMP1/TFRC/RBP4/STXBP2/HMOX1/VAMP8	18	GO	LAM1: Cluster2
GO:0032103	GO:positive regulation of response to external stimulus	15/190	323/18670	1.16083e-06	8.85439e-05	6.61112e-05	GRN/LPL/FABP4/FCER1G/CD74/CTSC/AIF1/S100A9/TREM2/CEBPB/CYBA/LGALS9/TMSB4X/NUPR1/VAMP8	15	GO	LAM1: Cluster2
GO:0071706	GO:tumor necrosis factor superfamily cytokine production	11/190	168/18670	1.22308e-06	8.85439e-05	6.61112e-05	TSPO/LPL/TYROBP/FCER1G/ACP5/PYCARD/TREM2/GPNMB/CYBA/LGALS9/SPN	11	GO	LAM1: Cluster2
GO:0002573	GO:myeloid leukocyte differentiation	12/190	204/18670	1.24119e-06	8.85439e-05	6.61112e-05	C1QC/TYROBP/FCER1G/INHBA/CD74/SPI1/TREM2/PPARG/CEBPB/SNX10/TFRC/OSCAR	12	GO	LAM1: Cluster2
GO:0006909	GO:phagocytosis	16/190	369/18670	1.24576e-06	8.85439e-05	6.61112e-05	MARCO/TYROBP/FCER1G/MSR1/FCGR3A/COLEC12/AIF1/PYCARD/TULP1/FCGR2A/TREM2/FCGR1A/SLC11A1/NCF2/PPARG/CYBA	16	GO	LAM1: Cluster2
GO:0070664	GO:negative regulation of leukocyte proliferation	8/190	78/18670	1.26667e-06	8.85439e-05	6.61112e-05	TYROBP/VSIG4/GPNMB/CEBPB/MNDA/LGALS9/LST1/SPN	8	GO	LAM1: Cluster2
GO:0030099	GO:myeloid cell differentiation	17/190	416/18670	1.29241e-06	8.85439e-05	6.61112e-05	C1QC/TYROBP/LGALS3/FCER1G/INHBA/CD74/SPI1/TREM2/PPARG/CEBPB/CIB1/G6PD/SNX10/TFRC/FOXO3/OSCAR/DNASE2	17	GO	LAM1: Cluster2
GO:0002577	GO:regulation of antigen processing and presentation	5/190	20/18670	1.41816e-06	9.51351e-05	7.10325e-05	CD68/CD74/PYCARD/TREM2/SLC11A1	5	GO	LAM1: Cluster2
GO:0097193	GO:intrinsic apoptotic signaling pathway	14/190	289/18670	1.62795e-06	0.000106979	7.98761e-05	CD74/PHLDA3/PTPMT1/PYCARD/IFI6/S100A9/GPX1/GRINA/CEBPB/UBB/NUPR1/VDAC2/HMOX1/BCAP31	14	GO	LAM1: Cluster2
GO:0016042	GO:lipid catabolic process	15/190	333/18670	1.69548e-06	0.000109189	8.15258e-05	APOC1/LPL/FABP4/APOE/CYP27A1/PLD3/ABHD5/PLBD1/CES1/HEXB/PLAAT3/PSAP/LIPA/DECR1/FABP5	15	GO	LAM1: Cluster2
GO:0007159	GO:leukocyte cell-cell adhesion	15/190	337/18670	1.965e-06	0.000124065	9.2633e-05	HLA-DPA1/LGALS3/VSIG4/HLA-DPB1/CD74/HLA-DMB/AIF1/PYCARD/S100A9/GPNMB/CEBPB/LGALS9/TFRC/SPN/MAP3K8	15	GO	LAM1: Cluster2
GO:1903037	GO:regulation of leukocyte cell-cell adhesion	14/190	304/18670	2.94167e-06	0.000182157	0.000136008	HLA-DPA1/LGALS3/VSIG4/HLA-DPB1/CD74/HLA-DMB/AIF1/PYCARD/GPNMB/CEBPB/LGALS9/TFRC/SPN/MAP3K8	14	GO	LAM1: Cluster2
GO:0098883	GO:synapse pruning	4/190	11/18670	3.24325e-06	0.000197043	0.000147122	C1QB/C1QA/C1QC/TREM2	4	GO	LAM1: Cluster2
GO:0032602	GO:chemokine production	8/190	89/18670	3.46862e-06	0.000206832	0.000154431	LPL/CD74/AIF1/PYCARD/S100A9/TREM2/LGALS9/HMOX1	8	GO	LAM1: Cluster2
GO:0032675	GO:regulation of interleukin-6 production	10/190	152/18670	3.61255e-06	0.000211499	0.000157915	LPL/TYROBP/FCER1G/CD74/AIF1/PYCARD/TREM2/CEBPB/CYBA/LGALS9	10	GO	LAM1: Cluster2
GO:0050729	GO:positive regulation of inflammatory response	10/190	153/18670	3.83144e-06	0.000213857	0.000159676	GRN/LPL/FABP4/FCER1G/CTSC/S100A9/TREM2/CEBPB/NUPR1/VAMP8	10	GO	LAM1: Cluster2
GO:0006959	GO:humoral immune response	15/190	356/18670	3.84594e-06	0.000213857	0.000159676	C1QB/C1QA/C1QC/VSIG4/TREM1/HLA-DQB1/LYZ/S100A9/TREM2/SERPING1/SLC11A1/HMGN2/RGCC/CFD/CXCL3	15	GO	LAM1: Cluster2
GO:0006826	GO:iron ion transport	7/190	64/18670	3.85208e-06	0.000213857	0.000159676	FTL/FTH1/ATP6V0B/ATP6V1F/SLC11A1/ATP6V0D1/TFRC	7	GO	LAM1: Cluster2
GO:2001233	GO:regulation of apoptotic signaling pathway	16/190	406/18670	4.26856e-06	0.000229566	0.000171405	LGALS3/INHBA/CD74/CTSC/PTPMT1/PYCARD/IFI6/S100A9/GPX1/GRINA/LGALS9/UBB/NUPR1/VDAC2/HMOX1/BCAP31	16	GO	LAM1: Cluster2
GO:0050863	GO:regulation of T cell activation	14/190	314/18670	4.27762e-06	0.000229566	0.000171405	HLA-DPA1/LGALS3/VSIG4/HLA-DPB1/CD74/HLA-DMB/AIF1/PYCARD/GPNMB/CEBPB/LGALS9/TFRC/SPN/MAP3K8	14	GO	LAM1: Cluster2
GO:0001819	GO:positive regulation of cytokine production	17/190	464/18670	5.59741e-06	0.00029547	0.000220612	LPL/TYROBP/HLA-DPA1/FCER1G/HLA-DPB1/CD74/AIF1/PYCARD/TREM2/SLC11A1/CEBPB/CYBA/MNDA/LGALS9/RGCC/SPN/HMOX1	17	GO	LAM1: Cluster2
GO:0019915	GO:lipid storage	7/190	68/18670	5.80887e-06	0.000301687	0.000225254	LPL/APOE/MSR1/ABHD5/PPARG/HEXB/PLIN2	7	GO	LAM1: Cluster2
GO:0032635	GO:interleukin-6 production	10/190	161/18670	6.03766e-06	0.000308393	0.000230261	LPL/TYROBP/FCER1G/CD74/AIF1/PYCARD/TREM2/CEBPB/CYBA/LGALS9	10	GO	LAM1: Cluster2
GO:0032755	GO:positive regulation of interleukin-6 production	8/190	96/18670	6.12954e-06	0.000308393	0.000230261	LPL/TYROBP/FCER1G/CD74/AIF1/PYCARD/CYBA/LGALS9	8	GO	LAM1: Cluster2
GO:0030100	GO:regulation of endocytosis	13/190	281/18670	6.38533e-06	0.00031632	0.00023618	APOC1/LGALS3/FCER1G/APOE/RAB5C/PYCARD/TULP1/TREM2/LRPAP1/SLC11A1/PPARG/CYBA/CD63	13	GO	LAM1: Cluster2
GO:0043300	GO:regulation of leukocyte degranulation	6/190	46/18670	6.85402e-06	0.000334393	0.000249674	FCER1G/LGALS9/LAMP1/STXBP2/HMOX1/VAMP8	6	GO	LAM1: Cluster2
GO:0050766	GO:positive regulation of phagocytosis	7/190	70/18670	7.06101e-06	0.00033935	0.000253376	FCER1G/PYCARD/TULP1/TREM2/SLC11A1/PPARG/CYBA	7	GO	LAM1: Cluster2
GO:2001242	GO:regulation of intrinsic apoptotic signaling pathway	10/190	165/18670	7.50393e-06	0.000355333	0.000265309	CD74/PTPMT1/PYCARD/S100A9/GPX1/GRINA/UBB/NUPR1/VDAC2/BCAP31	10	GO	LAM1: Cluster2
GO:0002696	GO:positive regulation of leukocyte activation	15/190	380/18670	8.43317e-06	0.000393548	0.000293842	TYROBP/HLA-DPA1/FCER1G/HLA-DPB1/CD74/CTSC/HLA-DMB/AIF1/PYCARD/TREM2/LGALS9/LAMP1/TFRC/MAP3K8/VAMP8	15	GO	LAM1: Cluster2
GO:0001774	GO:microglial cell activation	6/190	48/18670	8.82921e-06	0.000399678	0.000298419	C1QA/GRN/TYROBP/CTSC/AIF1/TREM2	6	GO	LAM1: Cluster2
GO:0002269	GO:leukocyte activation involved in inflammatory response	6/190	48/18670	8.82921e-06	0.000399678	0.000298419	C1QA/GRN/TYROBP/CTSC/AIF1/TREM2	6	GO	LAM1: Cluster2
GO:0097237	GO:cellular response to toxic substance	12/190	247/18670	8.93689e-06	0.000399678	0.000298419	APOE/SPI1/HP/ALOX5AP/S100A9/GPX1/GSTO1/MGST3/PSAP/FOXO3/HMOX1/GPX4	12	GO	LAM1: Cluster2
GO:0098869	GO:cellular oxidant detoxification	8/190	102/18670	9.62423e-06	0.000424521	0.000316968	APOE/HP/ALOX5AP/S100A9/GPX1/GSTO1/MGST3/GPX4	8	GO	LAM1: Cluster2
GO:0001818	GO:negative regulation of cytokine production	13/190	296/18670	1.11561e-05	0.000480901	0.000359064	TSPO/TYROBP/ACP5/VSIG4/INHBA/PYCARD/TREM2/GPNMB/SLC11A1/LGALS9/TMSB4X/RGCC/HMOX1	13	GO	LAM1: Cluster2
GO:0150076	GO:neuroinflammatory response	7/190	75/18670	1.12011e-05	0.000480901	0.000359064	C1QA/GRN/TYROBP/CTSC/AIF1/TREM2/NUPR1	7	GO	LAM1: Cluster2
GO:0006641	GO:triglyceride metabolic process	8/190	105/18670	1.19231e-05	0.000505165	0.000377181	APOC1/LPL/FABP4/APOE/ABHD5/GPX1/PLAAT3/FABP5	8	GO	LAM1: Cluster2
GO:0050867	GO:positive regulation of cell activation	15/190	394/18670	1.29479e-05	0.000529614	0.000395436	TYROBP/HLA-DPA1/FCER1G/HLA-DPB1/CD74/CTSC/HLA-DMB/AIF1/PYCARD/TREM2/LGALS9/LAMP1/TFRC/MAP3K8/VAMP8	15	GO	LAM1: Cluster2
GO:0006098	GO:pentose-phosphate shunt	4/190	15/18670	1.29936e-05	0.000529614	0.000395436	TKT/TALDO1/G6PD/PGD	4	GO	LAM1: Cluster2
GO:0019321	GO:pentose metabolic process	4/190	15/18670	1.29936e-05	0.000529614	0.000395436	TKT/TALDO1/G6PD/PGD	4	GO	LAM1: Cluster2
GO:0043304	GO:regulation of mast cell degranulation	5/190	31/18670	1.41918e-05	0.00057122	0.000426501	FCER1G/LGALS9/STXBP2/HMOX1/VAMP8	5	GO	LAM1: Cluster2
GO:0050900	GO:leukocyte migration	17/190	499/18670	1.44315e-05	0.000573697	0.000428351	LGALS3/CXCL16/FCER1G/CD74/BSG/TREM1/OLR1/AIF1/DOK2/PYCARD/S100A9/TREM2/LGALS9/SPN/HMOX1/SLC7A7/CXCL3	17	GO	LAM1: Cluster2
GO:0033006	GO:regulation of mast cell activation involved in immune response	5/190	32/18670	1.66817e-05	0.000647052	0.000483121	FCER1G/LGALS9/STXBP2/HMOX1/VAMP8	5	GO	LAM1: Cluster2
GO:0055094	GO:response to lipoprotein particle	5/190	32/18670	1.66817e-05	0.000647052	0.000483121	LPL/CD68/FCER1G/APOE/PPARG	5	GO	LAM1: Cluster2
GO:0022407	GO:regulation of cell-cell adhesion	15/190	403/18670	1.68796e-05	0.000647052	0.000483121	HLA-DPA1/LGALS3/VSIG4/HLA-DPB1/CD74/HLA-DMB/AIF1/PYCARD/GPNMB/CEBPB/LGALS9/TFRC/RGCC/SPN/MAP3K8	15	GO	LAM1: Cluster2
GO:0019372	GO:lipoxygenase pathway	4/190	16/18670	1.71872e-05	0.000651091	0.000486136	ALOX5AP/ALOX5/GPX1/GPX4	4	GO	LAM1: Cluster2
GO:1990748	GO:cellular detoxification	8/190	112/18670	1.91395e-05	0.000716617	0.000535061	APOE/HP/ALOX5AP/S100A9/GPX1/GSTO1/MGST3/GPX4	8	GO	LAM1: Cluster2
GO:0046456	GO:icosanoid biosynthetic process	6/190	55/18670	1.96621e-05	0.000727723	0.000543354	CD74/ALOX5AP/LTA4H/ALOX5/MGST3/FABP5	6	GO	LAM1: Cluster2
GO:0032642	GO:regulation of chemokine production	7/190	82/18670	2.02074e-05	0.000739406	0.000552077	LPL/CD74/AIF1/PYCARD/TREM2/LGALS9/HMOX1	7	GO	LAM1: Cluster2
GO:0006690	GO:icosanoid metabolic process	8/190	114/18670	2.17727e-05	0.00078773	0.000588158	CD74/ALOX5AP/LTA4H/ALOX5/GPX1/MGST3/FABP5/GPX4	8	GO	LAM1: Cluster2
GO:0006898	GO:receptor-mediated endocytosis	13/190	316/18670	2.22512e-05	0.000793562	0.000592512	APOC1/MARCO/CXCL16/FCER1G/APOE/HP/MSR1/COLEC12/FCGR1A/LRPAP1/TFRC/CD163/CD63	13	GO	LAM1: Cluster2
GO:0042110	GO:T cell activation	16/190	464/18670	2.24582e-05	0.000793562	0.000592512	HLA-DPA1/LGALS3/FCER1G/VSIG4/HLA-DPB1/CD74/HLA-DMB/AIF1/PYCARD/GPNMB/SLC11A1/CEBPB/LGALS9/TFRC/SPN/MAP3K8	16	GO	LAM1: Cluster2
GO:0071402	GO:cellular response to lipoprotein particle stimulus	5/190	34/18670	2.26732e-05	0.000793562	0.000592512	LPL/CD68/FCER1G/APOE/PPARG	5	GO	LAM1: Cluster2
GO:0006869	GO:lipid transport	14/190	365/18670	2.33534e-05	0.000808581	0.000603727	APOC1/TSPO/FABP4/INHBA/APOE/MSR1/CES1/LAMTOR1/PPARG/NMB/PSAP/RBP4/RETN/PLIN2	14	GO	LAM1: Cluster2
GO:0019433	GO:triglyceride catabolic process	5/190	35/18670	2.62348e-05	0.000897805	0.000670346	LPL/FABP4/APOE/ABHD5/FABP5	5	GO	LAM1: Cluster2
GO:0032722	GO:positive regulation of chemokine production	6/190	58/18670	2.67669e-05	0.000897805	0.000670346	LPL/CD74/AIF1/PYCARD/LGALS9/HMOX1	6	GO	LAM1: Cluster2
GO:0061900	GO:glial cell activation	6/190	58/18670	2.67669e-05	0.000897805	0.000670346	C1QA/GRN/TYROBP/CTSC/AIF1/TREM2	6	GO	LAM1: Cluster2
GO:0045807	GO:positive regulation of endocytosis	9/190	153/18670	2.73929e-05	0.000906846	0.000677096	FCER1G/APOE/PYCARD/TULP1/TREM2/SLC11A1/PPARG/CYBA/CD63	9	GO	LAM1: Cluster2
GO:0032760	GO:positive regulation of tumor necrosis factor production	7/190	86/18670	2.75996e-05	0.000906846	0.000677096	LPL/TYROBP/FCER1G/PYCARD/CYBA/LGALS9/SPN	7	GO	LAM1: Cluster2
GO:0097242	GO:amyloid-beta clearance	5/190	36/18670	3.02161e-05	0.000982787	0.000733797	MARCO/APOE/MSR1/TREM2/LRPAP1	5	GO	LAM1: Cluster2
GO:0072524	GO:pyridine-containing compound metabolic process	10/190	195/18670	3.20336e-05	0.00102197	0.000763056	FBP1/TKT/GPD1/TALDO1/G6PD/ALDOA/NUPR1/PGD/PDXK/MPC1	10	GO	LAM1: Cluster2
GO:1903557	GO:positive regulation of tumor necrosis factor superfamily cytokine production	7/190	88/18670	3.20557e-05	0.00102197	0.000763056	LPL/TYROBP/FCER1G/PYCARD/CYBA/LGALS9/SPN	7	GO	LAM1: Cluster2
GO:1905952	GO:regulation of lipid localization	9/190	157/18670	3.35812e-05	0.00104924	0.000783418	APOC1/TSPO/LPL/APOE/MSR1/ABHD5/LAMTOR1/PPARG/RETN	9	GO	LAM1: Cluster2
GO:0051048	GO:negative regulation of secretion	11/190	238/18670	3.36793e-05	0.00104924	0.000783418	COMT/INHBA/CD74/APOE/ANXA5/LGALS9/TMSB4X/NMB/RGCC/HMOX1/VAMP8	11	GO	LAM1: Cluster2
GO:0051047	GO:positive regulation of secretion	15/190	428/18670	3.38886e-05	0.00104924	0.000783418	LPL/FCER1G/INHBA/AIF1/PYCARD/TREM2/CYBA/LGALS9/NMB/LAMP1/RGCC/RBP4/GLUL/RETN/VAMP8	15	GO	LAM1: Cluster2
GO:0045730	GO:respiratory burst	5/190	37/18670	3.46506e-05	0.00106262	0.000793403	GRN/SLC11A1/NCF2/CYBA/CD52	5	GO	LAM1: Cluster2
GO:0072593	GO:reactive oxygen species metabolic process	12/190	284/18670	3.56902e-05	0.00107745	0.000804475	TSPO/TYROBP/GCHFR/ACP5/HP/AIF1/IFI6/GPX1/NCF2/CYBA/G6PD/FOXO3	12	GO	LAM1: Cluster2
GO:0006879	GO:cellular iron ion homeostasis	6/190	61/18670	3.58034e-05	0.00107745	0.000804475	FTL/FTH1/SLC11A1/ATP6V0D1/TFRC/HMOX1	6	GO	LAM1: Cluster2
GO:0032651	GO:regulation of interleukin-1 beta production	7/190	90/18670	3.70871e-05	0.00110574	0.000825603	LPL/TYROBP/ACP5/PYCARD/TREM2/MNDA/LGALS9	7	GO	LAM1: Cluster2
GO:0006631	GO:fatty acid metabolic process	14/190	383/18670	3.95451e-05	0.00116821	0.000872245	APOC1/LPL/CD74/ALOX5AP/LTA4H/ALOX5/ABHD5/CES1/ACOT2/GPX1/PPARG/DECR1/FABP5/GPX4	14	GO	LAM1: Cluster2
GO:0019370	GO:leukotriene biosynthetic process	4/190	20/18670	4.43178e-05	0.0012973	0.000968631	ALOX5AP/LTA4H/ALOX5/MGST3	4	GO	LAM1: Cluster2
GO:0005996	GO:monosaccharide metabolic process	12/190	292/18670	4.67252e-05	0.00135523	0.00101188	FBP1/TKT/AKR1B1/GPD1/GAA/GSTO1/TALDO1/G6PD/RBP4/ALDOA/FABP5/PGD	12	GO	LAM1: Cluster2
GO:0046503	GO:glycerolipid catabolic process	6/190	64/18670	4.71385e-05	0.00135523	0.00101188	APOC1/LPL/FABP4/APOE/ABHD5/FABP5	6	GO	LAM1: Cluster2
GO:0072330	GO:monocarboxylic acid biosynthetic process	13/190	343/18670	5.19206e-05	0.00147052	0.00109796	APOC1/FBP1/LPL/CD74/CYP27A1/ALOX5AP/LTA4H/ALOX5/GPD1/ALDOA/FABP5/NUPR1/GPX4	13	GO	LAM1: Cluster2
GO:0042102	GO:positive regulation of T cell proliferation	7/190	95/18670	5.25577e-05	0.00147052	0.00109796	HLA-DPA1/HLA-DPB1/HLA-DMB/AIF1/PYCARD/LGALS9/TFRC	7	GO	LAM1: Cluster2
GO:0051651	GO:maintenance of location in cell	7/190	95/18670	5.25577e-05	0.00147052	0.00109796	FTL/TSPO/FTH1/APOE/RER1/GAA/TMSB4X	7	GO	LAM1: Cluster2
GO:0006639	GO:acylglycerol metabolic process	8/190	129/18670	5.29754e-05	0.00147052	0.00109796	APOC1/LPL/FABP4/APOE/ABHD5/GPX1/PLAAT3/FABP5	8	GO	LAM1: Cluster2
GO:0019682	GO:glyceraldehyde-3-phosphate metabolic process	4/190	21/18670	5.43112e-05	0.00149472	0.00111603	TKT/TALDO1/G6PD/PGD	4	GO	LAM1: Cluster2
GO:0006638	GO:neutral lipid metabolic process	8/190	130/18670	5.59641e-05	0.00150828	0.00112616	APOC1/LPL/FABP4/APOE/ABHD5/GPX1/PLAAT3/FABP5	8	GO	LAM1: Cluster2
GO:0050671	GO:positive regulation of lymphocyte proliferation	8/190	130/18670	5.59641e-05	0.00150828	0.00112616	HLA-DPA1/HLA-DPB1/CD74/HLA-DMB/AIF1/PYCARD/LGALS9/TFRC	8	GO	LAM1: Cluster2
GO:0002474	GO:antigen processing and presentation of peptide antigen via MHC class I	7/190	96/18670	5.62094e-05	0.00150828	0.00112616	FCER1G/FCGR1A/NCF2/CYBA/BCAP31/PSMA7/VAMP8	7	GO	LAM1: Cluster2
GO:0032946	GO:positive regulation of mononuclear cell proliferation	8/190	131/18670	5.90919e-05	0.00155964	0.0011645	HLA-DPA1/HLA-DPB1/CD74/HLA-DMB/AIF1/PYCARD/LGALS9/TFRC	8	GO	LAM1: Cluster2
GO:0098754	GO:detoxification	8/190	131/18670	5.90919e-05	0.00155964	0.0011645	APOE/HP/ALOX5AP/S100A9/GPX1/GSTO1/MGST3/GPX4	8	GO	LAM1: Cluster2
GO:0030316	GO:osteoclast differentiation	7/190	97/18670	6.00661e-05	0.00157246	0.00117408	TYROBP/FCER1G/TREM2/CEBPB/SNX10/TFRC/OSCAR	7	GO	LAM1: Cluster2
GO:1903532	GO:positive regulation of secretion by cell	14/190	399/18670	6.14761e-05	0.0015964	0.00119195	LPL/FCER1G/INHBA/AIF1/PYCARD/TREM2/LGALS9/NMB/LAMP1/RGCC/RBP4/GLUL/RETN/VAMP8	14	GO	LAM1: Cluster2
GO:0052547	GO:regulation of peptidase activity	15/190	452/18670	6.2945e-05	0.00162146	0.00121066	GRN/CTSD/CSTB/PCOLCE2/PYCARD/IFI6/S100A9/CST3/SERPINA1/CSTA/SERPING1/GPX1/PPARG/LGALS9/BCAP31	15	GO	LAM1: Cluster2
GO:0050764	GO:regulation of phagocytosis	7/190	98/18670	6.41366e-05	0.00163905	0.00122379	FCER1G/PYCARD/TULP1/TREM2/SLC11A1/PPARG/CYBA	7	GO	LAM1: Cluster2
GO:0033003	GO:regulation of mast cell activation	5/190	42/18670	6.48933e-05	0.00164533	0.00122848	FCER1G/LGALS9/STXBP2/HMOX1/VAMP8	5	GO	LAM1: Cluster2
GO:0034381	GO:plasma lipoprotein particle clearance	6/190	69/18670	7.22652e-05	0.00179325	0.00133893	APOC1/APOE/MSR1/LRPAP1/LIPA/HMOX1	6	GO	LAM1: Cluster2
GO:0046461	GO:neutral lipid catabolic process	5/190	43/18670	7.28298e-05	0.00179325	0.00133893	LPL/FABP4/APOE/ABHD5/FABP5	5	GO	LAM1: Cluster2
GO:0046464	GO:acylglycerol catabolic process	5/190	43/18670	7.28298e-05	0.00179325	0.00133893	LPL/FABP4/APOE/ABHD5/FABP5	5	GO	LAM1: Cluster2
GO:0030301	GO:cholesterol transport	7/190	100/18670	7.2955e-05	0.00179325	0.00133893	APOC1/TSPO/APOE/MSR1/CES1/LAMTOR1/PPARG	7	GO	LAM1: Cluster2
GO:0062012	GO:regulation of small molecule metabolic process	15/190	459/18670	7.47704e-05	0.00182395	0.00136185	APOC1/FBP1/TSPO/COMT/CD74/APOE/TREM2/OAZ1/GPD1/PPARG/TMSB4X/FABP5/NUPR1/SLC7A7/PSMA7	15	GO	LAM1: Cluster2
GO:0002699	GO:positive regulation of immune effector process	10/190	216/18670	7.58734e-05	0.00183694	0.00137155	FCER1G/CD74/HLA-DMB/LGALS9/LAMP1/TFRC/RBP4/STXBP2/HMOX1/VAMP8	10	GO	LAM1: Cluster2
GO:0032611	GO:interleukin-1 beta production	7/190	101/18670	7.77216e-05	0.0018538	0.00138414	LPL/TYROBP/ACP5/PYCARD/TREM2/MNDA/LGALS9	7	GO	LAM1: Cluster2
GO:0097006	GO:regulation of plasma lipoprotein particle levels	7/190	101/18670	7.77216e-05	0.0018538	0.00138414	APOC1/LPL/APOE/MSR1/LRPAP1/LIPA/HMOX1	7	GO	LAM1: Cluster2
GO:0046394	GO:carboxylic acid biosynthetic process	15/190	462/18670	8.04068e-05	0.00190375	0.00142143	APOC1/FBP1/LPL/CD74/CYP27A1/ALOX5AP/LTA4H/ALOX5/GPD1/MGST3/ALDOA/FABP5/NUPR1/GLUL/GPX4	15	GO	LAM1: Cluster2
GO:0016053	GO:organic acid biosynthetic process	15/190	463/18670	8.23665e-05	0.00193591	0.00144545	APOC1/FBP1/LPL/CD74/CYP27A1/ALOX5AP/LTA4H/ALOX5/GPD1/MGST3/ALDOA/FABP5/NUPR1/GLUL/GPX4	15	GO	LAM1: Cluster2
GO:0032652	GO:regulation of interleukin-1 production	7/190	103/18670	8.80181e-05	0.00205376	0.00153343	LPL/TYROBP/ACP5/PYCARD/TREM2/MNDA/LGALS9	7	GO	LAM1: Cluster2
GO:0070665	GO:positive regulation of leukocyte proliferation	8/190	139/18670	8.97545e-05	0.0020792	0.00155244	HLA-DPA1/HLA-DPB1/CD74/HLA-DMB/AIF1/PYCARD/LGALS9/TFRC	8	GO	LAM1: Cluster2
GO:1901214	GO:regulation of neuron death	12/190	313/18670	9.07653e-05	0.0020876	0.00155871	C1QA/GRN/TYROBP/APOE/CTSZ/GPNMB/CEBPB/UBB/G6PD/FOXO3/NUPR1/HMOX1	12	GO	LAM1: Cluster2
GO:0032418	GO:lysosome localization	6/190	74/18670	0.000107077	0.00244529	0.00182578	FCER1G/LAMTOR1/LGALS9/STXBP2/HMOX1/VAMP8	6	GO	LAM1: Cluster2
GO:0051156	GO:glucose 6-phosphate metabolic process	4/190	25/18670	0.000111196	0.00252148	0.00188266	TKT/TALDO1/G6PD/PGD	4	GO	LAM1: Cluster2
GO:0043303	GO:mast cell degranulation	5/190	47/18670	0.0001123	0.00252871	0.00188806	FCER1G/LGALS9/STXBP2/HMOX1/VAMP8	5	GO	LAM1: Cluster2
GO:0002291	GO:T cell activation via T cell receptor contact with antigen bound to MHC molecule on antigen presenting cell	3/190	10/18670	0.000118113	0.00261778	0.00195456	LGALS3/HLA-DMB/LGALS9	3	GO	LAM1: Cluster2
GO:0034447	GO:very-low-density lipoprotein particle clearance	3/190	10/18670	0.000118113	0.00261778	0.00195456	APOC1/APOE/LRPAP1	3	GO	LAM1: Cluster2
GO:0046916	GO:cellular transition metal ion homeostasis	7/190	108/18670	0.000118694	0.00261778	0.00195456	FTL/FTH1/S100A9/SLC11A1/ATP6V0D1/TFRC/HMOX1	7	GO	LAM1: Cluster2
GO:0045454	GO:cell redox homeostasis	6/190	76/18670	0.000124258	0.00270505	0.00201972	GLRX/GPX1/SLC11A1/NCF2/CYBA/ERP44	6	GO	LAM1: Cluster2
GO:0002279	GO:mast cell activation involved in immune response	5/190	48/18670	0.000124331	0.00270505	0.00201972	FCER1G/LGALS9/STXBP2/HMOX1/VAMP8	5	GO	LAM1: Cluster2
GO:0097066	GO:response to thyroid hormone	4/190	26/18670	0.000130372	0.00281744	0.00210364	AKR1B1/ANXA5/CTSB/CTSL	4	GO	LAM1: Cluster2
GO:0002448	GO:mast cell mediated immunity	5/190	49/18670	0.000137326	0.00293102	0.00218844	FCER1G/LGALS9/STXBP2/HMOX1/VAMP8	5	GO	LAM1: Cluster2
GO:0048871	GO:multicellular organismal homeostasis	15/190	485/18670	0.000137448	0.00293102	0.00218844	FABP4/ACP5/LYZ/TULP1/AKR1B1/GPX1/SLC11A1/CEBPB/UBB/SNX10/TFRC/LIPA/DECR1/RBP4/FABP5	15	GO	LAM1: Cluster2
GO:0019362	GO:pyridine nucleotide metabolic process	9/190	189/18670	0.000140538	0.00295773	0.00220839	FBP1/TKT/GPD1/TALDO1/G6PD/ALDOA/NUPR1/PGD/MPC1	9	GO	LAM1: Cluster2
GO:0046496	GO:nicotinamide nucleotide metabolic process	9/190	189/18670	0.000140538	0.00295773	0.00220839	FBP1/TKT/GPD1/TALDO1/G6PD/ALDOA/NUPR1/PGD/MPC1	9	GO	LAM1: Cluster2
GO:0000041	GO:transition metal ion transport	7/190	112/18670	0.000149046	0.00305741	0.00228282	FTL/FTH1/ATP6V0B/ATP6V1F/SLC11A1/ATP6V0D1/TFRC	7	GO	LAM1: Cluster2
GO:0015918	GO:sterol transport	7/190	112/18670	0.000149046	0.00305741	0.00228282	APOC1/TSPO/APOE/MSR1/CES1/LAMTOR1/PPARG	7	GO	LAM1: Cluster2
GO:0050868	GO:negative regulation of T cell activation	7/190	112/18670	0.000149046	0.00305741	0.00228282	LGALS3/VSIG4/CD74/GPNMB/CEBPB/LGALS9/SPN	7	GO	LAM1: Cluster2
GO:0042742	GO:defense response to bacterium	12/190	330/18670	0.000149073	0.00305741	0.00228282	GRN/FCER1G/ACP5/HP/PYCARD/LYZ/S100A9/TREM2/SLC11A1/CEBPB/CYBA/SPN	12	GO	LAM1: Cluster2
GO:0050777	GO:negative regulation of immune response	8/190	150/18670	0.000152455	0.00310037	0.00231489	GRN/LGALS3/VSIG4/SERPING1/GPX1/PPARG/LGALS9/HMOX1	8	GO	LAM1: Cluster2
GO:0042590	GO:antigen processing and presentation of exogenous peptide antigen via MHC class I	6/190	79/18670	0.000154056	0.00310037	0.00231489	FCER1G/FCGR1A/NCF2/CYBA/PSMA7/VAMP8	6	GO	LAM1: Cluster2
GO:0055072	GO:iron ion homeostasis	6/190	79/18670	0.000154056	0.00310037	0.00231489	FTL/FTH1/SLC11A1/ATP6V0D1/TFRC/HMOX1	6	GO	LAM1: Cluster2
GO:0032609	GO:interferon-gamma production	7/190	113/18670	0.00015754	0.00315079	0.00235254	HLA-DPA1/INHBA/HLA-DPB1/PYCARD/SLC11A1/LGALS9/SPN	7	GO	LAM1: Cluster2
GO:0002604	GO:regulation of dendritic cell antigen processing and presentation	3/190	11/18670	0.000161189	0.00320387	0.00239217	CD68/CD74/SLC11A1	3	GO	LAM1: Cluster2
GO:0051452	GO:intracellular pH reduction	5/190	51/18670	0.000166412	0.0032874	0.00245453	GRN/ATP6V0B/ATP6V1F/SLC11A1/ATP6V0D1	5	GO	LAM1: Cluster2
GO:0032612	GO:interleukin-1 production	7/190	115/18670	0.000175705	0.0034289	0.00256019	LPL/TYROBP/ACP5/PYCARD/TREM2/MNDA/LGALS9	7	GO	LAM1: Cluster2
GO:0046660	GO:female sex differentiation	7/190	115/18670	0.000175705	0.0034289	0.00256019	INHBA/CEBPB/UBB/FOXO3/RBP4/NUPR1/RETN	7	GO	LAM1: Cluster2
GO:0032653	GO:regulation of interleukin-10 production	5/190	52/18670	0.000182609	0.00352096	0.00262892	TYROBP/FCER1G/PYCARD/TREM2/LGALS9	5	GO	LAM1: Cluster2
GO:0032731	GO:positive regulation of interleukin-1 beta production	5/190	52/18670	0.000182609	0.00352096	0.00262892	LPL/TYROBP/PYCARD/MNDA/LGALS9	5	GO	LAM1: Cluster2
GO:0006968	GO:cellular defense response	5/190	53/18670	0.000199981	0.00381029	0.00284495	TYROBP/LGALS3BP/NCF2/MNDA/SPN	5	GO	LAM1: Cluster2
GO:0045851	GO:pH reduction	5/190	53/18670	0.000199981	0.00381029	0.00284495	GRN/ATP6V0B/ATP6V1F/SLC11A1/ATP6V0D1	5	GO	LAM1: Cluster2
GO:0006911	GO:phagocytosis, engulfment	7/190	118/18670	0.000206095	0.00390368	0.00291468	MARCO/FCER1G/MSR1/AIF1/TREM2/FCGR1A/PPARG	7	GO	LAM1: Cluster2
GO:0002468	GO:dendritic cell antigen processing and presentation	3/190	12/18670	0.000213309	0.00399335	0.00298163	CD68/CD74/SLC11A1	3	GO	LAM1: Cluster2
GO:0010889	GO:regulation of sequestering of triglyceride	3/190	12/18670	0.000213309	0.00399335	0.00298163	LPL/ABHD5/PPARG	3	GO	LAM1: Cluster2
GO:0048872	GO:homeostasis of number of cells	10/190	246/18670	0.000220016	0.0040951	0.0030576	FCER1G/INHBA/CD74/SPI1/LGALS9/G6PD/FOXO3/LIPA/HMOX1/DNASE2	10	GO	LAM1: Cluster2
GO:0050852	GO:T cell receptor signaling pathway	9/190	202/18670	0.000231358	0.00425699	0.00317848	HLA-DPA1/HLA-DRB5/LGALS3/HLA-DRB1/HLA-DPB1/HLA-DQA1/HLA-DRA/HLA-DQB1/PSMA7	9	GO	LAM1: Cluster2
GO:0050870	GO:positive regulation of T cell activation	9/190	202/18670	0.000231358	0.00425699	0.00317848	HLA-DPA1/HLA-DPB1/CD74/HLA-DMB/AIF1/PYCARD/LGALS9/TFRC/MAP3K8	9	GO	LAM1: Cluster2
GO:0042180	GO:cellular ketone metabolic process	10/190	248/18670	0.0002348	0.00428992	0.00320306	APOC1/COMT/CD74/AKR1B1/OAZ1/GPD1/PPARG/FABP5/SLC7A7/PSMA7	10	GO	LAM1: Cluster2
GO:0002886	GO:regulation of myeloid leukocyte mediated immunity	5/190	55/18670	0.000238477	0.00428992	0.00320306	FCER1G/LGALS9/STXBP2/HMOX1/VAMP8	5	GO	LAM1: Cluster2
GO:0032613	GO:interleukin-10 production	5/190	55/18670	0.000238477	0.00428992	0.00320306	TYROBP/FCER1G/PYCARD/TREM2/LGALS9	5	GO	LAM1: Cluster2
GO:0043030	GO:regulation of macrophage activation	5/190	55/18670	0.000238477	0.00428992	0.00320306	GRN/VSIG4/CD74/CTSC/TREM2	5	GO	LAM1: Cluster2
GO:0070997	GO:neuron death	12/190	348/18670	0.000243222	0.00435097	0.00324865	C1QA/GRN/TYROBP/APOE/CTSZ/GPNMB/CEBPB/UBB/G6PD/FOXO3/NUPR1/HMOX1	12	GO	LAM1: Cluster2
GO:0045637	GO:regulation of myeloid cell differentiation	10/190	251/18670	0.000258533	0.00459932	0.00343408	C1QC/TYROBP/LGALS3/INHBA/CD74/SPI1/TREM2/CEBPB/CIB1/FOXO3	10	GO	LAM1: Cluster2
GO:0006691	GO:leukotriene metabolic process	4/190	31/18670	0.000263704	0.00466553	0.00348352	ALOX5AP/LTA4H/ALOX5/MGST3	4	GO	LAM1: Cluster2
GO:0002449	GO:lymphocyte mediated immunity	12/190	352/18670	0.000269925	0.0047495	0.00354621	C1QB/C1QA/C1QC/FCER1G/CD74/CTSC/HLA-DQB1/SERPING1/SLC11A1/LGALS9/LAMP1/TFRC	12	GO	LAM1: Cluster2
GO:0002281	GO:macrophage activation involved in immune response	3/190	13/18670	0.000275228	0.00479045	0.00357678	GRN/TYROBP/TREM2	3	GO	LAM1: Cluster2
GO:0010872	GO:regulation of cholesterol esterification	3/190	13/18670	0.000275228	0.00479045	0.00357678	APOC1/APOE/LAMTOR1	3	GO	LAM1: Cluster2
GO:0006733	GO:oxidoreduction coenzyme metabolic process	9/190	207/18670	0.000277297	0.00480051	0.0035843	FBP1/TKT/GPD1/TALDO1/G6PD/ALDOA/NUPR1/PGD/MPC1	9	GO	LAM1: Cluster2
GO:0006633	GO:fatty acid biosynthetic process	8/190	164/18670	0.000280523	0.0048304	0.00360662	APOC1/LPL/CD74/ALOX5AP/LTA4H/ALOX5/FABP5/GPX4	8	GO	LAM1: Cluster2
GO:0043525	GO:positive regulation of neuron apoptotic process	5/190	57/18670	0.000282362	0.00483619	0.00361094	GRN/TYROBP/CTSZ/FOXO3/NUPR1	5	GO	LAM1: Cluster2
GO:0006739	GO:NADP metabolic process	4/190	32/18670	0.000298993	0.00506714	0.00378338	TKT/TALDO1/G6PD/PGD	4	GO	LAM1: Cluster2
GO:2000778	GO:positive regulation of interleukin-6 secretion	4/190	32/18670	0.000298993	0.00506714	0.00378338	LPL/AIF1/PYCARD/LGALS9	4	GO	LAM1: Cluster2
GO:0043523	GO:regulation of neuron apoptotic process	9/190	210/18670	0.000308317	0.0051978	0.00388094	GRN/TYROBP/APOE/CTSZ/CEBPB/G6PD/FOXO3/NUPR1/HMOX1	9	GO	LAM1: Cluster2
GO:1901568	GO:fatty acid derivative metabolic process	8/190	167/18670	0.000317042	0.00531705	0.00396997	CD74/ALOX5AP/LTA4H/ALOX5/GPX1/MGST3/FABP5/GPX4	8	GO	LAM1: Cluster2
GO:1903531	GO:negative regulation of secretion by cell	9/190	211/18670	0.000319274	0.00532675	0.00397721	INHBA/APOE/ANXA5/LGALS9/TMSB4X/NMB/RGCC/HMOX1/VAMP8	9	GO	LAM1: Cluster2
GO:0099024	GO:plasma membrane invagination	7/190	127/18670	0.000323536	0.00537003	0.00400953	MARCO/FCER1G/MSR1/AIF1/TREM2/FCGR1A/PPARG	7	GO	LAM1: Cluster2
GO:0032732	GO:positive regulation of interleukin-1 production	5/190	59/18670	0.000332116	0.00542849	0.00405318	LPL/TYROBP/PYCARD/MNDA/LGALS9	5	GO	LAM1: Cluster2
GO:0042130	GO:negative regulation of T cell proliferation	5/190	59/18670	0.000332116	0.00542849	0.00405318	VSIG4/GPNMB/CEBPB/LGALS9/SPN	5	GO	LAM1: Cluster2
GO:0045824	GO:negative regulation of innate immune response	5/190	59/18670	0.000332116	0.00542849	0.00405318	GRN/VSIG4/SERPING1/PPARG/LGALS9	5	GO	LAM1: Cluster2
GO:0002687	GO:positive regulation of leukocyte migration	7/190	128/18670	0.000339354	0.00551878	0.00412059	LGALS3/CD74/AIF1/PYCARD/TREM2/LGALS9/SPN	7	GO	LAM1: Cluster2
GO:0016051	GO:carbohydrate biosynthetic process	9/190	214/18670	0.000354094	0.00570001	0.00425591	FBP1/TKT/AKR1B1/GPD1/TALDO1/G6PD/RBP4/ALDOA/PGD	9	GO	LAM1: Cluster2
GO:1903038	GO:negative regulation of leukocyte cell-cell adhesion	7/190	129/18670	0.000355785	0.00570001	0.00425591	LGALS3/VSIG4/CD74/GPNMB/CEBPB/LGALS9/SPN	7	GO	LAM1: Cluster2
GO:0045862	GO:positive regulation of proteolysis	12/190	363/18670	0.000356557	0.00570001	0.00425591	GRN/CTSD/APOE/CTSC/PCOLCE2/PYCARD/S100A9/TREM2/PPARG/LGALS9/NUPR1/BCAP31	12	GO	LAM1: Cluster2
GO:0002429	GO:immune response-activating cell surface receptor signaling pathway	14/190	473/18670	0.000358845	0.00570001	0.00425591	HLA-DPA1/HLA-DRB5/LGALS3/FCER1G/HLA-DRB1/HLA-DPB1/HLA-DQA1/HLA-DRA/FCGR3A/HLA-DQB1/FCGR2A/FCGR1A/MNDA/PSMA7	14	GO	LAM1: Cluster2
GO:0045576	GO:mast cell activation	5/190	60/18670	0.000359348	0.00570001	0.00425591	FCER1G/LGALS9/STXBP2/HMOX1/VAMP8	5	GO	LAM1: Cluster2
GO:0070374	GO:positive regulation of ERK1 and ERK2 cascade	9/190	215/18670	0.000366375	0.00578298	0.00431786	MARCO/CD74/APOE/PYCARD/TREM2/GPNMB/LGALS9/CIB1/GLIPR2	9	GO	LAM1: Cluster2
GO:0031330	GO:negative regulation of cellular catabolic process	10/190	264/18670	0.000385932	0.00606195	0.00452615	APOC1/FBP1/TSPO/HP/CST3/TREM2/SLC11A1/NUPR1/HMOX1/YBX1	10	GO	LAM1: Cluster2
GO:0055076	GO:transition metal ion homeostasis	7/190	131/18670	0.00039056	0.00609767	0.00455282	FTL/FTH1/S100A9/SLC11A1/ATP6V0D1/TFRC/HMOX1	7	GO	LAM1: Cluster2
GO:0044242	GO:cellular lipid catabolic process	9/190	217/18670	0.000391993	0.00609767	0.00455282	APOC1/LPL/FABP4/APOE/ABHD5/HEXB/PSAP/DECR1/FABP5	9	GO	LAM1: Cluster2
GO:1901216	GO:positive regulation of neuron death	6/190	94/18670	0.000397914	0.00616001	0.00459937	C1QA/GRN/TYROBP/CTSZ/FOXO3/NUPR1	6	GO	LAM1: Cluster2
GO:1903039	GO:positive regulation of leukocyte cell-cell adhesion	9/190	218/18670	0.000405346	0.00624504	0.00466286	HLA-DPA1/HLA-DPB1/CD74/HLA-DMB/AIF1/PYCARD/LGALS9/TFRC/MAP3K8	9	GO	LAM1: Cluster2
GO:1903076	GO:regulation of protein localization to plasma membrane	6/190	95/18670	0.000421196	0.00645834	0.00482211	LGALS3/TREM2/RER1/CIB1/VTI1B/VAMP8	6	GO	LAM1: Cluster2
GO:0052548	GO:regulation of endopeptidase activity	13/190	425/18670	0.000427459	0.00649024	0.00484594	CTSD/CSTB/PYCARD/IFI6/S100A9/CST3/SERPINA1/CSTA/SERPING1/GPX1/PPARG/LGALS9/BCAP31	13	GO	LAM1: Cluster2
GO:0006000	GO:fructose metabolic process	3/190	15/18670	0.000431339	0.00649024	0.00484594	FBP1/AKR1B1/ALDOA	3	GO	LAM1: Cluster2
GO:0030730	GO:sequestering of triglyceride	3/190	15/18670	0.000431339	0.00649024	0.00484594	LPL/ABHD5/PPARG	3	GO	LAM1: Cluster2
GO:0090197	GO:positive regulation of chemokine secretion	3/190	15/18670	0.000431339	0.00649024	0.00484594	LPL/AIF1/PYCARD	3	GO	LAM1: Cluster2
GO:0002218	GO:activation of innate immune response	11/190	319/18670	0.000440862	0.00660267	0.00492988	MARCO/FCER1G/COLEC12/PYCARD/S100A9/CTSB/CYBA/MNDA/UBB/CTSL/PSMA7	11	GO	LAM1: Cluster2
GO:0008585	GO:female gonad development	6/190	96/18670	0.000445529	0.00664167	0.004959	INHBA/CEBPB/UBB/FOXO3/NUPR1/RETN	6	GO	LAM1: Cluster2
GO:0032371	GO:regulation of sterol transport	5/190	63/18670	0.000451238	0.00666507	0.00497647	APOC1/TSPO/APOE/LAMTOR1/PPARG	5	GO	LAM1: Cluster2
GO:0032374	GO:regulation of cholesterol transport	5/190	63/18670	0.000451238	0.00666507	0.00497647	APOC1/TSPO/APOE/LAMTOR1/PPARG	5	GO	LAM1: Cluster2
GO:0010324	GO:membrane invagination	7/190	135/18670	0.000468261	0.00688202	0.00513845	MARCO/FCER1G/MSR1/AIF1/TREM2/FCGR1A/PPARG	7	GO	LAM1: Cluster2
GO:0032733	GO:positive regulation of interleukin-10 production	4/190	36/18670	0.000474474	0.00688202	0.00513845	FCER1G/PYCARD/TREM2/LGALS9	4	GO	LAM1: Cluster2
GO:0033572	GO:transferrin transport	4/190	36/18670	0.000474474	0.00688202	0.00513845	ATP6V0B/ATP6V1F/ATP6V0D1/TFRC	4	GO	LAM1: Cluster2
GO:0042554	GO:superoxide anion generation	4/190	36/18670	0.000474474	0.00688202	0.00513845	TYROBP/ACP5/NCF2/CYBA	4	GO	LAM1: Cluster2
GO:0097191	GO:extrinsic apoptotic signaling pathway	9/190	224/18670	0.000493569	0.00712688	0.00532128	LGALS3/INHBA/PYCARD/IFI6/GPX1/CIB1/FOXO3/HMOX1/IFI27	9	GO	LAM1: Cluster2
GO:2001235	GO:positive regulation of apoptotic signaling pathway	8/190	179/18670	0.00050401	0.00724514	0.00540958	INHBA/CTSC/PYCARD/S100A9/LGALS9/UBB/NUPR1/BCAP31	8	GO	LAM1: Cluster2
GO:0032729	GO:positive regulation of interferon-gamma production	5/190	65/18670	0.000521649	0.00744149	0.00555618	HLA-DPA1/HLA-DPB1/PYCARD/SLC11A1/LGALS9	5	GO	LAM1: Cluster2
GO:1901570	GO:fatty acid derivative biosynthetic process	6/190	99/18670	0.000525155	0.00744149	0.00555618	CD74/ALOX5AP/LTA4H/ALOX5/MGST3/FABP5	6	GO	LAM1: Cluster2
GO:0010885	GO:regulation of cholesterol storage	3/190	16/18670	0.000526913	0.00744149	0.00555618	LPL/MSR1/PPARG	3	GO	LAM1: Cluster2
GO:0051238	GO:sequestering of metal ion	3/190	16/18670	0.000526913	0.00744149	0.00555618	FTL/FTH1/S100A9	3	GO	LAM1: Cluster2
GO:0043270	GO:positive regulation of ion transport	10/190	275/18670	0.000531124	0.00746821	0.00557613	TSPO/LGALS3/APOE/TREM2/GLRX/GSTO1/CEBPB/TMSB4X/G6PD/VAMP8	10	GO	LAM1: Cluster2
GO:0002285	GO:lymphocyte activation involved in immune response	8/190	181/18670	0.000542443	0.00752874	0.00562133	LGALS3/FCER1G/HLA-DMB/SLC11A1/LGALS9/LAMP1/TFRC/SPN	8	GO	LAM1: Cluster2
GO:0010565	GO:regulation of cellular ketone metabolic process	8/190	181/18670	0.000542443	0.00752874	0.00562133	APOC1/COMT/CD74/OAZ1/PPARG/FABP5/SLC7A7/PSMA7	8	GO	LAM1: Cluster2
GO:0022408	GO:negative regulation of cell-cell adhesion	8/190	181/18670	0.000542443	0.00752874	0.00562133	LGALS3/VSIG4/CD74/GPNMB/CEBPB/LGALS9/RGCC/SPN	8	GO	LAM1: Cluster2
GO:0045089	GO:positive regulation of innate immune response	12/190	381/18670	0.00054886	0.0075851	0.00566341	MARCO/FCER1G/COLEC12/PYCARD/S100A9/CTSB/CYBA/MNDA/UBB/LAMP1/CTSL/PSMA7	12	GO	LAM1: Cluster2
GO:0032649	GO:regulation of interferon-gamma production	6/190	101/18670	0.000584101	0.00795114	0.00593671	HLA-DPA1/INHBA/HLA-DPB1/PYCARD/SLC11A1/LGALS9	6	GO	LAM1: Cluster2
GO:0046545	GO:development of primary female sexual characteristics	6/190	101/18670	0.000584101	0.00795114	0.00593671	INHBA/CEBPB/UBB/FOXO3/NUPR1/RETN	6	GO	LAM1: Cluster2
GO:0015682	GO:ferric iron transport	4/190	38/18670	0.000585223	0.00795114	0.00593671	ATP6V0B/ATP6V1F/ATP6V0D1/TFRC	4	GO	LAM1: Cluster2
GO:0072512	GO:trivalent inorganic cation transport	4/190	38/18670	0.000585223	0.00795114	0.00593671	ATP6V0B/ATP6V1F/ATP6V0D1/TFRC	4	GO	LAM1: Cluster2
GO:0008202	GO:steroid metabolic process	11/190	331/18670	0.000599606	0.00811232	0.00605705	APOC1/TSPO/COMT/APOE/CYP27A1/FDX1/AKR1B1/CES1/LAMTOR1/G6PD/LIPA	11	GO	LAM1: Cluster2
GO:0034433	GO:steroid esterification	3/190	17/18670	0.000635045	0.00848483	0.00633519	APOC1/APOE/LAMTOR1	3	GO	LAM1: Cluster2
GO:0034434	GO:sterol esterification	3/190	17/18670	0.000635045	0.00848483	0.00633519	APOC1/APOE/LAMTOR1	3	GO	LAM1: Cluster2
GO:0034435	GO:cholesterol esterification	3/190	17/18670	0.000635045	0.00848483	0.00633519	APOC1/APOE/LAMTOR1	3	GO	LAM1: Cluster2
GO:0051251	GO:positive regulation of lymphocyte activation	11/190	334/18670	0.000645996	0.00859549	0.00641782	TYROBP/HLA-DPA1/HLA-DPB1/CD74/HLA-DMB/AIF1/PYCARD/LGALS9/LAMP1/TFRC/MAP3K8	11	GO	LAM1: Cluster2
GO:0022900	GO:electron transport chain	8/190	186/18670	0.000648992	0.00859981	0.00642105	ALDH2/FDX1/AKR1B1/GLRX/GPD1/NCF2/CYBA/NDUFS5	8	GO	LAM1: Cluster2
GO:0015909	GO:long-chain fatty acid transport	5/190	69/18670	0.000686892	0.00906472	0.00676817	FABP4/APOE/PPARG/NMB/PLIN2	5	GO	LAM1: Cluster2
GO:0032720	GO:negative regulation of tumor necrosis factor production	5/190	70/18670	0.0007337	0.00964292	0.00719988	TSPO/ACP5/TREM2/GPNMB/LGALS9	5	GO	LAM1: Cluster2
GO:0002286	GO:T cell activation involved in immune response	6/190	106/18670	0.000754025	0.00970318	0.00724487	LGALS3/FCER1G/HLA-DMB/SLC11A1/LGALS9/SPN	6	GO	LAM1: Cluster2
GO:0010878	GO:cholesterol storage	3/190	18/18670	0.000756366	0.00970318	0.00724487	LPL/MSR1/PPARG	3	GO	LAM1: Cluster2
GO:0034375	GO:high-density lipoprotein particle remodeling	3/190	18/18670	0.000756366	0.00970318	0.00724487	APOC1/LPL/APOE	3	GO	LAM1: Cluster2
GO:0090196	GO:regulation of chemokine secretion	3/190	18/18670	0.000756366	0.00970318	0.00724487	LPL/AIF1/PYCARD	3	GO	LAM1: Cluster2
GO:0150078	GO:positive regulation of neuroinflammatory response	3/190	18/18670	0.000756366	0.00970318	0.00724487	CTSC/TREM2/NUPR1	3	GO	LAM1: Cluster2
GO:1900221	GO:regulation of amyloid-beta clearance	3/190	18/18670	0.000756366	0.00970318	0.00724487	APOE/TREM2/LRPAP1	3	GO	LAM1: Cluster2
GO:0002262	GO:myeloid cell homeostasis	7/190	147/18670	0.000777676	0.00991099	0.00740004	FCER1G/INHBA/SPI1/G6PD/FOXO3/HMOX1/DNASE2	7	GO	LAM1: Cluster2
GO:0150077	GO:regulation of neuroinflammatory response	4/190	41/18670	0.000784044	0.00991099	0.00740004	GRN/CTSC/TREM2/NUPR1	4	GO	LAM1: Cluster2
GO:0031348	GO:negative regulation of defense response	9/190	239/18670	0.000784877	0.00991099	0.00740004	GRN/ACP5/VSIG4/APOE/PYCARD/SERPING1/GPX1/PPARG/LGALS9	9	GO	LAM1: Cluster2
GO:0051402	GO:neuron apoptotic process	9/190	239/18670	0.000784877	0.00991099	0.00740004	GRN/TYROBP/APOE/CTSZ/CEBPB/G6PD/FOXO3/NUPR1/HMOX1	9	GO	LAM1: Cluster2
GO:0010632	GO:regulation of epithelial cell migration	10/190	291/18670	0.000820893	0.0103253	0.00770937	GRN/APOE/PPARG/TMSB4X/CIB1/RGCC/HMOX1/GLUL/GLIPR2/PFN1	10	GO	LAM1: Cluster2
GO:0002532	GO:production of molecular mediator involved in inflammatory response	5/190	72/18670	0.00083442	0.0104141	0.00777567	GRN/FCER1G/ALOX5/PYCARD/VAMP8	5	GO	LAM1: Cluster2
GO:1903556	GO:negative regulation of tumor necrosis factor superfamily cytokine production	5/190	72/18670	0.00083442	0.0104141	0.00777567	TSPO/ACP5/TREM2/GPNMB/LGALS9	5	GO	LAM1: Cluster2
GO:0097028	GO:dendritic cell differentiation	4/190	42/18670	0.000859744	0.0106887	0.00798072	SPI1/TREM2/CEBPB/LGALS9	4	GO	LAM1: Cluster2
GO:2000377	GO:regulation of reactive oxygen species metabolic process	8/190	195/18670	0.000883022	0.0109359	0.00816527	TSPO/TYROBP/ACP5/HP/AIF1/CYBA/G6PD/FOXO3	8	GO	LAM1: Cluster2
GO:0006732	GO:coenzyme metabolic process	12/190	403/18670	0.000896007	0.0110542	0.0082536	FBP1/TKT/ACOT2/GPD1/GSTO1/TALDO1/G6PD/ALDOA/NUPR1/PGD/PDXK/MPC1	12	GO	LAM1: Cluster2
GO:0002685	GO:regulation of leukocyte migration	8/190	196/18670	0.000912736	0.0112176	0.00837561	LGALS3/CD74/AIF1/PYCARD/TREM2/LGALS9/SPN/HMOX1	8	GO	LAM1: Cluster2
GO:0010952	GO:positive regulation of peptidase activity	8/190	197/18670	0.000943246	0.0115274	0.00860691	GRN/CTSD/PCOLCE2/PYCARD/S100A9/PPARG/LGALS9/BCAP31	8	GO	LAM1: Cluster2
GO:0006081	GO:cellular aldehyde metabolic process	5/190	74/18670	0.000945102	0.0115274	0.00860691	TKT/TALDO1/G6PD/PGD/PDXK	5	GO	LAM1: Cluster2
GO:0010631	GO:epithelial cell migration	11/190	351/18670	0.000969078	0.0117752	0.00879195	GRN/APOE/GPX1/PPARG/TMSB4X/CIB1/RGCC/HMOX1/GLUL/GLIPR2/PFN1	11	GO	LAM1: Cluster2
GO:0062013	GO:positive regulation of small molecule metabolic process	7/190	153/18670	0.000983594	0.0119067	0.00889011	COMT/CD74/TREM2/GPD1/PPARG/TMSB4X/NUPR1	7	GO	LAM1: Cluster2
GO:0002479	GO:antigen processing and presentation of exogenous peptide antigen via MHC class I, TAP-dependent	5/190	75/18670	0.00100437	0.0121126	0.00904385	FCGR1A/NCF2/CYBA/PSMA7/VAMP8	5	GO	LAM1: Cluster2
GO:0090132	GO:epithelium migration	11/190	354/18670	0.00103804	0.0124147	0.00926942	GRN/APOE/GPX1/PPARG/TMSB4X/CIB1/RGCC/HMOX1/GLUL/GLIPR2/PFN1	11	GO	LAM1: Cluster2
GO:0090195	GO:chemokine secretion	3/190	20/18670	0.00104098	0.0124147	0.00926942	LPL/AIF1/PYCARD	3	GO	LAM1: Cluster2
GO:1903978	GO:regulation of microglial cell activation	3/190	20/18670	0.00104098	0.0124147	0.00926942	GRN/CTSC/TREM2	3	GO	LAM1: Cluster2
GO:0042035	GO:regulation of cytokine biosynthetic process	6/190	114/18670	0.00110259	0.0131008	0.00978172	TYROBP/INHBA/CD74/CEBPB/SPN/HMOX1	6	GO	LAM1: Cluster2
GO:0042771	GO:intrinsic apoptotic signaling pathway in response to DNA damage by p53 class mediator	4/190	45/18670	0.00111761	0.0132305	0.00987856	CD74/PHLDA3/PYCARD/NUPR1	4	GO	LAM1: Cluster2
GO:0032963	GO:collagen metabolic process	6/190	115/18670	0.00115361	0.013557	0.0101223	CTSD/CST3/CTSB/PPARG/RGCC/CTSL	6	GO	LAM1: Cluster2
GO:1904375	GO:regulation of protein localization to cell periphery	6/190	115/18670	0.00115361	0.013557	0.0101223	LGALS3/TREM2/RER1/CIB1/VTI1B/VAMP8	6	GO	LAM1: Cluster2
GO:0090130	GO:tissue migration	11/190	360/18670	0.00118817	0.0139124	0.0103877	GRN/APOE/GPX1/PPARG/TMSB4X/CIB1/RGCC/HMOX1/GLUL/GLIPR2/PFN1	11	GO	LAM1: Cluster2
GO:0072332	GO:intrinsic apoptotic signaling pathway by p53 class mediator	5/190	78/18670	0.00119876	0.0139855	0.0104423	CD74/PHLDA3/PYCARD/UBB/NUPR1	5	GO	LAM1: Cluster2
GO:0007035	GO:vacuolar acidification	3/190	21/18670	0.00120543	0.0140126	0.0104625	GRN/SLC11A1/ATP6V0D1	3	GO	LAM1: Cluster2
GO:0010883	GO:regulation of lipid storage	4/190	46/18670	0.00121441	0.0140209	0.0104687	LPL/MSR1/ABHD5/PPARG	4	GO	LAM1: Cluster2
GO:0002460	GO:adaptive immune response based on somatic recombination of immune receptors built from immunoglobulin superfamily domains	11/190	361/18670	0.00121485	0.0140209	0.0104687	C1QB/C1QA/C1QC/FCER1G/CD74/CTSC/HLA-DQB1/SERPING1/SLC11A1/TFRC/SPN	11	GO	LAM1: Cluster2
GO:0002673	GO:regulation of acute inflammatory response	7/190	159/18670	0.00123021	0.0141474	0.0105632	C1QB/C1QA/C1QC/FCER1G/VSIG4/SERPING1/PPARG	7	GO	LAM1: Cluster2
GO:0022409	GO:positive regulation of cell-cell adhesion	9/190	255/18670	0.00123655	0.0141697	0.0105798	HLA-DPA1/HLA-DPB1/CD74/HLA-DMB/AIF1/PYCARD/LGALS9/TFRC/MAP3K8	9	GO	LAM1: Cluster2
GO:0009895	GO:negative regulation of catabolic process	10/190	308/18670	0.00126016	0.0143485	0.0107133	APOC1/FBP1/TSPO/HP/CST3/TREM2/SLC11A1/NUPR1/HMOX1/YBX1	10	GO	LAM1: Cluster2
GO:0002761	GO:regulation of myeloid leukocyte differentiation	6/190	117/18670	0.00126106	0.0143485	0.0107133	C1QC/TYROBP/INHBA/CD74/TREM2/CEBPB	6	GO	LAM1: Cluster2
GO:0070555	GO:response to interleukin-1	8/190	207/18670	0.00129566	0.0146903	0.0109685	PYCARD/CEBPB/CYBA/LGALS9/UBB/HNMT/MAP3K8/PSMA7	8	GO	LAM1: Cluster2
GO:0006953	GO:acute-phase response	4/190	47/18670	0.00131693	0.0147754	0.011032	HP/SERPINA1/CEBPB/CD163	4	GO	LAM1: Cluster2
GO:0030574	GO:collagen catabolic process	4/190	47/18670	0.00131693	0.0147754	0.011032	CTSD/CST3/CTSB/CTSL	4	GO	LAM1: Cluster2
GO:1903580	GO:positive regulation of ATP metabolic process	4/190	47/18670	0.00131693	0.0147754	0.011032	TREM2/GPD1/TMSB4X/NUPR1	4	GO	LAM1: Cluster2
GO:0032928	GO:regulation of superoxide anion generation	3/190	22/18670	0.00138536	0.0153823	0.0114852	TYROBP/ACP5/CYBA	3	GO	LAM1: Cluster2
GO:0051195	GO:negative regulation of cofactor metabolic process	3/190	22/18670	0.00138536	0.0153823	0.0114852	FBP1/HP/NUPR1	3	GO	LAM1: Cluster2
GO:0071404	GO:cellular response to low-density lipoprotein particle stimulus	3/190	22/18670	0.00138536	0.0153823	0.0114852	LPL/FCER1G/PPARG	3	GO	LAM1: Cluster2
GO:0072604	GO:interleukin-6 secretion	4/190	48/18670	0.00142535	0.0157719	0.0117761	LPL/AIF1/PYCARD/LGALS9	4	GO	LAM1: Cluster2
GO:0002698	GO:negative regulation of immune effector process	6/190	120/18670	0.0014364	0.0158397	0.0118267	GRN/LGALS3/VSIG4/SERPING1/LGALS9/HMOX1	6	GO	LAM1: Cluster2
GO:0015850	GO:organic hydroxy compound transport	9/190	262/18670	0.00149101	0.0163858	0.0122345	APOC1/TSPO/FCER1G/APOE/MSR1/CES1/LAMTOR1/PPARG/RBP4	9	GO	LAM1: Cluster2
GO:0046718	GO:viral entry into host cell	6/190	121/18670	0.00149879	0.0164153	0.0122565	CD74/CTSB/LGALS9/LAMP1/TFRC/VAMP8	6	GO	LAM1: Cluster2
GO:0050851	GO:antigen receptor-mediated signaling pathway	10/190	316/18670	0.00152487	0.0166443	0.0124275	HLA-DPA1/HLA-DRB5/LGALS3/HLA-DRB1/HLA-DPB1/HLA-DQA1/HLA-DRA/HLA-DQB1/MNDA/PSMA7	10	GO	LAM1: Cluster2
GO:0034101	GO:erythrocyte homeostasis	6/190	122/18670	0.00156322	0.0168912	0.0126118	INHBA/SPI1/G6PD/FOXO3/HMOX1/DNASE2	6	GO	LAM1: Cluster2
GO:1903409	GO:reactive oxygen species biosynthetic process	6/190	122/18670	0.00156322	0.0168912	0.0126118	TSPO/GCHFR/ACP5/AIF1/CYBA/FOXO3	6	GO	LAM1: Cluster2
GO:1903578	GO:regulation of ATP metabolic process	6/190	122/18670	0.00156322	0.0168912	0.0126118	FBP1/TSPO/TREM2/GPD1/TMSB4X/NUPR1	6	GO	LAM1: Cluster2
GO:0016125	GO:sterol metabolic process	7/190	166/18670	0.0015765	0.0169163	0.0126305	APOC1/APOE/CYP27A1/FDX1/CES1/G6PD/LIPA	7	GO	LAM1: Cluster2
GO:0032753	GO:positive regulation of interleukin-4 production	3/190	23/18670	0.0015813	0.0169163	0.0126305	FCER1G/CEBPB/LGALS9	3	GO	LAM1: Cluster2
GO:0051004	GO:regulation of lipoprotein lipase activity	3/190	23/18670	0.0015813	0.0169163	0.0126305	APOC1/LPL/ABHD5	3	GO	LAM1: Cluster2
GO:0042089	GO:cytokine biosynthetic process	6/190	123/18670	0.00162974	0.0173767	0.0129743	TYROBP/INHBA/CD74/CEBPB/SPN/HMOX1	6	GO	LAM1: Cluster2
GO:0043281	GO:regulation of cysteine-type endopeptidase activity involved in apoptotic process	8/190	215/18670	0.00164712	0.0175041	0.0130694	CTSD/PYCARD/IFI6/S100A9/GPX1/PPARG/LGALS9/BCAP31	8	GO	LAM1: Cluster2
GO:0050886	GO:endocrine process	5/190	84/18670	0.00166923	0.0176227	0.013158	INHBA/CTSZ/CES1/CYBA/RETN	5	GO	LAM1: Cluster2
GO:0051453	GO:regulation of intracellular pH	5/190	84/18670	0.00166923	0.0176227	0.013158	GRN/ATP6V0B/ATP6V1F/SLC11A1/ATP6V0D1	5	GO	LAM1: Cluster2
GO:0001906	GO:cell killing	7/190	168/18670	0.00168819	0.0177646	0.0132639	TYROBP/CTSC/LYZ/LGALS9/HMGN2/LAMP1/STXBP2	7	GO	LAM1: Cluster2
GO:0042107	GO:cytokine metabolic process	6/190	124/18670	0.00169839	0.0178137	0.0133006	TYROBP/INHBA/CD74/CEBPB/SPN/HMOX1	6	GO	LAM1: Cluster2
GO:0031668	GO:cellular response to extracellular stimulus	9/190	268/18670	0.00174122	0.0182037	0.0135918	LPL/COMT/CD68/AIF1/PPARG/CYBA/UPP1/HMOX1/GLUL	9	GO	LAM1: Cluster2
GO:0060249	GO:anatomical structure homeostasis	12/190	437/18670	0.00178053	0.0185544	0.0138537	ACP5/LYZ/TULP1/AKR1B1/POLD4/GAA/NOP10/SNX10/TFRC/LIPA/RBP4/ALDOA	12	GO	LAM1: Cluster2
GO:0043302	GO:positive regulation of leukocyte degranulation	3/190	24/18670	0.00179375	0.0186043	0.0138909	FCER1G/LAMP1/VAMP8	3	GO	LAM1: Cluster2
GO:0016064	GO:immunoglobulin mediated immune response	8/190	218/18670	0.00179687	0.0186043	0.0138909	C1QB/C1QA/C1QC/FCER1G/CD74/HLA-DQB1/SERPING1/TFRC	8	GO	LAM1: Cluster2
GO:0032368	GO:regulation of lipid transport	6/190	127/18670	0.00191757	0.0197903	0.0147764	APOC1/TSPO/APOE/LAMTOR1/PPARG/RETN	6	GO	LAM1: Cluster2
GO:0019724	GO:B cell mediated immunity	8/190	221/18670	0.00195719	0.0201091	0.0150144	C1QB/C1QA/C1QC/FCER1G/CD74/HLA-DQB1/SERPING1/TFRC	8	GO	LAM1: Cluster2
GO:0010506	GO:regulation of autophagy	10/190	327/18670	0.00196095	0.0201091	0.0150144	TSPO/ATP6V0B/PYCARD/TREM2/LAMTOR1/ATP6V0D1/PSAP/FOXO3/NUPR1/HMOX1	10	GO	LAM1: Cluster2
GO:0043542	GO:endothelial cell migration	9/190	273/18670	0.00197452	0.0201839	0.0150703	GRN/APOE/GPX1/PPARG/TMSB4X/CIB1/RGCC/HMOX1/GLUL	9	GO	LAM1: Cluster2
GO:2000482	GO:regulation of interleukin-8 secretion	3/190	25/18670	0.00202319	0.0206161	0.015393	PYCARD/LGALS9/TMSB4X	3	GO	LAM1: Cluster2
GO:0032496	GO:response to lipopolysaccharide	10/190	330/18670	0.0020959	0.0212896	0.0158958	TSPO/COMT/CD68/ACP5/PYCARD/TREM2/SLC11A1/CEBPB/LGALS9/CXCL3	10	GO	LAM1: Cluster2
GO:0006956	GO:complement activation	7/190	175/18670	0.0021283	0.0214859	0.0160425	C1QB/C1QA/C1QC/VSIG4/SERPING1/RGCC/CFD	7	GO	LAM1: Cluster2
GO:0030595	GO:leukocyte chemotaxis	8/190	224/18670	0.00212858	0.0214859	0.0160425	LGALS3/CXCL16/FCER1G/CD74/AIF1/S100A9/LGALS9/CXCL3	8	GO	LAM1: Cluster2
GO:0097306	GO:cellular response to alcohol	5/190	89/18670	0.00215466	0.0216813	0.0161883	INHBA/SPI1/FDX1/PPARG/FOXO3	5	GO	LAM1: Cluster2
GO:0006636	GO:unsaturated fatty acid biosynthetic process	4/190	54/18670	0.00220952	0.022164	0.0165487	CD74/ALOX5AP/ALOX5/FABP5	4	GO	LAM1: Cluster2
GO:0046887	GO:positive regulation of hormone secretion	6/190	131/18670	0.00224234	0.0224223	0.0167416	INHBA/NMB/RBP4/GLUL/RETN/VAMP8	6	GO	LAM1: Cluster2
GO:0030641	GO:regulation of cellular pH	5/190	90/18670	0.0022629	0.0224223	0.0167416	GRN/ATP6V0B/ATP6V1F/SLC11A1/ATP6V0D1	5	GO	LAM1: Cluster2
GO:0003081	GO:regulation of systemic arterial blood pressure by renin-angiotensin	3/190	26/18670	0.00227008	0.0224223	0.0167416	CTSZ/CES1/CYBA	3	GO	LAM1: Cluster2
GO:0006700	GO:C21-steroid hormone biosynthetic process	3/190	26/18670	0.00227008	0.0224223	0.0167416	TSPO/FDX1/AKR1B1	3	GO	LAM1: Cluster2
GO:1903579	GO:negative regulation of ATP metabolic process	3/190	26/18670	0.00227008	0.0224223	0.0167416	FBP1/TSPO/NUPR1	3	GO	LAM1: Cluster2
GO:0001894	GO:tissue homeostasis	8/190	227/18670	0.00231157	0.0227622	0.0169954	ACP5/LYZ/TULP1/AKR1B1/SNX10/TFRC/LIPA/RBP4	8	GO	LAM1: Cluster2
GO:0043280	GO:positive regulation of cysteine-type endopeptidase activity involved in apoptotic process	6/190	132/18670	0.00232965	0.0228703	0.0170761	CTSD/PYCARD/S100A9/PPARG/LGALS9/BCAP31	6	GO	LAM1: Cluster2
GO:0045639	GO:positive regulation of myeloid cell differentiation	5/190	91/18670	0.00237504	0.0232451	0.0173559	TYROBP/INHBA/CD74/TREM2/FOXO3	5	GO	LAM1: Cluster2
GO:0010594	GO:regulation of endothelial cell migration	8/190	229/18670	0.00244027	0.0238111	0.0177786	GRN/APOE/PPARG/TMSB4X/CIB1/RGCC/HMOX1/GLUL	8	GO	LAM1: Cluster2
GO:0019319	GO:hexose biosynthetic process	5/190	92/18670	0.00249117	0.0239362	0.017872	FBP1/AKR1B1/GPD1/RBP4/ALDOA	5	GO	LAM1: Cluster2
GO:0043534	GO:blood vessel endothelial cell migration	7/190	180/18670	0.00249347	0.0239362	0.017872	APOE/GPX1/PPARG/TMSB4X/CIB1/RGCC/HMOX1	7	GO	LAM1: Cluster2
GO:0030260	GO:entry into host cell	6/190	134/18670	0.00251191	0.0239362	0.017872	CD74/CTSB/LGALS9/LAMP1/TFRC/VAMP8	6	GO	LAM1: Cluster2
GO:0044409	GO:entry into host	6/190	134/18670	0.00251191	0.0239362	0.017872	CD74/CTSB/LGALS9/LAMP1/TFRC/VAMP8	6	GO	LAM1: Cluster2
GO:0051806	GO:entry into cell of other organism involved in symbiotic interaction	6/190	134/18670	0.00251191	0.0239362	0.017872	CD74/CTSB/LGALS9/LAMP1/TFRC/VAMP8	6	GO	LAM1: Cluster2
GO:0051828	GO:entry into other organism involved in symbiotic interaction	6/190	134/18670	0.00251191	0.0239362	0.017872	CD74/CTSB/LGALS9/LAMP1/TFRC/VAMP8	6	GO	LAM1: Cluster2
GO:0006749	GO:glutathione metabolic process	4/190	56/18670	0.00252599	0.0239362	0.017872	ETHE1/GPX1/G6PD/GPX4	4	GO	LAM1: Cluster2
GO:1903078	GO:positive regulation of protein localization to plasma membrane	4/190	56/18670	0.00252599	0.0239362	0.017872	LGALS3/TREM2/RER1/CIB1	4	GO	LAM1: Cluster2
GO:0032673	GO:regulation of interleukin-4 production	3/190	27/18670	0.00253486	0.0239362	0.017872	FCER1G/CEBPB/LGALS9	3	GO	LAM1: Cluster2
GO:0035902	GO:response to immobilization stress	3/190	27/18670	0.00253486	0.0239362	0.017872	PPARG/HNMT/FOXO3	3	GO	LAM1: Cluster2
GO:0048143	GO:astrocyte activation	3/190	27/18670	0.00253486	0.0239362	0.017872	C1QA/GRN/TREM2	3	GO	LAM1: Cluster2
GO:0042445	GO:hormone metabolic process	8/190	232/18670	0.00264379	0.0248918	0.0185855	TSPO/COMT/CYP27A1/FDX1/AKR1B1/CTSZ/CES1/RBP4	8	GO	LAM1: Cluster2
GO:0045981	GO:positive regulation of nucleotide metabolic process	4/190	57/18670	0.00269532	0.0252294	0.0188375	TREM2/GPD1/TMSB4X/NUPR1	4	GO	LAM1: Cluster2
GO:1900544	GO:positive regulation of purine nucleotide metabolic process	4/190	57/18670	0.00269532	0.0252294	0.0188375	TREM2/GPD1/TMSB4X/NUPR1	4	GO	LAM1: Cluster2
GO:0097305	GO:response to alcohol	8/190	233/18670	0.0027145	0.0253354	0.0189166	INHBA/SPI1/FDX1/PPARG/CYBA/G6PD/FOXO3/RBP4	8	GO	LAM1: Cluster2
GO:0002237	GO:response to molecule of bacterial origin	10/190	343/18670	0.00276995	0.0257781	0.0192472	TSPO/COMT/CD68/ACP5/PYCARD/TREM2/SLC11A1/CEBPB/LGALS9/CXCL3	10	GO	LAM1: Cluster2
GO:0034368	GO:protein-lipid complex remodeling	3/190	28/18670	0.00281796	0.0258514	0.0193019	APOC1/LPL/APOE	3	GO	LAM1: Cluster2
GO:0034369	GO:plasma lipoprotein particle remodeling	3/190	28/18670	0.00281796	0.0258514	0.0193019	APOC1/LPL/APOE	3	GO	LAM1: Cluster2
GO:0045408	GO:regulation of interleukin-6 biosynthetic process	3/190	28/18670	0.00281796	0.0258514	0.0193019	TYROBP/CD74/CEBPB	3	GO	LAM1: Cluster2
GO:0090383	GO:phagosome acidification	3/190	28/18670	0.00281796	0.0258514	0.0193019	ATP6V0B/ATP6V1F/ATP6V0D1	3	GO	LAM1: Cluster2
GO:1900543	GO:negative regulation of purine nucleotide metabolic process	3/190	28/18670	0.00281796	0.0258514	0.0193019	FBP1/TSPO/NUPR1	3	GO	LAM1: Cluster2
GO:2001169	GO:regulation of ATP biosynthetic process	5/190	96/18670	0.00299721	0.0274176	0.0204713	FBP1/TREM2/GPD1/TMSB4X/NUPR1	5	GO	LAM1: Cluster2
GO:0031669	GO:cellular response to nutrient levels	8/190	237/18670	0.00301227	0.0274773	0.0205159	LPL/COMT/CD68/PPARG/CYBA/UPP1/HMOX1/GLUL	8	GO	LAM1: Cluster2
GO:0034367	GO:protein-containing complex remodeling	3/190	29/18670	0.00311977	0.0281391	0.0210101	APOC1/LPL/APOE	3	GO	LAM1: Cluster2
GO:0042226	GO:interleukin-6 biosynthetic process	3/190	29/18670	0.00311977	0.0281391	0.0210101	TYROBP/CD74/CEBPB	3	GO	LAM1: Cluster2
GO:0045980	GO:negative regulation of nucleotide metabolic process	3/190	29/18670	0.00311977	0.0281391	0.0210101	FBP1/TSPO/NUPR1	3	GO	LAM1: Cluster2
GO:0072606	GO:interleukin-8 secretion	3/190	29/18670	0.00311977	0.0281391	0.0210101	PYCARD/LGALS9/TMSB4X	3	GO	LAM1: Cluster2
GO:0015908	GO:fatty acid transport	5/190	97/18670	0.0031345	0.028193	0.0210503	FABP4/APOE/PPARG/NMB/PLIN2	5	GO	LAM1: Cluster2
GO:2000116	GO:regulation of cysteine-type endopeptidase activity	8/190	239/18670	0.00317039	0.0284068	0.0212099	CTSD/PYCARD/IFI6/S100A9/GPX1/PPARG/LGALS9/BCAP31	8	GO	LAM1: Cluster2
GO:0043902	GO:positive regulation of multi-organism process	7/190	188/18670	0.00317592	0.0284068	0.0212099	GRN/INHBA/CD74/APOE/CYBA/LGALS9/CIB1	7	GO	LAM1: Cluster2
GO:0051260	GO:protein homooligomerization	10/190	351/18670	0.00326438	0.0291172	0.0217403	FBP1/FCER1G/APOE/ALOX5AP/COLEC12/PYCARD/DECR1/ALDOA/HMOX1/GLUL	10	GO	LAM1: Cluster2
GO:0006885	GO:regulation of pH	5/190	98/18670	0.00327628	0.0291426	0.0217593	GRN/ATP6V0B/ATP6V1F/SLC11A1/ATP6V0D1	5	GO	LAM1: Cluster2
GO:1900542	GO:regulation of purine nucleotide metabolic process	6/190	142/18670	0.00334991	0.0297154	0.022187	FBP1/TSPO/TREM2/GPD1/TMSB4X/NUPR1	6	GO	LAM1: Cluster2
GO:0010743	GO:regulation of macrophage derived foam cell differentiation	3/190	30/18670	0.00344069	0.0298672	0.0223004	LPL/MSR1/PPARG	3	GO	LAM1: Cluster2
GO:0042759	GO:long-chain fatty acid biosynthetic process	3/190	30/18670	0.00344069	0.0298672	0.0223004	LTA4H/ALOX5/GPX4	3	GO	LAM1: Cluster2
GO:0048147	GO:negative regulation of fibroblast proliferation	3/190	30/18670	0.00344069	0.0298672	0.0223004	FTH1/PPARG/NUPR1	3	GO	LAM1: Cluster2
GO:0050869	GO:negative regulation of B cell activation	3/190	30/18670	0.00344069	0.0298672	0.0223004	TYROBP/INHBA/MNDA	3	GO	LAM1: Cluster2
GO:0061082	GO:myeloid leukocyte cytokine production	3/190	30/18670	0.00344069	0.0298672	0.0223004	FCER1G/CD74/HMOX1	3	GO	LAM1: Cluster2
GO:0007040	GO:lysosome organization	4/190	61/18670	0.0034505	0.0298672	0.0223004	GRN/LAMTOR1/GAA/HEXB	4	GO	LAM1: Cluster2
GO:0030888	GO:regulation of B cell proliferation	4/190	61/18670	0.0034505	0.0298672	0.0223004	TYROBP/CD74/MNDA/TFRC	4	GO	LAM1: Cluster2
GO:0080171	GO:lytic vacuole organization	4/190	61/18670	0.0034505	0.0298672	0.0223004	GRN/LAMTOR1/GAA/HEXB	4	GO	LAM1: Cluster2
GO:2001244	GO:positive regulation of intrinsic apoptotic signaling pathway	4/190	61/18670	0.0034505	0.0298672	0.0223004	S100A9/UBB/NUPR1/BCAP31	4	GO	LAM1: Cluster2
GO:1903706	GO:regulation of hemopoiesis	12/190	475/18670	0.00351493	0.0303199	0.0226383	C1QC/TYROBP/LGALS3/INHBA/CD74/SPI1/TREM2/CEBPB/LGALS9/CIB1/FOXO3/PSMA7	12	GO	LAM1: Cluster2
GO:0046486	GO:glycerolipid metabolic process	11/190	414/18670	0.00352163	0.0303199	0.0226383	APOC1/LPL/FABP4/APOE/PTPMT1/ABHD5/PLBD1/GPX1/GPD1/PLAAT3/FABP5	11	GO	LAM1: Cluster2
GO:0002758	GO:innate immune response-activating signal transduction	9/190	298/18670	0.00354236	0.0304171	0.0227109	MARCO/FCER1G/COLEC12/S100A9/CTSB/CYBA/UBB/CTSL/PSMA7	9	GO	LAM1: Cluster2
GO:0043112	GO:receptor metabolic process	7/190	192/18670	0.00356656	0.0305434	0.0228052	FCER1G/APOE/LAMTOR1/LRPAP1/PPARG/TFRC/CD63	7	GO	LAM1: Cluster2
GO:0006521	GO:regulation of cellular amino acid metabolic process	4/190	62/18670	0.00365958	0.0312569	0.0233379	COMT/OAZ1/SLC7A7/PSMA7	4	GO	LAM1: Cluster2
GO:0046390	GO:ribose phosphate biosynthetic process	9/190	300/18670	0.003701	0.0314439	0.0234775	FBP1/TREM2/GPD1/TMSB4X/G6PD/UPP1/ALDOA/NUPR1/MPC1	9	GO	LAM1: Cluster2
GO:0070372	GO:regulation of ERK1 and ERK2 cascade	9/190	300/18670	0.003701	0.0314439	0.0234775	MARCO/CD74/APOE/PYCARD/TREM2/GPNMB/LGALS9/CIB1/GLIPR2	9	GO	LAM1: Cluster2
GO:1903426	GO:regulation of reactive oxygen species biosynthetic process	5/190	101/18670	0.0037293	0.0316009	0.0235948	TSPO/ACP5/AIF1/CYBA/FOXO3	5	GO	LAM1: Cluster2
GO:0042168	GO:heme metabolic process	3/190	31/18670	0.00378108	0.0318248	0.023762	TSPO/BLVRA/HMOX1	3	GO	LAM1: Cluster2
GO:2000406	GO:positive regulation of T cell migration	3/190	31/18670	0.00378108	0.0318248	0.023762	AIF1/PYCARD/SPN	3	GO	LAM1: Cluster2
GO:0051222	GO:positive regulation of protein transport	11/190	418/18670	0.00378538	0.0318248	0.023762	LPL/AIF1/PYCARD/TREM2/OAZ1/LGALS9/CIB1/RGCC/RBP4/BCAP31/GLUL	11	GO	LAM1: Cluster2
GO:0002224	GO:toll-like receptor signaling pathway	6/190	146/18670	0.00383957	0.0321127	0.0239769	COLEC12/S100A9/CTSB/CYBA/UBB/CTSL	6	GO	LAM1: Cluster2
GO:0006140	GO:regulation of nucleotide metabolic process	6/190	146/18670	0.00383957	0.0321127	0.0239769	FBP1/TSPO/TREM2/GPD1/TMSB4X/NUPR1	6	GO	LAM1: Cluster2
GO:1904377	GO:positive regulation of protein localization to cell periphery	4/190	63/18670	0.0038771	0.0323426	0.0241486	LGALS3/TREM2/RER1/CIB1	4	GO	LAM1: Cluster2
GO:2000379	GO:positive regulation of reactive oxygen species metabolic process	5/190	102/18670	0.0038898	0.0323648	0.0241651	TSPO/TYROBP/AIF1/CYBA/FOXO3	5	GO	LAM1: Cluster2
GO:0006694	GO:steroid biosynthetic process	7/190	196/18670	0.00399279	0.033136	0.024741	TSPO/APOE/CYP27A1/FDX1/AKR1B1/CES1/G6PD	7	GO	LAM1: Cluster2
GO:0060326	GO:cell chemotaxis	9/190	304/18670	0.004035	0.0334002	0.0249383	LGALS3/CXCL16/FCER1G/CD74/AIF1/S100A9/LGALS9/TMSB4X/CXCL3	9	GO	LAM1: Cluster2
GO:0019318	GO:hexose metabolic process	8/190	249/18670	0.0040603	0.0335235	0.0250303	FBP1/AKR1B1/GPD1/GAA/G6PD/RBP4/ALDOA/FABP5	8	GO	LAM1: Cluster2
GO:0060135	GO:maternal process involved in female pregnancy	4/190	64/18670	0.0041032	0.0335496	0.0250498	BSG/AKR1B1/CTSB/LGALS9	4	GO	LAM1: Cluster2
GO:2000378	GO:negative regulation of reactive oxygen species metabolic process	4/190	64/18670	0.0041032	0.0335496	0.0250498	TSPO/ACP5/HP/G6PD	4	GO	LAM1: Cluster2
GO:0002221	GO:pattern recognition receptor signaling pathway	7/190	197/18670	0.00410514	0.0335496	0.0250498	MARCO/COLEC12/S100A9/CTSB/CYBA/UBB/CTSL	7	GO	LAM1: Cluster2
GO:0009156	GO:ribonucleoside monophosphate biosynthetic process	7/190	197/18670	0.00410514	0.0335496	0.0250498	FBP1/TREM2/GPD1/TMSB4X/UPP1/ALDOA/NUPR1	7	GO	LAM1: Cluster2
GO:0032386	GO:regulation of intracellular transport	11/190	423/18670	0.00413706	0.0337249	0.0251807	FCER1G/OAZ1/LGALS9/CIB1/LAMP1/STXBP2/NUCB1/HMOX1/IFI27/BCAP31/VAMP8	11	GO	LAM1: Cluster2
GO:0006066	GO:alcohol metabolic process	10/190	364/18670	0.00421556	0.0340158	0.0253979	APOC1/ALDH2/APOE/CYP27A1/FDX1/AKR1B1/CES1/GPD1/G6PD/RBP4	10	GO	LAM1: Cluster2
GO:0072376	GO:protein activation cascade	7/190	198/18670	0.00421987	0.0340158	0.0253979	C1QB/C1QA/C1QC/VSIG4/SERPING1/RGCC/CFD	7	GO	LAM1: Cluster2
GO:0008630	GO:intrinsic apoptotic signaling pathway in response to DNA damage	5/190	104/18670	0.00422556	0.0340158	0.0253979	CD74/PHLDA3/PYCARD/NUPR1/HMOX1	5	GO	LAM1: Cluster2
GO:0030593	GO:neutrophil chemotaxis	5/190	104/18670	0.00422556	0.0340158	0.0253979	LGALS3/FCER1G/CD74/S100A9/CXCL3	5	GO	LAM1: Cluster2
GO:0071887	GO:leukocyte apoptotic process	5/190	104/18670	0.00422556	0.0340158	0.0253979	LGALS3/FCER1G/CD74/LGALS9/CTSL	5	GO	LAM1: Cluster2
GO:2001056	GO:positive regulation of cysteine-type endopeptidase activity	6/190	149/18670	0.00424024	0.0340488	0.0254225	CTSD/PYCARD/S100A9/PPARG/LGALS9/BCAP31	6	GO	LAM1: Cluster2
GO:0016052	GO:carbohydrate catabolic process	7/190	199/18670	0.00433702	0.0345756	0.0258159	FBP1/GPD1/GAA/HEXB/ALDOA/NUPR1/PGD	7	GO	LAM1: Cluster2
GO:0051187	GO:cofactor catabolic process	4/190	65/18670	0.00433806	0.0345756	0.0258159	HP/BLVRA/GPX1/HMOX1	4	GO	LAM1: Cluster2
GO:0072678	GO:T cell migration	4/190	65/18670	0.00433806	0.0345756	0.0258159	CXCL16/AIF1/PYCARD/SPN	4	GO	LAM1: Cluster2
GO:0008203	GO:cholesterol metabolic process	6/190	150/18670	0.00438042	0.0346753	0.0258903	APOC1/APOE/CYP27A1/FDX1/CES1/G6PD	6	GO	LAM1: Cluster2
GO:0006002	GO:fructose 6-phosphate metabolic process	2/190	10/18670	0.00439364	0.0346753	0.0258903	FBP1/TALDO1	2	GO	LAM1: Cluster2
GO:0030388	GO:fructose 1,6-bisphosphate metabolic process	2/190	10/18670	0.00439364	0.0346753	0.0258903	FBP1/ALDOA	2	GO	LAM1: Cluster2
GO:1900426	GO:positive regulation of defense response to bacterium	2/190	10/18670	0.00439364	0.0346753	0.0258903	GRN/CYBA	2	GO	LAM1: Cluster2
GO:0010039	GO:response to iron ion	3/190	33/18670	0.00452167	0.0353574	0.0263996	C1QA/G6PD/HMOX1	3	GO	LAM1: Cluster2
GO:0032633	GO:interleukin-4 production	3/190	33/18670	0.00452167	0.0353574	0.0263996	FCER1G/CEBPB/LGALS9	3	GO	LAM1: Cluster2
GO:0050718	GO:positive regulation of interleukin-1 beta secretion	3/190	33/18670	0.00452167	0.0353574	0.0263996	LPL/PYCARD/LGALS9	3	GO	LAM1: Cluster2
GO:0055088	GO:lipid homeostasis	6/190	151/18670	0.004524	0.0353574	0.0263996	LPL/FABP4/APOE/ABHD5/LAMTOR1/PPARG	6	GO	LAM1: Cluster2
GO:0048193	GO:Golgi vesicle transport	10/190	368/18670	0.00454855	0.0354633	0.0264787	CTSC/SERPINA1/CTSZ/RER1/VTI1B/LAMP1/SNX2/BCAP31/CNIH4/VAMP8	10	GO	LAM1: Cluster2
GO:0002703	GO:regulation of leukocyte mediated immunity	7/190	201/18670	0.00457868	0.0356119	0.0265896	FCER1G/LGALS9/LAMP1/TFRC/STXBP2/HMOX1/VAMP8	7	GO	LAM1: Cluster2
GO:0072503	GO:cellular divalent inorganic cation homeostasis	12/190	493/18670	0.00471666	0.0365968	0.0273249	APOE/S100A9/ANXA5/SLC11A1/GRINA/GSTO1/RMDN3/CYBA/HEXB/CD52/NMB/BCAP31	12	GO	LAM1: Cluster2
GO:0048608	GO:reproductive structure development	11/190	431/18670	0.00475358	0.0366845	0.0273905	INHBA/BSG/CTSB/PPARG/CEBPB/UBB/PSAP/FOXO3/RBP4/NUPR1/RETN	11	GO	LAM1: Cluster2
GO:0001909	GO:leukocyte mediated cytotoxicity	5/190	107/18670	0.00476727	0.0366845	0.0273905	TYROBP/CTSC/LGALS9/LAMP1/STXBP2	5	GO	LAM1: Cluster2
GO:0062014	GO:negative regulation of small molecule metabolic process	5/190	107/18670	0.00476727	0.0366845	0.0273905	APOC1/FBP1/TSPO/APOE/NUPR1	5	GO	LAM1: Cluster2
GO:0034612	GO:response to tumor necrosis factor	9/190	312/18670	0.00477354	0.0366845	0.0273905	CXCL16/FABP4/PYCARD/GPD1/CYBA/TMSB4X/CIB1/FOXO3/PSMA7	9	GO	LAM1: Cluster2
GO:0042133	GO:neurotransmitter metabolic process	6/190	153/18670	0.00482152	0.0368898	0.0275438	TSPO/COMT/GCHFR/ACP5/AIF1/HNMT	6	GO	LAM1: Cluster2
GO:0042108	GO:positive regulation of cytokine biosynthetic process	4/190	67/18670	0.00483463	0.0368898	0.0275438	TYROBP/CD74/SPN/HMOX1	4	GO	LAM1: Cluster2
GO:0048662	GO:negative regulation of smooth muscle cell proliferation	4/190	67/18670	0.00483463	0.0368898	0.0275438	COMT/AIF1/PPARG/HMOX1	4	GO	LAM1: Cluster2
GO:0006790	GO:sulfur compound metabolic process	10/190	372/18670	0.00490196	0.0373152	0.0278614	ETHE1/COMT/ACOT2/GPX1/GSTO1/HEXB/G6PD/MGST3/GPX4/MPC1	10	GO	LAM1: Cluster2
GO:0006914	GO:autophagy	12/190	496/18670	0.00494563	0.037433	0.0279493	TSPO/ATP6V0B/PYCARD/S100A9/TREM2/LAMTOR1/ATP6V0D1/PSAP/FOXO3/NUPR1/HMOX1/VAMP8	12	GO	LAM1: Cluster2
GO:0061919	GO:process utilizing autophagic mechanism	12/190	496/18670	0.00494563	0.037433	0.0279493	TSPO/ATP6V0B/PYCARD/S100A9/TREM2/LAMTOR1/ATP6V0D1/PSAP/FOXO3/NUPR1/HMOX1/VAMP8	12	GO	LAM1: Cluster2
GO:0030004	GO:cellular monovalent inorganic cation homeostasis	5/190	108/18670	0.00495831	0.037433	0.0279493	GRN/ATP6V0B/ATP6V1F/SLC11A1/ATP6V0D1	5	GO	LAM1: Cluster2
GO:0006090	GO:pyruvate metabolic process	6/190	154/18670	0.00497556	0.037433	0.0279493	FBP1/BSG/GPD1/ALDOA/NUPR1/MPC1	6	GO	LAM1: Cluster2
GO:0055067	GO:monovalent inorganic cation homeostasis	6/190	154/18670	0.00497556	0.037433	0.0279493	GRN/COMT/ATP6V0B/ATP6V1F/SLC11A1/ATP6V0D1	6	GO	LAM1: Cluster2
GO:0061458	GO:reproductive system development	11/190	434/18670	0.00500277	0.0375499	0.0280366	INHBA/BSG/CTSB/PPARG/CEBPB/UBB/PSAP/FOXO3/RBP4/NUPR1/RETN	11	GO	LAM1: Cluster2
GO:0097164	GO:ammonium ion metabolic process	7/190	205/18670	0.00509236	0.0381335	0.0284724	APOC1/COMT/AKR1B1/PLBD1/PLAAT3/HNMT/FABP5	7	GO	LAM1: Cluster2
GO:1902652	GO:secondary alcohol metabolic process	6/190	155/18670	0.0051332	0.0382613	0.0285678	APOC1/APOE/CYP27A1/FDX1/CES1/G6PD	6	GO	LAM1: Cluster2
GO:2001236	GO:regulation of extrinsic apoptotic signaling pathway	6/190	155/18670	0.0051332	0.0382613	0.0285678	LGALS3/INHBA/PYCARD/IFI6/GPX1/HMOX1	6	GO	LAM1: Cluster2
GO:0031667	GO:response to nutrient levels	12/190	499/18670	0.00518342	0.0385464	0.0287807	TSPO/LPL/COMT/CD68/APOE/PPARG/CYBA/G6PD/FOXO3/UPP1/HMOX1/GLUL	12	GO	LAM1: Cluster2
GO:0072659	GO:protein localization to plasma membrane	8/190	260/18670	0.00524987	0.0388599	0.0290147	LGALS3/FCER1G/BSG/TREM2/RER1/CIB1/VTI1B/VAMP8	8	GO	LAM1: Cluster2
GO:0002791	GO:regulation of peptide secretion	12/190	500/18670	0.00526467	0.0388599	0.0290147	LPL/CD74/APOE/AIF1/PYCARD/TREM2/ANXA5/LGALS9/TMSB4X/RGCC/RBP4/GLUL	12	GO	LAM1: Cluster2
GO:0070371	GO:ERK1 and ERK2 cascade	9/190	317/18670	0.00528601	0.0388599	0.0290147	MARCO/CD74/APOE/PYCARD/TREM2/GPNMB/LGALS9/CIB1/GLIPR2	9	GO	LAM1: Cluster2
GO:0043535	GO:regulation of blood vessel endothelial cell migration	6/190	156/18670	0.00529446	0.0388599	0.0290147	APOE/PPARG/TMSB4X/CIB1/RGCC/HMOX1	6	GO	LAM1: Cluster2
GO:0002887	GO:negative regulation of myeloid leukocyte mediated immunity	2/190	11/18670	0.00533418	0.0388599	0.0290147	LGALS9/HMOX1	2	GO	LAM1: Cluster2
GO:0005984	GO:disaccharide metabolic process	2/190	11/18670	0.00533418	0.0388599	0.0290147	FBP1/GAA	2	GO	LAM1: Cluster2
GO:0070254	GO:mucus secretion	2/190	11/18670	0.00533418	0.0388599	0.0290147	CYBA/VAMP8	2	GO	LAM1: Cluster2
GO:0072608	GO:interleukin-10 secretion	2/190	11/18670	0.00533418	0.0388599	0.0290147	PYCARD/LGALS9	2	GO	LAM1: Cluster2
GO:1903980	GO:positive regulation of microglial cell activation	2/190	11/18670	0.00533418	0.0388599	0.0290147	CTSC/TREM2	2	GO	LAM1: Cluster2
GO:0009124	GO:nucleoside monophosphate biosynthetic process	7/190	208/18670	0.00550522	0.0400153	0.0298774	FBP1/TREM2/GPD1/TMSB4X/UPP1/ALDOA/NUPR1	7	GO	LAM1: Cluster2
GO:0006006	GO:glucose metabolic process	7/190	209/18670	0.00564826	0.0409626	0.0305847	FBP1/GPD1/GAA/G6PD/RBP4/ALDOA/FABP5	7	GO	LAM1: Cluster2
GO:0010742	GO:macrophage derived foam cell differentiation	3/190	36/18670	0.00578686	0.0415522	0.0310249	LPL/MSR1/PPARG	3	GO	LAM1: Cluster2
GO:0090077	GO:foam cell differentiation	3/190	36/18670	0.00578686	0.0415522	0.0310249	LPL/MSR1/PPARG	3	GO	LAM1: Cluster2
GO:0090322	GO:regulation of superoxide metabolic process	3/190	36/18670	0.00578686	0.0415522	0.0310249	TYROBP/ACP5/CYBA	3	GO	LAM1: Cluster2
GO:2001171	GO:positive regulation of ATP biosynthetic process	3/190	36/18670	0.00578686	0.0415522	0.0310249	TREM2/GPD1/TMSB4X	3	GO	LAM1: Cluster2
GO:0097529	GO:myeloid leukocyte migration	7/190	210/18670	0.00579408	0.0415522	0.0310249	LGALS3/FCER1G/CD74/AIF1/S100A9/TREM2/CXCL3	7	GO	LAM1: Cluster2
GO:0006754	GO:ATP biosynthetic process	6/190	160/18670	0.00597686	0.042673	0.0318617	FBP1/TREM2/GPD1/TMSB4X/ALDOA/NUPR1	6	GO	LAM1: Cluster2
GO:1903305	GO:regulation of regulated secretory pathway	6/190	160/18670	0.00597686	0.042673	0.0318617	FCER1G/LGALS9/LAMP1/STXBP2/HMOX1/VAMP8	6	GO	LAM1: Cluster2
GO:1901653	GO:cellular response to peptide	10/190	385/18670	0.00620183	0.0439354	0.0328043	LPL/ATP6V0B/AKR1B1/TREM2/ANXA5/ATP6V1F/ATP6V0D1/PPARG/CYBA/FOXO3	10	GO	LAM1: Cluster2
GO:0030218	GO:erythrocyte differentiation	5/190	114/18670	0.00622012	0.0439354	0.0328043	INHBA/SPI1/G6PD/FOXO3/DNASE2	5	GO	LAM1: Cluster2
GO:0032272	GO:negative regulation of protein polymerization	4/190	72/18670	0.00623969	0.0439354	0.0328043	CAPG/TMSB4X/VDAC2/PFN1	4	GO	LAM1: Cluster2
GO:2000403	GO:positive regulation of lymphocyte migration	3/190	37/18670	0.00625089	0.0439354	0.0328043	AIF1/PYCARD/SPN	3	GO	LAM1: Cluster2
GO:0050714	GO:positive regulation of protein secretion	8/190	268/18670	0.00627034	0.0439354	0.0328043	LPL/AIF1/PYCARD/TREM2/LGALS9/RGCC/RBP4/GLUL	8	GO	LAM1: Cluster2
GO:0015718	GO:monocarboxylic acid transport	6/190	162/18670	0.00634114	0.0439354	0.0328043	FABP4/APOE/PPARG/NMB/MPC1/PLIN2	6	GO	LAM1: Cluster2
GO:0002002	GO:regulation of angiotensin levels in blood	2/190	12/18670	0.00635835	0.0439354	0.0328043	CTSZ/CES1	2	GO	LAM1: Cluster2
GO:0002003	GO:angiotensin maturation	2/190	12/18670	0.00635835	0.0439354	0.0328043	CTSZ/CES1	2	GO	LAM1: Cluster2
GO:0002921	GO:negative regulation of humoral immune response	2/190	12/18670	0.00635835	0.0439354	0.0328043	VSIG4/SERPING1	2	GO	LAM1: Cluster2
GO:0031392	GO:regulation of prostaglandin biosynthetic process	2/190	12/18670	0.00635835	0.0439354	0.0328043	CD74/FABP5	2	GO	LAM1: Cluster2
GO:0033700	GO:phospholipid efflux	2/190	12/18670	0.00635835	0.0439354	0.0328043	APOC1/APOE	2	GO	LAM1: Cluster2
GO:0034372	GO:very-low-density lipoprotein particle remodeling	2/190	12/18670	0.00635835	0.0439354	0.0328043	LPL/APOE	2	GO	LAM1: Cluster2
GO:0045080	GO:positive regulation of chemokine biosynthetic process	2/190	12/18670	0.00635835	0.0439354	0.0328043	CD74/HMOX1	2	GO	LAM1: Cluster2
GO:2000341	GO:regulation of chemokine (C-X-C motif) ligand 2 production	2/190	12/18670	0.00635835	0.0439354	0.0328043	LPL/CD74	2	GO	LAM1: Cluster2
GO:2001198	GO:regulation of dendritic cell differentiation	2/190	12/18670	0.00635835	0.0439354	0.0328043	CEBPB/LGALS9	2	GO	LAM1: Cluster2
GO:1903050	GO:regulation of proteolysis involved in cellular protein catabolic process	7/190	214/18670	0.00640566	0.0441675	0.0329777	APOE/CTSC/TREM2/GPX1/UBB/NUPR1/BCAP31	7	GO	LAM1: Cluster2
GO:0046677	GO:response to antibiotic	9/190	327/18670	0.00643823	0.0442865	0.0330665	SPI1/HP/FDX1/GPX1/G6PD/PSAP/FOXO3/RBP4/HMOX1	9	GO	LAM1: Cluster2
GO:0030449	GO:regulation of complement activation	5/190	115/18670	0.00645042	0.0442865	0.0330665	C1QB/C1QA/C1QC/VSIG4/SERPING1	5	GO	LAM1: Cluster2
GO:0006801	GO:superoxide metabolic process	4/190	73/18670	0.0065499	0.0447751	0.0334313	TYROBP/ACP5/NCF2/CYBA	4	GO	LAM1: Cluster2
GO:0016485	GO:protein processing	9/190	328/18670	0.0065633	0.0447751	0.0334313	C1QB/C1QA/C1QC/VSIG4/PYCARD/CTSZ/SERPING1/CES1/SEC11A	9	GO	LAM1: Cluster2
GO:0019058	GO:viral life cycle	9/190	328/18670	0.0065633	0.0447751	0.0334313	CD74/APOE/CTSB/LGALS9/UBB/LAMP1/TFRC/IFI27/VAMP8	9	GO	LAM1: Cluster2
GO:0006979	GO:response to oxidative stress	11/190	451/18670	0.00661719	0.0450473	0.0336345	APOE/HP/AIF1/GPX1/NCF2/CYBA/G6PD/PSAP/FOXO3/HMOX1/GPX4	11	GO	LAM1: Cluster2
GO:2000257	GO:regulation of protein activation cascade	5/190	116/18670	0.00668664	0.045424	0.0339158	C1QB/C1QA/C1QC/VSIG4/SERPING1	5	GO	LAM1: Cluster2
GO:0006778	GO:porphyrin-containing compound metabolic process	3/190	38/18670	0.00673652	0.0455706	0.0340252	TSPO/BLVRA/HMOX1	3	GO	LAM1: Cluster2
GO:0050716	GO:positive regulation of interleukin-1 secretion	3/190	38/18670	0.00673652	0.0455706	0.0340252	LPL/PYCARD/LGALS9	3	GO	LAM1: Cluster2
GO:0031670	GO:cellular response to nutrient	4/190	74/18670	0.00687018	0.0461836	0.034483	LPL/PPARG/CYBA/HMOX1	4	GO	LAM1: Cluster2
GO:0032677	GO:regulation of interleukin-8 production	4/190	74/18670	0.00687018	0.0461836	0.034483	CD74/PYCARD/LGALS9/TMSB4X	4	GO	LAM1: Cluster2
GO:1901616	GO:organic hydroxy compound catabolic process	4/190	74/18670	0.00687018	0.0461836	0.034483	COMT/ALDH2/APOE/CYP27A1	4	GO	LAM1: Cluster2
GO:1900371	GO:regulation of purine nucleotide biosynthetic process	5/190	117/18670	0.00692885	0.046481	0.034705	FBP1/TREM2/GPD1/TMSB4X/NUPR1	5	GO	LAM1: Cluster2
GO:1904951	GO:positive regulation of establishment of protein localization	11/190	456/18670	0.00716253	0.0478476	0.0357254	LPL/AIF1/PYCARD/TREM2/OAZ1/LGALS9/CIB1/RGCC/RBP4/BCAP31/GLUL	11	GO	LAM1: Cluster2
GO:0030808	GO:regulation of nucleotide biosynthetic process	5/190	118/18670	0.00717714	0.0478476	0.0357254	FBP1/TREM2/GPD1/TMSB4X/NUPR1	5	GO	LAM1: Cluster2
GO:1990266	GO:neutrophil migration	5/190	118/18670	0.00717714	0.0478476	0.0357254	LGALS3/FCER1G/CD74/S100A9/CXCL3	5	GO	LAM1: Cluster2
GO:0015849	GO:organic acid transport	9/190	333/18670	0.00721695	0.0479146	0.0357754	FABP4/APOE/SLC11A1/PPARG/NMB/PSAP/SLC7A7/MPC1/PLIN2	9	GO	LAM1: Cluster2
GO:0046942	GO:carboxylic acid transport	9/190	333/18670	0.00721695	0.0479146	0.0357754	FABP4/APOE/SLC11A1/PPARG/NMB/PSAP/SLC7A7/MPC1/PLIN2	9	GO	LAM1: Cluster2
GO:0008207	GO:C21-steroid hormone metabolic process	3/190	39/18670	0.00724399	0.0479951	0.0358355	TSPO/FDX1/AKR1B1	3	GO	LAM1: Cluster2
GO:0006707	GO:cholesterol catabolic process	2/190	13/18670	0.00746438	0.0483608	0.0361085	APOE/CYP27A1	2	GO	LAM1: Cluster2
GO:0016127	GO:sterol catabolic process	2/190	13/18670	0.00746438	0.0483608	0.0361085	APOE/CYP27A1	2	GO	LAM1: Cluster2
GO:0033004	GO:negative regulation of mast cell activation	2/190	13/18670	0.00746438	0.0483608	0.0361085	LGALS9/HMOX1	2	GO	LAM1: Cluster2
GO:0043301	GO:negative regulation of leukocyte degranulation	2/190	13/18670	0.00746438	0.0483608	0.0361085	LGALS9/HMOX1	2	GO	LAM1: Cluster2
GO:0045820	GO:negative regulation of glycolytic process	2/190	13/18670	0.00746438	0.0483608	0.0361085	FBP1/NUPR1	2	GO	LAM1: Cluster2
GO:0050872	GO:white fat cell differentiation	2/190	13/18670	0.00746438	0.0483608	0.0361085	FABP4/PPARG	2	GO	LAM1: Cluster2
GO:0060100	GO:positive regulation of phagocytosis, engulfment	2/190	13/18670	0.00746438	0.0483608	0.0361085	TREM2/PPARG	2	GO	LAM1: Cluster2
GO:0090594	GO:inflammatory response to wounding	2/190	13/18670	0.00746438	0.0483608	0.0361085	GRN/HMOX1	2	GO	LAM1: Cluster2
GO:1900272	GO:negative regulation of long-term synaptic potentiation	2/190	13/18670	0.00746438	0.0483608	0.0361085	TYROBP/APOE	2	GO	LAM1: Cluster2
GO:1905155	GO:positive regulation of membrane invagination	2/190	13/18670	0.00746438	0.0483608	0.0361085	TREM2/PPARG	2	GO	LAM1: Cluster2
GO:2000194	GO:regulation of female gonad development	2/190	13/18670	0.00746438	0.0483608	0.0361085	NUPR1/RETN	2	GO	LAM1: Cluster2
GO:0051604	GO:protein maturation	10/190	397/18670	0.00762689	0.0493144	0.0368206	C1QB/C1QA/C1QC/VSIG4/CISD3/PYCARD/CTSZ/SERPING1/CES1/SEC11A	10	GO	LAM1: Cluster2
GO:0001667	GO:ameboidal-type cell migration	11/190	461/18670	0.00774245	0.0497706	0.0371612	GRN/APOE/GPX1/PPARG/TMSB4X/CIB1/RGCC/HMOX1/GLUL/GLIPR2/PFN1	11	GO	LAM1: Cluster2
GO:0048660	GO:regulation of smooth muscle cell proliferation	6/190	169/18670	0.00774382	0.0497706	0.0371612	COMT/AIF1/AKR1B1/PPARG/CYBA/HMOX1	6	GO	LAM1: Cluster2
GO:0050728	GO:negative regulation of inflammatory response	6/190	169/18670	0.00774382	0.0497706	0.0371612	GRN/ACP5/APOE/PYCARD/GPX1/PPARG	6	GO	LAM1: Cluster2
GO:0001990	GO:regulation of systemic arterial blood pressure by hormone	3/190	40/18670	0.00777351	0.049862	0.0372294	CTSZ/CES1/CYBA	3	GO	LAM1: Cluster2
GO:0006809	GO:nitric oxide biosynthetic process	4/190	77/18670	0.00789269	0.0504255	0.0376502	TSPO/GCHFR/ACP5/AIF1	4	GO	LAM1: Cluster2
GO:0048678	GO:response to axon injury	4/190	77/18670	0.00789269	0.0504255	0.0376502	GRN/TSPO/TYROBP/AIF1	4	GO	LAM1: Cluster2
GO:0071496	GO:cellular response to external stimulus	9/190	339/18670	0.00806591	0.0514302	0.0384003	LPL/COMT/CD68/AIF1/PPARG/CYBA/UPP1/HMOX1/GLUL	9	GO	LAM1: Cluster2
GO:0009206	GO:purine ribonucleoside triphosphate biosynthetic process	6/190	171/18670	0.00818265	0.0518664	0.038726	FBP1/TREM2/GPD1/TMSB4X/ALDOA/NUPR1	6	GO	LAM1: Cluster2
GO:0010634	GO:positive regulation of epithelial cell migration	6/190	171/18670	0.00818265	0.0518664	0.038726	GRN/TMSB4X/CIB1/HMOX1/GLIPR2/PFN1	6	GO	LAM1: Cluster2
GO:0048659	GO:smooth muscle cell proliferation	6/190	171/18670	0.00818265	0.0518664	0.038726	COMT/AIF1/AKR1B1/PPARG/CYBA/HMOX1	6	GO	LAM1: Cluster2
GO:0019730	GO:antimicrobial humoral response	5/190	122/18670	0.00823252	0.0519779	0.0388093	LYZ/S100A9/SLC11A1/HMGN2/CXCL3	5	GO	LAM1: Cluster2
GO:0043500	GO:muscle adaptation	5/190	122/18670	0.00823252	0.0519779	0.0388093	AIF1/CYBA/G6PD/FOXO3/HMOX1	5	GO	LAM1: Cluster2
GO:0010955	GO:negative regulation of protein processing	3/190	41/18670	0.00832531	0.0522563	0.0390172	VSIG4/CTSZ/SERPING1	3	GO	LAM1: Cluster2
GO:0097178	GO:ruffle assembly	3/190	41/18670	0.00832531	0.0522563	0.0390172	AIF1/SNX10/PFN1	3	GO	LAM1: Cluster2
GO:1903318	GO:negative regulation of protein maturation	3/190	41/18670	0.00832531	0.0522563	0.0390172	VSIG4/CTSZ/SERPING1	3	GO	LAM1: Cluster2
GO:0009145	GO:purine nucleoside triphosphate biosynthetic process	6/190	172/18670	0.00840865	0.0526768	0.0393311	FBP1/TREM2/GPD1/TMSB4X/ALDOA/NUPR1	6	GO	LAM1: Cluster2
GO:0045785	GO:positive regulation of cell adhesion	10/190	403/18670	0.0084283	0.0526973	0.0393464	HLA-DPA1/HLA-DPB1/CD74/HLA-DMB/AIF1/PYCARD/LGALS9/CIB1/TFRC/MAP3K8	10	GO	LAM1: Cluster2
GO:0071621	GO:granulocyte chemotaxis	5/190	123/18670	0.0085123	0.0531194	0.0396616	LGALS3/FCER1G/CD74/S100A9/CXCL3	5	GO	LAM1: Cluster2
GO:0030193	GO:regulation of blood coagulation	4/190	79/18670	0.00862707	0.0532593	0.039766	FCER1G/APOE/SERPING1/ANXA5	4	GO	LAM1: Cluster2
GO:0006896	GO:Golgi to vacuole transport	2/190	14/18670	0.0086505	0.0532593	0.039766	VTI1B/LAMP1	2	GO	LAM1: Cluster2
GO:0034370	GO:triglyceride-rich lipoprotein particle remodeling	2/190	14/18670	0.0086505	0.0532593	0.039766	LPL/APOE	2	GO	LAM1: Cluster2
GO:0036295	GO:cellular response to increased oxygen levels	2/190	14/18670	0.0086505	0.0532593	0.039766	ATP6V0D1/PPARG	2	GO	LAM1: Cluster2
GO:0046479	GO:glycosphingolipid catabolic process	2/190	14/18670	0.0086505	0.0532593	0.039766	HEXB/PSAP	2	GO	LAM1: Cluster2
GO:0072567	GO:chemokine (C-X-C motif) ligand 2 production	2/190	14/18670	0.0086505	0.0532593	0.039766	LPL/CD74	2	GO	LAM1: Cluster2
GO:2001279	GO:regulation of unsaturated fatty acid biosynthetic process	2/190	14/18670	0.0086505	0.0532593	0.039766	CD74/FABP5	2	GO	LAM1: Cluster2
GO:0140029	GO:exocytic process	4/190	80/18670	0.00901044	0.0551673	0.0411906	FCER1G/VTI1B/STXBP2/VAMP8	4	GO	LAM1: Cluster2
GO:1900046	GO:regulation of hemostasis	4/190	80/18670	0.00901044	0.0551673	0.0411906	FCER1G/APOE/SERPING1/ANXA5	4	GO	LAM1: Cluster2
GO:0055074	GO:calcium ion homeostasis	11/190	471/18670	0.0090118	0.0551673	0.0411906	APOE/ANXA5/GRINA/GSTO1/RMDN3/CYBA/HEXB/CD52/NMB/SNX10/BCAP31	11	GO	LAM1: Cluster2
GO:0050708	GO:regulation of protein secretion	11/190	472/18670	0.0091471	0.0558893	0.0417297	LPL/APOE/AIF1/PYCARD/TREM2/ANXA5/LGALS9/TMSB4X/RGCC/RBP4/GLUL	11	GO	LAM1: Cluster2
GO:2001234	GO:negative regulation of apoptotic signaling pathway	7/190	230/18670	0.00934191	0.0569715	0.0425377	LGALS3/CD74/IFI6/GPX1/GRINA/VDAC2/HMOX1	7	GO	LAM1: Cluster2
GO:0033238	GO:regulation of cellular amine metabolic process	4/190	81/18670	0.00940477	0.0572464	0.042743	COMT/OAZ1/SLC7A7/PSMA7	4	GO	LAM1: Cluster2
GO:0019216	GO:regulation of lipid metabolic process	10/190	410/18670	0.00944356	0.0573741	0.0428383	APOC1/TSPO/CD74/APOE/ABHD5/LAMTOR1/PPARG/PSAP/FABP5/PLIN2	10	GO	LAM1: Cluster2
GO:0002793	GO:positive regulation of peptide secretion	8/190	288/18670	0.00947889	0.0574789	0.0429166	LPL/AIF1/PYCARD/TREM2/LGALS9/RGCC/RBP4/GLUL	8	GO	LAM1: Cluster2
GO:0050850	GO:positive regulation of calcium-mediated signaling	3/190	43/18670	0.00949652	0.0574789	0.0429166	TREM2/GSTO1/CIB1	3	GO	LAM1: Cluster2
GO:0009201	GO:ribonucleoside triphosphate biosynthetic process	6/190	177/18670	0.00960635	0.0580346	0.0433315	FBP1/TREM2/GPD1/TMSB4X/ALDOA/NUPR1	6	GO	LAM1: Cluster2
GO:0007162	GO:negative regulation of cell adhesion	8/190	289/18670	0.00966637	0.0580477	0.0433413	LGALS3/VSIG4/CD74/GPNMB/CEBPB/LGALS9/RGCC/SPN	8	GO	LAM1: Cluster2
GO:0032637	GO:interleukin-8 production	4/190	82/18670	0.00981016	0.0580477	0.0433413	CD74/PYCARD/LGALS9/TMSB4X	4	GO	LAM1: Cluster2
GO:0046209	GO:nitric oxide metabolic process	4/190	82/18670	0.00981016	0.0580477	0.0433413	TSPO/GCHFR/ACP5/AIF1	4	GO	LAM1: Cluster2
GO:1905954	GO:positive regulation of lipid localization	4/190	82/18670	0.00981016	0.0580477	0.0433413	LPL/APOE/MSR1/RETN	4	GO	LAM1: Cluster2
GO:0010950	GO:positive regulation of endopeptidase activity	6/190	178/18670	0.00985976	0.0580477	0.0433413	CTSD/PYCARD/S100A9/PPARG/LGALS9/BCAP31	6	GO	LAM1: Cluster2
GO:0015802	GO:basic amino acid transport	2/190	15/18670	0.00991498	0.0580477	0.0433413	SLC11A1/SLC7A7	2	GO	LAM1: Cluster2
GO:0030812	GO:negative regulation of nucleotide catabolic process	2/190	15/18670	0.00991498	0.0580477	0.0433413	FBP1/NUPR1	2	GO	LAM1: Cluster2
GO:0033008	GO:positive regulation of mast cell activation involved in immune response	2/190	15/18670	0.00991498	0.0580477	0.0433413	FCER1G/VAMP8	2	GO	LAM1: Cluster2
GO:0042159	GO:lipoprotein catabolic process	2/190	15/18670	0.00991498	0.0580477	0.0433413	CTSD/APOE	2	GO	LAM1: Cluster2
GO:0043306	GO:positive regulation of mast cell degranulation	2/190	15/18670	0.00991498	0.0580477	0.0433413	FCER1G/VAMP8	2	GO	LAM1: Cluster2
GO:0045073	GO:regulation of chemokine biosynthetic process	2/190	15/18670	0.00991498	0.0580477	0.0433413	CD74/HMOX1	2	GO	LAM1: Cluster2
GO:0045342	GO:MHC class II biosynthetic process	2/190	15/18670	0.00991498	0.0580477	0.0433413	SPI1/SLC11A1	2	GO	LAM1: Cluster2
GO:0045410	GO:positive regulation of interleukin-6 biosynthetic process	2/190	15/18670	0.00991498	0.0580477	0.0433413	TYROBP/CD74	2	GO	LAM1: Cluster2
GO:0046184	GO:aldehyde biosynthetic process	2/190	15/18670	0.00991498	0.0580477	0.0433413	TKT/PDXK	2	GO	LAM1: Cluster2
GO:0051198	GO:negative regulation of coenzyme metabolic process	2/190	15/18670	0.00991498	0.0580477	0.0433413	FBP1/NUPR1	2	GO	LAM1: Cluster2
GO:0060099	GO:regulation of phagocytosis, engulfment	2/190	15/18670	0.00991498	0.0580477	0.0433413	TREM2/PPARG	2	GO	LAM1: Cluster2
GO:2000484	GO:positive regulation of interleukin-8 secretion	2/190	15/18670	0.00991498	0.0580477	0.0433413	PYCARD/LGALS9	2	GO	LAM1: Cluster2
GO:0071356	GO:cellular response to tumor necrosis factor	8/190	291/18670	0.0100496	0.0585965	0.043751	FABP4/PYCARD/GPD1/CYBA/TMSB4X/CIB1/FOXO3/PSMA7	8	GO	LAM1: Cluster2
GO:0014002	GO:astrocyte development	3/190	44/18670	0.0101163	0.0585965	0.043751	C1QA/GRN/TREM2	3	GO	LAM1: Cluster2
GO:0030225	GO:macrophage differentiation	3/190	44/18670	0.0101163	0.0585965	0.043751	C1QC/INHBA/SPI1	3	GO	LAM1: Cluster2
GO:0090382	GO:phagosome maturation	3/190	44/18670	0.0101163	0.0585965	0.043751	ATP6V0B/ATP6V1F/ATP6V0D1	3	GO	LAM1: Cluster2
GO:2000404	GO:regulation of T cell migration	3/190	44/18670	0.0101163	0.0585965	0.043751	AIF1/PYCARD/SPN	3	GO	LAM1: Cluster2
GO:0048771	GO:tissue remodeling	6/190	179/18670	0.0101179	0.0585965	0.043751	ACP5/CST3/GPNMB/SNX10/TFRC/LIPA	6	GO	LAM1: Cluster2
GO:0071453	GO:cellular response to oxygen levels	7/190	234/18670	0.0102089	0.0588037	0.0439058	ATP6V0D1/PPARG/UBB/FOXO3/RGCC/HMOX1/PSMA7	7	GO	LAM1: Cluster2
GO:0046470	GO:phosphatidylcholine metabolic process	4/190	83/18670	0.0102267	0.0588037	0.0439058	APOC1/PLBD1/PLAAT3/FABP5	4	GO	LAM1: Cluster2
GO:0048145	GO:regulation of fibroblast proliferation	4/190	83/18670	0.0102267	0.0588037	0.0439058	FTH1/CD74/PPARG/NUPR1	4	GO	LAM1: Cluster2
GO:2000106	GO:regulation of leukocyte apoptotic process	4/190	83/18670	0.0102267	0.0588037	0.0439058	LGALS3/FCER1G/CD74/LGALS9	4	GO	LAM1: Cluster2
GO:0009410	GO:response to xenobiotic stimulus	8/190	292/18670	0.0102454	0.0588062	0.0439076	AIF1/CES1/GPX1/GSTO1/PPARG/HNMT/MGST3/FOXO3	8	GO	LAM1: Cluster2
GO:0034754	GO:cellular hormone metabolic process	5/190	129/18670	0.0103304	0.0590833	0.0441145	TSPO/COMT/FDX1/AKR1B1/RBP4	5	GO	LAM1: Cluster2
GO:0044106	GO:cellular amine metabolic process	5/190	129/18670	0.0103304	0.0590833	0.0441145	COMT/OAZ1/HNMT/SLC7A7/PSMA7	5	GO	LAM1: Cluster2
GO:0070613	GO:regulation of protein processing	6/190	180/18670	0.0103808	0.0591921	0.0441957	C1QB/C1QA/C1QC/VSIG4/CTSZ/SERPING1	6	GO	LAM1: Cluster2
GO:0001558	GO:regulation of cell growth	10/190	416/18670	0.0103862	0.0591921	0.0441957	FBP1/CXCL16/INHBA/APOE/S100A9/LAMTOR1/PPARG/CYBA/CIB1/G6PD	10	GO	LAM1: Cluster2
GO:0009260	GO:ribonucleotide biosynthetic process	8/190	293/18670	0.0104441	0.0594168	0.0443635	FBP1/TREM2/GPD1/TMSB4X/UPP1/ALDOA/NUPR1/MPC1	8	GO	LAM1: Cluster2
GO:0009161	GO:ribonucleoside monophosphate metabolic process	9/190	354/18670	0.0105214	0.059751	0.044613	FBP1/TSPO/TREM2/GPD1/TMSB4X/UPP1/ALDOA/NUPR1/NDUFS5	9	GO	LAM1: Cluster2
GO:0010507	GO:negative regulation of autophagy	4/190	84/18670	0.0106546	0.0601892	0.0449402	TSPO/TREM2/NUPR1/HMOX1	4	GO	LAM1: Cluster2
GO:0048144	GO:fibroblast proliferation	4/190	84/18670	0.0106546	0.0601892	0.0449402	FTH1/CD74/PPARG/NUPR1	4	GO	LAM1: Cluster2
GO:0050818	GO:regulation of coagulation	4/190	84/18670	0.0106546	0.0601892	0.0449402	FCER1G/APOE/SERPING1/ANXA5	4	GO	LAM1: Cluster2
GO:0071827	GO:plasma lipoprotein particle organization	3/190	45/18670	0.0107591	0.0606728	0.0453013	APOC1/LPL/APOE	3	GO	LAM1: Cluster2
GO:0009166	GO:nucleotide catabolic process	6/190	182/18670	0.0109211	0.0613718	0.0458232	FBP1/GPX1/GPD1/UPP1/ALDOA/NUPR1	6	GO	LAM1: Cluster2
GO:1903317	GO:regulation of protein maturation	6/190	182/18670	0.0109211	0.0613718	0.0458232	C1QB/C1QA/C1QC/VSIG4/CTSZ/SERPING1	6	GO	LAM1: Cluster2
GO:0034308	GO:primary alcohol metabolic process	4/190	85/18670	0.0110939	0.0616407	0.046024	ALDH2/AKR1B1/GPD1/RBP4	4	GO	LAM1: Cluster2
GO:2001057	GO:reactive nitrogen species metabolic process	4/190	85/18670	0.0110939	0.0616407	0.046024	TSPO/GCHFR/ACP5/AIF1	4	GO	LAM1: Cluster2
GO:0009127	GO:purine nucleoside monophosphate biosynthetic process	6/190	183/18670	0.0111986	0.0616407	0.046024	FBP1/TREM2/GPD1/TMSB4X/ALDOA/NUPR1	6	GO	LAM1: Cluster2
GO:0009168	GO:purine ribonucleoside monophosphate biosynthetic process	6/190	183/18670	0.0111986	0.0616407	0.046024	FBP1/TREM2/GPD1/TMSB4X/ALDOA/NUPR1	6	GO	LAM1: Cluster2
GO:0061136	GO:regulation of proteasomal protein catabolic process	6/190	183/18670	0.0111986	0.0616407	0.046024	APOE/TREM2/GPX1/UBB/NUPR1/BCAP31	6	GO	LAM1: Cluster2
GO:0006957	GO:complement activation, alternative pathway	2/190	16/18670	0.0112561	0.0616407	0.046024	VSIG4/CFD	2	GO	LAM1: Cluster2
GO:0014744	GO:positive regulation of muscle adaptation	2/190	16/18670	0.0112561	0.0616407	0.046024	AIF1/FOXO3	2	GO	LAM1: Cluster2
GO:0019377	GO:glycolipid catabolic process	2/190	16/18670	0.0112561	0.0616407	0.046024	HEXB/PSAP	2	GO	LAM1: Cluster2
GO:0030889	GO:negative regulation of B cell proliferation	2/190	16/18670	0.0112561	0.0616407	0.046024	TYROBP/MNDA	2	GO	LAM1: Cluster2
GO:0042033	GO:chemokine biosynthetic process	2/190	16/18670	0.0112561	0.0616407	0.046024	CD74/HMOX1	2	GO	LAM1: Cluster2
GO:0043031	GO:negative regulation of macrophage activation	2/190	16/18670	0.0112561	0.0616407	0.046024	GRN/VSIG4	2	GO	LAM1: Cluster2
GO:0050755	GO:chemokine metabolic process	2/190	16/18670	0.0112561	0.0616407	0.046024	CD74/HMOX1	2	GO	LAM1: Cluster2
GO:0097067	GO:cellular response to thyroid hormone stimulus	2/190	16/18670	0.0112561	0.0616407	0.046024	CTSB/CTSL	2	GO	LAM1: Cluster2
GO:1905153	GO:regulation of membrane invagination	2/190	16/18670	0.0112561	0.0616407	0.046024	TREM2/PPARG	2	GO	LAM1: Cluster2
GO:2001170	GO:negative regulation of ATP biosynthetic process	2/190	16/18670	0.0112561	0.0616407	0.046024	FBP1/NUPR1	2	GO	LAM1: Cluster2
GO:0033002	GO:muscle cell proliferation	7/190	239/18670	0.0113734	0.0618292	0.0461647	COMT/AIF1/AKR1B1/PPARG/CYBA/RBP4/HMOX1	7	GO	LAM1: Cluster2
GO:0002437	GO:inflammatory response to antigenic stimulus	3/190	46/18670	0.011425	0.0618292	0.0461647	CD68/FCER1G/GPX1	3	GO	LAM1: Cluster2
GO:0022602	GO:ovulation cycle process	3/190	46/18670	0.011425	0.0618292	0.0461647	INHBA/FOXO3/RETN	3	GO	LAM1: Cluster2
GO:0030810	GO:positive regulation of nucleotide biosynthetic process	3/190	46/18670	0.011425	0.0618292	0.0461647	TREM2/GPD1/TMSB4X	3	GO	LAM1: Cluster2
GO:0043277	GO:apoptotic cell clearance	3/190	46/18670	0.011425	0.0618292	0.0461647	MARCO/TYROBP/TREM2	3	GO	LAM1: Cluster2
GO:0050706	GO:regulation of interleukin-1 beta secretion	3/190	46/18670	0.011425	0.0618292	0.0461647	LPL/PYCARD/LGALS9	3	GO	LAM1: Cluster2
GO:1900373	GO:positive regulation of purine nucleotide biosynthetic process	3/190	46/18670	0.011425	0.0618292	0.0461647	TREM2/GPD1/TMSB4X	3	GO	LAM1: Cluster2
GO:0042446	GO:hormone biosynthetic process	4/190	86/18670	0.0115447	0.0623723	0.0465703	TSPO/CYP27A1/FDX1/AKR1B1	4	GO	LAM1: Cluster2
GO:0009896	GO:positive regulation of catabolic process	10/190	423/18670	0.0115748	0.0624301	0.0466134	APOE/CTSC/ABHD5/TREM2/OAZ1/GPD1/FOXO3/NUPR1/HMOX1/BCAP31	10	GO	LAM1: Cluster2
GO:1903708	GO:positive regulation of hemopoiesis	6/190	185/18670	0.0117686	0.0633693	0.0473146	TYROBP/INHBA/CD74/TREM2/LGALS9/FOXO3	6	GO	LAM1: Cluster2
GO:0031331	GO:positive regulation of cellular catabolic process	9/190	361/18670	0.0118432	0.0636644	0.047535	APOE/CTSC/ABHD5/TREM2/GPD1/FOXO3/NUPR1/HMOX1/BCAP31	9	GO	LAM1: Cluster2
GO:0002920	GO:regulation of humoral immune response	5/190	134/18670	0.0120358	0.064592	0.0482276	C1QB/C1QA/C1QC/VSIG4/SERPING1	5	GO	LAM1: Cluster2
GO:0045646	GO:regulation of erythrocyte differentiation	3/190	47/18670	0.0121141	0.0649044	0.0484608	INHBA/SPI1/FOXO3	3	GO	LAM1: Cluster2
GO:0045861	GO:negative regulation of proteolysis	9/190	363/18670	0.0122427	0.0654842	0.0488937	VSIG4/CSTB/IFI6/CST3/SERPINA1/CTSZ/CSTA/SERPING1/GPX1	9	GO	LAM1: Cluster2
GO:1905475	GO:regulation of protein localization to membrane	6/190	187/18670	0.0123587	0.0659071	0.0492095	LGALS3/TREM2/RER1/CIB1/VTI1B/VAMP8	6	GO	LAM1: Cluster2
GO:0034599	GO:cellular response to oxidative stress	8/190	302/18670	0.0123627	0.0659071	0.0492095	AIF1/GPX1/NCF2/CYBA/G6PD/PSAP/FOXO3/HMOX1	8	GO	LAM1: Cluster2
GO:0050921	GO:positive regulation of chemotaxis	5/190	135/18670	0.0123984	0.0659883	0.0492701	CD74/AIF1/TREM2/LGALS9/TMSB4X	5	GO	LAM1: Cluster2
GO:0010038	GO:response to metal ion	9/190	364/18670	0.0124462	0.0661333	0.0493784	C1QA/FBP1/TSPO/FABP4/BSG/ALOX5AP/ANXA5/G6PD/HMOX1	9	GO	LAM1: Cluster2
GO:1904035	GO:regulation of epithelial cell apoptotic process	4/190	88/18670	0.0124812	0.0662102	0.0494358	FOXO3/RGCC/NUPR1/HMOX1	4	GO	LAM1: Cluster2
GO:0032102	GO:negative regulation of response to external stimulus	9/190	365/18670	0.0126522	0.0665656	0.0497012	GRN/ACP5/APOE/AIF1/PYCARD/SERPING1/ANXA5/GPX1/PPARG	9	GO	LAM1: Cluster2
GO:0009142	GO:nucleoside triphosphate biosynthetic process	6/190	188/18670	0.0126614	0.0665656	0.0497012	FBP1/TREM2/GPD1/TMSB4X/ALDOA/NUPR1	6	GO	LAM1: Cluster2
GO:1901292	GO:nucleoside phosphate catabolic process	6/190	188/18670	0.0126614	0.0665656	0.0497012	FBP1/GPX1/GPD1/UPP1/ALDOA/NUPR1	6	GO	LAM1: Cluster2
GO:0010744	GO:positive regulation of macrophage derived foam cell differentiation	2/190	17/18670	0.0126723	0.0665656	0.0497012	LPL/MSR1	2	GO	LAM1: Cluster2
GO:0036149	GO:phosphatidylinositol acyl-chain remodeling	2/190	17/18670	0.0126723	0.0665656	0.0497012	PLBD1/PLAAT3	2	GO	LAM1: Cluster2
GO:0060850	GO:regulation of transcription involved in cell fate commitment	2/190	17/18670	0.0126723	0.0665656	0.0497012	PPARG/CEBPB	2	GO	LAM1: Cluster2
GO:0009311	GO:oligosaccharide metabolic process	3/190	48/18670	0.0128267	0.0672672	0.050225	FBP1/GAA/HEXB	3	GO	LAM1: Cluster2
GO:0006644	GO:phospholipid metabolic process	10/190	430/18670	0.0128638	0.067352	0.0502884	APOC1/LPL/PTPMT1/ABHD5/PLBD1/GPD1/HEXB/PLAAT3/FABP5/GPX4	10	GO	LAM1: Cluster2
GO:0006094	GO:gluconeogenesis	4/190	89/18670	0.0129672	0.0677831	0.0506102	FBP1/GPD1/RBP4/ALDOA	4	GO	LAM1: Cluster2
GO:0046034	GO:ATP metabolic process	8/190	305/18670	0.0130564	0.0681389	0.0508759	FBP1/TSPO/TREM2/GPD1/TMSB4X/ALDOA/NUPR1/NDUFS5	8	GO	LAM1: Cluster2
GO:0051090	GO:regulation of DNA-binding transcription factor activity	10/190	432/18670	0.0132513	0.0690439	0.0515515	PYCARD/S100A9/PPARG/LGALS9/UBB/TMSB4X/CIB1/RGCC/NUPR1/HMOX1	10	GO	LAM1: Cluster2
GO:0071248	GO:cellular response to metal ion	6/190	190/18670	0.0132824	0.0690944	0.0515893	FBP1/TSPO/FABP4/ALOX5AP/ANXA5/HMOX1	6	GO	LAM1: Cluster2
GO:1903362	GO:regulation of cellular protein catabolic process	7/190	247/18670	0.0134327	0.0696528	0.0520062	APOE/CTSC/TREM2/GPX1/UBB/NUPR1/BCAP31	7	GO	LAM1: Cluster2
GO:0035690	GO:cellular response to drug	9/190	369/18670	0.0135018	0.0696528	0.0520062	FBP1/SPI1/FDX1/AIF1/CYBA/TFRC/PSAP/FOXO3/HMOX1	9	GO	LAM1: Cluster2
GO:0009308	GO:amine metabolic process	5/190	138/18670	0.0135307	0.0696528	0.0520062	COMT/OAZ1/HNMT/SLC7A7/PSMA7	5	GO	LAM1: Cluster2
GO:0003044	GO:regulation of systemic arterial blood pressure mediated by a chemical signal	3/190	49/18670	0.0135628	0.0696528	0.0520062	CTSZ/CES1/CYBA	3	GO	LAM1: Cluster2
GO:0008347	GO:glial cell migration	3/190	49/18670	0.0135628	0.0696528	0.0520062	TSPO/TREM2/HEXB	3	GO	LAM1: Cluster2
GO:0010712	GO:regulation of collagen metabolic process	3/190	49/18670	0.0135628	0.0696528	0.0520062	CST3/PPARG/RGCC	3	GO	LAM1: Cluster2
GO:0032757	GO:positive regulation of interleukin-8 production	3/190	49/18670	0.0135628	0.0696528	0.0520062	CD74/PYCARD/LGALS9	3	GO	LAM1: Cluster2
GO:0071825	GO:protein-lipid complex subunit organization	3/190	49/18670	0.0135628	0.0696528	0.0520062	APOC1/LPL/APOE	3	GO	LAM1: Cluster2
GO:0050673	GO:epithelial cell proliferation	10/190	434/18670	0.0136475	0.0699758	0.0522474	GRN/APOE/GPX1/PPARG/CEBPB/CYBA/RGCC/NUPR1/HMOX1/GLUL	10	GO	LAM1: Cluster2
GO:0046434	GO:organophosphate catabolic process	7/190	248/18670	0.0137077	0.0701731	0.0523947	APOC1/FBP1/GPX1/GPD1/UPP1/ALDOA/NUPR1	7	GO	LAM1: Cluster2
GO:0002700	GO:regulation of production of molecular mediator of immune response	5/190	139/18670	0.0139231	0.0710496	0.0530491	FCER1G/CD74/TFRC/RBP4/HMOX1	5	GO	LAM1: Cluster2
GO:0050715	GO:positive regulation of cytokine secretion	5/190	139/18670	0.0139231	0.0710496	0.0530491	LPL/AIF1/PYCARD/LGALS9/RGCC	5	GO	LAM1: Cluster2
GO:0043434	GO:response to peptide hormone	10/190	436/18670	0.0140525	0.071587	0.0534503	LPL/BSG/ATP6V0B/ANXA5/ATP6V1F/ATP6V0D1/PPARG/CYBA/FOXO3/RETN	10	GO	LAM1: Cluster2
GO:0010713	GO:negative regulation of collagen metabolic process	2/190	18/18670	0.0141618	0.071587	0.0534503	CST3/PPARG	2	GO	LAM1: Cluster2
GO:0030809	GO:negative regulation of nucleotide biosynthetic process	2/190	18/18670	0.0141618	0.071587	0.0534503	FBP1/NUPR1	2	GO	LAM1: Cluster2
GO:0045056	GO:transcytosis	2/190	18/18670	0.0141618	0.071587	0.0534503	FCGRT/LRPAP1	2	GO	LAM1: Cluster2
GO:1900372	GO:negative regulation of purine nucleotide biosynthetic process	2/190	18/18670	0.0141618	0.071587	0.0534503	FBP1/NUPR1	2	GO	LAM1: Cluster2
GO:1903019	GO:negative regulation of glycoprotein metabolic process	2/190	18/18670	0.0141618	0.071587	0.0534503	CST3/ITM2B	2	GO	LAM1: Cluster2
GO:1901654	GO:response to ketone	6/190	193/18670	0.0142535	0.0719077	0.0536898	TSPO/FDX1/AKR1B1/PPARG/CYBA/FOXO3	6	GO	LAM1: Cluster2
GO:0010951	GO:negative regulation of endopeptidase activity	7/190	250/18670	0.0142699	0.0719077	0.0536898	CSTB/IFI6/CST3/SERPINA1/CSTA/SERPING1/GPX1	7	GO	LAM1: Cluster2
GO:1903364	GO:positive regulation of cellular protein catabolic process	5/190	140/18670	0.0143231	0.0720629	0.0538057	APOE/CTSC/TREM2/NUPR1/BCAP31	5	GO	LAM1: Cluster2
GO:1990778	GO:protein localization to cell periphery	8/190	311/18670	0.014529	0.0729849	0.0544941	LGALS3/FCER1G/BSG/TREM2/RER1/CIB1/VTI1B/VAMP8	8	GO	LAM1: Cluster2
GO:0097530	GO:granulocyte migration	5/190	141/18670	0.0147307	0.073883	0.0551647	LGALS3/FCER1G/CD74/S100A9/CXCL3	5	GO	LAM1: Cluster2
GO:0009123	GO:nucleoside monophosphate metabolic process	9/190	375/18670	0.0148548	0.0743894	0.0555428	FBP1/TSPO/TREM2/GPD1/TMSB4X/UPP1/ALDOA/NUPR1/NDUFS5	9	GO	LAM1: Cluster2
GO:1901655	GO:cellular response to ketone	4/190	93/18670	0.0150311	0.0751557	0.0561149	FDX1/AKR1B1/PPARG/FOXO3	4	GO	LAM1: Cluster2
GO:0007034	GO:vacuolar transport	5/190	142/18670	0.0151461	0.0754959	0.0563689	GRN/ATP6V0D1/VTI1B/LAMP1/PSAP	5	GO	LAM1: Cluster2
GO:1902904	GO:negative regulation of supramolecular fiber organization	5/190	142/18670	0.0151461	0.0754959	0.0563689	APOE/CAPG/TMSB4X/CIB1/PFN1	5	GO	LAM1: Cluster2
GO:0050678	GO:regulation of epithelial cell proliferation	9/190	378/18670	0.0155677	0.0772946	0.057712	GRN/APOE/GPX1/PPARG/CYBA/RGCC/NUPR1/HMOX1/GLUL	9	GO	LAM1: Cluster2
GO:0001991	GO:regulation of systemic arterial blood pressure by circulatory renin-angiotensin	2/190	19/18670	0.015723	0.0772946	0.057712	CTSZ/CES1	2	GO	LAM1: Cluster2
GO:0010888	GO:negative regulation of lipid storage	2/190	19/18670	0.015723	0.0772946	0.057712	ABHD5/PPARG	2	GO	LAM1: Cluster2
GO:0010985	GO:negative regulation of lipoprotein particle clearance	2/190	19/18670	0.015723	0.0772946	0.057712	APOC1/LRPAP1	2	GO	LAM1: Cluster2
GO:0032930	GO:positive regulation of superoxide anion generation	2/190	19/18670	0.015723	0.0772946	0.057712	TYROBP/CYBA	2	GO	LAM1: Cluster2
GO:0061081	GO:positive regulation of myeloid leukocyte cytokine production involved in immune response	2/190	19/18670	0.015723	0.0772946	0.057712	FCER1G/CD74	2	GO	LAM1: Cluster2
GO:0071243	GO:cellular response to arsenic-containing substance	2/190	19/18670	0.015723	0.0772946	0.057712	GSTO1/HMOX1	2	GO	LAM1: Cluster2
GO:1905939	GO:regulation of gonad development	2/190	19/18670	0.015723	0.0772946	0.057712	NUPR1/RETN	2	GO	LAM1: Cluster2
GO:2000010	GO:positive regulation of protein localization to cell surface	2/190	19/18670	0.015723	0.0772946	0.057712	TYROBP/FCER1G	2	GO	LAM1: Cluster2
GO:0031529	GO:ruffle organization	3/190	52/18670	0.0159132	0.0779915	0.0582323	AIF1/SNX10/PFN1	3	GO	LAM1: Cluster2
GO:0050885	GO:neuromuscular process controlling balance	3/190	52/18670	0.0159132	0.0779915	0.0582323	GAA/HEXB/PSAP	3	GO	LAM1: Cluster2
GO:0031099	GO:regeneration	6/190	198/18670	0.0159803	0.0780614	0.0582845	GRN/TSPO/GPX1/PPARG/CEBPB/HMOX1	6	GO	LAM1: Cluster2
GO:0044282	GO:small molecule catabolic process	10/190	445/18670	0.0159876	0.0780614	0.0582845	ALDH2/APOE/CYP27A1/HEXB/HNMT/UPP1/DECR1/ALDOA/PGD/GLUL	10	GO	LAM1: Cluster2
GO:1904064	GO:positive regulation of cation transmembrane transport	5/190	144/18670	0.0160002	0.0780614	0.0582845	TREM2/GLRX/GSTO1/TMSB4X/G6PD	5	GO	LAM1: Cluster2
GO:0002702	GO:positive regulation of production of molecular mediator of immune response	4/190	95/18670	0.0161364	0.0784883	0.0586033	FCER1G/CD74/TFRC/RBP4	4	GO	LAM1: Cluster2
GO:0042100	GO:B cell proliferation	4/190	95/18670	0.0161364	0.0784883	0.0586033	TYROBP/CD74/MNDA/TFRC	4	GO	LAM1: Cluster2
GO:0042176	GO:regulation of protein catabolic process	9/190	381/18670	0.0163054	0.0791908	0.0591277	APOE/CTSC/CST3/TREM2/OAZ1/GPX1/UBB/NUPR1/BCAP31	9	GO	LAM1: Cluster2
GO:0019217	GO:regulation of fatty acid metabolic process	4/190	96/18670	0.0167077	0.0802329	0.0599058	APOC1/CD74/PPARG/FABP5	4	GO	LAM1: Cluster2
GO:0042632	GO:cholesterol homeostasis	4/190	96/18670	0.0167077	0.0802329	0.0599058	LPL/FABP4/APOE/LAMTOR1	4	GO	LAM1: Cluster2
GO:1990823	GO:response to leukemia inhibitory factor	4/190	96/18670	0.0167077	0.0802329	0.0599058	PCOLCE2/SNX10/TFRC/MPC1	4	GO	LAM1: Cluster2
GO:1990830	GO:cellular response to leukemia inhibitory factor	4/190	96/18670	0.0167077	0.0802329	0.0599058	PCOLCE2/SNX10/TFRC/MPC1	4	GO	LAM1: Cluster2
GO:0030195	GO:negative regulation of blood coagulation	3/190	53/18670	0.0167442	0.0802329	0.0599058	APOE/SERPING1/ANXA5	3	GO	LAM1: Cluster2
GO:0050702	GO:interleukin-1 beta secretion	3/190	53/18670	0.0167442	0.0802329	0.0599058	LPL/PYCARD/LGALS9	3	GO	LAM1: Cluster2
GO:0050704	GO:regulation of interleukin-1 secretion	3/190	53/18670	0.0167442	0.0802329	0.0599058	LPL/PYCARD/LGALS9	3	GO	LAM1: Cluster2
GO:0070228	GO:regulation of lymphocyte apoptotic process	3/190	53/18670	0.0167442	0.0802329	0.0599058	LGALS3/CD74/LGALS9	3	GO	LAM1: Cluster2
GO:1903307	GO:positive regulation of regulated secretory pathway	3/190	53/18670	0.0167442	0.0802329	0.0599058	FCER1G/LAMP1/VAMP8	3	GO	LAM1: Cluster2
GO:0042542	GO:response to hydrogen peroxide	5/190	146/18670	0.0168858	0.080671	0.0602329	HP/GPX1/PSAP/FOXO3/HMOX1	5	GO	LAM1: Cluster2
GO:0045834	GO:positive regulation of lipid metabolic process	5/190	146/18670	0.0168858	0.080671	0.0602329	APOC1/CD74/APOE/ABHD5/PPARG	5	GO	LAM1: Cluster2
GO:0007568	GO:aging	8/190	321/18670	0.0172469	0.081459	0.0608213	C1QA/TSPO/CD68/CTSC/SERPING1/FOXO3/GPX4/RETN	8	GO	LAM1: Cluster2
GO:0071375	GO:cellular response to peptide hormone stimulus	8/190	321/18670	0.0172469	0.081459	0.0608213	LPL/ATP6V0B/ANXA5/ATP6V1F/ATP6V0D1/PPARG/CYBA/FOXO3	8	GO	LAM1: Cluster2
GO:0055092	GO:sterol homeostasis	4/190	97/18670	0.0172915	0.081459	0.0608213	LPL/FABP4/APOE/LAMTOR1	4	GO	LAM1: Cluster2
GO:0120162	GO:positive regulation of cold-induced thermogenesis	4/190	97/18670	0.0172915	0.081459	0.0608213	FABP4/CEBPB/DECR1/FABP5	4	GO	LAM1: Cluster2
GO:0032816	GO:positive regulation of natural killer cell activation	2/190	20/18670	0.0173543	0.081459	0.0608213	TYROBP/LAMP1	2	GO	LAM1: Cluster2
GO:0033005	GO:positive regulation of mast cell activation	2/190	20/18670	0.0173543	0.081459	0.0608213	FCER1G/VAMP8	2	GO	LAM1: Cluster2
GO:0033194	GO:response to hydroperoxide	2/190	20/18670	0.0173543	0.081459	0.0608213	AIF1/GPX1	2	GO	LAM1: Cluster2
GO:0042535	GO:positive regulation of tumor necrosis factor biosynthetic process	2/190	20/18670	0.0173543	0.081459	0.0608213	TYROBP/SPN	2	GO	LAM1: Cluster2
GO:0045019	GO:negative regulation of nitric oxide biosynthetic process	2/190	20/18670	0.0173543	0.081459	0.0608213	TSPO/ACP5	2	GO	LAM1: Cluster2
GO:0046514	GO:ceramide catabolic process	2/190	20/18670	0.0173543	0.081459	0.0608213	HEXB/PSAP	2	GO	LAM1: Cluster2
GO:1900424	GO:regulation of defense response to bacterium	2/190	20/18670	0.0173543	0.081459	0.0608213	GRN/CYBA	2	GO	LAM1: Cluster2
GO:1904406	GO:negative regulation of nitric oxide metabolic process	2/190	20/18670	0.0173543	0.081459	0.0608213	TSPO/ACP5	2	GO	LAM1: Cluster2
GO:0002763	GO:positive regulation of myeloid leukocyte differentiation	3/190	54/18670	0.0175992	0.0822489	0.0614111	TYROBP/CD74/TREM2	3	GO	LAM1: Cluster2
GO:0046164	GO:alcohol catabolic process	3/190	54/18670	0.0175992	0.0822489	0.0614111	ALDH2/APOE/CYP27A1	3	GO	LAM1: Cluster2
GO:1900047	GO:negative regulation of hemostasis	3/190	54/18670	0.0175992	0.0822489	0.0614111	APOE/SERPING1/ANXA5	3	GO	LAM1: Cluster2
GO:0051091	GO:positive regulation of DNA-binding transcription factor activity	7/190	261/18670	0.0176599	0.0824128	0.0615334	PYCARD/S100A9/PPARG/LGALS9/UBB/CIB1/RGCC	7	GO	LAM1: Cluster2
GO:0002792	GO:negative regulation of peptide secretion	5/190	148/18670	0.0178034	0.0829624	0.0619438	CD74/APOE/ANXA5/TMSB4X/RGCC	5	GO	LAM1: Cluster2
GO:2001243	GO:negative regulation of intrinsic apoptotic signaling pathway	4/190	98/18670	0.0178879	0.0832355	0.0621477	CD74/GPX1/GRINA/VDAC2	4	GO	LAM1: Cluster2
GO:0010466	GO:negative regulation of peptidase activity	7/190	262/18670	0.0179939	0.083608	0.0624259	CSTB/IFI6/CST3/SERPINA1/CSTA/SERPING1/GPX1	7	GO	LAM1: Cluster2
GO:1903829	GO:positive regulation of cellular protein localization	8/190	324/18670	0.0181293	0.0841158	0.062805	TYROBP/LGALS3/FCER1G/TREM2/OAZ1/RER1/CIB1/BCAP31	8	GO	LAM1: Cluster2
GO:0051092	GO:positive regulation of NF-kappaB transcription factor activity	5/190	149/18670	0.0182744	0.0846668	0.0632164	PYCARD/S100A9/LGALS9/UBB/CIB1	5	GO	LAM1: Cluster2
GO:0001541	GO:ovarian follicle development	3/190	55/18670	0.0184782	0.0853655	0.0637381	INHBA/CEBPB/FOXO3	3	GO	LAM1: Cluster2
GO:0042304	GO:regulation of fatty acid biosynthetic process	3/190	55/18670	0.0184782	0.0853655	0.0637381	APOC1/CD74/FABP5	3	GO	LAM1: Cluster2
GO:0051188	GO:cofactor biosynthetic process	8/190	326/18670	0.0187353	0.0862659	0.0644104	FBP1/TSPO/GPD1/CYBA/ALDOA/NUPR1/PDXK/MPC1	8	GO	LAM1: Cluster2
GO:0002455	GO:humoral immune response mediated by circulating immunoglobulin	5/190	150/18670	0.0187535	0.0862659	0.0644104	C1QB/C1QA/C1QC/HLA-DQB1/SERPING1	5	GO	LAM1: Cluster2
GO:0072525	GO:pyridine-containing compound biosynthetic process	5/190	150/18670	0.0187535	0.0862659	0.0644104	FBP1/GPD1/ALDOA/NUPR1/PDXK	5	GO	LAM1: Cluster2
GO:0030728	GO:ovulation	2/190	21/18670	0.0190542	0.0869044	0.0648871	INHBA/FOXO3	2	GO	LAM1: Cluster2
GO:0035357	GO:peroxisome proliferator activated receptor signaling pathway	2/190	21/18670	0.0190542	0.0869044	0.0648871	PPARG/FABP5	2	GO	LAM1: Cluster2
GO:0042135	GO:neurotransmitter catabolic process	2/190	21/18670	0.0190542	0.0869044	0.0648871	COMT/HNMT	2	GO	LAM1: Cluster2
GO:0046716	GO:muscle cell cellular homeostasis	2/190	21/18670	0.0190542	0.0869044	0.0648871	GAA/ALDOA	2	GO	LAM1: Cluster2
GO:0051900	GO:regulation of mitochondrial depolarization	2/190	21/18670	0.0190542	0.0869044	0.0648871	TSPO/IFI6	2	GO	LAM1: Cluster2
GO:1904469	GO:positive regulation of tumor necrosis factor secretion	2/190	21/18670	0.0190542	0.0869044	0.0648871	LPL/LGALS9	2	GO	LAM1: Cluster2
GO:0006874	GO:cellular calcium ion homeostasis	10/190	458/18670	0.0191241	0.0871001	0.0650332	APOE/ANXA5/GRINA/GSTO1/RMDN3/CYBA/HEXB/CD52/NMB/BCAP31	10	GO	LAM1: Cluster2
GO:0016999	GO:antibiotic metabolic process	5/190	151/18670	0.0192408	0.0875075	0.0653374	ALDH2/HP/AKR1B1/GPX1/CYBA	5	GO	LAM1: Cluster2
GO:0046883	GO:regulation of hormone secretion	7/190	266/18670	0.0193745	0.0879916	0.0656989	INHBA/ANXA5/NMB/RBP4/GLUL/RETN/VAMP8	7	GO	LAM1: Cluster2
GO:0072331	GO:signal transduction by p53 class mediator	7/190	267/18670	0.019731	0.0894597	0.066795	CD74/PHLDA3/PYCARD/UBB/FOXO3/RGCC/NUPR1	7	GO	LAM1: Cluster2
GO:0048661	GO:positive regulation of smooth muscle cell proliferation	4/190	101/18670	0.0197534	0.0894597	0.066795	AIF1/AKR1B1/CYBA/HMOX1	4	GO	LAM1: Cluster2
GO:0010639	GO:negative regulation of organelle organization	9/190	395/18670	0.0200916	0.0908636	0.0678433	TSPO/SPI1/CAPG/GPX1/TMSB4X/CIB1/RGCC/NUPR1/PFN1	9	GO	LAM1: Cluster2
GO:0051701	GO:interaction with host	6/190	209/18670	0.020278	0.0912025	0.0680962	CD74/CTSB/LGALS9/LAMP1/TFRC/VAMP8	6	GO	LAM1: Cluster2
GO:0033344	GO:cholesterol efflux	3/190	57/18670	0.0203081	0.0912025	0.0680962	APOC1/APOE/LAMTOR1	3	GO	LAM1: Cluster2
GO:0042743	GO:hydrogen peroxide metabolic process	3/190	57/18670	0.0203081	0.0912025	0.0680962	HP/GPX1/CYBA	3	GO	LAM1: Cluster2
GO:0050819	GO:negative regulation of coagulation	3/190	57/18670	0.0203081	0.0912025	0.0680962	APOE/SERPING1/ANXA5	3	GO	LAM1: Cluster2
GO:1903428	GO:positive regulation of reactive oxygen species biosynthetic process	3/190	57/18670	0.0203081	0.0912025	0.0680962	AIF1/CYBA/FOXO3	3	GO	LAM1: Cluster2
GO:0002367	GO:cytokine production involved in immune response	4/190	102/18670	0.0204009	0.0914913	0.0683119	FCER1G/CD74/SLC11A1/HMOX1	4	GO	LAM1: Cluster2
GO:0050707	GO:regulation of cytokine secretion	6/190	210/18670	0.020704	0.0923769	0.0689732	LPL/AIF1/PYCARD/LGALS9/TMSB4X/RGCC	6	GO	LAM1: Cluster2
GO:0010884	GO:positive regulation of lipid storage	2/190	22/18670	0.0208211	0.0923769	0.0689732	LPL/MSR1	2	GO	LAM1: Cluster2
GO:0032469	GO:endoplasmic reticulum calcium ion homeostasis	2/190	22/18670	0.0208211	0.0923769	0.0689732	GRINA/BCAP31	2	GO	LAM1: Cluster2
GO:0035929	GO:steroid hormone secretion	2/190	22/18670	0.0208211	0.0923769	0.0689732	INHBA/RETN	2	GO	LAM1: Cluster2
GO:0045649	GO:regulation of macrophage differentiation	2/190	22/18670	0.0208211	0.0923769	0.0689732	C1QC/INHBA	2	GO	LAM1: Cluster2
GO:1901685	GO:glutathione derivative metabolic process	2/190	22/18670	0.0208211	0.0923769	0.0689732	GSTO1/MGST3	2	GO	LAM1: Cluster2
GO:1901687	GO:glutathione derivative biosynthetic process	2/190	22/18670	0.0208211	0.0923769	0.0689732	GSTO1/MGST3	2	GO	LAM1: Cluster2
GO:0007548	GO:sex differentiation	7/190	270/18670	0.0208278	0.0923769	0.0689732	INHBA/CEBPB/UBB/FOXO3/RBP4/NUPR1/RETN	7	GO	LAM1: Cluster2
GO:0017001	GO:antibiotic catabolic process	3/190	58/18670	0.0212592	0.0938069	0.0700409	ALDH2/HP/GPX1	3	GO	LAM1: Cluster2
GO:0030837	GO:negative regulation of actin filament polymerization	3/190	58/18670	0.0212592	0.0938069	0.0700409	CAPG/TMSB4X/PFN1	3	GO	LAM1: Cluster2
GO:1902041	GO:regulation of extrinsic apoptotic signaling pathway via death domain receptors	3/190	58/18670	0.0212592	0.0938069	0.0700409	LGALS3/GPX1/HMOX1	3	GO	LAM1: Cluster2
GO:0051346	GO:negative regulation of hydrolase activity	10/190	466/18670	0.0212668	0.0938069	0.0700409	APOC1/LGALS3/GCHFR/CSTB/IFI6/CST3/SERPINA1/CSTA/SERPING1/GPX1	10	GO	LAM1: Cluster2
GO:0006888	GO:ER to Golgi vesicle-mediated transport	6/190	212/18670	0.0215741	0.0946797	0.0706926	CTSC/SERPINA1/CTSZ/VTI1B/BCAP31/CNIH4	6	GO	LAM1: Cluster2
GO:0071219	GO:cellular response to molecule of bacterial origin	6/190	212/18670	0.0215741	0.0946797	0.0706926	TSPO/CD68/PYCARD/TREM2/CEBPB/CXCL3	6	GO	LAM1: Cluster2
GO:0032868	GO:response to insulin	7/190	272/18670	0.0215823	0.0946797	0.0706926	LPL/ATP6V0B/ATP6V1F/ATP6V0D1/PPARG/FOXO3/RETN	7	GO	LAM1: Cluster2
GO:1902105	GO:regulation of leukocyte differentiation	7/190	272/18670	0.0215823	0.0946797	0.0706926	C1QC/TYROBP/INHBA/CD74/TREM2/CEBPB/LGALS9	7	GO	LAM1: Cluster2
GO:0009205	GO:purine ribonucleoside triphosphate metabolic process	8/190	335/18670	0.0216429	0.0948165	0.0707946	FBP1/TSPO/TREM2/GPD1/TMSB4X/ALDOA/NUPR1/NDUFS5	8	GO	LAM1: Cluster2
GO:0001523	GO:retinoid metabolic process	4/190	104/18670	0.0217347	0.0948317	0.070806	LPL/APOE/AKR1B1/RBP4	4	GO	LAM1: Cluster2
GO:0032414	GO:positive regulation of ion transmembrane transporter activity	4/190	104/18670	0.0217347	0.0948317	0.070806	TREM2/GLRX/GSTO1/TMSB4X	4	GO	LAM1: Cluster2
GO:2001237	GO:negative regulation of extrinsic apoptotic signaling pathway	4/190	104/18670	0.0217347	0.0948317	0.070806	LGALS3/IFI6/GPX1/HMOX1	4	GO	LAM1: Cluster2
GO:0034767	GO:positive regulation of ion transmembrane transport	5/190	156/18670	0.0218022	0.0949974	0.0709297	TREM2/GLRX/GSTO1/TMSB4X/G6PD	5	GO	LAM1: Cluster2
GO:0001836	GO:release of cytochrome c from mitochondria	3/190	59/18670	0.0222343	0.0966186	0.0721402	PYCARD/IFI6/GPX1	3	GO	LAM1: Cluster2
GO:0097755	GO:positive regulation of blood vessel diameter	3/190	59/18670	0.0222343	0.0966186	0.0721402	APOE/GPX1/HMOX1	3	GO	LAM1: Cluster2
GO:0002821	GO:positive regulation of adaptive immune response	4/190	105/18670	0.0224212	0.0972996	0.0726486	FCER1G/PYCARD/SLC11A1/TFRC	4	GO	LAM1: Cluster2
GO:0045732	GO:positive regulation of protein catabolic process	6/190	214/18670	0.0224687	0.0973746	0.0727046	APOE/CTSC/TREM2/OAZ1/NUPR1/BCAP31	6	GO	LAM1: Cluster2
GO:0006297	GO:nucleotide-excision repair, DNA gap filling	2/190	23/18670	0.0226534	0.0977802	0.0730075	POLD4/UBB	2	GO	LAM1: Cluster2
GO:0032799	GO:low-density lipoprotein receptor particle metabolic process	2/190	23/18670	0.0226534	0.0977802	0.0730075	APOE/PPARG	2	GO	LAM1: Cluster2
GO:0051882	GO:mitochondrial depolarization	2/190	23/18670	0.0226534	0.0977802	0.0730075	TSPO/IFI6	2	GO	LAM1: Cluster2
GO:0008037	GO:cell recognition	6/190	215/18670	0.0229253	0.0988211	0.0737847	LGALS3/BSG/COLEC12/TULP1/ALDOA/VDAC2	6	GO	LAM1: Cluster2
GO:0042136	GO:neurotransmitter biosynthetic process	4/190	106/18670	0.0231208	0.0995307	0.0743145	TSPO/GCHFR/ACP5/AIF1	4	GO	LAM1: Cluster2
GO:0043900	GO:regulation of multi-organism process	9/190	405/18670	0.0231605	0.0995686	0.0743428	GRN/INHBA/CD74/APOE/PYCARD/CYBA/LGALS9/CIB1/IFI27	9	GO	LAM1: Cluster2
GO:0033013	GO:tetrapyrrole metabolic process	3/190	60/18670	0.0232335	0.0997491	0.0744776	TSPO/BLVRA/HMOX1	3	GO	LAM1: Cluster2
hsa00100	KEGG:Steroid biosynthesis	5/105	20/8104	4.40738e-06	0.000969623	0.000867557	MSMO1/FDFT1/EBP/HSD17B7/DHCR24	5	KEGG	LAM1: Cluster3
hsa04610	KEGG:Complement and coagulation cascades	8/105	85/8104	1.28082e-05	0.0014089	0.00126059	SERPINA1/C4BPA/C2/TFPI/FGG/C3/F3/CPB2	8	KEGG	LAM1: Cluster3
hsa04964	KEGG:Proximal tubule bicarbonate reclamation	4/105	23/8104	0.000194935	0.0142952	0.0127904	ATP1B1/CA2/ATP1A1/AQP1	4	KEGG	LAM1: Cluster3
hsa05133	KEGG:Pertussis	6/105	76/8104	0.000429959	0.0236478	0.0211585	SFTPA1/SFTPA2/C4BPA/C2/MAPK13/C3	6	KEGG	LAM1: Cluster3
hsa04668	KEGG:TNF signaling pathway	7/105	112/8104	0.00059604	0.0262258	0.0234652	CXCL2/ICAM1/MAPK13/MAP2K3/TNFRSF1A/CCL20/NFKBIA	7	KEGG	LAM1: Cluster3
hsa04976	KEGG:Bile secretion	6/105	90/8104	0.00105821	0.0388011	0.0347167	EPHX1/ATP1B1/CA2/ATP1A1/AQP1/AQP4	6	KEGG	LAM1: Cluster3
hsa04657	KEGG:IL-17 signaling pathway	6/105	94/8104	0.00132742	0.041719	0.0373275	CXCL2/MAPK13/CCL20/NFKBIA/CSF3/LCN2	6	KEGG	LAM1: Cluster3
hsa05417	KEGG:Lipid and atherosclerosis	9/105	215/8104	0.00182419	0.0501653	0.0448847	CXCL2/ICAM1/MAPK13/CD36/MAP2K3/TNFRSF1A/NFKBIA/SOD2/XBP1	9	KEGG	LAM1: Cluster3
hsa05418	KEGG:Fluid shear stress and atherosclerosis	7/105	139/8104	0.00211187	0.0516235	0.0461895	MGST1/SDC4/ICAM1/MAPK13/TNFRSF1A/GSTA4/SDC2	7	KEGG	LAM1: Cluster3
hsa05144	KEGG:Malaria	4/105	50/8104	0.00387888	0.0853354	0.0763527	ICAM1/CD36/CSF3/SDC2	4	KEGG	LAM1: Cluster3
HALLMARK_CHOLESTEROL_HOMEOSTASIS	MSIGDB:CHOLESTEROL_HOMEOSTASIS	10/111	74/4384	1.33066e-05	0.00058549	0.000476236	TNFRSF12A/LGMN/ERRFI1/FDFT1/EBP/HSD17B7/FABP5/FASN/TMEM97/MAL2	10	MSIGDB HALLMARK	LAM1: Cluster3
HALLMARK_ESTROGEN_RESPONSE_EARLY	MSIGDB:ESTROGEN_RESPONSE_EARLY	15/111	200/4384	0.000127869	0.00187541	0.00152546	AQP3/MUC1/CLDN7/ELF3/TIPARP/MLPH/ABCA3/KRT18/CISH/KRT8/SFN/MED24/FDFT1/XBP1/FASN	15	MSIGDB HALLMARK	LAM1: Cluster3
HALLMARK_TNFA_SIGNALING_VIA_NFKB	MSIGDB:TNFA_SIGNALING_VIA_NFKB	15/111	200/4384	0.000127869	0.00187541	0.00152546	TGIF1/SDC4/CXCL2/TIPARP/CEBPD/PHLDA2/ICAM1/MAP2K3/DRAM1/CCL20/TSC22D1/BTG3/F3/NFKBIA/SOD2	15	MSIGDB HALLMARK	LAM1: Cluster3
HALLMARK_ESTROGEN_RESPONSE_LATE	MSIGDB:ESTROGEN_RESPONSE_LATE	14/111	200/4384	0.000447426	0.00492169	0.00400329	SERPINA1/DCXR/ABCA3/CISH/MAPK13/SFN/GALE/FDFT1/CA2/AGR2/BTG3/XBP1/FABP5/CACNA2D2	14	MSIGDB HALLMARK	LAM1: Cluster3
HALLMARK_UV_RESPONSE_UP	MSIGDB:UV_RESPONSE_UP	11/111	158/4384	0.00197207	0.0173542	0.0141158	AQP3/CXCL2/EPHX1/ICAM1/EPCAM/CA2/BTG3/NFKBIA/SOD2/AMD1/DDX21	11	MSIGDB HALLMARK	LAM1: Cluster3
HALLMARK_ANDROGEN_RESPONSE	MSIGDB:ANDROGEN_RESPONSE	8/111	100/4384	0.00352421	0.0258442	0.0210216	DBI/STEAP4/VAPA/KRT8/DNAJB9/TSC22D1/AZGP1/DHCR24	8	MSIGDB HALLMARK	LAM1: Cluster3
HALLMARK_COAGULATION	MSIGDB:COAGULATION	9/111	138/4384	0.00775177	0.0487254	0.0396331	CTSH/SERPINA1/C2/LGMN/FGG/C3/F3/CPB2/DUSP6	9	MSIGDB HALLMARK	LAM1: Cluster3
HALLMARK_FATTY_ACID_METABOLISM	MSIGDB:FATTY_ACID_METABOLISM	9/111	158/4384	0.0178348	0.0980912	0.0797871	EPHX1/ACSL4/CD36/CA2/ODC1/HSD17B7/HSD17B4/FASN/DHCR24	9	MSIGDB HALLMARK	LAM1: Cluster3
GO:0043129	GO:surfactant homeostasis	6/182	11/18670	3.5057e-10	9.8931e-07	8.62034e-07	SFTPA1/NAPSA/SFTPA2/SFTPD/CTSH/LPCAT1	6	GO	LAM1: Cluster3
GO:0048875	GO:chemical homeostasis within a tissue	6/182	13/18670	1.28117e-09	1.80773e-06	1.57516e-06	SFTPA1/NAPSA/SFTPA2/SFTPD/CTSH/LPCAT1	6	GO	LAM1: Cluster3
GO:0045861	GO:negative regulation of proteolysis	16/182	363/18670	5.64467e-07	0.000530975	0.000462665	SLPI/LAMP3/SERPINA1/C4BPA/SERPINB1/PRDX5/TFPI/WFDC2/SFN/PEBP1/SPINT2/C3/LRRK2/AQP1/CPB2/DHCR24	16	GO	LAM1: Cluster3
GO:0010951	GO:negative regulation of endopeptidase activity	13/182	250/18670	1.09348e-06	0.000742582	0.000647049	SLPI/LAMP3/SERPINA1/SERPINB1/PRDX5/TFPI/WFDC2/SFN/PEBP1/SPINT2/C3/AQP1/DHCR24	13	GO	LAM1: Cluster3
GO:0048871	GO:multicellular organismal homeostasis	18/182	485/18670	1.3157e-06	0.000742582	0.000647049	SFTPA1/NAPSA/SFTPA2/SFTPD/CTSH/AQP3/PIGR/CLDN18/LPCAT1/CD36/SFN/CA2/GADD45G/AQP1/FABP5/AZGP1/LCN2/AQP4	18	GO	LAM1: Cluster3
GO:0010466	GO:negative regulation of peptidase activity	13/182	262/18670	1.84462e-06	0.000867586	0.00075597	SLPI/LAMP3/SERPINA1/SERPINB1/PRDX5/TFPI/WFDC2/SFN/PEBP1/SPINT2/C3/AQP1/DHCR24	13	GO	LAM1: Cluster3
GO:0052548	GO:regulation of endopeptidase activity	16/182	425/18670	4.37646e-06	0.00176434	0.00153735	CTSH/SLPI/LAMP3/SERPINA1/SERPINB1/PRDX5/TFPI/WFDC2/LGMN/SFN/PEBP1/SPINT2/C3/F3/AQP1/DHCR24	16	GO	LAM1: Cluster3
GO:0019731	GO:antibacterial humoral response	6/182	46/18670	5.3544e-06	0.00188876	0.00164577	SFTPD/PGC/SLPI/DMBT1/H2BC12/PLA2G1B	6	GO	LAM1: Cluster3
GO:0052547	GO:regulation of peptidase activity	16/182	452/18670	9.49314e-06	0.00297663	0.00259368	CTSH/SLPI/LAMP3/SERPINA1/SERPINB1/PRDX5/TFPI/WFDC2/LGMN/SFN/PEBP1/SPINT2/C3/F3/AQP1/DHCR24	16	GO	LAM1: Cluster3
GO:0031638	GO:zymogen activation	6/182	53/18670	1.24025e-05	0.00349998	0.0030497	CTSH/ENO1/LGMN/FGG/CPB2/DHCR24	6	GO	LAM1: Cluster3
GO:0016485	GO:protein processing	13/182	328/18670	2.08514e-05	0.00502427	0.0043779	CTSH/C4BPA/C2/ENO1/LGMN/CPM/FGG/C3/LRRK2/F3/CPB2/METAP2/DHCR24	13	GO	LAM1: Cluster3
GO:0008202	GO:steroid metabolic process	13/182	331/18670	2.29353e-05	0.00502427	0.0043779	NPC2/MSMO1/TIPARP/LGMN/FDFT1/EBP/ATP1A1/HSD17B7/HSD17B6/HSD17B4/STARD3NL/FASN/DHCR24	13	GO	LAM1: Cluster3
GO:0006694	GO:steroid biosynthetic process	10/182	196/18670	2.31451e-05	0.00502427	0.0043779	MSMO1/FDFT1/EBP/ATP1A1/HSD17B7/HSD17B6/HSD17B4/STARD3NL/FASN/DHCR24	10	GO	LAM1: Cluster3
GO:0019730	GO:antimicrobial humoral response	8/182	122/18670	2.6141e-05	0.00526928	0.00459138	SFTPD/PGC/SLPI/CXCL2/DMBT1/H2BC12/PLA2G1B/LCN2	8	GO	LAM1: Cluster3
GO:0050764	GO:regulation of phagocytosis	7/182	98/18670	4.88601e-05	0.00919222	0.00800964	SFTPA1/SFTPA2/SFTPD/C4BPA/C2/CD36/C3	7	GO	LAM1: Cluster3
GO:0051346	GO:negative regulation of hydrolase activity	15/182	466/18670	5.42406e-05	0.00956669	0.00833593	SLPI/LAMP3/SERPINA1/SERPINB1/PRDX5/TFPI/WFDC2/SFN/PEBP1/SPINT2/C3/LRRK2/AQP1/DHCR24/PPP1R1B	15	GO	LAM1: Cluster3
GO:0050766	GO:positive regulation of phagocytosis	6/182	70/18670	6.1767e-05	0.0102533	0.00893422	SFTPA1/SFTPA2/SFTPD/C2/CD36/C3	6	GO	LAM1: Cluster3
GO:0001894	GO:tissue homeostasis	10/182	227/18670	8.01021e-05	0.0114992	0.0100198	SFTPA1/NAPSA/SFTPA2/SFTPD/CTSH/PIGR/CLDN18/LPCAT1/CA2/AZGP1	10	GO	LAM1: Cluster3
GO:0006695	GO:cholesterol biosynthetic process	6/182	75/18670	9.11182e-05	0.0114992	0.0100198	MSMO1/FDFT1/EBP/HSD17B7/FASN/DHCR24	6	GO	LAM1: Cluster3
GO:0002224	GO:toll-like receptor signaling pathway	8/182	146/18670	9.38177e-05	0.0114992	0.0100198	SFTPA1/SFTPA2/SFTPD/S100A14/LGMN/CD36/FGG/NFKBIA	8	GO	LAM1: Cluster3
GO:0031639	GO:plasminogen activation	4/182	25/18670	9.41632e-05	0.0114992	0.0100198	ENO1/FGG/CPB2/DHCR24	4	GO	LAM1: Cluster3
GO:1900101	GO:regulation of endoplasmic reticulum unfolded protein response	4/182	25/18670	9.41632e-05	0.0114992	0.0100198	PTPN2/DNAJB9/AGR2/XBP1	4	GO	LAM1: Cluster3
GO:1902653	GO:secondary alcohol biosynthetic process	6/182	76/18670	9.81361e-05	0.0114992	0.0100198	MSMO1/FDFT1/EBP/HSD17B7/FASN/DHCR24	6	GO	LAM1: Cluster3
GO:0032496	GO:response to lipopolysaccharide	12/182	330/18670	9.92541e-05	0.0114992	0.0100198	SLPI/MGST1/CXCL2/S100A14/ALPL/TFPI/ICAM1/CD36/NFKBIA/CSF3/XBP1/LCN2	12	GO	LAM1: Cluster3
GO:0006631	GO:fatty acid metabolic process	13/182	383/18670	0.000101871	0.0114992	0.0100198	MSMO1/ACSL4/MID1IP1/CD36/TNFRSF1A/C3/ALOX15B/ECHDC2/HSD17B4/XBP1/PLA2G1B/FABP5/FASN	13	GO	LAM1: Cluster3
GO:0002446	GO:neutrophil mediated immunity	15/182	499/18670	0.000116267	0.0126194	0.0109959	NPC2/CTSH/SLPI/MGST1/SERPINA1/SERPINB1/PIGR/LPCAT1/VAPA/CD36/C3/CHI3L1/PLA2G1B/FABP5/LCN2	15	GO	LAM1: Cluster3
GO:0071356	GO:cellular response to tumor necrosis factor	11/182	291/18670	0.000138325	0.0132393	0.011536	CLDN18/PTPN2/KRT18/TNFRSF12A/ICAM1/KRT8/TNFRSF1A/CCL20/CHI3L1/NFKBIA/LCN2	11	GO	LAM1: Cluster3
GO:0002221	GO:pattern recognition receptor signaling pathway	9/182	197/18670	0.000138863	0.0132393	0.011536	SFTPA1/SFTPA2/SFTPD/S100A14/LGMN/CD36/FGG/DMBT1/NFKBIA	9	GO	LAM1: Cluster3
GO:0016126	GO:sterol biosynthetic process	6/182	81/18670	0.000139945	0.0132393	0.011536	MSMO1/FDFT1/EBP/HSD17B7/FASN/DHCR24	6	GO	LAM1: Cluster3
GO:0002237	GO:response to molecule of bacterial origin	12/182	343/18670	0.000142558	0.0132393	0.011536	SLPI/MGST1/CXCL2/S100A14/ALPL/TFPI/ICAM1/CD36/NFKBIA/CSF3/XBP1/LCN2	12	GO	LAM1: Cluster3
GO:0051604	GO:protein maturation	13/182	397/18670	0.000145435	0.0132393	0.011536	CTSH/C4BPA/C2/ENO1/LGMN/CPM/FGG/C3/LRRK2/F3/CPB2/METAP2/DHCR24	13	GO	LAM1: Cluster3
GO:0006732	GO:coenzyme metabolic process	13/182	403/18670	0.000168535	0.0148627	0.0129506	DBI/MTHFS/CYB5A/DCXR/NNMT/MBIP/ENO1/ACSL4/FOLR1/HSD17B4/FASN/AMD1/QDPR	13	GO	LAM1: Cluster3
GO:0019755	GO:one-carbon compound transport	3/182	12/18670	0.000187897	0.0160681	0.0140009	AQP3/CA2/AQP1	3	GO	LAM1: Cluster3
GO:0006959	GO:humoral immune response	12/182	356/18670	0.000201145	0.016695	0.0145472	SFTPD/PGC/SLPI/CXCL2/C4BPA/C2/DMBT1/C3/H2BC12/CPB2/PLA2G1B/LCN2	12	GO	LAM1: Cluster3
GO:1900103	GO:positive regulation of endoplasmic reticulum unfolded protein response	3/182	13/18670	0.000242517	0.0195538	0.0170382	PTPN2/AGR2/XBP1	3	GO	LAM1: Cluster3
GO:0034612	GO:response to tumor necrosis factor	11/182	312/18670	0.000252934	0.0198272	0.0172764	CLDN18/PTPN2/KRT18/TNFRSF12A/ICAM1/KRT8/TNFRSF1A/CCL20/CHI3L1/NFKBIA/LCN2	11	GO	LAM1: Cluster3
GO:0043312	GO:neutrophil degranulation	14/182	485/18670	0.000297646	0.0227016	0.019781	NPC2/CTSH/SLPI/MGST1/SERPINA1/SERPINB1/PIGR/LPCAT1/VAPA/CD36/C3/CHI3L1/FABP5/LCN2	14	GO	LAM1: Cluster3
GO:0035358	GO:regulation of peroxisome proliferator activated receptor signaling pathway	3/182	14/18670	0.000306447	0.0227578	0.01983	CITED2/ALOX15B/FABP5	3	GO	LAM1: Cluster3
GO:0002283	GO:neutrophil activation involved in immune response	14/182	488/18670	0.000316743	0.0229192	0.0199706	NPC2/CTSH/SLPI/MGST1/SERPINA1/SERPINB1/PIGR/LPCAT1/VAPA/CD36/C3/CHI3L1/FABP5/LCN2	14	GO	LAM1: Cluster3
GO:0032103	GO:positive regulation of response to external stimulus	11/182	323/18670	0.000339776	0.0236699	0.0206247	PGC/CXCL17/S100A14/LGMN/MAPK13/TNFRSF1A/C3/LRRK2/F3/NFKBIA/CPB2	11	GO	LAM1: Cluster3
GO:0007585	GO:respiratory gaseous exchange	5/182	62/18670	0.000343892	0.0236699	0.0206247	SFTPC/SFTPA1/SFTPB/SFTPA2/SFTPD	5	GO	LAM1: Cluster3
GO:0071347	GO:cellular response to interleukin-1	8/182	179/18670	0.000378574	0.0254366	0.0221641	TFPI/ICAM1/MAPK13/FGG/CCL20/CHI3L1/NFKBIA/LCN2	8	GO	LAM1: Cluster3
GO:0042119	GO:neutrophil activation	14/182	498/18670	0.000388191	0.0254762	0.0221986	NPC2/CTSH/SLPI/MGST1/SERPINA1/SERPINB1/PIGR/LPCAT1/VAPA/CD36/C3/CHI3L1/FABP5/LCN2	14	GO	LAM1: Cluster3
GO:0042742	GO:defense response to bacterium	11/182	330/18670	0.000407165	0.0261141	0.0227545	SFTPD/PGC/SLPI/S100A14/CD36/TNFRSF1A/DMBT1/H2BC12/CCL20/PLA2G1B/LCN2	11	GO	LAM1: Cluster3
GO:0061041	GO:regulation of wound healing	7/182	148/18670	0.000628011	0.0393833	0.0343166	TFPI/TNFRSF12A/CD36/FGG/F3/CPB2/XBP1	7	GO	LAM1: Cluster3
GO:0045056	GO:transcytosis	3/182	18/18670	0.000667538	0.0399836	0.0348397	MFSD2A/PIGR/MAL2	3	GO	LAM1: Cluster3
GO:0090026	GO:positive regulation of monocyte chemotaxis	3/182	18/18670	0.000667538	0.0399836	0.0348397	CXCL17/S100A14/LGMN	3	GO	LAM1: Cluster3
GO:0008203	GO:cholesterol metabolic process	7/182	150/18670	0.00068009	0.0399836	0.0348397	NPC2/MSMO1/FDFT1/EBP/HSD17B7/FASN/DHCR24	7	GO	LAM1: Cluster3
GO:0002758	GO:innate immune response-activating signal transduction	10/182	298/18670	0.000707024	0.040006	0.0348592	SFTPA1/SFTPA2/SFTPD/MUC1/S100A14/LGMN/CD36/FGG/DMBT1/NFKBIA	10	GO	LAM1: Cluster3
GO:0019216	GO:regulation of lipid metabolic process	12/182	410/18670	0.000713426	0.040006	0.0348592	NPC2/SOCS2/CISH/LPCAT1/MID1IP1/CD36/TNFRSF1A/FDFT1/C3/ATP1A1/FABP5/FASN	12	GO	LAM1: Cluster3
GO:0097237	GO:cellular response to toxic substance	9/182	247/18670	0.000729802	0.040006	0.0348592	MGST1/PRDX5/MAPK13/CD36/LRRK2/SOD2/AQP1/LCN2/ADIRF	9	GO	LAM1: Cluster3
GO:0046890	GO:regulation of lipid biosynthetic process	8/182	198/18670	0.000737177	0.040006	0.0348592	LPCAT1/MID1IP1/TNFRSF1A/FDFT1/C3/ATP1A1/FABP5/FASN	8	GO	LAM1: Cluster3
GO:0045807	GO:positive regulation of endocytosis	7/182	153/18670	0.000764569	0.0407097	0.0354724	SFTPA1/SFTPA2/SFTPD/C2/CD36/C3/LRRK2	7	GO	LAM1: Cluster3
GO:0006833	GO:water transport	3/182	19/18670	0.000787039	0.0411301	0.0358387	AQP3/AQP1/AQP4	3	GO	LAM1: Cluster3
GO:1902652	GO:secondary alcohol metabolic process	7/182	155/18670	0.000825354	0.0423482	0.0369	NPC2/MSMO1/FDFT1/EBP/HSD17B7/FASN/DHCR24	7	GO	LAM1: Cluster3
GO:0071222	GO:cellular response to lipopolysaccharide	8/182	205/18670	0.000923618	0.0457272	0.0398443	CXCL2/TFPI/ICAM1/CD36/NFKBIA/CSF3/XBP1/LCN2	8	GO	LAM1: Cluster3
GO:0097164	GO:ammonium ion metabolic process	8/182	205/18670	0.000923618	0.0457272	0.0398443	DBI/SGMS2/MFSD2A/LPCAT1/ODC1/PLA2G1B/FABP5/AMD1	8	GO	LAM1: Cluster3
GO:0002064	GO:epithelial cell development	8/182	207/18670	0.000983307	0.0470321	0.0409813	ICAM1/SFN/TNFRSF1A/SPINT2/HSD17B4/XBP1/FASN/KLF5	8	GO	LAM1: Cluster3
GO:0070555	GO:response to interleukin-1	8/182	207/18670	0.000983307	0.0470321	0.0409813	TFPI/ICAM1/MAPK13/FGG/CCL20/CHI3L1/NFKBIA/LCN2	8	GO	LAM1: Cluster3
GO:0010883	GO:regulation of lipid storage	4/182	46/18670	0.00103573	0.0483143	0.0420986	PTPN2/CD36/C3/NFKBIA	4	GO	LAM1: Cluster3
GO:0030193	GO:regulation of blood coagulation	5/182	79/18670	0.0010484	0.0483143	0.0420986	TFPI/CD36/FGG/F3/CPB2	5	GO	LAM1: Cluster3
GO:0035357	GO:peroxisome proliferator activated receptor signaling pathway	3/182	21/18670	0.00106488	0.0483143	0.0420986	CITED2/ALOX15B/FABP5	3	GO	LAM1: Cluster3
GO:0097529	GO:myeloid leukocyte migration	8/182	210/18670	0.0010786	0.0483143	0.0420986	SFTPD/CXCL17/CXCL2/CSF3R/S100A14/LGMN/CCL20/PLA2G1B	8	GO	LAM1: Cluster3
GO:1900046	GO:regulation of hemostasis	5/182	80/18670	0.00110959	0.0489259	0.0426315	TFPI/CD36/FGG/F3/CPB2	5	GO	LAM1: Cluster3
GO:0071219	GO:cellular response to molecule of bacterial origin	8/182	212/18670	0.00114613	0.0497595	0.0433579	CXCL2/TFPI/ICAM1/CD36/NFKBIA/CSF3/XBP1/LCN2	8	GO	LAM1: Cluster3
GO:0002218	GO:activation of innate immune response	10/182	319/18670	0.00118501	0.0506682	0.0441497	SFTPA1/SFTPA2/SFTPD/MUC1/S100A14/LGMN/CD36/FGG/DMBT1/NFKBIA	10	GO	LAM1: Cluster3
GO:0016125	GO:sterol metabolic process	7/182	166/18670	0.00123123	0.0510052	0.0444434	NPC2/MSMO1/FDFT1/EBP/HSD17B7/FASN/DHCR24	7	GO	LAM1: Cluster3
GO:0050900	GO:leukocyte migration	13/182	499/18670	0.00125457	0.0510052	0.0444434	SFTPD/CXCL17/SDC4/CXCL2/CSF3R/S100A14/LGMN/ICAM1/ATP1B1/EPCAM/CCL20/SDC2/PLA2G1B	13	GO	LAM1: Cluster3
GO:0033209	GO:tumor necrosis factor-mediated signaling pathway	7/182	167/18670	0.00127472	0.0510052	0.0444434	CLDN18/PTPN2/KRT18/TNFRSF12A/KRT8/TNFRSF1A/NFKBIA	7	GO	LAM1: Cluster3
GO:1901568	GO:fatty acid derivative metabolic process	7/182	167/18670	0.00127472	0.0510052	0.0444434	ACSL4/TNFRSF1A/ALOX15B/HSD17B4/PLA2G1B/FABP5/FASN	7	GO	LAM1: Cluster3
GO:0071621	GO:granulocyte chemotaxis	6/182	123/18670	0.001309	0.0510052	0.0444434	CXCL17/CXCL2/CSF3R/S100A14/CCL20/PLA2G1B	6	GO	LAM1: Cluster3
GO:0046470	GO:phosphatidylcholine metabolic process	5/182	83/18670	0.00130906	0.0510052	0.0444434	DBI/MFSD2A/LPCAT1/PLA2G1B/FABP5	5	GO	LAM1: Cluster3
GO:0034614	GO:cellular response to reactive oxygen species	7/182	168/18670	0.00131941	0.0510052	0.0444434	PRDX5/MAPK13/CD36/LRRK2/SOD2/AQP1/LCN2	7	GO	LAM1: Cluster3
GO:0043154	GO:negative regulation of cysteine-type endopeptidase activity involved in apoptotic process	5/182	84/18670	0.00138108	0.0512817	0.0446843	LAMP3/PRDX5/SFN/AQP1/DHCR24	5	GO	LAM1: Cluster3
GO:0050818	GO:regulation of coagulation	5/182	84/18670	0.00138108	0.0512817	0.0446843	TFPI/CD36/FGG/F3/CPB2	5	GO	LAM1: Cluster3
GO:1905897	GO:regulation of response to endoplasmic reticulum stress	5/182	84/18670	0.00138108	0.0512817	0.0446843	PTPN2/DNAJB9/AGR2/LRRK2/XBP1	5	GO	LAM1: Cluster3
GO:0070741	GO:response to interleukin-6	4/182	50/18670	0.00141816	0.05194	0.0452579	PTPN2/ICAM1/FGG/CHI3L1	4	GO	LAM1: Cluster3
GO:1901653	GO:cellular response to peptide	11/182	385/18670	0.00143562	0.05194	0.0452579	SOCS2/PTPN2/CISH/LGMN/ICAM1/CD36/ERRFI1/CA2/XBP1/PLA2G1B/KLF5	11	GO	LAM1: Cluster3
GO:0030324	GO:lung development	7/182	172/18670	0.00151056	0.0539596	0.0470176	SFTPD/CTSH/ERRFI1/AGR2/NKX2-1/HHIP/CHI3L1	7	GO	LAM1: Cluster3
GO:0071677	GO:positive regulation of mononuclear cell migration	3/182	24/18670	0.00158612	0.0559504	0.0487524	CXCL17/S100A14/LGMN	3	GO	LAM1: Cluster3
GO:0030595	GO:leukocyte chemotaxis	8/182	224/18670	0.00162551	0.056632	0.0493463	SFTPD/CXCL17/CXCL2/CSF3R/S100A14/LGMN/CCL20/PLA2G1B	8	GO	LAM1: Cluster3
GO:0046165	GO:alcohol biosynthetic process	7/182	175/18670	0.00166759	0.0567906	0.0494845	MSMO1/FDFT1/EBP/HSD17B7/FASN/DHCR24/QDPR	7	GO	LAM1: Cluster3
GO:0034754	GO:cellular hormone metabolic process	6/182	129/18670	0.00167031	0.0567906	0.0494845	SDR16C5/TIPARP/HSD17B7/HSD17B6/HSD17B4/STARD3NL	6	GO	LAM1: Cluster3
GO:0030323	GO:respiratory tube development	7/182	176/18670	0.00172266	0.0578732	0.0504277	SFTPD/CTSH/ERRFI1/AGR2/NKX2-1/HHIP/CHI3L1	7	GO	LAM1: Cluster3
GO:1901185	GO:negative regulation of ERBB signaling pathway	4/182	53/18670	0.00176278	0.0585243	0.0509951	PTPN2/LGMN/ERRFI1/GPRC5A	4	GO	LAM1: Cluster3
GO:0090025	GO:regulation of monocyte chemotaxis	3/182	25/18670	0.00178957	0.0587229	0.0511681	CXCL17/S100A14/LGMN	3	GO	LAM1: Cluster3
GO:1903034	GO:regulation of response to wounding	7/182	179/18670	0.00189639	0.0615129	0.0535992	TFPI/TNFRSF12A/CD36/FGG/F3/CPB2/XBP1	7	GO	LAM1: Cluster3
GO:0010876	GO:lipid localization	11/182	400/18670	0.00193923	0.0621876	0.0541871	SFTPA1/NPC2/MFSD2A/ABCA3/PTPN2/ACSL4/MID1IP1/CD36/C3/NFKBIA/PLA2G1B	11	GO	LAM1: Cluster3
GO:0030194	GO:positive regulation of blood coagulation	3/182	26/18670	0.00200859	0.0622883	0.0542748	CD36/F3/CPB2	3	GO	LAM1: Cluster3
GO:0042044	GO:fluid transport	3/182	26/18670	0.00200859	0.0622883	0.0542748	AQP3/AQP1/AQP4	3	GO	LAM1: Cluster3
GO:1900048	GO:positive regulation of hemostasis	3/182	26/18670	0.00200859	0.0622883	0.0542748	CD36/F3/CPB2	3	GO	LAM1: Cluster3
GO:2000117	GO:negative regulation of cysteine-type endopeptidase activity	5/182	92/18670	0.00206684	0.0633981	0.0552419	LAMP3/PRDX5/SFN/AQP1/DHCR24	5	GO	LAM1: Cluster3
GO:0007162	GO:negative regulation of cell adhesion	9/182	289/18670	0.00216651	0.0641818	0.0559248	SFTPD/SDC4/MUC1/PTPN2/EPCAM/FGG/TACSTD2/SPINT2/RND1	9	GO	LAM1: Cluster3
GO:1901184	GO:regulation of ERBB signaling pathway	5/182	93/18670	0.00216731	0.0641818	0.0559248	PTPN2/LGMN/ERRFI1/GPRC5A/AGR2	5	GO	LAM1: Cluster3
GO:2001233	GO:regulation of apoptotic signaling pathway	11/182	406/18670	0.0021773	0.0641818	0.0559248	CTSH/MUC1/PTPN2/ENO1/TNFRSF12A/ICAM1/FGG/SFN/LRRK2/SOD2/XBP1	11	GO	LAM1: Cluster3
GO:0036151	GO:phosphatidylcholine acyl-chain remodeling	3/182	27/18670	0.00224358	0.0641818	0.0559248	DBI/LPCAT1/PLA2G1B	3	GO	LAM1: Cluster3
GO:0050820	GO:positive regulation of coagulation	3/182	27/18670	0.00224358	0.0641818	0.0559248	CD36/F3/CPB2	3	GO	LAM1: Cluster3
GO:0072378	GO:blood coagulation, fibrin clot formation	3/182	27/18670	0.00224358	0.0641818	0.0559248	TFPI/FGG/F3	3	GO	LAM1: Cluster3
GO:0071216	GO:cellular response to biotic stimulus	8/182	236/18670	0.00225159	0.0641818	0.0559248	CXCL2/TFPI/ICAM1/CD36/NFKBIA/CSF3/XBP1/LCN2	8	GO	LAM1: Cluster3
GO:2000116	GO:regulation of cysteine-type endopeptidase activity	8/182	239/18670	0.00243438	0.0684355	0.0596312	CTSH/LAMP3/PRDX5/LGMN/SFN/F3/AQP1/DHCR24	8	GO	LAM1: Cluster3
GO:0097327	GO:response to antineoplastic agent	5/182	96/18670	0.00249011	0.0684355	0.0596312	ICAM1/MAPK13/ERRFI1/AQP1/ADIRF	5	GO	LAM1: Cluster3
GO:0008209	GO:androgen metabolic process	3/182	28/18670	0.00249493	0.0684355	0.0596312	TIPARP/HSD17B6/HSD17B4	3	GO	LAM1: Cluster3
GO:0050663	GO:cytokine secretion	8/182	240/18670	0.00249782	0.0684355	0.0596312	SERPINB1/ANXA4/CD36/ITGB6/LRRK2/CHI3L1/ALOX15B/XBP1	8	GO	LAM1: Cluster3
GO:0015908	GO:fatty acid transport	5/182	97/18670	0.00260508	0.0702823	0.0612405	MFSD2A/ACSL4/MID1IP1/CD36/PLA2G1B	5	GO	LAM1: Cluster3
GO:0097530	GO:granulocyte migration	6/182	141/18670	0.00261504	0.0702823	0.0612405	CXCL17/CXCL2/CSF3R/S100A14/CCL20/PLA2G1B	6	GO	LAM1: Cluster3
GO:0038127	GO:ERBB signaling pathway	6/182	142/18670	0.00270877	0.0715343	0.0623314	PIGR/PTPN2/LGMN/ERRFI1/GPRC5A/AGR2	6	GO	LAM1: Cluster3
GO:2001243	GO:negative regulation of intrinsic apoptotic signaling pathway	5/182	98/18670	0.00272384	0.0715343	0.0623314	MUC1/ENO1/LRRK2/SOD2/XBP1	5	GO	LAM1: Cluster3
GO:0060441	GO:epithelial tube branching involved in lung morphogenesis	3/182	29/18670	0.00276302	0.0715343	0.0623314	CTSH/NKX2-1/HHIP	3	GO	LAM1: Cluster3
GO:0061099	GO:negative regulation of protein tyrosine kinase activity	3/182	29/18670	0.00276302	0.0715343	0.0623314	PTPN2/ERRFI1/GPRC5A	3	GO	LAM1: Cluster3
GO:0034599	GO:cellular response to oxidative stress	9/182	302/18670	0.00290797	0.0745213	0.0649341	MGST1/PRDX5/MAPK13/CD36/LRRK2/SOD2/AQP1/LCN2/NCOA7	9	GO	LAM1: Cluster3
GO:0045604	GO:regulation of epidermal cell differentiation	4/182	61/18670	0.00295762	0.0745213	0.0649341	AQP3/ERRFI1/SFN/ALOX15B	4	GO	LAM1: Cluster3
GO:0090303	GO:positive regulation of wound healing	4/182	61/18670	0.00295762	0.0745213	0.0649341	CD36/F3/CPB2/XBP1	4	GO	LAM1: Cluster3
GO:0010743	GO:regulation of macrophage derived foam cell differentiation	3/182	30/18670	0.0030482	0.0754563	0.0657488	CD36/NFKBIA/ALOX15B	3	GO	LAM1: Cluster3
GO:0071549	GO:cellular response to dexamethasone stimulus	3/182	30/18670	0.0030482	0.0754563	0.0657488	ICAM1/ERRFI1/AQP1	3	GO	LAM1: Cluster3
GO:0008643	GO:carbohydrate transport	6/182	148/18670	0.00332506	0.0804097	0.070065	AQP3/MFSD2A/C3/AQP1/PLA2G1B/FABP5	6	GO	LAM1: Cluster3
GO:0060541	GO:respiratory system development	7/182	198/18670	0.00333378	0.0804097	0.070065	SFTPD/CTSH/ERRFI1/AGR2/NKX2-1/HHIP/CHI3L1	7	GO	LAM1: Cluster3
GO:0072376	GO:protein activation cascade	7/182	198/18670	0.00333378	0.0804097	0.070065	C4BPA/C2/TFPI/FGG/C3/F3/CPB2	7	GO	LAM1: Cluster3
GO:0048608	GO:reproductive structure development	11/182	431/18670	0.00343841	0.0822305	0.0716515	CITED2/MGST1/TIPARP/PHLDA2/ICAM1/KRT8/SPINT2/NKX2-1/ALOX15B/HSD17B4/DHCR24	11	GO	LAM1: Cluster3
GO:0045600	GO:positive regulation of fat cell differentiation	4/182	64/18670	0.00352059	0.0834882	0.0727474	WIF1/XBP1/KLF5/ADIRF	4	GO	LAM1: Cluster3
GO:0061458	GO:reproductive system development	11/182	434/18670	0.00362271	0.0835494	0.0728007	CITED2/MGST1/TIPARP/PHLDA2/ICAM1/KRT8/SPINT2/NKX2-1/ALOX15B/HSD17B4/DHCR24	11	GO	LAM1: Cluster3
GO:0008210	GO:estrogen metabolic process	3/182	32/18670	0.0036712	0.0835494	0.0728007	TIPARP/HSD17B7/HSD17B4	3	GO	LAM1: Cluster3
GO:0070207	GO:protein homotrimerization	3/182	32/18670	0.0036712	0.0835494	0.0728007	MGST1/STEAP4/LCN2	3	GO	LAM1: Cluster3
GO:0071353	GO:cellular response to interleukin-4	3/182	32/18670	0.0036712	0.0835494	0.0728007	PTPN2/XBP1/FASN	3	GO	LAM1: Cluster3
GO:1902235	GO:regulation of endoplasmic reticulum stress-induced intrinsic apoptotic signaling pathway	3/182	32/18670	0.0036712	0.0835494	0.0728007	PTPN2/LRRK2/XBP1	3	GO	LAM1: Cluster3
GO:0002548	GO:monocyte chemotaxis	4/182	65/18670	0.00372333	0.0840579	0.0732438	CXCL17/S100A14/LGMN/CCL20	4	GO	LAM1: Cluster3
GO:0060249	GO:anatomical structure homeostasis	11/182	437/18670	0.00381485	0.0854406	0.0744486	SFTPA1/NAPSA/SFTPA2/SFTPD/CTSH/FGGY/PIGR/CLDN18/LPCAT1/CA2/AZGP1	11	GO	LAM1: Cluster3
GO:0070371	GO:ERK1 and ERK2 cascade	9/182	317/18670	0.00399884	0.0870238	0.0758281	CTSH/PTPN2/ICAM1/CD36/FGG/ERRFI1/CCL20/CHI3L1/DUSP6	9	GO	LAM1: Cluster3
GO:0061140	GO:lung secretory cell differentiation	2/182	10/18670	0.00403973	0.0870238	0.0758281	AGR2/NKX2-1	2	GO	LAM1: Cluster3
GO:0090557	GO:establishment of endothelial intestinal barrier	2/182	10/18670	0.00403973	0.0870238	0.0758281	ICAM1/FASN	2	GO	LAM1: Cluster3
GO:1903897	GO:regulation of PERK-mediated unfolded protein response	2/182	10/18670	0.00403973	0.0870238	0.0758281	PTPN2/AGR2	2	GO	LAM1: Cluster3
GO:2000425	GO:regulation of apoptotic cell clearance	2/182	10/18670	0.00403973	0.0870238	0.0758281	C2/C3	2	GO	LAM1: Cluster3
GO:0030004	GO:cellular monovalent inorganic cation homeostasis	5/182	108/18670	0.00413642	0.0884317	0.0770549	ATP1B1/CA2/LRRK2/ATP1A1/TMEM165	5	GO	LAM1: Cluster3
GO:0045089	GO:positive regulation of innate immune response	10/182	381/18670	0.0042838	0.0901963	0.0785925	SFTPA1/SFTPA2/SFTPD/MUC1/S100A14/LGMN/CD36/FGG/DMBT1/NFKBIA	10	GO	LAM1: Cluster3
GO:0042558	GO:pteridine-containing compound metabolic process	3/182	34/18670	0.00436649	0.0901963	0.0785925	MTHFS/FOLR1/QDPR	3	GO	LAM1: Cluster3
GO:0070670	GO:response to interleukin-4	3/182	34/18670	0.00436649	0.0901963	0.0785925	PTPN2/XBP1/FASN	3	GO	LAM1: Cluster3
GO:0019915	GO:lipid storage	4/182	68/18670	0.00437877	0.0901963	0.0785925	PTPN2/CD36/C3/NFKBIA	4	GO	LAM1: Cluster3
GO:0050891	GO:multicellular organismal water homeostasis	4/182	68/18670	0.00437877	0.0901963	0.0785925	AQP3/SFN/AQP1/AQP4	4	GO	LAM1: Cluster3
GO:0046661	GO:male sex differentiation	6/182	160/18670	0.00486354	0.0968144	0.0843591	CITED2/MGST1/ICAM1/NKX2-1/HSD17B4/DHCR24	6	GO	LAM1: Cluster3
GO:0045088	GO:regulation of innate immune response	11/182	452/18670	0.00490153	0.0968144	0.0843591	SFTPA1/SFTPA2/SFTPD/MUC1/PTPN2/S100A14/LGMN/CD36/FGG/DMBT1/NFKBIA	11	GO	LAM1: Cluster3
GO:0015791	GO:polyol transport	2/182	11/18670	0.0049059	0.0968144	0.0843591	AQP3/AQP1	2	GO	LAM1: Cluster3
GO:0033327	GO:Leydig cell differentiation	2/182	11/18670	0.0049059	0.0968144	0.0843591	MGST1/NKX2-1	2	GO	LAM1: Cluster3
GO:0040015	GO:negative regulation of multicellular organism growth	2/182	11/18670	0.0049059	0.0968144	0.0843591	SOCS2/LGMN	2	GO	LAM1: Cluster3
GO:0070278	GO:extracellular matrix constituent secretion	2/182	11/18670	0.0049059	0.0968144	0.0843591	TNFRSF1A/CPB2	2	GO	LAM1: Cluster3
GO:0002385	GO:mucosal immune response	3/182	36/18670	0.00513641	0.0968873	0.0844227	PIGR/H2BC12/PLA2G1B	3	GO	LAM1: Cluster3
GO:0003091	GO:renal water homeostasis	3/182	36/18670	0.00513641	0.0968873	0.0844227	AQP3/AQP1/AQP4	3	GO	LAM1: Cluster3
GO:0010742	GO:macrophage derived foam cell differentiation	3/182	36/18670	0.00513641	0.0968873	0.0844227	CD36/NFKBIA/ALOX15B	3	GO	LAM1: Cluster3
GO:0046627	GO:negative regulation of insulin receptor signaling pathway	3/182	36/18670	0.00513641	0.0968873	0.0844227	SOCS2/PTPN2/CISH	3	GO	LAM1: Cluster3
GO:0060428	GO:lung epithelium development	3/182	36/18670	0.00513641	0.0968873	0.0844227	ERRFI1/AGR2/NKX2-1	3	GO	LAM1: Cluster3
GO:0090077	GO:foam cell differentiation	3/182	36/18670	0.00513641	0.0968873	0.0844227	CD36/NFKBIA/ALOX15B	3	GO	LAM1: Cluster3
GO:0001655	GO:urogenital system development	9/182	330/18670	0.00518309	0.0968873	0.0844227	CTSH/SDC4/TIPARP/EPCAM/TACSTD2/CA2/LRRK2/ODC1/ALOX15B	9	GO	LAM1: Cluster3
GO:1901617	GO:organic hydroxy compound biosynthetic process	8/182	271/18670	0.00519633	0.0968873	0.0844227	MSMO1/FDFT1/EBP/HSD17B7/HSD17B4/FASN/DHCR24/QDPR	8	GO	LAM1: Cluster3
GO:0043281	GO:regulation of cysteine-type endopeptidase activity involved in apoptotic process	7/182	215/18670	0.00521859	0.0968873	0.0844227	CTSH/LAMP3/PRDX5/SFN/F3/AQP1/DHCR24	7	GO	LAM1: Cluster3
hsa04145	KEGG:Phagosome	21/126	152/8104	1.089e-14	2.43936e-12	2.12069e-12	MARCO/HLA-DPA1/HLA-DRA/HLA-DRB1/COLEC12/HLA-DOA/HLA-DMA/HLA-DPB1/HLA-DRB5/OLR1/TFRC/MSR1/HLA-DQB1/CANX/HLA-DQA1/CTSS/FCGR2A/RAB7A/HLA-DMB/FCGR3A/STX12	21	KEGG	LAM1: Cluster4
hsa05150	KEGG:Staphylococcus aureus infection	17/126	96/8104	6.72717e-14	7.53443e-12	6.55014e-12	C1QA/C1QB/C1QC/HLA-DPA1/HLA-DRA/HLA-DRB1/HLA-DOA/HLA-DMA/HLA-DPB1/HLA-DRB5/HLA-DQB1/HLA-DQA1/FCGR2A/HLA-DMB/FCGR3A/C2/CFD	17	KEGG	LAM1: Cluster4
hsa05310	KEGG:Asthma	11/126	31/8104	5.37153e-13	4.01074e-11	3.48678e-11	HLA-DPA1/HLA-DRA/HLA-DRB1/HLA-DOA/HLA-DMA/HLA-DPB1/HLA-DRB5/FCER1G/HLA-DQB1/HLA-DQA1/HLA-DMB	11	KEGG	LAM1: Cluster4
hsa04612	KEGG:Antigen processing and presentation	14/126	78/8104	1.02528e-11	5.74154e-10	4.99147e-10	CD74/HLA-DPA1/HLA-DRA/HLA-DRB1/HLA-DOA/HLA-DMA/HLA-DPB1/HLA-DRB5/HLA-DQB1/CANX/HLA-DQA1/CTSS/CTSB/HLA-DMB	14	KEGG	LAM1: Cluster4
hsa05330	KEGG:Allograft rejection	10/126	38/8104	1.88412e-10	8.22149e-09	7.14744e-09	HLA-DPA1/HLA-DRA/HLA-DRB1/HLA-DOA/HLA-DMA/HLA-DPB1/HLA-DRB5/HLA-DQB1/HLA-DQA1/HLA-DMB	10	KEGG	LAM1: Cluster4
hsa05322	KEGG:Systemic lupus erythematosus	16/126	136/8104	2.42464e-10	8.22149e-09	7.14744e-09	C1QA/C1QB/C1QC/HLA-DPA1/HLA-DRA/HLA-DRB1/HLA-DOA/HLA-DMA/HLA-DPB1/HLA-DRB5/HLA-DQB1/HLA-DQA1/FCGR2A/HLA-DMB/FCGR3A/C2	16	KEGG	LAM1: Cluster4
hsa05152	KEGG:Tuberculosis	18/126	180/8104	2.56922e-10	8.22149e-09	7.14744e-09	CD74/HLA-DPA1/HLA-DRA/HLA-DRB1/CTSD/HLA-DOA/CEBPB/HLA-DMA/HLA-DPB1/HLA-DRB5/FCER1G/HLA-DQB1/HLA-DQA1/CTSS/FCGR2A/RAB7A/HLA-DMB/FCGR3A	18	KEGG	LAM1: Cluster4
hsa05332	KEGG:Graft-versus-host disease	10/126	42/8104	5.56484e-10	1.55816e-08	1.3546e-08	HLA-DPA1/HLA-DRA/HLA-DRB1/HLA-DOA/HLA-DMA/HLA-DPB1/HLA-DRB5/HLA-DQB1/HLA-DQA1/HLA-DMB	10	KEGG	LAM1: Cluster4
hsa04940	KEGG:Type I diabetes mellitus	10/126	43/8104	7.15669e-10	1.78122e-08	1.54852e-08	HLA-DPA1/HLA-DRA/HLA-DRB1/HLA-DOA/HLA-DMA/HLA-DPB1/HLA-DRB5/HLA-DQB1/HLA-DQA1/HLA-DMB	10	KEGG	LAM1: Cluster4
hsa05416	KEGG:Viral myocarditis	11/126	60/8104	1.48607e-09	3.06527e-08	2.66483e-08	HLA-DPA1/HLA-DRA/HLA-DRB1/HLA-DOA/HLA-DMA/HLA-DPB1/HLA-DRB5/HLA-DQB1/HLA-DQA1/HLA-DMB/ABL2	11	KEGG	LAM1: Cluster4
hsa05323	KEGG:Rheumatoid arthritis	13/126	93/8104	1.50527e-09	3.06527e-08	2.66483e-08	ACP5/HLA-DPA1/HLA-DRA/HLA-DRB1/HLA-DOA/HLA-DMA/HLA-DPB1/HLA-DRB5/CXCL3/HLA-DQB1/HLA-DQA1/HLA-DMB/CXCL5	13	KEGG	LAM1: Cluster4
hsa05140	KEGG:Leishmaniasis	12/126	77/8104	1.83738e-09	3.42978e-08	2.98171e-08	HLA-DPA1/HLA-DRA/HLA-DRB1/HLA-DOA/HLA-DMA/HLA-DPB1/HLA-DRB5/HLA-DQB1/HLA-DQA1/FCGR2A/HLA-DMB/FCGR3A	12	KEGG	LAM1: Cluster4
hsa04672	KEGG:Intestinal immune network for IgA production	10/126	49/8104	2.8353e-09	4.88544e-08	4.24721e-08	HLA-DPA1/HLA-DRA/HLA-DRB1/HLA-DOA/HLA-DMA/HLA-DPB1/HLA-DRB5/HLA-DQB1/HLA-DQA1/HLA-DMB	10	KEGG	LAM1: Cluster4
hsa05320	KEGG:Autoimmune thyroid disease	10/126	53/8104	6.38377e-09	1.0214e-07	8.87968e-08	HLA-DPA1/HLA-DRA/HLA-DRB1/HLA-DOA/HLA-DMA/HLA-DPB1/HLA-DRB5/HLA-DQB1/HLA-DQA1/HLA-DMB	10	KEGG	LAM1: Cluster4
[truncated: 7,152 more rows]

## Sheet: LAM2joint Clusterwise Marker Ge
Cluster	Top200_Genes
WT: Cluster0	FTL,C1QA,C1QB,APOC1,ALDH2,FABP4,SERPINA1,TSPO,C1QC,S100A11,C19orf59,MGST3,MARCO,HLA-DRB1,HLA-DQB1,VSIG4,HLA-DRA,GRN,SERPING1,CD74,ACP5,TREM1,TYROBP,FTH1,FOLR3,ALOX5AP,FBP1,CSTA,S100A9,CD68,HLA-DPB1,CTSC,GCHFR,HLA-DPA1,LGALS3,CES1,OLR1,CTSD,HLA-DRB5,S100A10,ANXA5,MS4A7,FCGRT,LGALS3BP,AIF1,CTSB,MS4A4A,HLA-DQA1,CTSZ,LYZ,CXCL16,LPL,LST1,HLA-DMA,SPI1,CFD,APOE,GLUL,TKT,GLIPR2,CST3,ABCG1,HN1,CSTB,CYP27A…
WT: Cluster1	SFTPC,SFTPA1,SFTPB,SFTPA2,NAPSA,NPC2,SFTPD,SFTA2,SFTA3,CYB5A,PGC,SLC34A2,MUC1,AK1,RNASE1,DBI,SLPI,PEBP4,MBIP,LAMP3,S100A14,SELENBP1,C16orf89,LPCAT1,HOPX,MFSD2A,CXCL17,MGST1,CTSH,MALL,SDR16C5,NKX2-1,ABCA3,SEPP1,C3,FGGY,ALOX15B,LRRK2,WIF1,SDC4,NGFRAP1,ETV5,CEBPD,CA2,C4BPA,TFPI,SECISBP2L,CLDN18,HHIP,PRDX5,ALPL,WFDC2,MID1IP1,PEBP1,CACNA2D2,C8orf4,FASN,GPR116,PLA2G1B,ATP1A1,PIGR,FOLR1,FABP5,DHCR24,IRX…
WT: Cluster2	EML4,FTL,FABP4,RP11-1143G9.4,LPL,APOC1,GCHFR,TFRC,C1QA,MSR1,MGST3,HLA-DPB1,FABP5,CSTB,S100A11,HLA-DRA,FTH1,C1QB,INHBA,HLA-DPA1,FAM89A,THBS1,LYZ,HLA-DQB1,PPARG,SERPINA1,MAP1LC3B,CTNNB1,ALDH2,TYROBP,FBP1,NOP10,OLR1,C1QC,C19orf59,PCOLCE2,SMCO4,HLA-DRB1,FOLR3,S100A10,CSTA,CDC42,RP11-598F7.3,PNPLA6,TXN,DAB2,CEBPB,HLA-DMA,SERPING1,TREM1,S100A9,RP11-290F20.3,CTSL,SQRDL,CYP27A1,CD74,VSIG4,CES1,RETN,CAPZA…
WT: Cluster3	HLA-DRB1,HLA-DRA,HLA-DPB1,HLA-DPA1,HLA-DQB1,CD74,HLA-DQA1,GPX1,TYMP,MAFB,DAB2,SQRDL,HLA-DMA,C15orf48,FPR3,CLEC10A,RGS10,HLA-DMB,MS4A6A,TMEM176B,LILRB4,TYROBP,LIPA,RNASE6,MGAT1,HMGA1,EIF4A1,HLA-DQA2,FCN1,FDX1,SLAMF8,GCHFR,TGFBI,FCGR2B,AIF1,TREM2,SERPINF1,FAM26F,FAM105A,HLA-DRB5,TNFSF13B,TMSB10,GRN,LYZ,SGK1,CHIT1,SPI1,A2M,LST1,CSF1R,C12orf45,CHI3L1,PEA15,ITGB2,APOE,CCL17,RGS2,CPVL,C1QC,MS4A7,CTSB,T…
WT: Cluster4	CD3D,IL32,CD3E,CD2,CCL5,BTG1,RPS27,IL7R,PTPRCAP,RPS29,CXCR4,RPS27A,CORO1A,RPL23A,RBPJ,RPS15A,CCND3,APRT,IL2RG,LEPROTL1,POLR3GL,MSN,TMEM173,CYTIP,HMOX2,RPSAP58,YWHAQ,RPL13A,CORO1B,CTSW,GTF3A,RPS3,SLA,DDX24,GZMA,CCDC107,SNRPD2,DHRS7,RPLP2,TERF2IP,TUBA4A,AIP,HCST,EVL,RAC2,RPL30,SEPT7,RPL28,CD48,N4BP2L2,ARF6,PTPRC,RPL19,ANKRD12,CD7,RPL13,RPL21,PIK3IP1,MALAT1,SP100,ID2,PLP2,RABAC1,GIMAP4,TBC1D10C,ELF1…
WT: Cluster5	FOLR1,TACSTD2,WFDC2,CFH,TSPAN8,KLK11,LCN2,MGP,TMEM45A,LTF,AQP5,MIR205HG,FMO2,MGST1,KRT7,KRT19,PPAP2C,TSPAN1,TFF3,CP,EFCAB4A,CXCL17,ELF3,KIAA1324,CYB5A,MSMB,CYP4B1,ZG16B,MMP7,CXCL1,MUC5B,SLPI,GPRC5A,FXYD3,GSTA1,EPCAM,ATP1B1,CLDN4,TMC5,PLK2,AGR2,MDK,C19orf33,ADIRF,CEACAM6,SPINT1,KLK10,CYP2F1,S100A16,AKR1C1,CAV1,C16orf89,KRT8,SCGB3A1,S100A14,AGR3,ST6GALNAC1,CLU,S100P,RNASE1,NGFRAP1,SFTA1P,HES4,KRT18…
WT: Cluster6	TMEM190,CAPS,TPPP3,RSPH1,C20orf85,C9orf24,PRDX5,LRRIQ1,FAM183A,PIFO,C5orf49,TSPAN1,MS4A8,CETN2,CCDC170,HSP90AA1,CAPSL,C1orf194,ODF3B,SNTN,DYNLRB2,CCDC78,C11orf88,ROPN1L,CCDC146,LRRC46,MORN2,TUBB4B,C9orf116,ZMYND10,CCDC11,MORN5,LRRC23,TEKT1,FAM92B,C1orf192,TCTEX1D2,SMIM22,DYNLL1,LRRC48,AGR3,RSPH9,DNALI1,WDR54,AC013264.2,SLC44A4,DNAAF1,FAM229B,WDR38,EFCAB1,TUBA1A,DPCD,LINC01171,CCDC42B,EFHC1,NME5,K…
WT: Cluster7	GBP1,C1QB,C1QA,IFIT3,SOD2,TNFSF13B,FTL,SQRDL,CXCL9,CXCL11,LAP3,TNFAIP6,STAT1,HLA-DRB1,SRI,WARS,CXCL10,HLA-DRA,FTH1,HLA-DQB1,APOC1,IFIT2,SERPING1,HLA-DPB1,HLA-DPA1,C1QC,SNX10,S100A11,CD40,UBD,CLC,CD74,MX1,SERPINA1,C15orf48,GBP5,IL4I1,FCGR1A,SSB,GCHFR,IFI35,MGST3,VAMP5,ALDH2,SAMD9L,ISG15,SLAMF8,EPSTI1,TYMP,HLA-DQA1,GBP4,SMCO4,GBP2,IFI44L,GRN,MARCO,EML4,TSPO,UBE2L6,ETHE1,TXN,CCL15,PSME2,USP30-AS1,AN…
WT: Cluster8	FCN1,RP11-290F20.3,S100A12,APOBEC3A,CLEC4E,CPVL,LYPD2,CNIH4,LST1,TNFSF13B,THBS1,FGL2,FGR,CD163,CFP,MAFB,PGLS,BCL2A1,NUP214,CLEC7A,RILPL2,MTPN,COTL1,VCAN,CASP1,MS4A6A,HSBP1,CEBPB,CLEC4A,SLC11A1,RNF13,SAT1,IFI30,LAMTOR4,CDA,TIMP1,C5AR1,FKBP5,H3F3A,CD300E,SOD2,RNASE6,GABARAP,MCL1,CD86,AP1S2,NUDT16,ICAM2,HIGD2A,RPS24,ATP5D,RIN3,ZFAS1,AIF1,CD302,FPR2,UPP1,PABPC1,C14orf2,FPR1,COX7B,TKT,NACA,CRTAP,S100A…
WT: Cluster9	CA2,LRRK2,ETV5,PEBP4,SFTPC,ALOX15B,MFSD2A,ABCA3,CYB5A,LPCAT1,LAMP3,SFTA3,FGGY,RNASE1,S100A14,PGC,SFTPA1,MBIP,C16orf89,NKX2-1,C4BPA,SECISBP2L,DBI,FOLR1,C8orf4,TFPI,SLC34A2,SDR16C5,CLDN18,HHIP,NGFRAP1,MALL,WIF1,SFTA1P,PLA2G1B,SFTPA2,C3,ALPL,DHCR24,GKN2,FMO5,CXCL17,SELENBP1,FASN,IRX3,SFTPB,PIGR,SFTPD,NAPSA,MUC1,SFTA2,FXYD3,SEPP1,KRT18,GCHFR,HSD17B6,AK1,WFDC2,SCD,CRNDE,PMM1,AC090616.2,GPR116,FBP1,TPP…
WT: Cluster10	TM4SF18,MMRN1,CYR61,RUNX1T1,CCL21,CLDN5,ENG,GPM6A,GNG11,IGF1,ECSCR,ELTD1,ANGPT2,ASGR1,LDB2,STXBP2,IGFBP7,FABP4,TM4SF1,TFPI,FTL,C1QA,ID3,C1QB,FTH1,TFF3,GSTO1,S100A11,ID1,C1QC,RELN,GIMAP5,APOD,C19orf59,CTGF,TSPO,APOC1,ACAT1,FCER1G,S100A9,LYVE1,ARID5B,TYROBP,HLA-DRA,TREM1,GRN,DEGS1,VIM,TMEM33,LY86,ARL4A,FCGR2A,MARCO,CD74,AIF1,SDPR,CST3,CD52,HLA-DQB1,ALOX5AP,CLEC4M,LGALS3,CYBA,HLA-DQA1,S100A10,S100A4…
WT: Cluster11	H2AFZ,DTYMK,KIAA0101,STMN1,LSM4,DHFR,TK1,CENPW,DEK,RAN,ZWINT,UBE2C,NUSAP1,CDK1,CDKN3,CENPU,TUBA1B,CDT1,CCNB2,SMC2,TYMS,BIRC5,UBE2T,PTTG1,SKA2,GGH,RPA3,ASF1B,SAC3D1,MAD2L1,TOP2A,CENPF,ANP32B,RHEB,RAD51AP1,MND1,STRA13,FAM111A,CENPN,MKI67,NUDT1,HMGN2,SLBP,MCM7,KPNA2,TCF19,DNAJC9,TMEM106C,CLSPN,TUBA1C,H2AFV,PRC1,CKS1B,RNASEH2A,H2AFX,CENPM,MZT1,HMMR,CDC20,CENPE,AURKB,PHF19,RRM2,LSM5,CENPK,CKS2,TPX2,UB…
WT: Cluster12	CPA3,RGS13,C1orf186,RP11-354E11.2,LTC4S,TPSAB1,GATA2,SLC18A2,KIT,MAOB,HPGDS,HDC,CALB2,FCER1A,RENBP,GRAP2,FAM212A,C10orf128,HPGD,RGS1,BEX4,SVOPL,LAPTM4A,MSRA,NTM,ITM2C,ACOT7,IL1RL1,RGS2,STXBP6,ST3GAL4,TESC,TMEM233,C1orf228,CD9,RPL36AL,PROCR,TESPA1,SDPR,CNRIP1,PTGS1,MS4A2,VWA5A,CTTNBP2,RHBDD2,RP11-557H15.4,LAT2,RAC2,CLU,SAMSN1,GCSAML,BTK,CD69,PEBP1,MLPH,RAB34,CD33,ARHGAP18,MPP1,ITM2A,RGS10,ID2,ARL2…
WT: Cluster13	MS4A1,CD79A,RP5-887A10.1,VPREB3,AL928768.3,BLK,LINC00926,CD79B,TNFRSF13B,PTPRCAP,CD37,CD27,RPS27,RPLP2,RPS10,RPL28,BANK1,RPS16,RPL38,RPL13A,RPS23,FAIM3,RPL30,TCL1A,GLTSCR2,RPS29,RPL39,EEF1A1,RPL11,CCR7,RPL21,RPS2,RPS15A,FAU,RPL23A,IRF8,RPS25,BTG1,EEF1B2,RPL27A,RPS27A,SMIM14,RPS21,RPL26,RPL19,RPL15,RPL32,CCND3,RPL9,RPL7A,RPSAP58,RPS20,TOMM7,RAC2,RPL12,RPL36A,GNG7,LTB,CXCR4,RPL27,RPL17,RPS8,LIMD2,E…
WT: Cluster14	MZB1,TNFRSF17,DERL3,JSRP1,CD79A,FCRL5,ITM2C,OS9,SPAG4,AL928768.3,CD27,IGLL5,PNOC,GNG7,POU2AF1,SSR3,ARSA,CCPG1,SEC61B,SLAMF7,LMAN2,TMEM208,AMPD1,KDELR2,TMBIM6,TAPBPL,VIMP,RPN2,OSTC,SRM,DNAJC3,DERL1,TNFRSF13B,SSR4,CERCAM,FKBP11,SERP1,CTHRC1,PDIA4,PPIB,HLA-DOB,RASGRP3,TRAM1,C16orf74,C19orf10,KDELR1,ICAM2,PIM2,RP11-492E3.2,CHPF,MEI1,NEU1,CALR,SDC1,SLC22A17,ATRAID,HSP90B1,KIAA0125,TMEM205,TMED10,CCR10…
WT: Cluster15	PRF1,FGFBP2,NKG7,KLRF1,CST7,KLRB1,CD247,GZMB,GNLY,SPON2,GZMA,CLIC3,CD7,S1PR5,KLRD1,GZMM,CTSW,LAIR2,GZMH,TMIGD2,CD160,CCL5,GPR56,ITGB2,CCL4,HCST,PTGDR,PTPRCAP,PLAC8,PTGDS,ETS1,HSH2D,SELPLG,CMC1,EFHD2,LYAR,LCK,ZAP70,SH2D1B,SH2D2A,RAC2,SPN,EIF3G,DHRS7,TRAPPC1,PLEKHF1,PXN,LIMD2,TXNIP,HDDC2,TNFRSF18,FCGR3A,PHB,LSP1,CCND3,P4HB,PYHIN1,FGR,SAMD3,G6PD,CYTIP,CD97,PTPRC,AES,IL2RB,ITPA,TXK,SH3BP5,CDC42,ID2,U…
WT: Cluster16	CPB1,PLA2G2A,OGN,TFPI2,CCDC80,CCL2,HTRA1,UPK1B,BCHE,TGM1,PRG4,GFPT2,HAS1,ADH1B,MT1G,MSLN,TPM2,MEDAG,CLDN1,RARRES2,CD200,IGFBP6,PDPN,ALDH1A3,UPK3B,CCDC64,CRYAB,DES,CLDN15,NR4A3,RP11-572C15.6,RBP4,CALB2,VCAM1,BDKRB1,SYT4,LINC01133,CALD1,GAS1,LAMA4,COL6A2,PLAC9,RBP1,KRT5,CFB,CHRDL1,CPE,CSRP1,MAFF,SBSPON,IGFBP5,HP,SEMA3C,EFEMP1,TMEM151A,GNG11,CDC42EP2,DUSP5,FOSL1,MT1M,AEBP1,CFI,PTGIS,HEG1,ANGPTL2,C1S…
WT: Cluster17	RAMP2,CLDN5,VWF,SPARCL1,FCN3,CLEC14A,RAMP3,PTPRB,SRPX,EDN1,DARC,SLCO2A1,TMEM100,TIMP3,MMRN2,MT1M,JAM2,SELP,GPX3,RGS5,PALMD,IL33,IGFBP4,SOX17,TEK,PDLIM1,CALCRL,CDH5,TBX3,NPDC1,FZD4,KANK3,PTGDS,ELN,PTGIS,RNASE1,PRSS23,SLC6A4,HEY1,HIF3A,AC011526.1,PODXL,C10orf10,PLAC9,LIFR,AQP1,TINAGL1,FOXF1,LDB2,NNMT,RAPGEF4,SORBS2,HSPG2,HRCT1,MYL12B,PLLP,CXCL12,DOCK9,CRIP2,ELTD1,CAV2,CAV1,RHOB,PTRF,FAM107A,PCDH17,…

## Sheet: LAM2joint Clusterwise Enrichmen
ID	Description	GeneRatio	BgRatio	pvalue	p.adjust	qvalue	geneID	Count	Enrichment	Cluster
hsa04145	KEGG:Phagosome	27/132	152/8104	4.12304e-21	8.90576e-19	7.03086e-19	MARCO/HLA-DRB1/HLA-DQB1/HLA-DRA/HLA-DPB1/HLA-DPA1/OLR1/HLA-DRB5/HLA-DQA1/HLA-DMA/NCF2/HLA-DMB/RAC1/CTSL/MSR1/CYBA/CTSS/FCGR2A/FCGR1A/FCGR3A/ATP6V0B/LAMP2/ATP6V1F/RAB5C/ATP6V0D1/CYBB/ATP6V1E1	27	KEGG	LAM2joint: Cluster0
hsa05150	KEGG:Staphylococcus aureus infection	17/132	96/8104	1.47986e-13	1.59825e-11	1.26178e-11	C1QA/C1QB/C1QC/HLA-DRB1/HLA-DQB1/HLA-DRA/HLA-DPB1/HLA-DPA1/HLA-DRB5/HLA-DQA1/HLA-DMA/CFD/HLA-DMB/FPR1/FCGR2A/FCGR1A/FCGR3A	17	KEGG	LAM2joint: Cluster0
hsa05152	KEGG:Tuberculosis	21/132	180/8104	8.68007e-13	5.45134e-11	4.30369e-11	HLA-DRB1/HLA-DQB1/HLA-DRA/CD74/HLA-DPB1/HLA-DPA1/CTSD/HLA-DRB5/HLA-DQA1/HLA-DMA/FCER1G/HLA-DMB/CTSS/FCGR2A/FCGR1A/FCGR3A/ATP6V0B/LAMP2/RAB5C/ATP6V0D1/RHOA	21	KEGG	LAM2joint: Cluster0
hsa05140	KEGG:Leishmaniasis	15/132	77/8104	1.00951e-12	5.45134e-11	4.30369e-11	HLA-DRB1/HLA-DQB1/HLA-DRA/HLA-DPB1/HLA-DPA1/HLA-DRB5/HLA-DQA1/HLA-DMA/NCF2/HLA-DMB/CYBA/FCGR2A/FCGR1A/FCGR3A/CYBB	15	KEGG	LAM2joint: Cluster0
hsa05323	KEGG:Rheumatoid arthritis	16/132	93/8104	1.28899e-12	5.56844e-11	4.39614e-11	HLA-DRB1/HLA-DQB1/HLA-DRA/ACP5/HLA-DPB1/HLA-DPA1/HLA-DRB5/HLA-DQA1/HLA-DMA/HLA-DMB/CTSL/ATP6V0B/ATP6V1F/ATP6V0D1/ATP6V1E1/TNFSF13B	16	KEGG	LAM2joint: Cluster0
hsa04142	KEGG:Lysosome	17/132	128/8104	1.88889e-11	6.80002e-10	5.36844e-10	ACP5/CD68/CTSC/CTSD/CTSB/CTSZ/CTSL/PSAP/CTSS/SLC11A1/HEXB/ATP6V0B/LAMP2/PPT1/ATP6V0D1/GAA/GGA2	17	KEGG	LAM2joint: Cluster0
hsa05310	KEGG:Asthma	10/132	31/8104	3.09388e-11	9.54683e-10	7.53697e-10	HLA-DRB1/HLA-DQB1/HLA-DRA/HLA-DPB1/HLA-DPA1/HLA-DRB5/HLA-DQA1/HLA-DMA/FCER1G/HLA-DMB	10	KEGG	LAM2joint: Cluster0
hsa04612	KEGG:Antigen processing and presentation	13/132	78/8104	2.80616e-10	7.57663e-09	5.98155e-09	HLA-DRB1/HLA-DQB1/HLA-DRA/CD74/HLA-DPB1/HLA-DPA1/HLA-DRB5/CTSB/HLA-DQA1/HLA-DMA/HLA-DMB/CTSL/CTSS	13	KEGG	LAM2joint: Cluster0
hsa05322	KEGG:Systemic lupus erythematosus	16/132	136/8104	4.91422e-10	1.17941e-08	9.31116e-09	C1QA/C1QB/C1QC/HLA-DRB1/HLA-DQB1/HLA-DRA/HLA-DPB1/HLA-DPA1/HLA-DRB5/HLA-DQA1/HLA-DMA/HLA-DMB/FCGR2A/FCGR1A/FCGR3A/H2AZ1	16	KEGG	LAM2joint: Cluster0
hsa04672	KEGG:Intestinal immune network for IgA production	10/132	49/8104	4.47207e-09	9.65967e-08	7.62606e-08	HLA-DRB1/HLA-DQB1/HLA-DRA/HLA-DPB1/HLA-DPA1/HLA-DRB5/HLA-DQA1/HLA-DMA/HLA-DMB/TNFSF13B	10	KEGG	LAM2joint: Cluster0
hsa05330	KEGG:Allograft rejection	9/132	38/8104	6.70816e-09	1.31724e-07	1.03993e-07	HLA-DRB1/HLA-DQB1/HLA-DRA/HLA-DPB1/HLA-DPA1/HLA-DRB5/HLA-DQA1/HLA-DMA/HLA-DMB	9	KEGG	LAM2joint: Cluster0
hsa05332	KEGG:Graft-versus-host disease	9/132	42/8104	1.73668e-08	3.12602e-07	2.46791e-07	HLA-DRB1/HLA-DQB1/HLA-DRA/HLA-DPB1/HLA-DPA1/HLA-DRB5/HLA-DQA1/HLA-DMA/HLA-DMB	9	KEGG	LAM2joint: Cluster0
hsa04940	KEGG:Type I diabetes mellitus	9/132	43/8104	2.16638e-08	3.59953e-07	2.84173e-07	HLA-DRB1/HLA-DQB1/HLA-DRA/HLA-DPB1/HLA-DPA1/HLA-DRB5/HLA-DQA1/HLA-DMA/HLA-DMB	9	KEGG	LAM2joint: Cluster0
hsa05416	KEGG:Viral myocarditis	10/132	60/8104	3.52534e-08	5.4391e-07	4.29402e-07	HLA-DRB1/HLA-DQB1/HLA-DRA/HLA-DPB1/HLA-DPA1/HLA-DRB5/HLA-DQA1/HLA-DMA/HLA-DMB/RAC1	10	KEGG	LAM2joint: Cluster0
hsa05320	KEGG:Autoimmune thyroid disease	9/132	53/8104	1.48374e-07	2.13659e-06	1.68678e-06	HLA-DRB1/HLA-DQB1/HLA-DRA/HLA-DPB1/HLA-DPA1/HLA-DRB5/HLA-DQA1/HLA-DMA/HLA-DMB	9	KEGG	LAM2joint: Cluster0
hsa05321	KEGG:Inflammatory bowel disease	9/132	65/8104	9.07542e-07	1.22518e-05	9.67249e-06	HLA-DRB1/HLA-DQB1/HLA-DRA/HLA-DPB1/HLA-DPA1/HLA-DRB5/HLA-DQA1/HLA-DMA/HLA-DMB	9	KEGG	LAM2joint: Cluster0
hsa04640	KEGG:Hematopoietic cell lineage	10/132	99/8104	4.25526e-06	5.40668e-05	4.26843e-05	HLA-DRB1/HLA-DQB1/HLA-DRA/HLA-DPB1/HLA-DPA1/HLA-DRB5/HLA-DQA1/HLA-DMA/HLA-DMB/FCGR1A	10	KEGG	LAM2joint: Cluster0
hsa04380	KEGG:Osteoclast differentiation	11/132	128/8104	6.79667e-06	8.15601e-05	6.43895e-05	ACP5/TYROBP/SPI1/PPARG/NCF2/RAC1/CYBA/FCGR2A/FCGR1A/FCGR3A/TREM2	11	KEGG	LAM2joint: Cluster0
hsa05145	KEGG:Toxoplasmosis	10/132	112/8104	1.29234e-05	0.000146918	0.000115988	HLA-DRB1/HLA-DQB1/HLA-DRA/HLA-DPB1/HLA-DPA1/HLA-DRB5/HLA-DQA1/HLA-DMA/ALOX5/HLA-DMB	10	KEGG	LAM2joint: Cluster0
hsa04658	KEGG:Th1 and Th2 cell differentiation	9/132	92/8104	1.70241e-05	0.00018386	0.000145153	HLA-DRB1/HLA-DQB1/HLA-DRA/HLA-DPB1/HLA-DPA1/HLA-DRB5/HLA-DQA1/HLA-DMA/HLA-DMB	9	KEGG	LAM2joint: Cluster0
hsa04659	KEGG:Th17 cell differentiation	9/132	107/8104	5.71971e-05	0.000588314	0.000464458	HLA-DRB1/HLA-DQB1/HLA-DRA/HLA-DPB1/HLA-DPA1/HLA-DRB5/HLA-DQA1/HLA-DMA/HLA-DMB	9	KEGG	LAM2joint: Cluster0
hsa00030	KEGG:Pentose phosphate pathway	5/132	30/8104	0.000109178	0.00107193	0.000846257	FBP1/TKT/PGD/TALDO1/ALDOA	5	KEGG	LAM2joint: Cluster0
hsa04979	KEGG:Cholesterol metabolism	6/132	50/8104	0.0001471	0.00138146	0.00109062	APOC1/TSPO/LPL/APOE/CYP27A1/LRPAP1	6	KEGG	LAM2joint: Cluster0
hsa03320	KEGG:PPAR signaling pathway	7/132	76/8104	0.000222761	0.00200485	0.00158277	FABP4/OLR1/LPL/CYP27A1/FABP5/PPARG/PLIN2	7	KEGG	LAM2joint: Cluster0
hsa05169	KEGG:Epstein-Barr virus infection	11/132	202/8104	0.00043662	0.00370125	0.00292204	HLA-DRB1/HLA-DQB1/HLA-DRA/HLA-DPB1/HLA-DPA1/HLA-DRB5/HLA-DQA1/HLA-DMA/VIM/HLA-DMB/RAC1	11	KEGG	LAM2joint: Cluster0
hsa04610	KEGG:Complement and coagulation cascades	7/132	85/8104	0.000445521	0.00370125	0.00292204	C1QA/C1QB/SERPINA1/C1QC/VSIG4/SERPING1/CFD	7	KEGG	LAM2joint: Cluster0
hsa05164	KEGG:Influenza A	10/132	172/8104	0.000478553	0.00382842	0.00302244	HLA-DRB1/HLA-DQB1/HLA-DRA/HLA-DPB1/HLA-DPA1/HLA-DRB5/HLA-DQA1/HLA-DMA/PYCARD/HLA-DMB	10	KEGG	LAM2joint: Cluster0
hsa04514	KEGG:Cell adhesion molecules	9/132	149/8104	0.000700065	0.0054005	0.00426355	HLA-DRB1/HLA-DQB1/HLA-DRA/HLA-DPB1/HLA-DPA1/HLA-DRB5/HLA-DQA1/HLA-DMA/HLA-DMB	9	KEGG	LAM2joint: Cluster0
hsa05166	KEGG:Human T-cell leukemia virus 1 infection	11/132	219/8104	0.000858849	0.00639694	0.00505022	TSPO/HLA-DRB1/HLA-DQB1/HLA-DRA/HLA-DPB1/HLA-DPA1/HLA-DRB5/HLA-DQA1/HLA-DMA/SPI1/HLA-DMB	11	KEGG	LAM2joint: Cluster0
hsa04666	KEGG:Fc gamma R-mediated phagocytosis	7/132	97/8104	0.00098676	0.00710467	0.00560895	RAC1/FCGR2A/FCGR1A/FCGR3A/ARPC1B/HCK/ARPC3	7	KEGG	LAM2joint: Cluster0
hsa05133	KEGG:Pertussis	6/132	76/8104	0.00143306	0.00998522	0.00788307	C1QA/C1QB/C1QC/SERPING1/PYCARD/RHOA	6	KEGG	LAM2joint: Cluster0
hsa05100	KEGG:Bacterial invasion of epithelial cells	6/132	77/8104	0.00153374	0.0103527	0.00817321	RAC1/ARPC1B/SEPTIN11/ARPC3/FN1/RHOA	6	KEGG	LAM2joint: Cluster0
hsa05418	KEGG:Fluid shear stress and atherosclerosis	8/132	139/8104	0.00188994	0.0123705	0.0097662	MGST3/GSTO1/NCF2/RAC1/CTSL/TXN/CYBA/RHOA	8	KEGG	LAM2joint: Cluster0
hsa00480	KEGG:Glutathione metabolism	5/132	57/8104	0.002258	0.014345	0.011325	MGST3/GSTO1/GPX1/PGD/GPX4	5	KEGG	LAM2joint: Cluster0
hsa04613	KEGG:Neutrophil extracellular trap formation	9/132	190/8104	0.00376625	0.0232431	0.0183498	NCF2/RAC1/FPR1/CYBA/FCGR2A/FCGR1A/FCGR3A/CYBB/H2AZ1	9	KEGG	LAM2joint: Cluster0
hsa04216	KEGG:Ferroptosis	4/132	41/8104	0.00427186	0.0256311	0.0202351	FTL/FTH1/GPX4/CYBB	4	KEGG	LAM2joint: Cluster0
hsa05120	KEGG:Epithelial cell signaling in Helicobacter pylori infection	5/132	70/8104	0.00551796	0.032213	0.0254313	RAC1/ATP6V0B/ATP6V1F/ATP6V0D1/ATP6V1E1	5	KEGG	LAM2joint: Cluster0
hsa05135	KEGG:Yersinia infection	7/132	137/8104	0.00691719	0.0393188	0.0310411	PYCARD/RAC1/FCGR2A/ARPC1B/ARPC3/FN1/RHOA	7	KEGG	LAM2joint: Cluster0
hsa05132	KEGG:Salmonella infection	10/132	249/8104	0.00732626	0.0398426	0.0314546	S100A10/PYCARD/RAC1/TXN/ANXA2/RAB5C/ARPC1B/ARPC3/RHOA/TCF7L2	10	KEGG	LAM2joint: Cluster0
hsa01230	KEGG:Biosynthesis of amino acids	5/132	75/8104	0.00737825	0.0398426	0.0314546	GLUL/TKT/TALDO1/ALDOA/PKM	5	KEGG	LAM2joint: Cluster0
hsa05417	KEGG:Lipid and atherosclerosis	9/132	215/8104	0.00834485	0.0436189	0.034436	OLR1/ABCG1/PPARG/PYCARD/NCF2/RAC1/CYBA/CYBB/RHOA	9	KEGG	LAM2joint: Cluster0
hsa05110	KEGG:Vibrio cholerae infection	4/132	50/8104	0.00868278	0.0436189	0.034436	ATP6V0B/ATP6V1F/ATP6V0D1/ATP6V1E1	4	KEGG	LAM2joint: Cluster0
hsa04721	KEGG:Synaptic vesicle cycle	5/132	78/8104	0.00868339	0.0436189	0.034436	AP2S1/ATP6V0B/ATP6V1F/ATP6V0D1/ATP6V1E1	5	KEGG	LAM2joint: Cluster0
hsa04966	KEGG:Collecting duct acid secretion	3/132	27/8104	0.00928533	0.0455825	0.0359862	ATP6V1F/ATP6V0D1/ATP6V1E1	3	KEGG	LAM2joint: Cluster0
hsa00983	KEGG:Drug metabolism - other enzymes	5/132	80/8104	0.00963735	0.0462593	0.0365205	MGST3/CES1/GSTO1/UPP1/TYMP	5	KEGG	LAM2joint: Cluster0
hsa01200	KEGG:Carbon metabolism	6/132	116/8104	0.011487	0.0539392	0.0425835	FBP1/TKT/PGD/TALDO1/ALDOA/PKM	6	KEGG	LAM2joint: Cluster0
hsa00590	KEGG:Arachidonic acid metabolism	4/132	61/8104	0.017164	0.0788815	0.0622749	ALOX5/GPX1/LTA4H/PLAAT3	4	KEGG	LAM2joint: Cluster0
HALLMARK_COMPLEMENT	MSIGDB:COMPLEMENT	19/111	200/4384	4.08063e-07	1.67306e-05	1.37453e-05	C1QA/APOC1/SERPINA1/C1QC/SERPING1/S100A9/CTSC/LGALS3/OLR1/CTSD/ANXA5/CTSB/FCER1G/LTA4H/CTSL/CTSS/LAMP2/GCA/FN1	19	MSIGDB HALLMARK	LAM2joint: Cluster0
HALLMARK_CHOLESTEROL_HOMEOSTASIS	MSIGDB:CHOLESTEROL_HOMEOSTASIS	9/111	74/4384	8.61839e-05	0.00174754	0.00143572	S100A11/LGALS3/ANXA5/CXCL16/LPL/FABP5/PPARG/ETHE1/ECH1	9	MSIGDB HALLMARK	LAM2joint: Cluster0
HALLMARK_ADIPOGENESIS	MSIGDB:ADIPOGENESIS	15/111	200/4384	0.000127869	0.00174754	0.00143572	ALDH2/FABP4/MGST3/LPL/APOE/TKT/PPARG/DECR1/RETN/PLIN2/TALDO1/ALDOA/GPX4/REEP5/ECH1	15	MSIGDB HALLMARK	LAM2joint: Cluster0
HALLMARK_COAGULATION	MSIGDB:COAGULATION	11/111	138/4384	0.000645379	0.00661514	0.00543477	C1QA/APOC1/SERPINA1/SERPING1/OLR1/CTSB/CFD/LTA4H/RAC1/LAMP2/FN1	11	MSIGDB HALLMARK	LAM2joint: Cluster0
HALLMARK_REACTIVE_OXYGEN_SPECIES_PATHWAY	MSIGDB:REACTIVE_OXYGEN_SPECIES_PATHWAY	5/111	49/4384	0.00746783	0.0612362	0.0503096	FTL/TXN/GLRX/GPX4/PRDX1	5	MSIGDB HALLMARK	LAM2joint: Cluster0
HALLMARK_INTERFERON_GAMMA_RESPONSE	MSIGDB:INTERFERON_GAMMA_RESPONSE	11/111	200/4384	0.011678	0.0719723	0.05913	HLA-DRB1/SERPING1/CD74/LGALS3BP/HLA-DQA1/HLA-DMA/FPR1/VAMP8/FCGR1A/UPP1/LY6E	11	MSIGDB HALLMARK	LAM2joint: Cluster0
HALLMARK_ANGIOGENESIS	MSIGDB:ANGIOGENESIS	4/111	36/4384	0.0122879	0.0719723	0.05913	OLR1/LPL/LRPAP1/S100A4	4	MSIGDB HALLMARK	LAM2joint: Cluster0
HALLMARK_FATTY_ACID_METABOLISM	MSIGDB:FATTY_ACID_METABOLISM	9/111	158/4384	0.0178348	0.0914031	0.0750937	S100A10/GLUL/DECR1/ALDOA/YWHAH/BLVRA/GPD1/ECH1/H2AZ1	9	MSIGDB HALLMARK	LAM2joint: Cluster0
GO:0043312	GO:neutrophil degranulation	50/188	485/18670	2.17229e-36	4.61581e-33	3.35779e-33	FTL/SERPINA1/S100A11/GRN/TYROBP/FTH1/FOLR3/S100A9/CD68/CTSC/LGALS3/OLR1/CTSD/CTSB/CTSZ/LYZ/CFD/CST3/CSTB/FCER1G/FABP5/STXBP2/ALOX5/MNDA/PYCARD/LTA4H/RETN/RAC1/FPR1/VAMP8/LAMTOR1/PSAP/SDCBP/ANXA2/CYBA/CTSS/S100A8/FCGR2A/SLC11A1/BRI3/ALDOA/HEXB/LAMP2/RAB5C/GCA/GAA/CYBB/RHOA/CREG1/PKM	50	GO	LAM2joint: Cluster0
GO:0002283	GO:neutrophil activation involved in immune response	50/188	488/18670	2.94e-36	4.61581e-33	3.35779e-33	FTL/SERPINA1/S100A11/GRN/TYROBP/FTH1/FOLR3/S100A9/CD68/CTSC/LGALS3/OLR1/CTSD/CTSB/CTSZ/LYZ/CFD/CST3/CSTB/FCER1G/FABP5/STXBP2/ALOX5/MNDA/PYCARD/LTA4H/RETN/RAC1/FPR1/VAMP8/LAMTOR1/PSAP/SDCBP/ANXA2/CYBA/CTSS/S100A8/FCGR2A/SLC11A1/BRI3/ALDOA/HEXB/LAMP2/RAB5C/GCA/GAA/CYBB/RHOA/CREG1/PKM	50	GO	LAM2joint: Cluster0
GO:0042119	GO:neutrophil activation	50/188	498/18670	7.94175e-36	6.87703e-33	5.00273e-33	FTL/SERPINA1/S100A11/GRN/TYROBP/FTH1/FOLR3/S100A9/CD68/CTSC/LGALS3/OLR1/CTSD/CTSB/CTSZ/LYZ/CFD/CST3/CSTB/FCER1G/FABP5/STXBP2/ALOX5/MNDA/PYCARD/LTA4H/RETN/RAC1/FPR1/VAMP8/LAMTOR1/PSAP/SDCBP/ANXA2/CYBA/CTSS/S100A8/FCGR2A/SLC11A1/BRI3/ALDOA/HEXB/LAMP2/RAB5C/GCA/GAA/CYBB/RHOA/CREG1/PKM	50	GO	LAM2joint: Cluster0
GO:0002446	GO:neutrophil mediated immunity	50/188	499/18670	8.76054e-36	6.87703e-33	5.00273e-33	FTL/SERPINA1/S100A11/GRN/TYROBP/FTH1/FOLR3/S100A9/CD68/CTSC/LGALS3/OLR1/CTSD/CTSB/CTSZ/LYZ/CFD/CST3/CSTB/FCER1G/FABP5/STXBP2/ALOX5/MNDA/PYCARD/LTA4H/RETN/RAC1/FPR1/VAMP8/LAMTOR1/PSAP/SDCBP/ANXA2/CYBA/CTSS/S100A8/FCGR2A/SLC11A1/BRI3/ALDOA/HEXB/LAMP2/RAB5C/GCA/GAA/CYBB/RHOA/CREG1/PKM	50	GO	LAM2joint: Cluster0
GO:0048002	GO:antigen processing and presentation of peptide antigen	24/188	189/18670	9.62541e-20	6.04475e-17	4.39729e-17	HLA-DRB1/HLA-DQB1/HLA-DRA/CD74/HLA-DPB1/HLA-DPA1/CTSD/HLA-DRB5/HLA-DQA1/HLA-DMA/FCER1G/PYCARD/NCF2/HLA-DMB/VAMP8/CTSL/AP2S1/CYBA/CTSS/SLC11A1/FCGR1A/TREM2/PSMA7/CYBB	24	GO	LAM2joint: Cluster0
GO:0019882	GO:antigen processing and presentation	25/188	226/18670	4.79555e-19	2.50967e-16	1.82567e-16	HLA-DRB1/HLA-DQB1/HLA-DRA/CD74/CD68/HLA-DPB1/HLA-DPA1/CTSD/HLA-DRB5/HLA-DQA1/HLA-DMA/FCER1G/PYCARD/NCF2/HLA-DMB/VAMP8/CTSL/AP2S1/CYBA/CTSS/SLC11A1/FCGR1A/TREM2/PSMA7/CYBB	25	GO	LAM2joint: Cluster0
GO:0002478	GO:antigen processing and presentation of exogenous peptide antigen	21/188	175/18670	6.94174e-17	3.11386e-14	2.2652e-14	HLA-DRB1/HLA-DQB1/HLA-DRA/CD74/HLA-DPB1/HLA-DPA1/CTSD/HLA-DRB5/HLA-DQA1/HLA-DMA/FCER1G/NCF2/HLA-DMB/VAMP8/CTSL/AP2S1/CYBA/CTSS/FCGR1A/PSMA7/CYBB	21	GO	LAM2joint: Cluster0
GO:0019884	GO:antigen processing and presentation of exogenous antigen	21/188	182/18670	1.56553e-16	6.14472e-14	4.47001e-14	HLA-DRB1/HLA-DQB1/HLA-DRA/CD74/HLA-DPB1/HLA-DPA1/CTSD/HLA-DRB5/HLA-DQA1/HLA-DMA/FCER1G/NCF2/HLA-DMB/VAMP8/CTSL/AP2S1/CYBA/CTSS/FCGR1A/PSMA7/CYBB	21	GO	LAM2joint: Cluster0
GO:0002495	GO:antigen processing and presentation of peptide antigen via MHC class II	17/188	101/18670	2.06988e-16	7.22159e-14	5.25338e-14	HLA-DRB1/HLA-DQB1/HLA-DRA/CD74/HLA-DPB1/HLA-DPA1/CTSD/HLA-DRB5/HLA-DQA1/HLA-DMA/FCER1G/PYCARD/HLA-DMB/CTSL/AP2S1/CTSS/TREM2	17	GO	LAM2joint: Cluster0
GO:0002504	GO:antigen processing and presentation of peptide or polysaccharide antigen via MHC class II	17/188	102/18670	2.46231e-16	7.73166e-14	5.62444e-14	HLA-DRB1/HLA-DQB1/HLA-DRA/CD74/HLA-DPB1/HLA-DPA1/CTSD/HLA-DRB5/HLA-DQA1/HLA-DMA/FCER1G/PYCARD/HLA-DMB/CTSL/AP2S1/CTSS/TREM2	17	GO	LAM2joint: Cluster0
GO:0019886	GO:antigen processing and presentation of exogenous peptide antigen via MHC class II	15/188	98/18670	5.56429e-14	1.58835e-11	1.15546e-11	HLA-DRB1/HLA-DQB1/HLA-DRA/CD74/HLA-DPB1/HLA-DPA1/CTSD/HLA-DRB5/HLA-DQA1/HLA-DMA/FCER1G/HLA-DMB/CTSL/AP2S1/CTSS	15	GO	LAM2joint: Cluster0
GO:0051235	GO:maintenance of location	21/188	330/18670	2.0176e-11	5.27938e-09	3.84051e-09	FTL/TSPO/FTH1/S100A9/ANXA5/LPL/APOE/ABCG1/GSTO1/PPARG/TXN/PLIN2/MSR1/CYBA/S100A8/TMSB4X/HEXB/TMSB10/ABHD5/FKBP1A/GAA	21	GO	LAM2joint: Cluster0
GO:0030100	GO:regulation of endocytosis	18/188	281/18670	5.34504e-10	1.24806e-07	9.07905e-08	APOC1/LGALS3/APOE/FCER1G/LRPAP1/PPARG/PYCARD/RAC1/AP2S1/SDCBP/ANXA2/CYBA/SLC11A1/TREM2/RAB5C/PPT1/HCK/DAB2	18	GO	LAM2joint: Cluster0
GO:0002576	GO:platelet degranulation	13/188	128/18670	5.56458e-10	1.24806e-07	9.07905e-08	SERPINA1/SERPING1/ANXA5/LGALS3BP/CFD/FCER1G/STXBP2/PSAP/TMSB4X/ALDOA/TAGLN2/LAMP2/FN1	13	GO	LAM2joint: Cluster0
GO:0034341	GO:response to interferon-gamma	15/188	199/18670	1.70338e-09	3.56574e-07	2.59391e-07	HLA-DRB1/HLA-DQB1/HLA-DRA/HLA-DPB1/HLA-DPA1/HLA-DRB5/AIF1/HLA-DQA1/CXCL16/VIM/STXBP2/PPARG/SLC11A1/FCGR1A/HCK	15	GO	LAM2joint: Cluster0
GO:0050727	GO:regulation of inflammatory response	22/188	485/18670	4.06747e-09	7.98241e-07	5.80685e-07	C1QA/C1QB/FABP4/C1QC/VSIG4/GRN/SERPING1/ACP5/S100A9/CTSC/LPL/APOE/FCER1G/PPARG/PYCARD/GPX1/VAMP8/S100A8/TMSB4X/TREM2/GPX4/HCK	22	GO	LAM2joint: Cluster0
GO:0060333	GO:interferon-gamma-mediated signaling pathway	10/188	91/18670	2.67529e-08	4.94142e-06	3.59467e-06	HLA-DRB1/HLA-DQB1/HLA-DRA/HLA-DPB1/HLA-DPA1/HLA-DRB5/HLA-DQA1/PPARG/FCGR1A/HCK	10	GO	LAM2joint: Cluster0
GO:0045088	GO:regulation of innate immune response	20/188	452/18670	3.26968e-08	5.70377e-06	4.14924e-06	MARCO/VSIG4/GRN/SERPING1/S100A9/CTSB/APOE/FCER1G/UBB/PPARG/MNDA/PYCARD/CTSL/CYBA/CTSS/S100A8/RTN4/TREM2/HCK/PSMA7	20	GO	LAM2joint: Cluster0
GO:0071346	GO:cellular response to interferon-gamma	13/188	180/18670	3.57819e-08	5.91342e-06	4.30175e-06	HLA-DRB1/HLA-DQB1/HLA-DRA/HLA-DPB1/HLA-DPA1/HLA-DRB5/AIF1/HLA-DQA1/VIM/STXBP2/PPARG/FCGR1A/HCK	13	GO	LAM2joint: Cluster0
GO:0006909	GO:phagocytosis	18/188	369/18670	3.82371e-08	6.00323e-06	4.36708e-06	MARCO/TYROBP/AIF1/FCER1G/PPARG/PYCARD/NCF2/RAC1/MSR1/CYBA/FCGR2A/SLC11A1/FCGR1A/FCGR3A/TREM2/ARPC1B/HCK/ARPC3	18	GO	LAM2joint: Cluster0
GO:0016042	GO:lipid catabolic process	17/188	333/18670	4.82399e-08	7.21301e-06	5.24714e-06	APOC1/FABP4/CES1/LPL/APOE/CYP27A1/FABP5/PLBD1/DECR1/PNPLA6/PSAP/HEXB/PLAAT3/YWHAH/PPT1/ABHD5/ECH1	17	GO	LAM2joint: Cluster0
GO:0045730	GO:respiratory burst	7/188	37/18670	7.48618e-08	1.06848e-05	7.77273e-06	GRN/NCF2/RAC1/CYBA/SLC11A1/HCK/CYBB	7	GO	LAM2joint: Cluster0
GO:0050670	GO:regulation of lymphocyte proliferation	13/188	208/18670	1.9501e-07	2.66231e-05	1.93671e-05	VSIG4/CD74/TYROBP/HLA-DPB1/HLA-DPA1/LGALS3/AIF1/LST1/MNDA/PYCARD/HLA-DMB/GPNMB/TNFSF13B	13	GO	LAM2joint: Cluster0
GO:0032944	GO:regulation of mononuclear cell proliferation	13/188	209/18670	2.06133e-07	2.69691e-05	1.96188e-05	VSIG4/CD74/TYROBP/HLA-DPB1/HLA-DPA1/LGALS3/AIF1/LST1/MNDA/PYCARD/HLA-DMB/GPNMB/TNFSF13B	13	GO	LAM2joint: Cluster0
GO:0002429	GO:immune response-activating cell surface receptor signaling pathway	19/188	473/18670	3.28102e-07	4.12096e-05	2.99782e-05	HLA-DRB1/HLA-DQB1/HLA-DRA/HLA-DPB1/HLA-DPA1/LGALS3/HLA-DRB5/HLA-DQA1/FCER1G/MNDA/RAC1/FPR1/FCGR2A/FCGR1A/FCGR3A/ARPC1B/HCK/ARPC3/PSMA7	19	GO	LAM2joint: Cluster0
GO:0070661	GO:leukocyte proliferation	15/188	298/18670	3.67027e-07	4.43255e-05	3.22449e-05	VSIG4/CD74/TYROBP/HLA-DPB1/HLA-DPA1/LGALS3/AIF1/LST1/MNDA/PYCARD/HLA-DMB/GPNMB/SLC11A1/TREM2/TNFSF13B	15	GO	LAM2joint: Cluster0
GO:0019915	GO:lipid storage	8/188	68/18670	4.01803e-07	4.6249e-05	3.36441e-05	LPL/APOE/ABCG1/PPARG/PLIN2/MSR1/HEXB/ABHD5	8	GO	LAM2joint: Cluster0
GO:0070663	GO:regulation of leukocyte proliferation	13/188	222/18670	4.12412e-07	4.6249e-05	3.36441e-05	VSIG4/CD74/TYROBP/HLA-DPB1/HLA-DPA1/LGALS3/AIF1/LST1/MNDA/PYCARD/HLA-DMB/GPNMB/TNFSF13B	13	GO	LAM2joint: Cluster0
GO:0042116	GO:macrophage activation	9/188	95/18670	4.90128e-07	5.30691e-05	3.86054e-05	C1QA/VSIG4/GRN/CD74/TYROBP/CTSC/AIF1/SLC11A1/TREM2	9	GO	LAM2joint: Cluster0
GO:1905952	GO:regulation of lipid localization	11/188	157/18670	5.62225e-07	5.88462e-05	4.2808e-05	APOC1/TSPO/LPL/APOE/ABCG1/PPARG/RETN/LAMTOR1/MSR1/ANXA2/ABHD5	11	GO	LAM2joint: Cluster0
GO:0046651	GO:lymphocyte proliferation	14/188	272/18670	6.98471e-07	7.04103e-05	5.12204e-05	VSIG4/CD74/TYROBP/HLA-DPB1/HLA-DPA1/LGALS3/AIF1/LST1/MNDA/PYCARD/HLA-DMB/GPNMB/SLC11A1/TNFSF13B	14	GO	LAM2joint: Cluster0
GO:0051452	GO:intracellular pH reduction	7/188	51/18670	7.47461e-07	7.04103e-05	5.12204e-05	GRN/SLC11A1/ATP6V0B/ATP6V1F/PPT1/ATP6V0D1/ATP6V1E1	7	GO	LAM2joint: Cluster0
GO:0030301	GO:cholesterol transport	9/188	100/18670	7.59951e-07	7.04103e-05	5.12204e-05	APOC1/TSPO/CES1/APOE/ABCG1/PPARG/LAMTOR1/MSR1/ANXA2	9	GO	LAM2joint: Cluster0
GO:0032943	GO:mononuclear cell proliferation	14/188	274/18670	7.62405e-07	7.04103e-05	5.12204e-05	VSIG4/CD74/TYROBP/HLA-DPB1/HLA-DPA1/LGALS3/AIF1/LST1/MNDA/PYCARD/HLA-DMB/GPNMB/SLC11A1/TNFSF13B	14	GO	LAM2joint: Cluster0
GO:0098869	GO:cellular oxidant detoxification	9/188	102/18670	8.99367e-07	8.06861e-05	5.86956e-05	MGST3/ALOX5AP/S100A9/APOE/GSTO1/GPX1/TXN/GPX4/PRDX1	9	GO	LAM2joint: Cluster0
GO:0045454	GO:cell redox homeostasis	8/188	76/18670	9.56987e-07	8.24343e-05	5.99673e-05	NCF2/GPX1/TXN/GLRX/CYBA/SLC11A1/CYBB/PRDX1	8	GO	LAM2joint: Cluster0
GO:0045851	GO:pH reduction	7/188	53/18670	9.78421e-07	8.24343e-05	5.99673e-05	GRN/SLC11A1/ATP6V0B/ATP6V1F/PPT1/ATP6V0D1/ATP6V1E1	7	GO	LAM2joint: Cluster0
GO:0032103	GO:positive regulation of response to external stimulus	15/188	323/18670	1.0154e-06	8.24343e-05	5.99673e-05	FABP4/GRN/CD74/S100A9/CTSC/AIF1/LPL/FCER1G/RAC1/VAMP8/CYBA/S100A8/TMSB4X/TREM2/LY86	15	GO	LAM2joint: Cluster0
GO:0071402	GO:cellular response to lipoprotein particle stimulus	6/188	34/18670	1.02387e-06	8.24343e-05	5.99673e-05	CD68/LPL/APOE/ABCG1/FCER1G/PPARG	6	GO	LAM2joint: Cluster0
GO:0002577	GO:regulation of antigen processing and presentation	5/188	20/18670	1.34612e-06	0.000105671	7.68707e-05	CD74/CD68/PYCARD/SLC11A1/TREM2	5	GO	LAM2joint: Cluster0
GO:0015918	GO:sterol transport	9/188	112/18670	1.97911e-06	0.000147962	0.000107636	APOC1/TSPO/CES1/APOE/ABCG1/PPARG/LAMTOR1/MSR1/ANXA2	9	GO	LAM2joint: Cluster0
GO:1990748	GO:cellular detoxification	9/188	112/18670	1.97911e-06	0.000147962	0.000107636	MGST3/ALOX5AP/S100A9/APOE/GSTO1/GPX1/TXN/GPX4/PRDX1	9	GO	LAM2joint: Cluster0
GO:0044242	GO:cellular lipid catabolic process	12/188	217/18670	2.12176e-06	0.000154938	0.00011271	APOC1/FABP4/LPL/APOE/FABP5/DECR1/PNPLA6/PSAP/HEXB/PPT1/ABHD5/ECH1	12	GO	LAM2joint: Cluster0
GO:0010876	GO:lipid localization	16/188	400/18670	3.07761e-06	0.000211054	0.000153532	APOC1/FABP4/TSPO/CES1/LPL/APOE/ABCG1/PPARG/RETN/PLIN2/LAMTOR1/MSR1/PSAP/ANXA2/HEXB/ABHD5	16	GO	LAM2joint: Cluster0
GO:0098883	GO:synapse pruning	4/188	11/18670	3.10966e-06	0.000211054	0.000153532	C1QA/C1QB/C1QC/TREM2	4	GO	LAM2joint: Cluster0
GO:0050900	GO:leukocyte migration	18/188	499/18670	3.13406e-06	0.000211054	0.000153532	CD74/TREM1/S100A9/LGALS3/OLR1/AIF1/CXCL16/FCER1G/PYCARD/RAC1/S100A8/DOK2/TREM2/SLC7A7/GYPC/HCK/FN1/RHOA	18	GO	LAM2joint: Cluster0
GO:0032371	GO:regulation of sterol transport	7/188	63/18670	3.2263e-06	0.000211054	0.000153532	APOC1/TSPO/APOE/ABCG1/PPARG/LAMTOR1/ANXA2	7	GO	LAM2joint: Cluster0
GO:0032374	GO:regulation of cholesterol transport	7/188	63/18670	3.2263e-06	0.000211054	0.000153532	APOC1/TSPO/APOE/ABCG1/PPARG/LAMTOR1/ANXA2	7	GO	LAM2joint: Cluster0
GO:0045807	GO:positive regulation of endocytosis	10/188	153/18670	3.486e-06	0.00022115	0.000160877	APOE/FCER1G/PPARG/PYCARD/ANXA2/CYBA/SLC11A1/TREM2/PPT1/DAB2	10	GO	LAM2joint: Cluster0
GO:0006826	GO:iron ion transport	7/188	64/18670	3.59193e-06	0.00022115	0.000160877	FTL/FTH1/SLC11A1/ATP6V0B/ATP6V1F/ATP6V0D1/ATP6V1E1	7	GO	LAM2joint: Cluster0
GO:0046503	GO:glycerolipid catabolic process	7/188	64/18670	3.59193e-06	0.00022115	0.000160877	APOC1/FABP4/LPL/APOE/FABP5/PNPLA6/ABHD5	7	GO	LAM2joint: Cluster0
GO:0006898	GO:receptor-mediated endocytosis	14/188	316/18670	4.06841e-06	0.000245669	0.000178713	APOC1/MARCO/CXCL16/APOE/FCER1G/LRPAP1/RAC1/MSR1/AP2S1/SDCBP/ANXA2/FCGR1A/PPT1/DAB2	14	GO	LAM2joint: Cluster0
GO:0002218	GO:activation of innate immune response	14/188	319/18670	4.53611e-06	0.000268743	0.000195498	MARCO/S100A9/CTSB/FCER1G/UBB/MNDA/PYCARD/CTSL/CYBA/CTSS/S100A8/RTN4/HCK/PSMA7	14	GO	LAM2joint: Cluster0
GO:0032680	GO:regulation of tumor necrosis factor production	10/188	160/18670	5.20097e-06	0.000299296	0.000217725	TSPO/ACP5/TYROBP/LPL/FCER1G/PYCARD/GPNMB/CYBA/TREM2/CYBB	10	GO	LAM2joint: Cluster0
GO:0051651	GO:maintenance of location in cell	8/188	95/18670	5.24245e-06	0.000299296	0.000217725	FTL/TSPO/FTH1/APOE/TXN/TMSB4X/TMSB10/GAA	8	GO	LAM2joint: Cluster0
GO:0097066	GO:response to thyroid hormone	5/188	26/18670	5.43788e-06	0.00030491	0.000221808	ANXA5/CTSB/CTSL/ANXA2/CTSS	5	GO	LAM2joint: Cluster0
GO:0032640	GO:tumor necrosis factor production	10/188	163/18670	6.13492e-06	0.000332132	0.000241611	TSPO/ACP5/TYROBP/LPL/FCER1G/PYCARD/GPNMB/CYBA/TREM2/CYBB	10	GO	LAM2joint: Cluster0
GO:1903555	GO:regulation of tumor necrosis factor superfamily cytokine production	10/188	163/18670	6.13492e-06	0.000332132	0.000241611	TSPO/ACP5/TYROBP/LPL/FCER1G/PYCARD/GPNMB/CYBA/TREM2/CYBB	10	GO	LAM2joint: Cluster0
GO:0010872	GO:regulation of cholesterol esterification	4/188	13/18670	6.63197e-06	0.000352956	0.00025676	APOC1/APOE/ABCG1/LAMTOR1	4	GO	LAM2joint: Cluster0
GO:0098754	GO:detoxification	9/188	131/18670	7.22827e-06	0.000378279	0.000275181	MGST3/ALOX5AP/S100A9/APOE/GSTO1/GPX1/TXN/GPX4/PRDX1	9	GO	LAM2joint: Cluster0
GO:0071706	GO:tumor necrosis factor superfamily cytokine production	10/188	168/18670	8.01529e-06	0.000401485	0.000292063	TSPO/ACP5/TYROBP/LPL/FCER1G/PYCARD/GPNMB/CYBA/TREM2/CYBB	10	GO	LAM2joint: Cluster0
GO:0097237	GO:cellular response to toxic substance	12/188	247/18670	8.02536e-06	0.000401485	0.000292063	MGST3/ALOX5AP/S100A9/SPI1/APOE/GSTO1/GPX1/TXN/PSAP/GPX4/CYBB/PRDX1	12	GO	LAM2joint: Cluster0
GO:0097006	GO:regulation of plasma lipoprotein particle levels	8/188	101/18670	8.28004e-06	0.000401485	0.000292063	APOC1/LPL/APOE/ABCG1/LRPAP1/MSR1/AP2S1/ANXA2	8	GO	LAM2joint: Cluster0
GO:0001774	GO:microglial cell activation	6/188	48/18670	8.31101e-06	0.000401485	0.000292063	C1QA/GRN/TYROBP/CTSC/AIF1/TREM2	6	GO	LAM2joint: Cluster0
GO:0002269	GO:leukocyte activation involved in inflammatory response	6/188	48/18670	8.31101e-06	0.000401485	0.000292063	C1QA/GRN/TYROBP/CTSC/AIF1/TREM2	6	GO	LAM2joint: Cluster0
GO:0007159	GO:leukocyte cell-cell adhesion	14/188	337/18670	8.48842e-06	0.000403843	0.000293778	VSIG4/CD74/S100A9/HLA-DPB1/HLA-DPA1/LGALS3/AIF1/PYCARD/HLA-DMB/GPNMB/RAC1/S100A8/RHOA/TNFSF13B	14	GO	LAM2joint: Cluster0
GO:0006641	GO:triglyceride metabolic process	8/188	105/18670	1.10392e-05	0.000517359	0.000376356	APOC1/FABP4/LPL/APOE/FABP5/GPX1/PLAAT3/ABHD5	8	GO	LAM2joint: Cluster0
GO:0002526	GO:acute inflammatory response	11/188	220/18670	1.47525e-05	0.000671741	0.000488662	C1QA/C1QB/SERPINA1/C1QC/VSIG4/SERPING1/TREM1/FCER1G/PPARG/S100A8/FN1	11	GO	LAM2joint: Cluster0
GO:0042590	GO:antigen processing and presentation of exogenous peptide antigen via MHC class I	7/188	79/18670	1.47612e-05	0.000671741	0.000488662	FCER1G/NCF2/VAMP8/CYBA/FCGR1A/PSMA7/CYBB	7	GO	LAM2joint: Cluster0
GO:0006959	GO:humoral immune response	14/188	356/18670	1.5723e-05	0.000690225	0.000502108	C1QA/C1QB/C1QC/HLA-DQB1/VSIG4/SERPING1/TREM1/S100A9/LYZ/CFD/S100A8/SLC11A1/TREM2/RGCC	14	GO	LAM2joint: Cluster0
GO:0055094	GO:response to lipoprotein particle	5/188	32/18670	1.58513e-05	0.000690225	0.000502108	CD68/LPL/APOE/FCER1G/PPARG	5	GO	LAM2joint: Cluster0
GO:0030041	GO:actin filament polymerization	10/188	182/18670	1.61495e-05	0.000690225	0.000502108	AIF1/PYCARD/RAC1/CAPG/TMSB4X/TMSB10/ARPC1B/HCK/ARPC3/RHOA	10	GO	LAM2joint: Cluster0
GO:0010885	GO:regulation of cholesterol storage	4/188	16/18670	1.64863e-05	0.000690225	0.000502108	LPL/ABCG1/PPARG/MSR1	4	GO	LAM2joint: Cluster0
GO:0019372	GO:lipoxygenase pathway	4/188	16/18670	1.64863e-05	0.000690225	0.000502108	ALOX5AP/ALOX5/GPX1/GPX4	4	GO	LAM2joint: Cluster0
GO:0051238	GO:sequestering of metal ion	4/188	16/18670	1.64863e-05	0.000690225	0.000502108	FTL/FTH1/S100A9/S100A8	4	GO	LAM2joint: Cluster0
GO:0062012	GO:regulation of small molecule metabolic process	16/188	459/18670	1.72555e-05	0.000712926	0.000518622	APOC1/TSPO/CD74/FBP1/APOE/ABCG1/OAZ1/FABP5/PPARG/TMSB4X/TREM2/SLC7A7/GPD1/PSMA7/RHOA/COMT	16	GO	LAM2joint: Cluster0
GO:0000041	GO:transition metal ion transport	8/188	112/18670	1.77322e-05	0.000714739	0.000519941	FTL/FTH1/SLC11A1/ATP6V0B/ATP6V1F/ATP6V0D1/SLC31A2/ATP6V1E1	8	GO	LAM2joint: Cluster0
GO:0042098	GO:T cell proliferation	10/188	184/18670	1.77547e-05	0.000714739	0.000519941	VSIG4/HLA-DPB1/HLA-DPA1/LGALS3/AIF1/PYCARD/HLA-DMB/GPNMB/SLC11A1/TNFSF13B	10	GO	LAM2joint: Cluster0
GO:0046456	GO:icosanoid biosynthetic process	6/188	55/18670	1.85199e-05	0.000733458	0.000533558	MGST3/CD74/ALOX5AP/FABP5/ALOX5/LTA4H	6	GO	LAM2joint: Cluster0
GO:0046394	GO:carboxylic acid biosynthetic process	16/188	462/18670	1.86868e-05	0.000733458	0.000533558	APOC1/MGST3/CD74/ALOX5AP/FBP1/LPL/GLUL/CYP27A1/FABP5/ALOX5/LTA4H/APIP/ALDOA/GPX4/GPD1/PKM	16	GO	LAM2joint: Cluster0
GO:0016053	GO:organic acid biosynthetic process	16/188	463/18670	1.91868e-05	0.000743786	0.000541072	APOC1/MGST3/CD74/ALOX5AP/FBP1/LPL/GLUL/CYP27A1/FABP5/ALOX5/LTA4H/APIP/ALDOA/GPX4/GPD1/PKM	16	GO	LAM2joint: Cluster0
GO:0006690	GO:icosanoid metabolic process	8/188	114/18670	2.01756e-05	0.000772576	0.000562015	MGST3/CD74/ALOX5AP/FABP5/ALOX5/GPX1/LTA4H/GPX4	8	GO	LAM2joint: Cluster0
GO:0034433	GO:steroid esterification	4/188	17/18670	2.13896e-05	0.000784981	0.000571039	APOC1/APOE/ABCG1/LAMTOR1	4	GO	LAM2joint: Cluster0
GO:0034434	GO:sterol esterification	4/188	17/18670	2.13896e-05	0.000784981	0.000571039	APOC1/APOE/ABCG1/LAMTOR1	4	GO	LAM2joint: Cluster0
GO:0034435	GO:cholesterol esterification	4/188	17/18670	2.13896e-05	0.000784981	0.000571039	APOC1/APOE/ABCG1/LAMTOR1	4	GO	LAM2joint: Cluster0
GO:0032963	GO:collagen metabolic process	8/188	115/18670	2.14995e-05	0.000784981	0.000571039	CTSD/CTSB/CST3/VIM/PPARG/CTSL/CTSS/RGCC	8	GO	LAM2joint: Cluster0
GO:0051453	GO:regulation of intracellular pH	7/188	84/18670	2.21093e-05	0.000797968	0.000580486	GRN/SLC11A1/ATP6V0B/ATP6V1F/PPT1/ATP6V0D1/ATP6V1E1	7	GO	LAM2joint: Cluster0
GO:0019433	GO:triglyceride catabolic process	5/188	35/18670	2.49355e-05	0.000879858	0.000640058	FABP4/LPL/APOE/FABP5/ABHD5	5	GO	LAM2joint: Cluster0
GO:0050729	GO:positive regulation of inflammatory response	9/188	153/18670	2.51996e-05	0.000879858	0.000640058	FABP4/GRN/S100A9/CTSC/LPL/FCER1G/VAMP8/S100A8/TREM2	9	GO	LAM2joint: Cluster0
GO:0061900	GO:glial cell activation	6/188	58/18670	2.52189e-05	0.000879858	0.000640058	C1QA/GRN/TYROBP/CTSC/AIF1/TREM2	6	GO	LAM2joint: Cluster0
GO:0010878	GO:cholesterol storage	4/188	18/18670	2.72848e-05	0.000931242	0.000677437	LPL/ABCG1/PPARG/MSR1	4	GO	LAM2joint: Cluster0
GO:0034375	GO:high-density lipoprotein particle remodeling	4/188	18/18670	2.72848e-05	0.000931242	0.000677437	APOC1/LPL/APOE/ABCG1	4	GO	LAM2joint: Cluster0
GO:0042554	GO:superoxide anion generation	5/188	36/18670	2.87221e-05	0.000959442	0.000697951	ACP5/TYROBP/NCF2/CYBA/CYBB	5	GO	LAM2joint: Cluster0
GO:0097242	GO:amyloid-beta clearance	5/188	36/18670	2.87221e-05	0.000959442	0.000697951	MARCO/APOE/LRPAP1/MSR1/TREM2	5	GO	LAM2joint: Cluster0
GO:0042129	GO:regulation of T cell proliferation	9/188	156/18670	2.93844e-05	0.000971233	0.000706529	VSIG4/HLA-DPB1/HLA-DPA1/LGALS3/AIF1/PYCARD/HLA-DMB/GPNMB/TNFSF13B	9	GO	LAM2joint: Cluster0
GO:0051047	GO:positive regulation of secretion	15/188	428/18670	2.99552e-05	0.000979784	0.000712749	AIF1/LPL/GLUL/ABCG1/FCER1G/PYCARD/RETN/RAC1/VAMP8/SDCBP/CYBA/S100A8/TREM2/RGCC/TCF7L2	15	GO	LAM2joint: Cluster0
GO:0072593	GO:reactive oxygen species metabolic process	12/188	284/18670	3.2166e-05	0.00102448	0.000745264	TSPO/ACP5/TYROBP/GCHFR/AIF1/NCF2/GPX1/RAC1/CYBA/CYBB/RHOA/PRDX1	12	GO	LAM2joint: Cluster0
GO:0032602	GO:chemokine production	7/188	89/18670	3.22412e-05	0.00102448	0.000745264	CD74/S100A9/AIF1/LPL/PYCARD/S100A8/TREM2	7	GO	LAM2joint: Cluster0
GO:0002696	GO:positive regulation of leukocyte activation	14/188	380/18670	3.23005e-05	0.00102448	0.000745264	CD74/TYROBP/HLA-DPB1/CTSC/HLA-DPA1/AIF1/FCER1G/PYCARD/HLA-DMB/RAC1/VAMP8/TREM2/RHOA/TNFSF13B	14	GO	LAM2joint: Cluster0
GO:1903409	GO:reactive oxygen species biosynthetic process	8/188	122/18670	3.29675e-05	0.00103342	0.000751768	TSPO/ACP5/GCHFR/AIF1/RAC1/CYBA/CYBB/RHOA	8	GO	LAM2joint: Cluster0
GO:0045089	GO:positive regulation of innate immune response	14/188	381/18670	3.32406e-05	0.00103342	0.000751768	MARCO/S100A9/CTSB/FCER1G/UBB/MNDA/PYCARD/CTSL/CYBA/CTSS/S100A8/RTN4/HCK/PSMA7	14	GO	LAM2joint: Cluster0
GO:0030641	GO:regulation of cellular pH	7/188	90/18670	3.4666e-05	0.00106717	0.000776319	GRN/SLC11A1/ATP6V0B/ATP6V1F/PPT1/ATP6V0D1/ATP6V1E1	7	GO	LAM2joint: Cluster0
GO:0006631	GO:fatty acid metabolic process	14/188	383/18670	3.51933e-05	0.00107288	0.000780474	APOC1/CD74/ALOX5AP/CES1/LPL/FABP5/ALOX5/PPARG/DECR1/GPX1/LTA4H/GPX4/ABHD5/ECH1	14	GO	LAM2joint: Cluster0
GO:0019370	GO:leukotriene biosynthetic process	4/188	20/18670	4.25251e-05	0.00128393	0.000934003	MGST3/ALOX5AP/ALOX5/LTA4H	4	GO	LAM2joint: Cluster0
GO:1902905	GO:positive regulation of supramolecular fiber organization	10/188	204/18670	4.29566e-05	0.00128461	0.000934494	S100A10/APOE/PYCARD/GPX1/RAC1/ARPC1B/HCK/ARPC3/RGCC/RHOA	10	GO	LAM2joint: Cluster0
GO:0032368	GO:regulation of lipid transport	8/188	127/18670	4.39726e-05	0.00129041	0.000938717	APOC1/TSPO/APOE/ABCG1/PPARG/RETN/LAMTOR1/ANXA2	8	GO	LAM2joint: Cluster0
GO:0099024	GO:plasma membrane invagination	8/188	127/18670	4.39726e-05	0.00129041	0.000938717	MARCO/AIF1/FCER1G/PPARG/MSR1/FCGR1A/TREM2/RHOA	8	GO	LAM2joint: Cluster0
GO:0072330	GO:monocarboxylic acid biosynthetic process	13/188	343/18670	4.65432e-05	0.0013532	0.000984393	APOC1/CD74/ALOX5AP/FBP1/LPL/CYP27A1/FABP5/ALOX5/LTA4H/ALDOA/GPX4/GPD1/PKM	13	GO	LAM2joint: Cluster0
GO:0050867	GO:positive regulation of cell activation	14/188	394/18670	4.78398e-05	0.00137217	0.000998191	CD74/TYROBP/HLA-DPB1/CTSC/HLA-DPA1/AIF1/FCER1G/PYCARD/HLA-DMB/RAC1/VAMP8/TREM2/RHOA/TNFSF13B	14	GO	LAM2joint: Cluster0
GO:0001818	GO:negative regulation of cytokine production	12/188	296/18670	4.80696e-05	0.00137217	0.000998191	TSPO/VSIG4/ACP5/TYROBP/PYCARD/GPNMB/RAC1/SLC11A1/TMSB4X/TREM2/FN1/RGCC	12	GO	LAM2joint: Cluster0
GO:0006639	GO:acylglycerol metabolic process	8/188	129/18670	4.91586e-05	0.00139061	0.00101161	APOC1/FABP4/LPL/APOE/FABP5/GPX1/PLAAT3/ABHD5	8	GO	LAM2joint: Cluster0
GO:1901568	GO:fatty acid derivative metabolic process	9/188	167/18670	5.01399e-05	0.00140223	0.00102006	MGST3/CD74/ALOX5AP/FABP5/ALOX5/GPX1/LTA4H/PPT1/GPX4	9	GO	LAM2joint: Cluster0
GO:0002758	GO:innate immune response-activating signal transduction	12/188	298/18670	5.12938e-05	0.00140223	0.00102006	MARCO/S100A9/CTSB/FCER1G/UBB/CTSL/CYBA/CTSS/S100A8/RTN4/HCK/PSMA7	12	GO	LAM2joint: Cluster0
GO:0006638	GO:neutral lipid metabolic process	8/188	130/18670	5.19369e-05	0.00140223	0.00102006	APOC1/FABP4/LPL/APOE/FABP5/GPX1/PLAAT3/ABHD5	8	GO	LAM2joint: Cluster0
GO:0007035	GO:vacuolar acidification	4/188	21/18670	5.21187e-05	0.00140223	0.00102006	GRN/SLC11A1/PPT1/ATP6V0D1	4	GO	LAM2joint: Cluster0
GO:0002474	GO:antigen processing and presentation of peptide antigen via MHC class I	7/188	96/18670	5.25692e-05	0.00140223	0.00102006	FCER1G/NCF2/VAMP8/CYBA/FCGR1A/PSMA7/CYBB	7	GO	LAM2joint: Cluster0
GO:0032755	GO:positive regulation of interleukin-6 production	7/188	96/18670	5.25692e-05	0.00140223	0.00102006	CD74/TYROBP/AIF1/LPL/FCER1G/PYCARD/CYBA	7	GO	LAM2joint: Cluster0
GO:0008154	GO:actin polymerization or depolymerization	10/188	209/18670	5.26955e-05	0.00140223	0.00102006	AIF1/PYCARD/RAC1/CAPG/TMSB4X/TMSB10/ARPC1B/HCK/ARPC3/RHOA	10	GO	LAM2joint: Cluster0
GO:0052547	GO:regulation of peptidase activity	15/188	452/18670	5.57716e-05	0.00147162	0.00107054	SERPINA1/GRN/SERPING1/CSTA/S100A9/CTSD/CST3/CSTB/PPARG/PYCARD/GPX1/PCOLCE2/S100A8/FN1/RHOA	15	GO	LAM2joint: Cluster0
GO:0006885	GO:regulation of pH	7/188	98/18670	5.99941e-05	0.00155685	0.00113254	GRN/SLC11A1/ATP6V0B/ATP6V1F/PPT1/ATP6V0D1/ATP6V1E1	7	GO	LAM2joint: Cluster0
GO:0050764	GO:regulation of phagocytosis	7/188	98/18670	5.99941e-05	0.00155685	0.00113254	FCER1G/PPARG/PYCARD/CYBA/SLC11A1/TREM2/HCK	7	GO	LAM2joint: Cluster0
GO:1902903	GO:regulation of supramolecular fiber organization	13/188	352/18670	6.06105e-05	0.00155685	0.00113254	S100A10/APOE/PYCARD/GPX1/RAC1/CAPG/TMSB4X/TMSB10/ARPC1B/HCK/ARPC3/RGCC/RHOA	13	GO	LAM2joint: Cluster0
GO:0022407	GO:regulation of cell-cell adhesion	14/188	403/18670	6.0985e-05	0.00155685	0.00113254	VSIG4/CD74/HLA-DPB1/HLA-DPA1/LGALS3/AIF1/PYCARD/HLA-DMB/GPNMB/RAC1/RGCC/RHOA/TNFSF13B/CITED2	14	GO	LAM2joint: Cluster0
GO:1903037	GO:regulation of leukocyte cell-cell adhesion	12/188	304/18670	6.21159e-05	0.00157294	0.00114424	VSIG4/CD74/HLA-DPB1/HLA-DPA1/LGALS3/AIF1/PYCARD/HLA-DMB/GPNMB/RAC1/RHOA/TNFSF13B	12	GO	LAM2joint: Cluster0
GO:1901570	GO:fatty acid derivative biosynthetic process	7/188	99/18670	6.4016e-05	0.00160808	0.00116981	MGST3/CD74/ALOX5AP/FABP5/ALOX5/LTA4H/PPT1	7	GO	LAM2joint: Cluster0
GO:0010324	GO:membrane invagination	8/188	135/18670	6.78686e-05	0.00168507	0.00122581	MARCO/AIF1/FCER1G/PPARG/MSR1/FCGR1A/TREM2/RHOA	8	GO	LAM2joint: Cluster0
GO:0034381	GO:plasma lipoprotein particle clearance	6/188	69/18670	6.8154e-05	0.00168507	0.00122581	APOC1/APOE/LRPAP1/MSR1/AP2S1/ANXA2	6	GO	LAM2joint: Cluster0
GO:0046461	GO:neutral lipid catabolic process	5/188	43/18670	6.92719e-05	0.00168615	0.0012266	FABP4/LPL/APOE/FABP5/ABHD5	5	GO	LAM2joint: Cluster0
GO:0046464	GO:acylglycerol catabolic process	5/188	43/18670	6.92719e-05	0.00168615	0.0012266	FABP4/LPL/APOE/FABP5/ABHD5	5	GO	LAM2joint: Cluster0
GO:0110053	GO:regulation of actin filament organization	11/188	261/18670	7.04905e-05	0.00170262	0.00123858	S100A10/PYCARD/RAC1/CAPG/TMSB4X/TMSB10/ARPC1B/HCK/ARPC3/RGCC/RHOA	11	GO	LAM2joint: Cluster0
GO:0050766	GO:positive regulation of phagocytosis	6/188	70/18670	7.39258e-05	0.00177196	0.00128902	FCER1G/PPARG/PYCARD/CYBA/SLC11A1/TREM2	6	GO	LAM2joint: Cluster0
GO:0042110	GO:T cell activation	15/188	464/18670	7.4842e-05	0.00178033	0.00129511	VSIG4/CD74/HLA-DPB1/HLA-DPA1/LGALS3/AIF1/FCER1G/PYCARD/HLA-DMB/GPNMB/RAC1/SLC11A1/FKBP1A/RHOA/TNFSF13B	15	GO	LAM2joint: Cluster0
GO:0032799	GO:low-density lipoprotein receptor particle metabolic process	4/188	23/18670	7.5906e-05	0.00179207	0.00130365	APOE/PPARG/AP2S1/ANXA2	4	GO	LAM2joint: Cluster0
GO:0014002	GO:astrocyte development	5/188	44/18670	7.75192e-05	0.00181649	0.00132142	C1QA/GRN/VIM/S100A8/TREM2	5	GO	LAM2joint: Cluster0
GO:0048259	GO:regulation of receptor-mediated endocytosis	7/188	103/18670	8.23712e-05	0.00190965	0.00138919	APOC1/LRPAP1/RAC1/SDCBP/ANXA2/PPT1/DAB2	7	GO	LAM2joint: Cluster0
GO:0045862	GO:positive regulation of proteolysis	13/188	363/18670	8.27109e-05	0.00190965	0.00138919	GRN/S100A9/CTSC/CTSD/APOE/PPARG/PYCARD/PCOLCE2/S100A8/TREM2/DAB2/FN1/RHOA	13	GO	LAM2joint: Cluster0
GO:0050863	GO:regulation of T cell activation	12/188	314/18670	8.45538e-05	0.00193795	0.00140977	VSIG4/CD74/HLA-DPB1/HLA-DPA1/LGALS3/AIF1/PYCARD/HLA-DMB/GPNMB/RAC1/RHOA/TNFSF13B	12	GO	LAM2joint: Cluster0
GO:0006869	GO:lipid transport	13/188	365/18670	8.7403e-05	0.00198873	0.00144672	APOC1/FABP4/TSPO/CES1/APOE/ABCG1/PPARG/RETN/PLIN2/LAMTOR1/MSR1/PSAP/ANXA2	13	GO	LAM2joint: Cluster0
GO:0006801	GO:superoxide metabolic process	6/188	73/18670	9.36141e-05	0.00211474	0.00153838	ACP5/TYROBP/NCF2/CYBA/CYBB/PRDX1	6	GO	LAM2joint: Cluster0
GO:0010883	GO:regulation of lipid storage	5/188	46/18670	9.62644e-05	0.00215622	0.00156855	LPL/ABCG1/PPARG/MSR1/ABHD5	5	GO	LAM2joint: Cluster0
GO:0038094	GO:Fc-gamma receptor signaling pathway	8/188	142/18670	9.68239e-05	0.00215622	0.00156855	FCER1G/RAC1/FCGR2A/FCGR1A/FCGR3A/ARPC1B/HCK/ARPC3	8	GO	LAM2joint: Cluster0
GO:0030574	GO:collagen catabolic process	5/188	47/18670	0.000106851	0.00236277	0.00171881	CTSD/CTSB/CST3/CTSL/CTSS	5	GO	LAM2joint: Cluster0
GO:0002479	GO:antigen processing and presentation of exogenous peptide antigen via MHC class I, TAP-dependent	6/188	75/18670	0.000108907	0.00237477	0.00172754	NCF2/VAMP8/CYBA/FCGR1A/PSMA7/CYBB	6	GO	LAM2joint: Cluster0
GO:0150076	GO:neuroinflammatory response	6/188	75/18670	0.000108907	0.00237477	0.00172754	C1QA/GRN/TYROBP/CTSC/AIF1/TREM2	6	GO	LAM2joint: Cluster0
GO:0030004	GO:cellular monovalent inorganic cation homeostasis	7/188	108/18670	0.000111131	0.00239007	0.00173867	GRN/SLC11A1/ATP6V0B/ATP6V1F/PPT1/ATP6V0D1/ATP6V1E1	7	GO	LAM2joint: Cluster0
GO:0046916	GO:cellular transition metal ion homeostasis	7/188	108/18670	0.000111131	0.00239007	0.00173867	FTL/FTH1/S100A9/S100A8/SLC11A1/ATP6V0D1/SLC31A2	7	GO	LAM2joint: Cluster0
GO:0002431	GO:Fc receptor mediated stimulatory signaling pathway	8/188	145/18670	0.000112033	0.00239309	0.00174087	FCER1G/RAC1/FCGR2A/FCGR1A/FCGR3A/ARPC1B/HCK/ARPC3	8	GO	LAM2joint: Cluster0
GO:0034447	GO:very-low-density lipoprotein particle clearance	3/188	10/18670	0.000114467	0.00242856	0.00176667	APOC1/APOE/LRPAP1	3	GO	LAM2joint: Cluster0
GO:0002224	GO:toll-like receptor signaling pathway	8/188	146/18670	0.000117522	0.00247664	0.00180164	S100A9/CTSB/UBB/CTSL/CYBA/CTSS/S100A8/RTN4	8	GO	LAM2joint: Cluster0
GO:0051249	GO:regulation of lymphocyte activation	15/188	485/18670	0.000122183	0.00255769	0.00186061	VSIG4/CD74/TYROBP/HLA-DPB1/HLA-DPA1/LGALS3/AIF1/LST1/MNDA/PYCARD/HLA-DMB/GPNMB/RAC1/RHOA/TNFSF13B	15	GO	LAM2joint: Cluster0
GO:0003081	GO:regulation of systemic arterial blood pressure by renin-angiotensin	4/188	26/18670	0.000125163	0.00260272	0.00189336	CES1/CTSZ/CYBA/RHOA	4	GO	LAM2joint: Cluster0
GO:0032496	GO:response to lipopolysaccharide	12/188	330/18670	0.000134954	0.00278787	0.00202805	TSPO/ACP5/CD68/VIM/PYCARD/S100A8/SLC11A1/TREM2/LY86/HCK/RHOA/COMT	12	GO	LAM2joint: Cluster0
GO:0010718	GO:positive regulation of epithelial to mesenchymal transition	5/188	50/18670	0.000144031	0.00294126	0.00213964	GLIPR2/SDCBP/DAB2/RGCC/TCF7L2	5	GO	LAM2joint: Cluster0
GO:0051258	GO:protein polymerization	11/188	283/18670	0.000144253	0.00294126	0.00213964	AIF1/PYCARD/RAC1/CAPG/TMSB4X/TMSB10/GPX4/ARPC1B/HCK/ARPC3/RHOA	11	GO	LAM2joint: Cluster0
GO:0055088	GO:lipid homeostasis	8/188	151/18670	0.000148409	0.00300648	0.00218708	FABP4/LPL/APOE/ABCG1/PPARG/LAMTOR1/RTN4/ABHD5	8	GO	LAM2joint: Cluster0
GO:0032675	GO:regulation of interleukin-6 production	8/188	152/18670	0.000155325	0.00312452	0.00227295	CD74/TYROBP/AIF1/LPL/FCER1G/PYCARD/CYBA/TREM2	8	GO	LAM2joint: Cluster0
GO:0002604	GO:regulation of dendritic cell antigen processing and presentation	3/188	11/18670	0.000156226	0.00312452	0.00227295	CD74/CD68/SLC11A1	3	GO	LAM2joint: Cluster0
GO:0034368	GO:protein-lipid complex remodeling	4/188	28/18670	0.000168743	0.00330148	0.00240168	APOC1/LPL/APOE/ABCG1	4	GO	LAM2joint: Cluster0
GO:0034369	GO:plasma lipoprotein particle remodeling	4/188	28/18670	0.000168743	0.00330148	0.00240168	APOC1/LPL/APOE/ABCG1	4	GO	LAM2joint: Cluster0
GO:0090383	GO:phagosome acidification	4/188	28/18670	0.000168743	0.00330148	0.00240168	ATP6V0B/ATP6V1F/ATP6V0D1/ATP6V1E1	4	GO	LAM2joint: Cluster0
GO:0055067	GO:monovalent inorganic cation homeostasis	8/188	154/18670	0.000169955	0.00330148	0.00240168	GRN/SLC11A1/ATP6V0B/ATP6V1F/PPT1/ATP6V0D1/ATP6V1E1/COMT	8	GO	LAM2joint: Cluster0
GO:0002791	GO:regulation of peptide secretion	15/188	500/18670	0.000170331	0.00330148	0.00240168	CD74/ANXA5/AIF1/LPL/APOE/GLUL/ABCG1/PYCARD/RAC1/S100A8/TMSB4X/TREM2/FN1/RGCC/TCF7L2	15	GO	LAM2joint: Cluster0
GO:0002221	GO:pattern recognition receptor signaling pathway	9/188	197/18670	0.000177297	0.00339459	0.00246941	MARCO/S100A9/CTSB/UBB/CTSL/CYBA/CTSS/S100A8/RTN4	9	GO	LAM2joint: Cluster0
GO:0010952	GO:positive regulation of peptidase activity	9/188	197/18670	0.000177297	0.00339459	0.00246941	GRN/S100A9/CTSD/PPARG/PYCARD/PCOLCE2/S100A8/FN1/RHOA	9	GO	LAM2joint: Cluster0
GO:1905954	GO:positive regulation of lipid localization	6/188	82/18670	0.000178687	0.00340047	0.00247369	LPL/APOE/ABCG1/RETN/MSR1/ANXA2	6	GO	LAM2joint: Cluster0
GO:0048145	GO:regulation of fibroblast proliferation	6/188	83/18670	0.000191018	0.00356618	0.00259424	CD74/FTH1/PPARG/ANXA2/S100A6/FN1	6	GO	LAM2joint: Cluster0
GO:0050866	GO:negative regulation of cell activation	9/188	199/18670	0.000191227	0.00356618	0.00259424	VSIG4/GRN/CD74/TYROBP/LGALS3/LST1/APOE/MNDA/GPNMB	9	GO	LAM2joint: Cluster0
GO:0002237	GO:response to molecule of bacterial origin	12/188	343/18670	0.000193102	0.00356618	0.00259424	TSPO/ACP5/CD68/VIM/PYCARD/S100A8/SLC11A1/TREM2/LY86/HCK/RHOA/COMT	12	GO	LAM2joint: Cluster0
GO:0006911	GO:phagocytosis, engulfment	7/188	118/18670	0.000193139	0.00356618	0.00259424	MARCO/AIF1/FCER1G/PPARG/MSR1/FCGR1A/TREM2	7	GO	LAM2joint: Cluster0
GO:0034367	GO:protein-containing complex remodeling	4/188	29/18670	0.000194209	0.00356618	0.00259424	APOC1/LPL/APOE/ABCG1	4	GO	LAM2joint: Cluster0
GO:0048261	GO:negative regulation of receptor-mediated endocytosis	4/188	29/18670	0.000194209	0.00356618	0.00259424	APOC1/LRPAP1/RAC1/SDCBP	4	GO	LAM2joint: Cluster0
GO:0048144	GO:fibroblast proliferation	6/188	84/18670	0.000204011	0.00370985	0.00269875	CD74/FTH1/PPARG/ANXA2/S100A6/FN1	6	GO	LAM2joint: Cluster0
GO:0002468	GO:dendritic cell antigen processing and presentation	3/188	12/18670	0.000206759	0.00370985	0.00269875	CD74/CD68/SLC11A1	3	GO	LAM2joint: Cluster0
GO:0010889	GO:regulation of sequestering of triglyceride	3/188	12/18670	0.000206759	0.00370985	0.00269875	LPL/PPARG/ABHD5	3	GO	LAM2joint: Cluster0
GO:0033700	GO:phospholipid efflux	3/188	12/18670	0.000206759	0.00370985	0.00269875	APOC1/APOE/ABCG1	3	GO	LAM2joint: Cluster0
GO:1903532	GO:positive regulation of secretion by cell	13/188	399/18670	0.000210678	0.0037587	0.00273428	AIF1/LPL/GLUL/ABCG1/FCER1G/PYCARD/RETN/RAC1/VAMP8/SDCBP/TREM2/RGCC/TCF7L2	13	GO	LAM2joint: Cluster0
GO:0050852	GO:T cell receptor signaling pathway	9/188	202/18670	0.000213822	0.00377192	0.00274391	HLA-DRB1/HLA-DQB1/HLA-DRA/HLA-DPB1/HLA-DPA1/LGALS3/HLA-DRB5/HLA-DQA1/PSMA7	9	GO	LAM2joint: Cluster0
GO:0050870	GO:positive regulation of T cell activation	9/188	202/18670	0.000213822	0.00377192	0.00274391	CD74/HLA-DPB1/HLA-DPA1/AIF1/PYCARD/HLA-DMB/RAC1/RHOA/TNFSF13B	9	GO	LAM2joint: Cluster0
GO:0007015	GO:actin filament organization	13/188	400/18670	0.000215865	0.00378668	0.00275464	S100A10/AIF1/PYCARD/RAC1/CAPG/TMSB4X/ALDOA/TMSB10/ARPC1B/HCK/ARPC3/RGCC/RHOA	13	GO	LAM2joint: Cluster0
GO:0010743	GO:regulation of macrophage derived foam cell differentiation	4/188	30/18670	0.000222333	0.00387848	0.00282142	LPL/ABCG1/PPARG/MSR1	4	GO	LAM2joint: Cluster0
GO:0043030	GO:regulation of macrophage activation	5/188	55/18670	0.000227067	0.00393916	0.00286556	VSIG4/GRN/CD74/CTSC/TREM2	5	GO	LAM2joint: Cluster0
GO:0002573	GO:myeloid leukocyte differentiation	9/188	204/18670	0.000230086	0.00393916	0.00286556	C1QC/CD74/TYROBP/SPI1/FCER1G/PPARG/ANXA2/SNX10/TREM2	9	GO	LAM2joint: Cluster0
GO:0032635	GO:interleukin-6 production	8/188	161/18670	0.000230374	0.00393916	0.00286556	CD74/TYROBP/AIF1/LPL/FCER1G/PYCARD/CYBA/TREM2	8	GO	LAM2joint: Cluster0
GO:0032760	GO:positive regulation of tumor necrosis factor production	6/188	86/18670	0.000232084	0.00393916	0.00286556	TYROBP/LPL/FCER1G/PYCARD/CYBA/CYBB	6	GO	LAM2joint: Cluster0
GO:0048013	GO:ephrin receptor signaling pathway	6/188	86/18670	0.000232084	0.00393916	0.00286556	RAC1/AP2S1/SDCBP/ARPC1B/ARPC3/RHOA	6	GO	LAM2joint: Cluster0
GO:0030833	GO:regulation of actin filament polymerization	8/188	162/18670	0.000240287	0.00405646	0.0029509	PYCARD/CAPG/TMSB4X/TMSB10/ARPC1B/HCK/ARPC3/RHOA	8	GO	LAM2joint: Cluster0
GO:0006691	GO:leukotriene metabolic process	4/188	31/18670	0.000253274	0.00425284	0.00309375	MGST3/ALOX5AP/ALOX5/LTA4H	4	GO	LAM2joint: Cluster0
GO:0002683	GO:negative regulation of immune system process	14/188	463/18670	0.000259592	0.00433574	0.00315406	C1QC/VSIG4/GRN/SERPING1/CD74/TYROBP/CD68/LGALS3/LST1/FCER1G/PPARG/MNDA/GPX1/GPNMB	14	GO	LAM2joint: Cluster0
GO:0006633	GO:fatty acid biosynthetic process	8/188	164/18670	0.000261164	0.00433892	0.00315637	APOC1/CD74/ALOX5AP/LPL/FABP5/ALOX5/LTA4H/GPX4	8	GO	LAM2joint: Cluster0
GO:1903557	GO:positive regulation of tumor necrosis factor superfamily cytokine production	6/188	88/18670	0.000263113	0.00434828	0.00316318	TYROBP/LPL/FCER1G/PYCARD/CYBA/CYBB	6	GO	LAM2joint: Cluster0
GO:0001819	GO:positive regulation of cytokine production	14/188	464/18670	0.00026534	0.00436128	0.00317264	CD74/TYROBP/HLA-DPB1/HLA-DPA1/AIF1/LPL/FCER1G/MNDA/PYCARD/CYBA/SLC11A1/TREM2/CYBB/RGCC	14	GO	LAM2joint: Cluster0
GO:0002281	GO:macrophage activation involved in immune response	3/188	13/18670	0.000266797	0.00436128	0.00317264	GRN/TYROBP/TREM2	3	GO	LAM2joint: Cluster0
GO:0042743	GO:hydrogen peroxide metabolic process	5/188	57/18670	0.000268899	0.00436128	0.00317264	GPX1/RAC1/CYBA/CYBB/PRDX1	5	GO	LAM2joint: Cluster0
GO:0022409	GO:positive regulation of cell-cell adhesion	10/188	255/18670	0.000269455	0.00436128	0.00317264	CD74/HLA-DPB1/HLA-DPA1/AIF1/PYCARD/HLA-DMB/RAC1/RHOA/TNFSF13B/CITED2	10	GO	LAM2joint: Cluster0
GO:2001242	GO:regulation of intrinsic apoptotic signaling pathway	8/188	165/18670	0.000272146	0.00438225	0.00318789	CD74/S100A9/UBB/PYCARD/GPX1/GRINA/S100A8/PTPMT1	8	GO	LAM2joint: Cluster0
GO:0032651	GO:regulation of interleukin-1 beta production	6/188	90/18670	0.000297312	0.00476306	0.00346491	ACP5/TYROBP/LPL/MNDA/PYCARD/TREM2	6	GO	LAM2joint: Cluster0
GO:0001558	GO:regulation of cell growth	13/188	416/18670	0.000315029	0.00502127	0.00365275	FBP1/S100A9/CXCL16/APOE/PPARG/LAMTOR1/SDCBP/CYBA/S100A8/RTN4/PPT1/FN1/RHOA	13	GO	LAM2joint: Cluster0
GO:0002687	GO:positive regulation of leukocyte migration	7/188	128/18670	0.000318312	0.00504798	0.00367218	CD74/LGALS3/AIF1/PYCARD/RAC1/TREM2/RHOA	7	GO	LAM2joint: Cluster0
GO:0015850	GO:organic hydroxy compound transport	10/188	262/18670	0.000334174	0.0052729	0.0038358	APOC1/TSPO/CES1/APOE/ABCG1/FCER1G/PPARG/LAMTOR1/MSR1/ANXA2	10	GO	LAM2joint: Cluster0
GO:0032802	GO:low-density lipoprotein particle receptor catabolic process	3/188	14/18670	0.000337048	0.00529165	0.00384944	APOE/AP2S1/ANXA2	3	GO	LAM2joint: Cluster0
GO:0050671	GO:positive regulation of lymphocyte proliferation	7/188	130/18670	0.000349794	0.00546444	0.00397514	CD74/HLA-DPB1/HLA-DPA1/AIF1/PYCARD/HLA-DMB/TNFSF13B	7	GO	LAM2joint: Cluster0
GO:0051262	GO:protein tetramerization	8/188	172/18670	0.000360071	0.00559714	0.00407167	CD74/FBP1/S100A10/DECR1/ANXA2/APIP/ALDOA/PKM	8	GO	LAM2joint: Cluster0
GO:0032946	GO:positive regulation of mononuclear cell proliferation	7/188	131/18670	0.000366444	0.00563761	0.00410111	CD74/HLA-DPB1/HLA-DPA1/AIF1/PYCARD/HLA-DMB/TNFSF13B	7	GO	LAM2joint: Cluster0
GO:0055076	GO:transition metal ion homeostasis	7/188	131/18670	0.000366444	0.00563761	0.00410111	FTL/FTH1/S100A9/S100A8/SLC11A1/ATP6V0D1/SLC31A2	7	GO	LAM2joint: Cluster0
GO:0007040	GO:lysosome organization	5/188	61/18670	0.000369856	0.00563761	0.00410111	GRN/LAMTOR1/HEXB/PPT1/GAA	5	GO	LAM2joint: Cluster0
GO:0080171	GO:lytic vacuole organization	5/188	61/18670	0.000369856	0.00563761	0.00410111	GRN/LAMTOR1/HEXB/PPT1/GAA	5	GO	LAM2joint: Cluster0
GO:0032271	GO:regulation of protein polymerization	9/188	218/18670	0.000375186	0.00566387	0.00412021	PYCARD/RAC1/CAPG/TMSB4X/TMSB10/ARPC1B/HCK/ARPC3/RHOA	9	GO	LAM2joint: Cluster0
GO:1903039	GO:positive regulation of leukocyte cell-cell adhesion	9/188	218/18670	0.000375186	0.00566387	0.00412021	CD74/HLA-DPB1/HLA-DPA1/AIF1/PYCARD/HLA-DMB/RAC1/RHOA/TNFSF13B	9	GO	LAM2joint: Cluster0
GO:0032535	GO:regulation of cellular component size	12/188	370/18670	0.000384538	0.00577728	0.00420271	APOE/PYCARD/RAC1/CAPG/TMSB4X/RTN4/TMSB10/ARPC1B/HCK/ARPC3/FN1/RHOA	12	GO	LAM2joint: Cluster0
GO:0042102	GO:positive regulation of T cell proliferation	6/188	95/18670	0.000398167	0.00594562	0.00432517	HLA-DPB1/HLA-DPA1/AIF1/PYCARD/HLA-DMB/TNFSF13B	6	GO	LAM2joint: Cluster0
GO:0031668	GO:cellular response to extracellular stimulus	10/188	268/18670	0.00039953	0.00594562	0.00432517	CD68/AIF1/LPL/GLUL/PPARG/CYBA/UPP1/LAMP2/CYBB/COMT	10	GO	LAM2joint: Cluster0
GO:0002695	GO:negative regulation of leukocyte activation	8/188	175/18670	0.000404236	0.00598727	0.00435547	VSIG4/GRN/CD74/TYROBP/LGALS3/LST1/MNDA/GPNMB	8	GO	LAM2joint: Cluster0
GO:0051098	GO:regulation of binding	12/188	373/18670	0.000413368	0.00602353	0.00438185	LGALS3/S100A10/CTSZ/APOE/LRPAP1/PPARG/TXN/ANXA2/TMSB4X/FKBP1A/DAB2/TCF7L2	12	GO	LAM2joint: Cluster0
GO:0006098	GO:pentose-phosphate shunt	3/188	15/18670	0.000418194	0.00602353	0.00438185	TKT/PGD/TALDO1	3	GO	LAM2joint: Cluster0
GO:0019321	GO:pentose metabolic process	3/188	15/18670	0.000418194	0.00602353	0.00438185	TKT/PGD/TALDO1	3	GO	LAM2joint: Cluster0
GO:0030730	GO:sequestering of triglyceride	3/188	15/18670	0.000418194	0.00602353	0.00438185	LPL/PPARG/ABHD5	3	GO	LAM2joint: Cluster0
GO:0042159	GO:lipoprotein catabolic process	3/188	15/18670	0.000418194	0.00602353	0.00438185	CTSD/APOE/PPT1	3	GO	LAM2joint: Cluster0
GO:0090197	GO:positive regulation of chemokine secretion	3/188	15/18670	0.000418194	0.00602353	0.00438185	AIF1/LPL/PYCARD	3	GO	LAM2joint: Cluster0
GO:0010742	GO:macrophage derived foam cell differentiation	4/188	36/18670	0.000455901	0.00647751	0.0047121	LPL/ABCG1/PPARG/MSR1	4	GO	LAM2joint: Cluster0
GO:0033572	GO:transferrin transport	4/188	36/18670	0.000455901	0.00647751	0.0047121	ATP6V0B/ATP6V1F/ATP6V0D1/ATP6V1E1	4	GO	LAM2joint: Cluster0
GO:0090077	GO:foam cell differentiation	4/188	36/18670	0.000455901	0.00647751	0.0047121	LPL/ABCG1/PPARG/MSR1	4	GO	LAM2joint: Cluster0
GO:0008064	GO:regulation of actin polymerization or depolymerization	8/188	179/18670	0.00046988	0.00659402	0.00479685	PYCARD/CAPG/TMSB4X/TMSB10/ARPC1B/HCK/ARPC3/RHOA	8	GO	LAM2joint: Cluster0
GO:0051099	GO:positive regulation of binding	8/188	179/18670	0.00046988	0.00659402	0.00479685	LGALS3/S100A10/APOE/PPARG/TXN/ANXA2/FKBP1A/TCF7L2	8	GO	LAM2joint: Cluster0
GO:0046364	GO:monosaccharide biosynthetic process	6/188	98/18670	0.000470401	0.00659402	0.00479685	FBP1/TKT/PGD/TALDO1/ALDOA/GPD1	6	GO	LAM2joint: Cluster0
GO:0030832	GO:regulation of actin filament length	8/188	180/18670	0.000487574	0.00679276	0.00494143	PYCARD/CAPG/TMSB4X/TMSB10/ARPC1B/HCK/ARPC3/RHOA	8	GO	LAM2joint: Cluster0
GO:0043270	GO:positive regulation of ion transport	10/188	275/18670	0.000488906	0.00679276	0.00494143	TSPO/LGALS3/APOE/GSTO1/VAMP8/ANXA2/GLRX/CTSS/TMSB4X/TREM2	10	GO	LAM2joint: Cluster0
GO:0010565	GO:regulation of cellular ketone metabolic process	8/188	181/18670	0.000505804	0.00699659	0.00508971	APOC1/CD74/OAZ1/FABP5/PPARG/SLC7A7/PSMA7/COMT	8	GO	LAM2joint: Cluster0
GO:0097067	GO:cellular response to thyroid hormone stimulus	3/188	16/18670	0.000510896	0.00703602	0.00511839	CTSB/CTSL/CTSS	3	GO	LAM2joint: Cluster0
GO:0002433	GO:immune response-regulating cell surface receptor signaling pathway involved in phagocytosis	7/188	139/18670	0.000523766	0.00711959	0.00517919	RAC1/FCGR2A/FCGR1A/FCGR3A/ARPC1B/HCK/ARPC3	7	GO	LAM2joint: Cluster0
GO:0038096	GO:Fc-gamma receptor signaling pathway involved in phagocytosis	7/188	139/18670	0.000523766	0.00711959	0.00517919	RAC1/FCGR2A/FCGR1A/FCGR3A/ARPC1B/HCK/ARPC3	7	GO	LAM2joint: Cluster0
GO:0070665	GO:positive regulation of leukocyte proliferation	7/188	139/18670	0.000523766	0.00711959	0.00517919	CD74/HLA-DPB1/HLA-DPA1/AIF1/PYCARD/HLA-DMB/TNFSF13B	7	GO	LAM2joint: Cluster0
GO:0032611	GO:interleukin-1 beta production	6/188	101/18670	0.000552461	0.00744519	0.00541604	ACP5/TYROBP/LPL/MNDA/PYCARD/TREM2	6	GO	LAM2joint: Cluster0
GO:1903426	GO:regulation of reactive oxygen species biosynthetic process	6/188	101/18670	0.000552461	0.00744519	0.00541604	TSPO/ACP5/AIF1/RAC1/CYBA/RHOA	6	GO	LAM2joint: Cluster0
GO:0015682	GO:ferric iron transport	4/188	38/18670	0.00056241	0.00751476	0.00546665	ATP6V0B/ATP6V1F/ATP6V0D1/ATP6V1E1	4	GO	LAM2joint: Cluster0
GO:0072512	GO:trivalent inorganic cation transport	4/188	38/18670	0.00056241	0.00751476	0.00546665	ATP6V0B/ATP6V1F/ATP6V0D1/ATP6V1E1	4	GO	LAM2joint: Cluster0
GO:0044282	GO:small molecule catabolic process	13/188	445/18670	0.000594939	0.00791571	0.00575833	ALDH2/APOE/GLUL/CYP27A1/DECR1/PGD/ALDOA/HEXB/UPP1/TYMP/HNMT/ECH1/PKM	13	GO	LAM2joint: Cluster0
GO:0045806	GO:negative regulation of endocytosis	5/188	68/18670	0.000612317	0.00808834	0.00588391	APOC1/LGALS3/LRPAP1/RAC1/SDCBP	5	GO	LAM2joint: Cluster0
GO:0032652	GO:regulation of interleukin-1 production	6/188	103/18670	0.000613065	0.00808834	0.00588391	ACP5/TYROBP/LPL/MNDA/PYCARD/TREM2	6	GO	LAM2joint: Cluster0
GO:0030593	GO:neutrophil chemotaxis	6/188	104/18670	0.000645238	0.00847719	0.00616678	CD74/S100A9/LGALS3/FCER1G/RAC1/S100A8	6	GO	LAM2joint: Cluster0
GO:0071496	GO:cellular response to external stimulus	11/188	339/18670	0.000668693	0.00874873	0.00636431	CD68/AIF1/LPL/GLUL/PPARG/RAC1/CYBA/UPP1/LAMP2/CYBB/COMT	11	GO	LAM2joint: Cluster0
GO:0001990	GO:regulation of systemic arterial blood pressure by hormone	4/188	40/18670	0.00068549	0.00889633	0.00647169	CES1/CTSZ/CYBA/RHOA	4	GO	LAM2joint: Cluster0
GO:0031669	GO:cellular response to nutrient levels	9/188	237/18670	0.000685641	0.00889633	0.00647169	CD68/LPL/GLUL/PPARG/CYBA/UPP1/LAMP2/CYBB/COMT	9	GO	LAM2joint: Cluster0
GO:0002793	GO:positive regulation of peptide secretion	10/188	288/18670	0.000698987	0.00903127	0.00656985	AIF1/LPL/GLUL/ABCG1/PYCARD/RAC1/S100A8/TREM2/RGCC/TCF7L2	10	GO	LAM2joint: Cluster0
GO:0051250	GO:negative regulation of lymphocyte activation	7/188	146/18670	0.000701793	0.00903127	0.00656985	VSIG4/CD74/TYROBP/LGALS3/LST1/MNDA/GPNMB	7	GO	LAM2joint: Cluster0
GO:0097193	GO:intrinsic apoptotic signaling pathway	10/188	289/18670	0.000717832	0.00919997	0.00669257	CD74/S100A9/UBB/PYCARD/GPX1/GRINA/S100A8/PHLDA3/PTPMT1/CRIP1	10	GO	LAM2joint: Cluster0
GO:0090196	GO:regulation of chemokine secretion	3/188	18/18670	0.000733491	0.00929509	0.00676177	AIF1/LPL/PYCARD	3	GO	LAM2joint: Cluster0
GO:1900221	GO:regulation of amyloid-beta clearance	3/188	18/18670	0.000733491	0.00929509	0.00676177	APOE/LRPAP1/TREM2	3	GO	LAM2joint: Cluster0
GO:0032956	GO:regulation of actin cytoskeleton organization	11/188	343/18670	0.000736332	0.00929509	0.00676177	S100A10/PYCARD/RAC1/CAPG/TMSB4X/TMSB10/ARPC1B/HCK/ARPC3/RGCC/RHOA	11	GO	LAM2joint: Cluster0
GO:0042063	GO:gliogenesis	10/188	290/18670	0.000737095	0.00929509	0.00676177	C1QA/TSPO/GRN/VIM/PPARG/S100A8/HEXB/RTN4/TREM2/RHOA	10	GO	LAM2joint: Cluster0
GO:0043112	GO:receptor metabolic process	8/188	192/18670	0.000745333	0.00936138	0.00680999	APOE/FCER1G/LRPAP1/PPARG/LAMTOR1/AP2S1/SDCBP/ANXA2	8	GO	LAM2joint: Cluster0
GO:0038093	GO:Fc receptor signaling pathway	9/188	241/18670	0.000772273	0.00964217	0.00701425	FCER1G/RAC1/FCGR2A/FCGR1A/FCGR3A/ARPC1B/HCK/ARPC3/PSMA7	9	GO	LAM2joint: Cluster0
GO:0002697	GO:regulation of immune effector process	13/188	458/18670	0.000776377	0.00964217	0.00701425	C1QA/C1QB/C1QC/VSIG4/GRN/SERPING1/CD74/LGALS3/FCER1G/STXBP2/PYCARD/HLA-DMB/VAMP8	13	GO	LAM2joint: Cluster0
GO:0005996	GO:monosaccharide metabolic process	10/188	292/18670	0.000776901	0.00964217	0.00701425	FBP1/TKT/FABP5/GSTO1/PGD/TALDO1/ALDOA/GPD1/GAA/PKM	10	GO	LAM2joint: Cluster0
GO:0002532	GO:production of molecular mediator involved in inflammatory response	5/188	72/18670	0.000795681	0.00983637	0.00715553	GRN/FCER1G/ALOX5/PYCARD/VAMP8	5	GO	LAM2joint: Cluster0
GO:0045785	GO:positive regulation of cell adhesion	12/188	403/18670	0.000816866	0.0100587	0.00731723	CD74/HLA-DPB1/HLA-DPA1/S100A10/AIF1/PYCARD/HLA-DMB/RAC1/FN1/RHOA/TNFSF13B/CITED2	12	GO	LAM2joint: Cluster0
GO:0032945	GO:negative regulation of mononuclear cell proliferation	5/188	73/18670	0.000847304	0.0103523	0.00753082	VSIG4/TYROBP/LST1/MNDA/GPNMB	5	GO	LAM2joint: Cluster0
GO:0050672	GO:negative regulation of lymphocyte proliferation	5/188	73/18670	0.000847304	0.0103523	0.00753082	VSIG4/TYROBP/LST1/MNDA/GPNMB	5	GO	LAM2joint: Cluster0
GO:0010888	GO:negative regulation of lipid storage	3/188	19/18670	0.000864591	0.0105225	0.00765468	ABCG1/PPARG/ABHD5	3	GO	LAM2joint: Cluster0
GO:2001233	GO:regulation of apoptotic signaling pathway	12/188	406/18670	0.000871019	0.0105598	0.00768182	CD74/S100A9/CTSC/LGALS3/UBB/PYCARD/GPX1/GRINA/S100A8/YWHAH/PTPMT1/TCF7L2	12	GO	LAM2joint: Cluster0
GO:0042133	GO:neurotransmitter metabolic process	7/188	153/18670	0.00092471	0.0111249	0.00809285	TSPO/ACP5/GCHFR/AIF1/RAC1/HNMT/COMT	7	GO	LAM2joint: Cluster0
GO:0062013	GO:positive regulation of small molecule metabolic process	7/188	153/18670	0.00092471	0.0111249	0.00809285	CD74/ABCG1/PPARG/TMSB4X/TREM2/GPD1/COMT	7	GO	LAM2joint: Cluster0
GO:0042180	GO:cellular ketone metabolic process	9/188	248/18670	0.000945265	0.0113288	0.00824117	APOC1/CD74/OAZ1/FABP5/PPARG/SLC7A7/GPD1/PSMA7/COMT	9	GO	LAM2joint: Cluster0
GO:0090382	GO:phagosome maturation	4/188	44/18670	0.000986839	0.011782	0.00857091	ATP6V0B/ATP6V1F/ATP6V0D1/ATP6V1E1	4	GO	LAM2joint: Cluster0
GO:0090195	GO:chemokine secretion	3/188	20/18670	0.00100966	0.0119635	0.00870294	AIF1/LPL/PYCARD	3	GO	LAM2joint: Cluster0
GO:1903978	GO:regulation of microglial cell activation	3/188	20/18670	0.00100966	0.0119635	0.00870294	GRN/CTSC/TREM2	3	GO	LAM2joint: Cluster0
GO:0050708	GO:regulation of protein secretion	13/188	472/18670	0.00102181	0.0120619	0.00877451	ANXA5/AIF1/LPL/APOE/GLUL/ABCG1/PYCARD/RAC1/TMSB4X/TREM2/FN1/RGCC/TCF7L2	13	GO	LAM2joint: Cluster0
GO:0046486	GO:glycerolipid metabolic process	12/188	414/18670	0.00103028	0.0121164	0.00881413	APOC1/FABP4/LPL/APOE/FABP5/PLBD1/GPX1/PNPLA6/PLAAT3/ABHD5/PTPMT1/GPD1	12	GO	LAM2joint: Cluster0
GO:0071827	GO:plasma lipoprotein particle organization	4/188	45/18670	0.00107468	0.0125914	0.00915966	APOC1/LPL/APOE/ABCG1	4	GO	LAM2joint: Cluster0
GO:0006809	GO:nitric oxide biosynthetic process	5/188	77/18670	0.00107907	0.0125959	0.00916294	TSPO/ACP5/GCHFR/AIF1/RAC1	5	GO	LAM2joint: Cluster0
GO:0032612	GO:interleukin-1 production	6/188	115/18670	0.00109248	0.0127052	0.00924244	ACP5/TYROBP/LPL/MNDA/PYCARD/TREM2	6	GO	LAM2joint: Cluster0
GO:0070664	GO:negative regulation of leukocyte proliferation	5/188	78/18670	0.0011437	0.0132517	0.00964005	VSIG4/TYROBP/LST1/MNDA/GPNMB	5	GO	LAM2joint: Cluster0
[truncated: 7,423 more rows]

## Sheet: LAM2 Clusterwise Marker Genes
Cluster	Top200_Genes
[truncated: 19 more rows]

[truncated: 7 more sheets: LAM2 Clusterwise Enrichment, WT Clusterwise Marker Genes, WT Clusterwise Enrichment, LAM1_16vsWT9&12 Marker Genes, LAM1_16vsWT9&12 Enrichment, LAM2joint_16vsWT9&12 Marker Gen, LAM2joint_16vsWT9&12 Enrichment]
